# Supplementary material for: Unsymmetric N-heterocyclic carbene ligand enabled nickel-catalysed arylation of bulky primary and secondary amines
Source: Royal Society of Chemistry journal article supplement (doi:10.1039/d3sc00492a), 2023-01-01

## Supporting Information

### Unsymmetrical *N*-Heterocyclic Carbene Ligand Enabled Nickel-Catalysed Arylation of Bulky Primary and Secondary Amines

Zi-Chao Wang<sup>[a]</sup>, Yan-Yu Li<sup>[b]</sup>, Shuo-Qing Zhang<sup>[b]</sup>, Xin Hong<sup>\*[b,c,d]</sup> and Shi-Liang Shi<sup>\*[a]</sup>

[a] State Key Laboratory of Organometallic Chemistry, Shanghai Institute of Organic Chemistry, University of Chinese Academy of Sciences, Chinese Academy of Sciences, 345 Lingling Road, Shanghai 200032, China

E-mail: shiliangshi@sioc.ac.cn

[b] Department of Chemistry, Zhejiang University, 38 Zheda Road, Hangzhou 310027, China

[c] Beijing National Laboratory for Molecular Sciences, Zhongguancun North First Street NO. 2, Beijing 100190, China

[d] Key Laboratory of Precise Synthesis of Functional Molecules of Zhejiang Province, School of Science, Westlake University, 18 Shilongshan Road, Hangzhou 310024, Zhejiang Province, China

#### Table of contents

|                                                                           |     |
|---------------------------------------------------------------------------|-----|
| <b>General Information</b> .....                                          | 2   |
| <b>Reaction Optimization</b> .....                                        | 3   |
| <b>Nickel/NHC-Catalyzed Arylation of Sterically Hindered Amines</b> ..... | 5   |
| <b>DFT Calculations of the Ni-Catalyzed <i>N</i>-Arylation</b> .....      | 32  |
| <b>References</b> .....                                                   | 147 |
| <b>NMR Spectra</b> .....                                                  | 149 |

---

## General Information

All the reactions were conducted under N<sub>2</sub> atmosphere with a standard dry box. The glassware was dried in an oven (140 °C) or flame-dried. Reaction solvents including anhydrous cyclohexane, tetrahydrofuran (THF), *N,N*-dimethylformamide (DMA), toluene, etc., were purchased from Energy Chemical Co. Ltd. or J&K Chemical Co. Ltd. and used as received. Ni(COD)<sub>2</sub> was purchased from Strem Chemicals Inc. and stored in the refrigerator at -20 °C. 1,2,3,4-tetrahydroquinoline was purchased from Energy Chemical Co. Ltd. and used as received. 4-chlorobenzotrifluoride was purchased from Energy Chemical Co. Ltd. and used as received. All new compounds were characterized by NMR spectroscopy, IR spectroscopy, high-resolution mass spectroscopy, and melting point (if solids). NMR spectra were recorded on an Agilent 400 MHz or 600MHz, Varian 400 MHz, or Bruker 400 MHz spectrometers and were calibrated using residual solvent as an internal reference (CDCl<sub>3</sub>: 7.26 ppm for <sup>1</sup>H NMR and 77.16 ppm for <sup>13</sup>C NMR). Melting points were measured on an SGW X-4 apparatus. All IR spectra were taken on a BRUKER TENSOR 27 FT-IR spectrometer. EI-HRMS spectra were obtained on a Waters Micromass G1540N/GCT Premier, and ESI-HRMS spectra were obtained on a Thermo Fisher Scientific LTQ FT Ultra or Agilent Technologies 6224 TOF LC/MS.

## Reaction Optimization

**Table 1.** Ligand and Base Optimization<sup>a</sup>

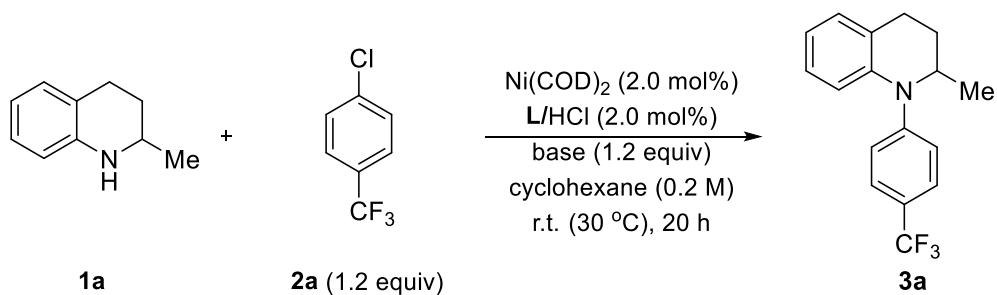

| Entry          | Ligand    | Base           | Yield (%) <sup>b</sup> | Entry           | Ligand    | Base                                        | Yield (%) <sup>b</sup> |
|----------------|-----------|----------------|------------------------|-----------------|-----------|---------------------------------------------|------------------------|
| 1              | <b>L1</b> | <i>t</i> -BuOK | 0                      | 8               | <b>L6</b> | CsF <sup>d</sup>                            | <2%                    |
| 2              | <b>L2</b> | <i>t</i> -BuOK | 26                     | 9               | <b>L6</b> | K <sub>3</sub> PO <sub>4</sub> <sup>d</sup> | 0                      |
| 3              | <b>L3</b> | <i>t</i> -BuOK | 24                     | 10              | <b>L6</b> | DBU <sup>d</sup>                            | 0                      |
| 4              | <b>L4</b> | <i>t</i> -BuOK | 0                      | 11              | <b>L6</b> | Et <sub>3</sub> N <sup>d</sup>              | 0                      |
| 5              | <b>L5</b> | <i>t</i> -BuOK | 58                     | 12              | <b>L6</b> | <i>t</i> -BuOLi                             | 37                     |
| 6 <sup>c</sup> | <b>L5</b> | <i>t</i> -BuOK | 70                     | <b>13</b>       | <b>L6</b> | <b><i>t</i>-BuONa</b>                       | <b>96</b>              |
| 7              | <b>L6</b> | <i>t</i> -BuOK | 70                     | 14 <sup>e</sup> | <b>L6</b> | <i>t</i> -BuONa                             | 0                      |

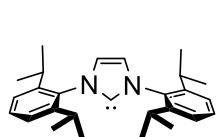

**L1**, IPr

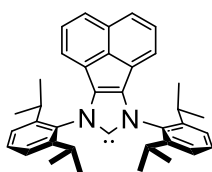

**L2**

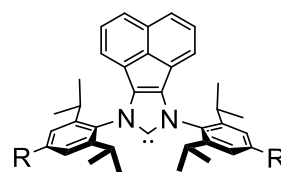

**L3**, R = CH(Ph)<sub>2</sub>

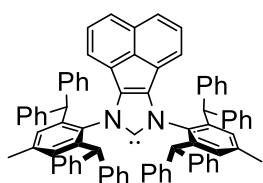

**L4**

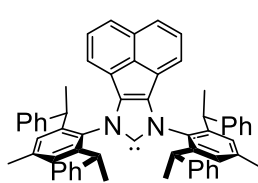

**L5**, (*R,R,R,R*)-ANIPE

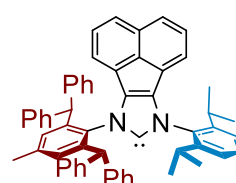

**L6**

<sup>a</sup> Reactions were performed on a 0.2-mmol scale. <sup>b</sup> Determined by NMR analysis using 1,3,5-trimethyl-benzene as an internal standard. <sup>c</sup> 50 °C. <sup>d</sup> 5.0 mol% *t*-BuOK was added. <sup>e</sup> Without Ni(COD)<sub>2</sub> or **L6**.

**Table 2.** Solvent Screening<sup>a</sup>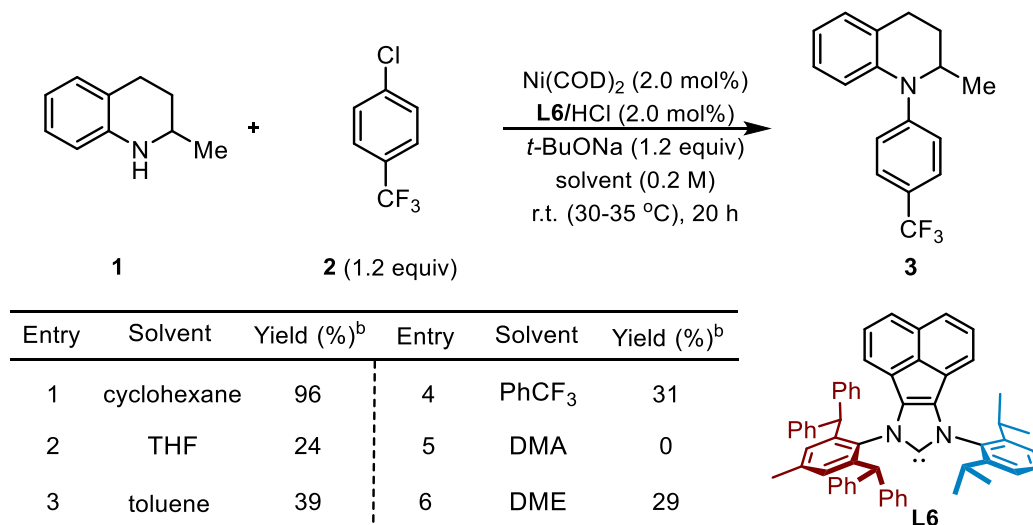

<sup>a</sup> Reactions were performed on a 0.2-mmol scale. <sup>b</sup> Determined by NMR analysis using 1,3,5-trimethyl-benzene as an internal standard.

**Table 3.** Other Ligands<sup>a</sup>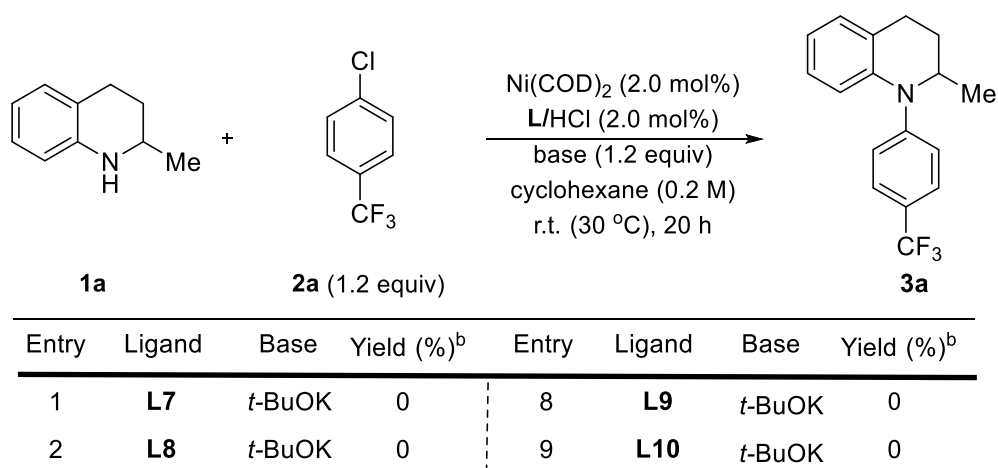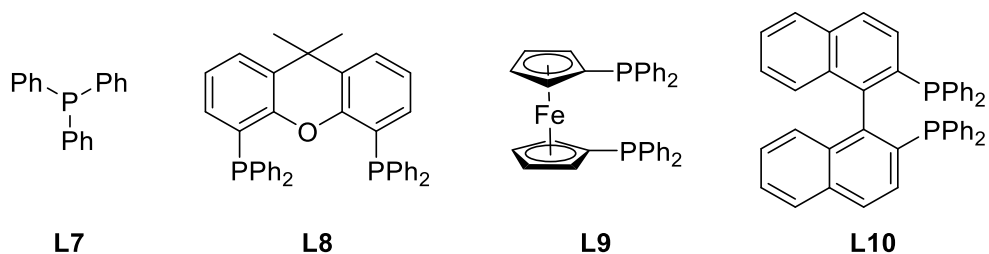

<sup>a</sup> Reactions were performed on a 0.2-mmol scale. <sup>b</sup> Determined by NMR analysis using 1,3,5-trimethyl-benzene as an internal standard.

## Nickel/NHC-Catalyzed Arylation of Sterically Hindered Amines

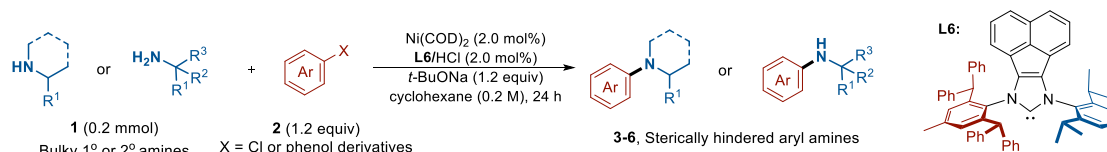

**General Procedure:** In a nitrogen-filled glove box, an oven-dried screw-cap reaction tube equipped with a magnetic stir bar was charged with Ni(COD)<sub>2</sub> (1.1 mg, 4 μmol, 2 mol%), L6/HCl (3.3 mg, 4 μmol, 2 mol%), *t*-BuONa (23 mg, 0.24 mmol, 1.2 equiv) and cyclohexane (1.0 ml, 0.2 M). The reaction tube was sealed with a screw-cap septum and stirred at room temperature (r.t.) for 20 min until the color turned brown. The amine (0.2 mmol) and aryl chloride (0.24 mmol, 1.2 equiv) were then added. The reaction tube was wrapped with electrical tape and removed from the glove box. The reaction mixture was stirred within the sealed tube at temperature as indicated for each compound for 24 h, followed by adding a saturated aqueous solution of NaCl (2.0 mL) and EtOAc (2.0 mL). The phases were separated, and the aqueous layer was extracted with EtOAc (2 x 5.0 mL). The combined organic phases were washed with a saturated aqueous solution of NaCl (2 x 10 mL) and then concentrated in vacuo. The crude residue was purified via column chromatography to afford the desired product.

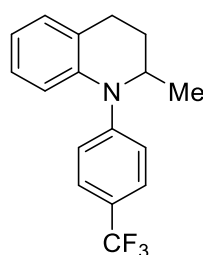

### 2-methyl-1-(4-(trifluoromethyl)phenyl)-1,2,3,4-tetrahydroquinoline (3a)<sup>[1]</sup>

Following the General Procedure using 1,2,3,4-tetrahydro-2-methylquinoline (29.4 mg, 0.2 mmol, 1.0 equiv) and 4-chlorobenzotrifluoride (43.3 mg, 0.24 mmol, 1.2 equiv), the reaction mixture was stirred at r.t. for 24 h. The crude product was purified by column chromatography (0-2% EtOAc in hexanes) to provide the title compound as a yellow oil in 94% yield (55 mg).

<sup>1</sup>H NMR (400 MHz, CDCl<sub>3</sub>) δ 7.5 (d, *J* = 8.5 Hz, 2H), 7.3 (d, *J* = 8.4 Hz, 2H), 7.1 (d, *J* = 7.3

Hz, 1H), 7.0 (m, 1H), 6.9 (m, 1H), 6.8 (m, 1H), 4.1 (m, 1H), 2.9 (m, 1H), 2.8 (m, 1H), 2.1 (m, 1H), 1.8 (m, 1H), 1.3 (d,  $J = 6.6$  Hz, 3H).  $^{13}\text{C}$  NMR (101 MHz,  $\text{CDCl}_3$ )  $\delta$  151.2, 141.8, 129.6, 126.6 (q,  $J = 4.0$  Hz), 126.5, 126.1, 124.6 (q,  $J = 272.7$  Hz), 124.0 (q,  $J = 33.3$  Hz), 122.9, 120.1, 118.7, 54.1, 28.5, 23.8, 19.1.  $^{19}\text{F}$  NMR (376 MHz,  $\text{CDCl}_3$ )  $\delta$  -61.2.

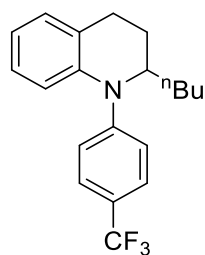

### 2-butyl-1-(4-(trifluoromethyl)phenyl)-1,2,3,4-tetrahydroquinoline (3b) <sup>[1]</sup>

Following the General Procedure using 2-butyl-1,2,3,4-tetrahydroquinoline (37.9 mg, 0.2 mmol, 1.0 equiv) and 4-chlorobenzotrifluoride (43.3 mg, 0.24 mmol, 1.2 equiv), the reaction mixture was stirred at r.t. for 24 h. The crude product was purified by column chromatography (0-2% EtOAc in hexanes) to provide the title compound as a yellow oil in 98% yield (65 mg).

$^1\text{H}$  NMR (400 MHz,  $\text{CDCl}_3$ )  $\delta$  7.5 (d,  $J = 8.6$  Hz, 2H), 7.2 (d,  $J = 8.5$  Hz, 2H), 7.1 (d,  $J = 7.4$  Hz, 1H), 7.0 (m, 2H), 6.9 (m, 1H), 3.9 (m, 1H), 2.8 (m, 2H), 2.0 (m, 1H), 1.9 (m, 1H), 1.7 (m, 1H), 1.4 (m, 5H), 0.9 (t,  $J = 7.2$  Hz, 3H).  $^{13}\text{C}$  NMR (101 MHz,  $\text{CDCl}_3$ )  $\delta$  152.4, 141.2, 129.7, 127.5, 126.4 (q,  $J = 4.0$  Hz), 126.4, 124.7 (q,  $J = 271.7$  Hz), 122.9 (q,  $J = 32.3$  Hz), 121.3, 121.1, 121.1, 59.2, 31.7, 28.9, 25.2, 23.3, 22.9, 14.3.  $^{19}\text{F}$  NMR (376 MHz,  $\text{CDCl}_3$ )  $\delta$  -61.6.

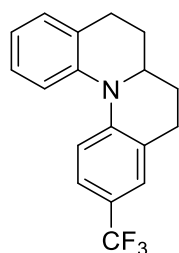

### 3-(trifluoromethyl)-6,6a,7,8-tetrahydro-5H-quinolino[1,2-a]quinolone (3c)

Following the General Procedure using 2-(2-chloro-5-(trifluoromethyl)phenethyl)-1,2,3,4-tetrahydroquinoline (68.0 mg, 0.2 mmol, 1.0 equiv), the reaction mixture was stirred at r.t. for 24 h. The crude product was purified by column chromatography (0-2% EtOAc in hexanes) to

provide the title compound as a yellow oil in 95% yield (58 mg).

$^1\text{H}$  NMR (400 MHz,  $\text{CDCl}_3$ )  $\delta$  7.3 (m, 3H), 7.2 (m, 1H), 7.1 (d,  $J = 7.5$  Hz, 1H), 7.0 (m, 1H), 6.9 (t,  $J = 7.4$  Hz, 1H), 3.5 (m, 1H), 2.8 (m, 4H), 2.3 (m, 1H), 2.2 (m, 1H), 1.6 (m, 2H).  $^{13}\text{C}$  NMR (101 MHz,  $\text{CDCl}_3$ )  $\delta$  145.6, 141.7, 129.6, 129.3, 128.8, 126.1, 125.9 (q,  $J = 4.0$  Hz), 124.9 (q,  $J = 272.7$  Hz), 123.5 (q,  $J = 4.0$  Hz), 121.4, 121.0 (q,  $J = 32.3$  Hz), 119.3, 117.3, 56.0, 31.0, 30.8, 27.4, 27.2.  $^{19}\text{F}$  NMR (376 MHz,  $\text{CDCl}_3$ )  $\delta$  -61.4. IR (neat,  $\text{cm}^{-1}$ ) 2927, 1736, 1505, 1310, 1111, 751. HRMS (EI) calculated for  $\text{C}_{18}\text{H}_{16}\text{F}_3\text{N}$   $[\text{M}]^+$   $m/z$  303.1229, found 303.1225.

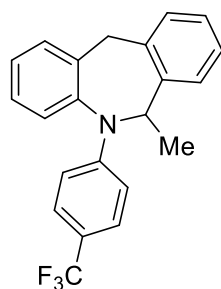

**6-methyl-5-(4-(trifluoromethyl)phenyl)-6,11-dihydro-5H-dibenzo[b,e]azepine (3d)**

[1]

Following the General Procedure using 6-methyl-6,11-dihydro-5H-dibenzo[b,e]azepine (41.9 mg, 0.2 mmol, 1.0 equiv) and 4-chlorobenzotrifluoride (43.3 mg, 0.24 mmol, 1.2 equiv), the reaction mixture was stirred at 80 °C for 24 h. The crude product was purified by column chromatography (0-2% EtOAc in hexanes) to provide the title compound as a yellow oil in 96% yield (68 mg).

$^1\text{H}$  NMR (400 MHz,  $\text{CDCl}_3$ )  $\delta$  7.3 (m, 6H), 7.2 (m, 2H), 7.1 (m, 2H), 6.7 (d,  $J = 8.7$  Hz, 2H), 5.4 (m, 1H), 4.1 (d,  $J = 15.6$  Hz, 1H), 3.5 (d,  $J = 15.7$  Hz, 1H), 1.3 (d,  $J = 7.0$  Hz, 3H).  $^{13}\text{C}$  NMR (101 MHz,  $\text{CDCl}_3$ )  $\delta$  150.9, 141.4, 141.2, 140.7, 134.3, 131.5, 130.8, 130.4, 129.3, 128.2, 127.9, 127.1, 126.9, 126.6 (q,  $J = 4.0$  Hz), 125.1 (q,  $J = 271.7$  Hz), 119.3 (q,  $J = 33.3$  Hz), 112.5, 55.0, 40.1, 25.4.  $^{19}\text{F}$  NMR (376 MHz,  $\text{CDCl}_3$ )  $\delta$  -61.0.

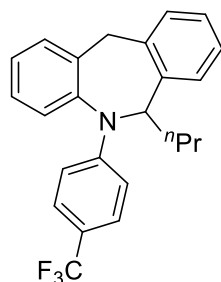

**6-isopropyl-5-(4-(trifluoromethyl)phenyl)-6,11-dihydro-5H-dibenzo[b,e]azepine (3e)**

Following the General Procedure using 6-propyl-6,11-dihydro-5H-dibenzo[b,e]azepine (47.4 mg, 0.2 mmol, 1.0 equiv) and 4-chlorobenzotrifluoride (43.3 mg, 0.24 mmol, 1.2 equiv), the reaction mixture was stirred at 80 °C for 24 h. The crude product was purified by column chromatography (0-2% EtOAc in hexanes) to provide the title compound as a yellow oil in 77% yield (59 mg).

<sup>1</sup>H NMR (400 MHz, CDCl<sub>3</sub>) δ 7.4 (d, *J* = 7.1 Hz, 1H), 7.3 (m, 5H), 7.2 (m, 2H), 7.1 (m, 2H), 6.7 (d, *J* = 8.6 Hz, 2H), 5.2 (m, 1H), 4.1 (d, *J* = 15.8 Hz, 1H), 3.5 (d, *J* = 15.9 Hz, 1H), 1.6 (m, 1H), 1.5 (m, 3H), 0.9 (t, *J* = 7.0 Hz, 3H). <sup>13</sup>C NMR (101 MHz, CDCl<sub>3</sub>) δ 151.5, 141.2, 140.7, 140.6, 134.4, 130.8, 130.7, 130.6, 129.8, 128.2, 127.8, 127.1, 126.7, 126.6 (q, *J* = 4.0 Hz), 125.1 (q, *J* = 271.7 Hz), 119.1 (q, *J* = 32.3 Hz), 112.4, 60.1, 41.0, 40.3, 20.2, 13.9. <sup>19</sup>F NMR (376 MHz, CDCl<sub>3</sub>) δ -61.0. IR (neat, cm<sup>-1</sup>) 2959, 1737, 1616, 1324, 1254, 1110. HRMS (EI) calculated for C<sub>24</sub>H<sub>22</sub>F<sub>3</sub>N [M]<sup>+</sup> *m/z* 381.1699, found 381.1707.

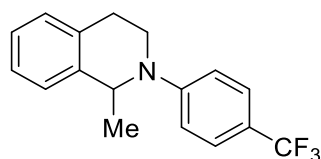

**1-methyl-2-(4-(trifluoromethyl)phenyl)-1,2,3,4-tetrahydroisoquinoline (3f)**

Following the General Procedure using 1-methyl-1,2,3,4-tetrahydroisoquinoline (29.4 mg, 0.2 mmol, 1.0 equiv) and 4-chlorobenzotrifluoride (43.3 mg, 0.24 mmol, 1.2 equiv), the reaction mixture was stirred at 80 °C for 24 h. The crude product was purified by column chromatography (0-2% EtOAc in hexanes) to provide the title compound as a yellow oil in 86% yield (58 mg).

<sup>1</sup>H NMR (400 MHz, CDCl<sub>3</sub>) δ 7.5 (d, *J* = 8.8 Hz, 2H), 7.2 (m, 4H), 6.9 (d, *J* = 8.8 Hz, 2H), 5.0



(q,  $J = 6.7$  Hz, 1H), 3.7 (m, 1H), 3.6 (m, 1H), 3.0 (m, 2H), 1.5 (d,  $J = 6.7$  Hz, 3H).  $^{13}\text{C}$  NMR (101 MHz,  $\text{CDCl}_3$ )  $\delta$  151.2, 139.5, 134.4, 128.6, 126.8, 126.8, 126.7 (q,  $J = 4.0$  Hz), 125.2 (q,  $J = 271.7$  Hz), 126.5, 118.2 (q,  $J = 33.3$  Hz), 112.3, 54.1, 41.4, 28.5, 21.3.  $^{19}\text{F}$  NMR (376 MHz,  $\text{CDCl}_3$ )  $\delta$  -60.9. IR (neat,  $\text{cm}^{-1}$ ) 2959, 1708, 1638, 1375, 1154, 885. HRMS (ESI) calculated for  $\text{C}_{17}\text{H}_{17}\text{F}_3\text{N}$   $[\text{M}+\text{H}]^+$   $m/z$  292.1308, found 292.1314.

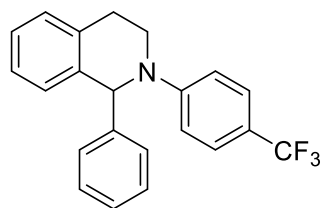

### 1-phenyl-2-(4-(trifluoromethyl)phenyl)-1,2,3,4-tetrahydroisoquinoline (3g)<sup>[1]</sup>

Following the General Procedure using 1-phenyl-1,2,3,4-tetrahydroisoquinoline (41.8 mg, 0.2 mmol, 1.0 equiv) and 4-chlorobenzotrifluoride (43.3 mg, 0.24 mmol, 1.2 equiv), the reaction mixture was stirred at 50 °C for 24 h. The crude product was purified by column chromatography (0-2% EtOAc in hexanes) to provide the title compound as a yellow oil in 94% yield (66 mg).

$^1\text{H}$  NMR (400 MHz,  $\text{CDCl}_3$ )  $\delta$  7.4 (d,  $J = 8.7$  Hz, 2H), 7.3 (m, 1H), 7.2 (m, 8H), 6.8 (d,  $J = 8.8$  Hz, 2H), 5.9 (s, 1H), 3.8 (m, 1H), 3.5 (m, 1H), 2.9 (m, 2H).  $^{13}\text{C}$  NMR (101 MHz,  $\text{CDCl}_3$ )  $\delta$  151.5, 142.1, 137.7, 135.6, 128.6, 128.1, 127.7, 127.6, 127.2, 126.9, 126.64, 126.62, 126.6 (q,  $J = 4.0$  Hz), 126.5 (q,  $J = 271.7$  Hz), 112.2, 62.5, 44.3, 28.1.  $^{19}\text{F}$  NMR (376 MHz,  $\text{CDCl}_3$ )  $\delta$  -60.8.

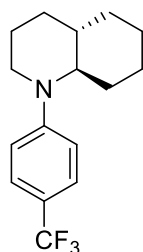

### *trans*-1-(4-(trifluoromethyl)phenyl)decahydroquinoline (3h)<sup>[1]</sup>

Following the General Procedure using (4a*S*,8a*R*)-decahydroquinoline (27.8 mg, 0.2 mmol, 1.0 equiv) and 4-chlorobenzotrifluoride (43.3 mg, 0.24 mmol, 1.2 equiv), the reaction mixture was

stirred at 50 °C for 24 h. The crude product was purified by column chromatography (0-2% EtOAc in hexanes) to provide the title compound as a yellow oil in 99% yield (56 mg).

<sup>1</sup>H NMR (400 MHz, CDCl<sub>3</sub>) δ 7.4 (d, *J* = 8.4 Hz, 2H), 7.1 (d, *J* = 8.2 Hz, 2H), 3.1 (m, 1H), 2.7 (m, 1H), 2.4 (m, 1H), 1.6 (m, 7H), 1.3 (m, 1H), 1.2 (m, 2H), 1.0 (m, 3H). <sup>13</sup>C NMR (101 MHz, CDCl<sub>3</sub>) δ 155.7, 126.0 (q, *J* = 4.0 Hz), 125.5 (q, *J* = 33.3 Hz), 124.6 (q, *J* = 272.7 Hz), 124.4, 65.1, 56.4, 42.2, 33.2, 31.8, 31.4, 26.3, 26.1, 25.5. <sup>19</sup>F NMR (376 MHz, CDCl<sub>3</sub>) δ -61.9. IR (neat, cm<sup>-1</sup>) 2926, 1737, 1613, 1325, 1122, 1068. HRMS (ESI) calculated for C<sub>16</sub>H<sub>21</sub>F<sub>3</sub>N [M+H]<sup>+</sup> *m/z* 284.1621, found 284.1629.

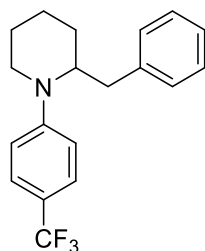

### 2-benzyl-1-(4-(trifluoromethyl)phenyl)piperidine (3i)

Following the General Procedure using 2-benzylpiperidine (36.0 mg, 0.2 mmol, 1.0 equiv) and 4-chlorobenzotrifluoride (43.3 mg, 0.24 mmol, 1.2 equiv), the reaction mixture was stirred at 80 °C for 24 h. The crude product was purified by column chromatography (0-2% EtOAc in hexanes) to provide the title compound as a yellow oil in 81% yield (54 mg).

<sup>1</sup>H NMR (400 MHz, CDCl<sub>3</sub>) δ 7.5 (m, 2H), 7.3 (m, 2H), 7.2 (m, 3H), 6.9 (d, *J* = 8.8 Hz, 2H), 4.2 (m, 1H), 3.6 (m, 1H), 3.1 (m, 1H), 2.9 (m, 1H), 2.7 (m, 1H), 1.7 (m, 6H). <sup>13</sup>C NMR (101 MHz, CDCl<sub>3</sub>) δ 153.0, 139.6, 129.2, 128.7, 126.6 (q, *J* = 4.0 Hz), 125.1 (q, *J* = 271.7 Hz), 119.2 (q, *J* = 33.3 Hz), 126.3, 114.4, 57.2, 42.6, 33.6, 26.3, 25.5, 18.7. <sup>19</sup>F NMR (376 MHz, CDCl<sub>3</sub>) δ -61.1. IR (neat, cm<sup>-1</sup>) 2931, 1614, 1522, 1328, 1254, 1110. HRMS (ESI) calculated for C<sub>19</sub>H<sub>21</sub>F<sub>3</sub>N [M+H]<sup>+</sup> *m/z* 320.1621, found 320.1628.

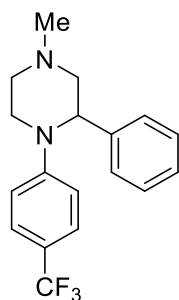

### 4-methyl-2-phenyl-1-(4-(trifluoromethyl)phenyl)piperazine (3j)

Following the General Procedure using 1-methyl-3-phenylpiperazine (35.2 mg, 0.2 mmol, 1.0 equiv) and 4-chlorobenzotrifluoride (43.3 mg, 0.24 mmol, 1.2 equiv), the reaction mixture was stirred at 80 °C for 24 h. The crude product was purified by column chromatography (5-10% EtOAc in hexanes) to provide the title compound as a yellow oil in 88% yield (56 mg).

$^1\text{H}$  NMR (400 MHz,  $\text{CDCl}_3$ )  $\delta$  7.4 (m, 2H), 7.2 (m, 4H), 7.2 (m, 1H), 6.9 (m, 2H), 4.6 (m, 1H), 3.6 (m, 1H), 3.4 (m, 1H), 2.7 (m, 3H), 2.6 (m, 1H), 2.3 (s, 3H).  $^{13}\text{C}$  NMR (101 MHz,  $\text{CDCl}_3$ )  $\delta$  153.4, 140.8, 128.6, 127.5, 127.1, 126.2 (q,  $J = 4.0$  Hz), 124.8 (q,  $J = 271.7$  Hz), 121.4 (q,  $J = 33.3$  Hz), 117.9, 62.1, 59.7, 55.4, 49.5, 46.3.  $^{19}\text{F}$  NMR (376 MHz,  $\text{CDCl}_3$ )  $\delta$  -61.5. IR (neat,  $\text{cm}^{-1}$ ) 2939, 1614, 1452, 1328, 1112, 700. HRMS (ESI) calculated for  $\text{C}_{18}\text{H}_{20}\text{F}_3\text{N}_2$   $[\text{M}+\text{H}]^+$   $m/z$  321.1573, found 321.1581.

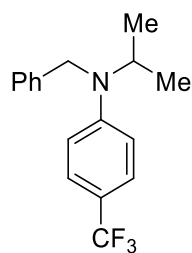

### N-benzyl-N-isopropyl-4-(trifluoromethyl)aniline (3k)

Following the General Procedure using N-benzylpropan-2-amine (29.8 mg, 0.2 mmol, 1.0 equiv) and 4-chlorobenzotrifluoride (43.3 mg, 0.24 mmol, 1.2 equiv), the reaction mixture was stirred at 80 °C for 24 h. The crude product was purified by column chromatography (0-2% EtOAc in hexanes) to provide the title compound as a yellow oil in 55% yield (32 mg).

$^1\text{H}$  NMR (400 MHz,  $\text{CDCl}_3$ )  $\delta$  7.4 (m, 2H), 7.3 (m, 2H), 7.2 (m, 3H), 6.7 (d,  $J = 8.8$  Hz, 2H), 4.5 (s, 2H), 4.3 (m, 1H), 1.2 (d,  $J = 6.6$  Hz, 6H).  $^{13}\text{C}$  NMR (101 MHz,  $\text{CDCl}_3$ )  $\delta$  151.5, 139.6, 128.8, 126.9, 126.6 (q,  $J = 271.7$  Hz), 126.5 (q,  $J = 4.0$  Hz), 126.2, 117.8 (q,  $J = 32.3$  Hz), 112.2,

48.5, 48.2, 20.0.  $^{19}\text{F}$  NMR (376 MHz,  $\text{CDCl}_3$ )  $\delta$  -60.9. IR (neat,  $\text{cm}^{-1}$ ) 2974, 1737, 1614, 1325, 1108, 726. HRMS (ESI) calculated for  $\text{C}_{17}\text{H}_{19}\text{F}_3\text{N}$   $[\text{M}+\text{H}]^+$   $m/z$  294.1464, found 294.1471.

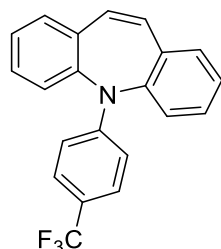

### 5-(4-(trifluoromethyl)phenyl)-5H-dibenzo[b,f]azepine (3l)

Following the General Procedure using 5H-dibenzo[b,f]azepine (38.6 mg, 0.2 mmol, 1.0 equiv) and 4-chlorobenzotrifluoride (43.3 mg, 0.24 mmol, 1.2 equiv), the reaction mixture was stirred at 80 °C for 24 h. The crude product was purified by column chromatography (0-2% EtOAc in hexanes) to provide the title compound as a yellow oil in 64% yield (43 mg).

$^1\text{H}$  NMR (400 MHz,  $\text{CDCl}_3$ )  $\delta$  7.5 (m, 6H), 7.4 (m, 2H), 7.2 (m, 2H), 6.8 (s, 2H), 6.3 (m, 2H).  $^{13}\text{C}$  NMR (101 MHz,  $\text{CDCl}_3$ )  $\delta$  151.4, 142.2, 136.1, 130.7, 130.6, 130.1, 130.1, 127.7, 126.0 (q,  $J = 4.0$  Hz), 125.0 (q,  $J = 270.7$  Hz), 119.9 (q,  $J = 32.3$  Hz), 111.5.  $^{19}\text{F}$  NMR (376 MHz,  $\text{CDCl}_3$ )  $\delta$  -61.1. IR (neat,  $\text{cm}^{-1}$ ) 2926, 1736, 1613, 1316, 1236, 1044. HRMS (EI) calculated for  $\text{C}_{21}\text{H}_{14}\text{F}_3\text{N}$   $[\text{M}]^+$   $m/z$  337.1073, found 337.1081.

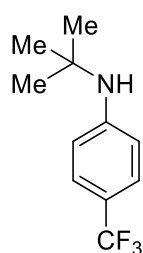

### N-(tert-butyl)-4-(trifluoromethyl)aniline (3m) <sup>[2]</sup>

Following the General Procedure using 2-methylpropan-2-amine (14.6 mg, 0.2 mmol, 1.0 equiv) and 4-chlorobenzotrifluoride (43.3 mg, 0.24 mmol, 1.2 equiv), the reaction mixture was stirred at 50 °C for 24 h. The crude product was purified by column chromatography (0-2% EtOAc in hexanes) to provide the title compound as a yellow oil in 70% yield (30 mg).

$^1\text{H}$  NMR (400 MHz,  $\text{CDCl}_3$ )  $\delta$  7.4 (d,  $J = 8.6$  Hz, 2H), 6.7 (d,  $J = 8.5$  Hz, 2H), 1.4 (s, 9H).  $^{13}\text{C}$

NMR (101 MHz, CDCl<sub>3</sub>)  $\delta$  149.4, 126.4 (q,  $J = 4.0$  Hz), 126.5 (q,  $J = 271.7$  Hz), 114.7, 51.6, 29.7. <sup>19</sup>F NMR (376 MHz, CDCl<sub>3</sub>)  $\delta$  -61.1.

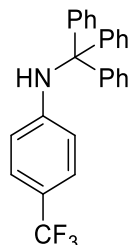

#### 4-(trifluoromethyl)-N-tritylaniline (3n) <sup>[3]</sup>

Following the General Procedure using triphenylmethanamine (51.8 mg, 0.2 mmol, 1.0 equiv) and 4-chlorobenzotrifluoride (43.3 mg, 0.24 mmol, 1.2 equiv), the reaction mixture was stirred at 80 °C for 24 h. The crude product was purified by column chromatography (0-2% EtOAc in hexanes) to provide the title compound as a yellow oil in 78% yield (63 mg).

<sup>1</sup>H NMR (400 MHz, CDCl<sub>3</sub>)  $\delta$  7.3 (m, 15H), 7.2 (d,  $J = 8.5$  Hz, 2H), 6.4 (d,  $J = 8.4$  Hz, 2H), 5.4 (s, 1H). <sup>13</sup>C NMR (101 MHz, CDCl<sub>3</sub>)  $\delta$  149.1, 144.8, 129.2, 128.3, 127.3, 125.7 (q,  $J = 4.0$  Hz), 125.0 (q,  $J = 271.7$  Hz), 119.0 (q,  $J = 33.3$  Hz), 115.3, 71.5. <sup>19</sup>F NMR (376 MHz, CDCl<sub>3</sub>)  $\delta$  -61.1.

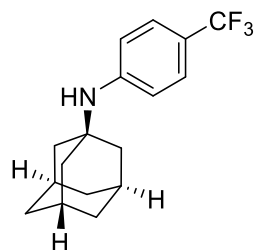

#### (3s,5s,7s)-N-(4-(trifluoromethyl)phenyl)adamantan-1-amine (3o) <sup>[4]</sup>

Following the General Procedure using (3s,5s,7s)-adamantan-1-amine (30.2 mg, 0.2 mmol, 1.0 equiv) and 4-chlorobenzotrifluoride (43.3 mg, 0.24 mmol, 1.2 equiv), the reaction mixture was stirred at 50 °C for 24 h. The crude product was purified by column chromatography (0-2% EtOAc in hexanes) to provide the title compound as a yellow oil in 77% yield (46 mg).

<sup>1</sup>H NMR (400 MHz, CDCl<sub>3</sub>)  $\delta$  7.4 (d,  $J = 8.5$  Hz, 2H), 6.8 (d,  $J = 8.4$  Hz, 2H), 2.1 (m, 3H), 2.0 (d,  $J = 2.9$  Hz, 6H), 1.7 (d,  $J = 14.7$  Hz, 6H). <sup>13</sup>C NMR (101 MHz, CDCl<sub>3</sub>)  $\delta$  149.1, 126.3 (q,  $J$

= 4.0 Hz), 125.1 (q,  $J = 271.7$  Hz), 119.1 (q,  $J = 32.3$  Hz), 115.6, 52.4, 42.8, 36.5, 29.7.  $^{19}\text{F}$  NMR (376 MHz,  $\text{CDCl}_3$ )  $\delta$  -61.1.

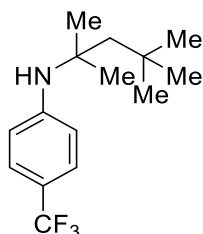

#### 4-(trifluoromethyl)-N-(2,4,4-trimethylpentan-2-yl)aniline (3p)

Following the General Procedure using 2,4,4-trimethylpentan-2-amine (25.8 mg, 0.2 mmol, 1.0 equiv) and 4-chlorobenzotrifluoride (43.3 mg, 0.24 mmol, 1.2 equiv), the reaction mixture was stirred at 80 °C for 24 h. The crude product was purified by column chromatography (0-2% EtOAc in hexanes) to provide the title compound as a yellow oil in 81% yield (44 mg).

$^1\text{H}$  NMR (400 MHz,  $\text{CDCl}_3$ )  $\delta$  7.4 (m, 2H), 6.6 (m, 2H), 4.0 (s, 1H), 1.7 (s, 2H), 1.4 (s, 6H), 1.0 (s, 9H).  $^{13}\text{C}$  NMR (101 MHz,  $\text{CDCl}_3$ )  $\delta$  149.7, 126.4 (q,  $J = 4.0$  Hz), 125.2 (q,  $J = 270.7$  Hz), 118.0 (q,  $J = 32.3$  Hz), 114.2, 55.3, 52.3, 32.0, 31.7, 30.5.  $^{19}\text{F}$  NMR (376 MHz,  $\text{CDCl}_3$ )  $\delta$  -60.9. IR (neat,  $\text{cm}^{-1}$ ) 2954, 1616, 1325, 1110, 1068, 824. HRMS (ESI) calculated for  $\text{C}_{15}\text{H}_{23}\text{F}_3\text{N}$   $[\text{M}+\text{H}]^+$   $m/z$  274.1777, found 274.1787.

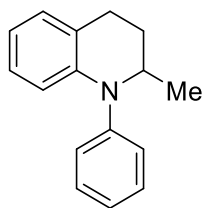

#### 2-methyl-1-phenyl-1,2,3,4-tetrahydroquinoline (4a)<sup>[1]</sup>

Following the General Procedure using 1,2,3,4-tetrahydro-2-methylquinoline (29.4 mg, 0.2 mmol, 1.0 equiv) and chlorobenzene (26.9 mg, 0.24 mmol, 1.2 equiv), the reaction mixture was stirred at 80 °C for 24 h. The crude product was purified by column chromatography (0-2% EtOAc in hexanes) to provide the title compound as a yellow oil in 90% yield (40 mg).

$^1\text{H}$  NMR (400 MHz,  $\text{CDCl}_3$ )  $\delta$  7.4 (m, 2H), 7.2 (m, 2H), 7.1 (m, 1H), 7.0 (m, 1H), 6.9 (m, 1H), 6.6 (m, 1H), 6.5 (m, 1H), 3.9 (m, 1H), 2.9 (m, 2H), 2.1 (m, 1H), 1.8 (m, 1H), 1.1 (d,  $J = 6.5$  Hz, 3H).  $^{13}\text{C}$  NMR (101 MHz,  $\text{CDCl}_3$ )  $\delta$  147.5, 144.3, 129.6, 129.3, 127.1, 126.5, 124.7, 123.2, 117.5,

115.9, 54.3, 28.5, 24.4, 19.8.

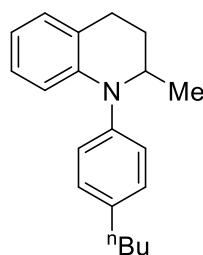

### 1-(4-butylphenyl)-2-methyl-1,2,3,4-tetrahydroquinoline (4b)

Following the General Procedure using 1,2,3,4-tetrahydro-2-methylquinoline (29.4 mg, 0.2 mmol, 1.0 equiv) and 1-butyl-4-chlorobenzene (40.3 mg, 0.24 mmol, 1.2 equiv), the reaction mixture was stirred at 80 °C for 24 h. The crude product was purified by column chromatography (0-2% EtOAc in hexanes) to provide the title compound as a yellow oil in 94% yield (53 mg).

<sup>1</sup>H NMR (400 MHz, CDCl<sub>3</sub>) δ 7.2 (d, *J* = 8.2 Hz, 2H), 7.1 (d, *J* = 8.4 Hz, 2H), 7.0 (m, 1H), 6.9 (m, 1H), 6.6 (m, 1H), 6.4 (m, 1H), 3.9 (m, 1H), 2.9 (m, 2H), 2.6 (m, 2H), 2.1 (m, 1H), 1.9 (m, 1H), 1.6 (m, 2H), 1.4 (m, 2H), 1.2 (d, *J* = 6.5 Hz, 3H), 1.0 (t, *J* = 7.3 Hz, 3H). <sup>13</sup>C NMR (101 MHz, CDCl<sub>3</sub>) δ 144.9, 144.8, 139.7, 129.6, 129.2, 127.5, 126.5, 122.6, 117.0, 115.3, 54.3, 35.3, 33.8, 28.6, 24.5, 22.6, 20.0, 14.1. IR (neat, cm<sup>-1</sup>): 2926, 1739, 1508, 1491, 1375, 1287, 1209. HRMS (ESI) calculated for C<sub>20</sub>H<sub>26</sub>N [M+H]<sup>+</sup> *m/z* 280.2060, found 280.2068.

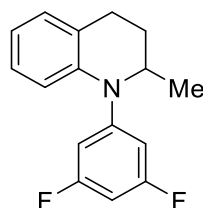

### 1-(3,5-difluorophenyl)-2-methyl-1,2,3,4-tetrahydroquinoline (4c) <sup>[1]</sup>

Following the General Procedure using 1,2,3,4-tetrahydro-2-methylquinoline (29.4 mg, 0.2 mmol, 1.0 equiv) and 1-chloro-3,5-difluorobenzene (35.5 mg, 0.24 mmol, 1.2 equiv), the reaction mixture was stirred at r.t. for 24 h. The crude product was purified by column chromatography (0-2% EtOAc in hexanes) to provide the title compound as a yellow oil in 81% yield (42 mg).

$^1\text{H}$  NMR (400 MHz,  $\text{CDCl}_3$ )  $\delta$  7.1 (d,  $J = 7.4$  Hz, 1H), 7.0 (t,  $J = 7.7$  Hz, 1H), 6.9 (d,  $J = 8.2$  Hz, 1H), 6.8 (t,  $J = 7.4$  Hz, 1H), 6.7 (m, 2H), 6.4 (m, 1H), 4.0 (m, 1H), 2.8 (m, 2H), 2.1 (m, 1H), 1.8 (m, 1H), 1.2 (d,  $J = 6.6$  Hz, 3H).  $^{13}\text{C}$  NMR (101 MHz,  $\text{CDCl}_3$ )  $\delta$  163.9 (dd,  $J = 246.4$  Hz,  $J = 15.2$  Hz), 150.7 (t,  $J = 13.1$  Hz), 141.5, 129.5, 126.6, 126.5, 120.4, 119.3, 105.6 (m), 97.7 (t,  $J = 6.1$  Hz), 54.3, 28.7, 23.8, 19.1.  $^{19}\text{F}$  NMR (376 MHz,  $\text{CDCl}_3$ )  $\delta$  -110.0.

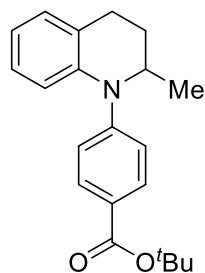

**tert-butyl 4-(2-methyl-3,4-dihydroquinolin-1(2H)-yl)benzoate (4d)**<sup>[1]</sup>

Following the General Procedure using 1,2,3,4-tetrahydro-2-methylquinoline (29.4 mg, 0.2 mmol, 1.0 equiv) and tert-butyl 4-chlorobenzoate (50.9 mg, 0.24 mmol, 1.2 equiv), the reaction mixture was stirred at 80 °C for 24 h. The crude product was purified by column chromatography (5-10% EtOAc in hexanes) to provide the title compound as a yellow oil in 75% yield (48 mg).

$^1\text{H}$  NMR (400 MHz,  $\text{CDCl}_3$ )  $\delta$  7.9 (d,  $J = 8.8$  Hz, 2H), 7.2 (d,  $J = 8.8$  Hz, 2H), 7.1 (d,  $J = 7.3$  Hz, 1H), 7.0 (m, 2H), 6.8 (m, 1H), 4.1 (m, 1H), 2.8 (m, 2H), 2.1 (m, 1H), 1.8 (m, 1H), 1.6 (s, 9H), 1.3 (d,  $J = 6.6$  Hz, 3H).  $^{13}\text{C}$  NMR (101 MHz,  $\text{CDCl}_3$ )  $\delta$  165.7, 151.9, 141.5, 130.9, 129.5, 126.4, 126.4, 125.2, 121.6, 120.2, 119.1, 80.5, 53.9, 28.6, 28.4, 23.7, 19.0.

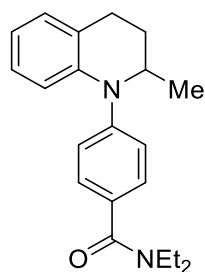

**N,N-diethyl-4-(2-methyl-3,4-dihydroquinolin-1(2H)-yl)benzamide (4e)**<sup>[1]</sup>

Following the General Procedure using 1,2,3,4-tetrahydro-2-methylquinoline (29.4 mg, 0.2 mmol, 1.0 equiv) and 4-chloro-N,N-diethylbenzamide (50.6 mg, 0.24 mmol, 1.2 equiv), the



reaction mixture was stirred at 80 °C for 24 h. The crude product was purified by column chromatography (10-20% EtOAc in hexanes) to provide the title compound as a yellow oil in 64% yield (42 mg).

$^1\text{H}$  NMR (400 MHz,  $\text{CDCl}_3$ )  $\delta$  7.4 (d,  $J = 8.0$  Hz, 2H), 7.2 (d,  $J = 8.5$  Hz, 2H), 7.1 (d,  $J = 7.8$  Hz, 1H), 6.9 (t,  $J = 7.7$  Hz, 1H), 6.7 (m, 2H), 4.0 (m, 1H), 3.5 (m, 4H), 2.9 (m, 2H), 2.1 (m, 1H), 1.8 (m, 1H), 1.2 (m, 9H).  $^{13}\text{C}$  NMR (101 MHz,  $\text{CDCl}_3$ )  $\delta$  171.2, 148.8, 142.9, 132.0, 129.4, 128.0, 126.4, 124.7, 124.5, 118.7, 117.4, 54.2, 28.2, 23.9, 19.4.

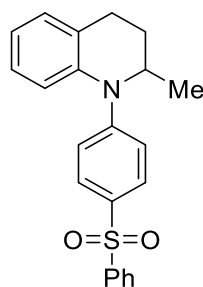

#### **2-methyl-1-(4-(phenylsulfonyl)phenyl)-1,2,3,4-tetrahydroquinoline (4f)**<sup>[1]</sup>

Following the General Procedure using 1,2,3,4-tetrahydro-2-methylquinoline (29.4 mg, 0.2 mmol, 1.0 equiv) and 1-chloro-4-(phenylsulfonyl)benzene (60.5 mg, 0.24 mmol, 1.2 equiv), the reaction mixture was stirred at r.t. for 24 h. The crude product was purified by column chromatography (5-10% EtOAc in hexanes) to provide the title compound as a solid in 84% yield (61 mg).

$^1\text{H}$  NMR (400 MHz,  $\text{CDCl}_3$ )  $\delta$  7.9 (d,  $J = 6.7$  Hz, 2H), 7.8 (d,  $J = 9.0$  Hz, 2H), 7.5 (m, 3H), 7.2 (d,  $J = 8.9$  Hz, 2H), 7.1 (m, 1H), 7.0 (m, 2H), 6.9 (m, 1H), 4.1 (m, 1H), 2.8 (m, 2H), 2.1 (m, 1H), 1.7 (m, 1H), 1.2 (d,  $J = 6.6$  Hz, 3H).  $^{13}\text{C}$  NMR (101 MHz,  $\text{CDCl}_3$ )  $\delta$  152.5, 142.7, 140.0, 132.8, 131.9, 129.5, 129.3, 129.3, 128.5, 127.4, 126.5, 121.9, 120.7, 119.8, 53.8, 29.3, 23.7, 18.7.

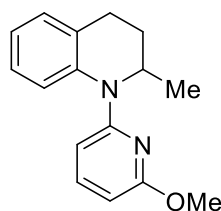

#### **1-(6-methoxypyridin-2-yl)-2-methyl-1,2,3,4-tetrahydroquinoline (4g)**

Following the General Procedure using 1,2,3,4-tetrahydro-2-methylquinoline (29.4 mg, 0.2 mmol, 1.0 equiv) and 2-chloro-6-methoxypyridine (34.3 mg, 0.24 mmol, 1.2 equiv), the reaction mixture was stirred at r.t. for 24 h. The crude product was purified by column chromatography (5-10% EtOAc in hexanes) to provide the title compound as a yellow oil in 90% yield (46 mg).

$^1\text{H}$  NMR (400 MHz,  $\text{CDCl}_3$ )  $\delta$  7.3 (m, 2H), 7.2 (d,  $J = 8.7$  Hz, 1H), 7.1 (t,  $J = 7.7$  Hz, 1H), 6.9 (t,  $J = 7.4$  Hz, 1H), 6.6 (d,  $J = 8.0$  Hz, 1H), 6.2 (d,  $J = 7.9$  Hz, 1H), 4.8 (m, 1H), 3.9 (s, 3H), 2.8 (m, 2H), 2.2 (m, 1H), 1.7 (m, 1H), 1.3 (d,  $J = 6.6$  Hz, 3H).  $^{13}\text{C}$  NMR (101 MHz,  $\text{cdCl}_3$ )  $\delta$  163.4, 156.7, 140.0, 139.4, 130.4, 128.9, 126.0, 122.3, 121.9, 103.1, 99.9, 53.2, 50.2, 30.4, 24.7, 19.2. IR (neat,  $\text{cm}^{-1}$ ): 2971, 1575, 1433, 1411, 1255, 1045, 753. HRMS (ESI) calculated for  $\text{C}_{16}\text{H}_{19}\text{N}_2\text{O}$   $[\text{M}+\text{H}]^+$   $m/z$  255.1492, found 255.1492.

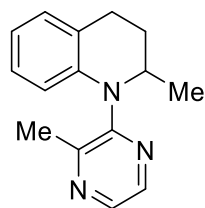

#### **2-methyl-1-(3-methylpyrazin-2-yl)-1,2,3,4-tetrahydroquinoline (4h)**

Following the General Procedure using 1,2,3,4-tetrahydro-2-methylquinoline (29.4 mg, 0.2 mmol, 1.0 equiv) and 2-chloro-3-methylpyrazine (30.7 mg, 0.24 mmol, 1.2 equiv), the reaction mixture was stirred at 80 °C for 24 h. The crude product was purified by column chromatography (5-10% EtOAc in hexanes) to provide the title compound as a yellow oil in 75% yield (36 mg).

$^1\text{H}$  NMR (400 MHz,  $\text{CDCl}_3$ )  $\delta$  8.3 (m, 2H), 7.1 (m, 1H), 6.9 (m, 1H), 6.8 (m, 1H), 6.1 (m, 1H), 4.3 (m, 1H), 2.9 (m, 2H), 2.3 (s, 3H), 2.1 (m, 1H), 1.9 (m, 1H), 1.2 (d,  $J = 6.5$  Hz, 3H).  $^{13}\text{C}$  NMR (101 MHz,  $\text{cdCl}_3$ )  $\delta$  153.7, 151.6, 141.9, 141.2, 139.4, 129.2, 126.6, 125.4, 119.7, 115.6, 52.0, 29.5, 24.4, 21.8, 19.5. IR (neat,  $\text{cm}^{-1}$ ): 1737, 1493, 1406, 1373, 1237, 1044. HRMS (EI) calculated for  $\text{C}_{15}\text{H}_{17}\text{N}_3$   $[\text{M}]^+$   $m/z$  239.1179, found 239.1174.

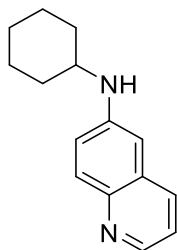

#### **N-cyclohexylquinolin-6-amine (4i)** <sup>[5]</sup>

Following the General Procedure using cyclohexanamine (19.8 mg, 0.2 mmol, 1.0 equiv) and 6-chloroquinoline (39.1 mg, 0.24 mmol, 1.2 equiv), the reaction mixture was stirred at r.t. for 24 h. The crude product was purified by column chromatography (0-5% EtOAc in hexanes) to provide the title compound as a yellow oil in 93% yield (42 mg).

<sup>1</sup>H NMR (400 MHz, CDCl<sub>3</sub>) δ 8.6 (d, *J* = 4.2 Hz, 1H), 7.9 (m, 2H), 7.2 (m, 1H), 7.0 (m, 1H), 6.7 (d, *J* = 2.6 Hz, 1H), 3.9 (s, 1H), 3.4 (t, *J* = 9.9 Hz, 1H), 2.1 (m, 2H), 1.8 (m, 2H), 1.7 (m, 1H), 1.4 (m, 2H), 1.2 (m, 3H). <sup>13</sup>C NMR (101 MHz, CDCl<sub>3</sub>) δ 145.9, 145.3, 143.0, 133.7, 130.3, 130.3, 121.7, 121.4, 103.1, 51.8, 33.2, 25.9, 25.0.

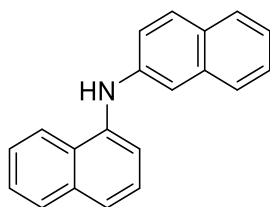

#### **N-(naphthalen-2-yl)naphthalen-1-amine (4j)** <sup>[6]</sup>

Following the General Procedure using naphthalen-1-amine (28.6 mg, 0.2 mmol, 1.0 equiv) and 2-chloronaphthalene (38.9 mg, 0.24 mmol, 1.2 equiv), the reaction mixture was stirred at 80 °C for 24 h. The crude product was purified by column chromatography (0-5% EtOAc in hexanes) to provide the title compound as a yellow oil in 84% yield (45 mg).

<sup>1</sup>H NMR (400 MHz, CDCl<sub>3</sub>) δ 8.0 (d, *J* = 8.4 Hz, 1H), 7.9 (d, *J* = 7.3 Hz, 1H), 7.7 (d, *J* = 8.4 Hz, 2H), 7.6 (m, 2H), 7.4 (m, 4H), 7.4 (m, 1H), 7.2 (m, 3H), 6.0 (s, 1H). <sup>13</sup>C NMR (101 MHz, CDCl<sub>3</sub>) δ 142.7, 138.7, 134.9, 134.8, 129.3, 129.1, 128.7, 128.1, 127.8, 126.5, 126.5, 126.3, 126.2, 125.9, 123.6, 123.4, 122.1, 119.8, 116.7, 111.5.

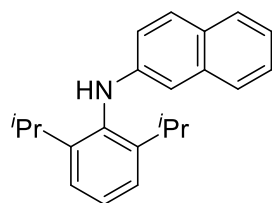

### **N-(2,6-diisopropylphenyl)naphthalen-2-amine (4k)** <sup>[7]</sup>

Following the General Procedure using 2,6-diisopropylaniline (35.4 mg, 0.2 mmol, 1.0 equiv) and 2-chloronaphthalene (38.9 mg, 0.24 mmol, 1.2 equiv), the reaction mixture was stirred at 80 °C for 24 h. The crude product was purified by column chromatography (0-5% EtOAc in hexanes) to provide the title compound as a yellow oil in 84% yield (51 mg).

<sup>1</sup>H NMR (400 MHz, CDCl<sub>3</sub>) δ 7.7 (m, 2H), 7.5 (m, 1H), 7.3 (m, 2H), 7.3 (m, 2H), 7.2 (m, 1H), 6.9 (m, 1H), 6.6 (m, 1H), 5.3 (s, 1H), 3.2 (m, 2H), 1.1 (d, *J* = 6.9 Hz, 12H). <sup>13</sup>C NMR (101 MHz, CDCl<sub>3</sub>) δ 147.7, 145.9, 135.2, 135.1, 129.2, 127.8, 127.8, 127.5, 126.4, 126.1, 124.1, 122.2, 117.2, 105.9, 28.4, 24.0.

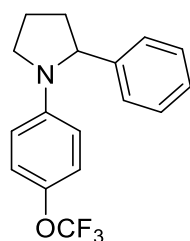

### **2-phenyl-1-(4-(trifluoromethoxy)phenyl)pyrrolidine (4l)**

Following the General Procedure using 2-phenylpyrrolidine (29.4 mg, 0.2 mmol, 1.0 equiv) and 1-chloro-4-(trifluoromethoxy)benzene (47.0 mg, 0.24 mmol, 1.2 equiv), the reaction mixture was stirred at r.t. for 24 h. The crude product was purified by column chromatography (0-5% EtOAc in hexanes) to provide the title compound as a yellow oil in 80% yield (49 mg).

<sup>1</sup>H NMR (400 MHz, CDCl<sub>3</sub>) δ 7.3 (m, 2H), 7.2 (m, 3H), 7.0 (m, 2H), 6.4 (d, *J* = 9.1 Hz, 2H), 4.7 (m, 1H), 3.7 (m, 1H), 3.4 (m, 1H), 2.4 (m, 1H), 2.0 (m, 3H). <sup>13</sup>C NMR (101 MHz, CDCl<sub>3</sub>) δ 146.1, 144.2, 139.6 (q, *J* = 2.0 Hz), 128.7, 127.0, 126.0, 122.3, 120.9 (q, *J* = 255.5 Hz), 112.6, 63.3, 49.5, 36.3, 23.3. <sup>19</sup>F NMR (376 MHz, CDCl<sub>3</sub>) δ -58.5. IR (neat, cm<sup>-1</sup>): 2928, 1515, 1369, 1257, 1225, 1258, 700. HRMS (ESI) calculated for C<sub>17</sub>H<sub>17</sub>F<sub>3</sub>NO [M+H]<sup>+</sup> *m/z* 308.1257, found 308.1265.

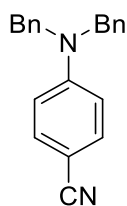

#### 4-(dibenzylamino)benzonitrile (4m) <sup>[8]</sup>

Following the General Procedure using dibenzylamine (39.4 mg, 0.2 mmol, 1.0 equiv) and 4-chlorobenzonitrile (32.9 mg, 0.24 mmol, 1.2 equiv), the reaction mixture was stirred at r.t. for 24 h. The crude product was purified by column chromatography (0-5% EtOAc in hexanes) to provide the title compound as a yellow oil in 80% yield (48 mg).

<sup>1</sup>H NMR (400 MHz, CDCl<sub>3</sub>) δ 7.4 (d, *J* = 9.0 Hz, 2H), 7.3 (m, 4H), 7.3 (m, 2H), 7.2 (m, 4H), 6.7 (d, *J* = 9.0 Hz, 2H), 4.7 (s, 4H). <sup>13</sup>C NMR (101 MHz, CDCl<sub>3</sub>) δ 151.9, 136.9, 133.8, 129.1, 127.6, 126.4, 120.5, 112.2, 98.6, 54.2.

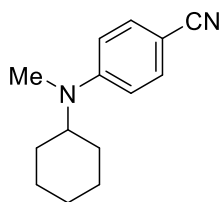

#### 4-(cyclohexyl(methyl)amino)benzonitrile (4n)

Following the General Procedure using N-methylcyclohexanamine (22.6 mg, 0.2 mmol, 1.0 equiv) and 4-chlorobenzonitrile (32.9 mg, 0.24 mmol, 1.2 equiv), the reaction mixture was stirred at 80 °C for 24 h. The crude product was purified by column chromatography (0-5% EtOAc in hexanes) to provide the title compound as a yellow oil in 88% yield (38 mg).

<sup>1</sup>H NMR (400 MHz, CDCl<sub>3</sub>) δ 7.4 (d, *J* = 9.1 Hz, 2H), 6.7 (d, *J* = 9.1 Hz, 2H), 3.6 (m, 1H), 2.8 (s, 3H), 1.9 (m, 2H), 1.7 (m, 3H), 1.4 (m, 4H), 1.1 (m, 1H). <sup>13</sup>C NMR (101 MHz, cdcl<sub>3</sub>) δ 152.3, 133.6, 121.0, 111.8, 96.9, 57.5, 31.1, 30.2, 26.1, 25.7. IR (neat, cm<sup>-1</sup>): 2929, 2211, 1763, 1518, 1395, 1234, 816. HRMS (ESI) calculated for C<sub>14</sub>H<sub>19</sub>N<sub>2</sub> [M+H]<sup>+</sup> *m/z* 215.1543, found 215.1543.

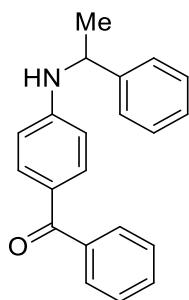

### phenyl(4-((1-phenylethyl)amino)phenyl)methanone (4o)

Following the General Procedure using 1-phenylethan-1-amine (24.2 mg, 0.2 mmol, 1.0 equiv) and (4-chlorophenyl)(phenyl)methanone (51.8 mg, 0.24 mmol, 1.2 equiv), the reaction mixture was stirred at r.t. for 24 h. The crude product was purified by column chromatography (5-10% EtOAc in hexanes) to provide the title compound as a yellow oil in 91% yield (55 mg).

$^1\text{H}$  NMR (400 MHz,  $\text{CDCl}_3$ )  $\delta$  7.7 (m, 4H), 7.5 (t,  $J = 7.4$  Hz, 1H), 7.4 (t,  $J = 7.5$  Hz, 2H), 7.3 (m, 4H), 7.2 (m, 1H), 6.5 (d,  $J = 8.4$  Hz, 2H), 4.8 (m, 1H), 4.6 (m, 1H), 1.5 (d,  $J = 6.7$  Hz, 3H).

$^{13}\text{C}$  NMR (101 MHz,  $\text{CDCl}_3$ )  $\delta$  195.3, 151.2, 144.2, 139.2, 132.9, 131.3, 129.5, 128.9, 128.1, 127.3, 126.1, 125.8, 112.1, 53.2, 24.8. IR (neat,  $\text{cm}^{-1}$ ): 3348, 1735, 1592, 1525, 1315, 1147, 699.

HRMS (ESI) calculated for  $\text{C}_{21}\text{H}_{20}\text{NO}$   $[\text{M}+\text{H}]^+$   $m/z$  302.1539, found 302.1547.

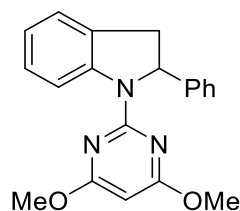

### 1-(4,6-dimethoxypyrimidin-2-yl)-2-phenylindoline (4p)

Following the General Procedure using 2-phenylindoline (39.0 mg, 0.2 mmol, 1.0 equiv) and 2-chloro-4,6-dimethoxypyrimidine (41.8 mg, 0.24 mmol, 1.2 equiv), the reaction mixture was stirred at r.t. for 24 h. The crude product was purified by column chromatography (5-10% EtOAc in hexanes) to provide the title compound as a yellow oil in 87% yield (58 mg).

$^1\text{H}$  NMR (400 MHz,  $\text{CDCl}_3$ )  $\delta$  8.4 (d,  $J = 8.1$  Hz, 1H), 7.3 (t,  $J = 7.5$  Hz, 1H), 7.2 (d,  $J = 4.3$  Hz, 4H), 7.2 (m, 2H), 7.0 (m, 1H), 5.8 (m, 1H), 5.5 (s, 1H), 3.7 (m, 7H), 3.0 (m, 1H).  $^{13}\text{C}$  NMR (101 MHz,  $\text{CDCl}_3$ )  $\delta$  171.4, 157.8, 145.2, 144.2, 130.6, 128.5, 127.5, 126.9, 125.4, 125.0, 122.0,

115.5, 80.9, 63.4, 53.9, 37.8. IR (neat,  $\text{cm}^{-1}$ ): 2974, 1573, 1505, 1358, 1193, 1044, 800. HRMS

(ESI) calculated for C<sub>20</sub>H<sub>20</sub>N<sub>3</sub>O<sub>2</sub> [M+H]<sup>+</sup> *m/z* 334.1550, found 334.1557.

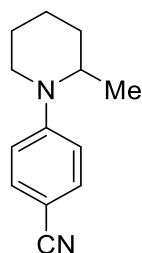

#### 4-(2-methylpiperidin-1-yl)benzonitrile (4q)<sup>[9]</sup>

Following the General Procedure using 2-methylpiperidine (19.8 mg, 0.2 mmol, 1.0 equiv) and 4-chlorobenzonitrile (32.9 mg, 0.24 mmol, 1.2 equiv), the reaction mixture was stirred at 80 °C for 24 h. The crude product was purified by column chromatography (0-5% EtOAc in hexanes) to provide the title compound as a yellow oil in 58% yield (23 mg).

<sup>1</sup>H NMR (400 MHz, CDCl<sub>3</sub>) δ 7.4 (d, *J* = 8.9 Hz, 2H), 6.8 (d, *J* = 8.9 Hz, 2H), 4.2 (m, 1H), 3.6 (m, 1H), 3.0 (m, 1H), 1.8 (m, 2H), 1.6 (m, 3H), 1.6 (m, 1H), 1.1 (d, *J* = 6.8 Hz, 3H). <sup>13</sup>C NMR (101 MHz, CDCl<sub>3</sub>) δ 153.2, 133.6, 120.6, 113.8, 98.4, 49.3, 41.6, 30.7, 25.6, 18.5, 13.7.

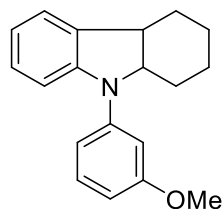

#### 9-(3-methoxyphenyl)-2,3,4,4a,9,9a-hexahydro-1H-carbazole (4r)

Following the General Procedure using 2,3,4,4a,9,9a-hexahydro-1H-carbazole (34.6 mg, 0.2 mmol, 1.0 equiv) and 1-chloro-3-methoxybenzene (34 mg, 0.24 mmol, 1.2 equiv), the reaction mixture was stirred at 80 °C for 24 h. The crude product was purified by column chromatography (0-5% EtOAc in hexanes) to provide the title compound as a yellow oil in 45% yield (25 mg).

<sup>1</sup>H NMR (400 MHz, CDCl<sub>3</sub>) δ 7.2 (m, 1H), 7.1 (d, *J* = 7.3 Hz, 1H), 7.0 (t, *J* = 7.7 Hz, 1H), 6.9 (d, *J* = 7.9 Hz, 1H), 6.8 (m, 3H), 6.6 (m, 1H), 4.1 (m, 1H), 3.8 (s, 3H), 3.3 (m, 1H), 1.8 (m, 3H), 1.7 (m, 1H), 1.5 (m, 3H), 1.3 (m, 1H). <sup>13</sup>C NMR (101 MHz, CDCl<sub>3</sub>) δ 160.7, 148.0, 144.9, 135.0, 130.0, 127.1, 123.3, 119.2, 113.7, 109.8, 107.8, 107.1, 64.6, 55.4, 40.7, 27.4, 26.3, 22.5, 21.7. IR (neat, cm<sup>-1</sup>): 2928, 1737, 1594, 1476, 1372, 1235, 1044. HRMS (ESI) calculated for

C<sub>19</sub>H<sub>22</sub>NO [M+H]<sup>+</sup> *m/z* 280.1696, found 280.1703.

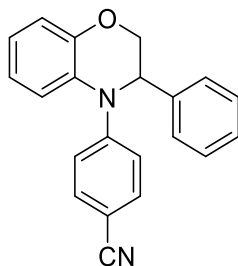

#### 4-(3-methyl-2,3-dihydro-4H-benzo[b][1,4]oxazin-4-yl)benzonitrile (4s)

Following the General Procedure using 3-phenyl-3,4-dihydro-2H-benzo[b][1,4]oxazine (42.2 mg, 0.2 mmol, 1.0 equiv) and 4-chlorobenzonitrile (32.9 mg, 0.24 mmol, 1.2 equiv), the reaction mixture was stirred at 80 °C for 24 h. The crude product was purified by column chromatography (0-5% EtOAc in hexanes) to provide the title compound as a yellow oil in 62% yield (39 mg).

<sup>1</sup>H NMR (400 MHz, CDCl<sub>3</sub>) δ 7.5 (d, *J* = 8.8 Hz, 2H), 7.3 (m, 8H), 6.9 (m, 3H), 4.9 (t, *J* = 2.8 Hz, 1H), 4.6 (dd, *J* = 10.9, 2.6 Hz, 1H), 4.4 (dd, *J* = 10.9, 2.9 Hz, 1H). <sup>13</sup>C NMR (101 MHz, CDCl<sub>3</sub>) δ 150.5, 145.8, 138.4, 133.7, 129.1, 128.8, 128.0, 126.6, 122.5, 121.6, 121.1, 119.3, 118.4, 117.9, 105.0, 68.4, 60.8. IR (neat, cm<sup>-1</sup>): 2923, 2220, 1595, 1506, 1379, 1253, 750. HRMS (EI) calculated for C<sub>21</sub>H<sub>16</sub>N<sub>2</sub>O [M]<sup>+</sup> *m/z* 312.1263, found 312.1268.

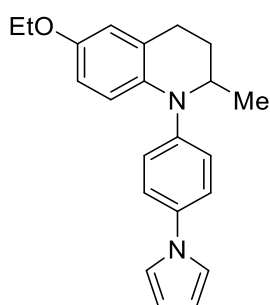

#### 1-(4-(1H-pyrrol-1-yl)phenyl)-6-ethoxy-2-methyl-1,2,3,4-tetrahydroquinoline (4t)

Following the General Procedure using 6-ethoxy-2-methyl-1,2,3,4-tetrahydroquinoline (38.2 mg, 0.2 mmol, 1.0 equiv) and 1-(4-chlorophenyl)-1H-pyrrole (42.5 mg, 0.24 mmol, 1.2 equiv), the reaction mixture was stirred at 80 °C for 24 h. The crude product was purified by column chromatography (5-10% EtOAc in hexanes) to provide the title compound as a yellow oil in 43% yield (29 mg).



$^1\text{H}$  NMR (400 MHz,  $\text{CDCl}_3$ )  $\delta$  7.3 (d,  $J = 8.8$  Hz, 2H), 7.2 (d,  $J = 8.8$  Hz, 2H), 7.0 (t,  $J = 2.2$  Hz, 2H), 6.7 (m, 2H), 6.6 (m, 1H), 6.3 (t,  $J = 2.2$  Hz, 2H), 4.0 (m, 2H), 3.9 (m, 1H), 2.8 (m, 2H), 2.1 (m, 1H), 1.8 (m, 1H), 1.4 (t,  $J = 7.0$  Hz, 3H), 1.2 (d,  $J = 6.6$  Hz, 3H).  $^{13}\text{C}$  NMR (101 MHz,  $\text{CDCl}_3$ )  $\delta$  152.1, 146.8, 137.2, 136.1, 126.2, 125.6, 121.8, 119.6, 119.3, 115.1, 113.4, 110.1, 64.0, 54.6, 28.4, 24.5, 19.5, 15.2. IR (neat,  $\text{cm}^{-1}$ ): 2927, 1737, 1516, 1497, 1235, 1043, 726. HRMS (ESI) calculated for  $\text{C}_{22}\text{H}_{25}\text{N}_2\text{O}$   $[\text{M}+\text{H}]^+$   $m/z$  333.1961, found 333.1963.

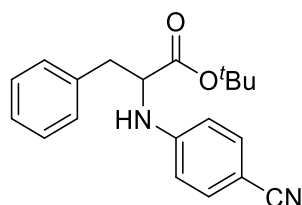

#### ***tert*-butyl (4-cyanophenyl)phenylalaninate (5a)**

Following the General Procedure using *tert*-butyl phenylalaninate (44.2 mg, 0.2 mmol, 1.0 equiv) and 4-chlorobenzonitrile (32.9 mg, 0.24 mmol, 1.2 equiv), the reaction mixture was stirred at 80 °C for 24 h. The crude product was purified by column chromatography (0-5% EtOAc in hexanes) to provide the title compound as a yellow oil in 62% yield (40 mg).

$^1\text{H}$  NMR (400 MHz,  $\text{CDCl}_3$ )  $\delta$  7.4 (d,  $J = 8.8$  Hz, 2H), 7.3 (m, 3H), 7.2 (m, 2H), 6.5 (d,  $J = 8.8$  Hz, 2H), 4.7 (m, 1H), 4.3 (m, 1H), 3.1 (m, 2H), 1.4 (s, 9H).  $^{13}\text{C}$  NMR (101 MHz,  $\text{CDCl}_3$ )  $\delta$  171.2, 149.9, 135.9, 133.9, 129.6, 128.6, 127.3, 120.3, 113.0, 99.9, 82.8, 57.2, 38.3, 28.0. IR (neat,  $\text{cm}^{-1}$ ): 3365, 2927, 2215, 1730, 1607, 1524, 1152. HRMS (ESI) calculated for  $\text{C}_{20}\text{H}_{22}\text{N}_2\text{NaO}_2$   $[\text{M}+\text{Na}]^+$   $m/z$  345.1573, found 345.1576.

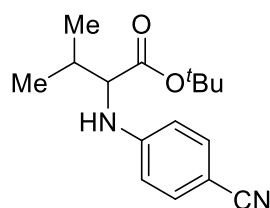

#### ***tert*-butyl (4-cyanophenyl)valinate (5b)**

Following the General Procedure using *tert*-butyl valinate (34.6 mg, 0.2 mmol, 1.0 equiv) and 4-chlorobenzonitrile (32.9 mg, 0.24 mmol, 1.2 equiv), the reaction mixture was stirred at 80 °C for 24 h. The crude product was purified by column chromatography (0-5% EtOAc in hexanes)

to provide the title compound as a yellow oil in 80% yield (44 mg).

$^1\text{H}$  NMR (400 MHz,  $\text{CDCl}_3$ )  $\delta$  7.4 (d,  $J = 8.7$  Hz, 2H), 6.6 (d,  $J = 8.6$  Hz, 2H), 4.7 (d,  $J = 8.6$  Hz, 1H), 3.8 (m, 1H), 2.1 (m, 1H), 1.5 (s, 9H), 1.0 (m, 6H).  $^{13}\text{C}$  NMR (101 MHz,  $\text{CDCl}_3$ )  $\delta$  171.6, 150.8, 133.8, 120.3, 113.0, 99.5, 82.4, 61.8, 31.4, 28.1, 18.9, 18.6. IR (neat,  $\text{cm}^{-1}$ ): 3368, 2969, 2214, 1724, 1606, 1524, 1147. HRMS (ESI) calculated for  $\text{C}_{16}\text{H}_{22}\text{N}_2\text{NaO}_2$   $[\text{M}+\text{Na}]^+ m/z$  297.1573, found 297.1576.

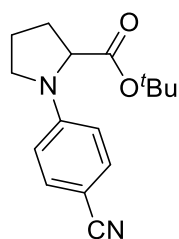

#### ***tert*-butyl (4-cyanophenyl)prolinate (5c)**

Following the General Procedure using *tert*-butyl prolinate (34.2 mg, 0.2 mmol, 1.0 equiv) and 4-chlorobenzonitrile (32.9 mg, 0.24 mmol, 1.2 equiv), the reaction mixture was stirred at 80 °C for 24 h. The crude product was purified by column chromatography (0-5% EtOAc in hexanes) to provide the title compound as a yellow oil in 78% yield (42 mg).

$^1\text{H}$  NMR (400 MHz,  $\text{CDCl}_3$ )  $\delta$  7.4 (m, 2H), 6.5 (m, 2H), 4.2 (m, 1H), 3.5 (m, 1H), 3.4 (m, 1H), 2.3 (m, 1H), 2.2 (m, 2H), 2.1 (m, 1H), 1.4 (s, 9H).  $^{13}\text{C}$  NMR (101 MHz,  $\text{CDCl}_3$ )  $\delta$  172.4, 149.5, 133.6, 120.7, 112.1, 98.2, 82.0, 61.5, 48.3, 30.8, 28.1, 23.7. IR (neat,  $\text{cm}^{-1}$ ): 2977, 2213, 1735, 1606, 1521, 1385, 1150. HRMS (ESI) calculated for  $\text{C}_{16}\text{H}_{20}\text{N}_2\text{NaO}_2$   $[\text{M}+\text{Na}]^+ m/z$  295.1417, found 295.1425.

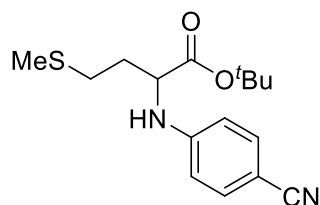

#### ***tert*-butyl (4-cyanophenyl)methioninate (5d)**

Following the General Procedure using *tert*-butyl methioninate (41.0 mg, 0.2 mmol, 1.0 equiv) and 4-chlorobenzonitrile (32.9 mg, 0.24 mmol, 1.2 equiv), the reaction mixture was stirred at 80 °C for 24 h. The crude product was purified by column chromatography (0-5% EtOAc in

hexanes) to provide the title compound as a yellow oil in 87% yield (53 mg).

$^1\text{H}$  NMR (400 MHz,  $\text{CDCl}_3$ )  $\delta$  7.4 (d,  $J = 8.8$  Hz, 2H), 6.6 (d,  $J = 8.8$  Hz, 2H), 4.8 (d,  $J = 8.3$  Hz, 1H), 4.2 (m, 1H), 2.6 (t,  $J = 7.3$  Hz, 2H), 2.1 (m, 1H), 2.1 (s, 3H), 2.0 (m, 1H), 1.4 (s, 9H).  $^{13}\text{C}$  NMR (101 MHz,  $\text{CDCl}_3$ )  $\delta$  171.7, 150.2, 133.8, 120.2, 113.0, 99.9, 82.8, 55.2, 31.9, 30.1, 28.1, 15.6. IR (neat,  $\text{cm}^{-1}$ ): 3359, 2978, 2214, 1730, 1606, 1524, 1369, 1150. HRMS (ESI) calculated for  $\text{C}_{16}\text{H}_{23}\text{N}_2\text{O}_2\text{S}$   $[\text{M}+\text{H}]^+$   $m/z$  307.1475, found 307.1479.

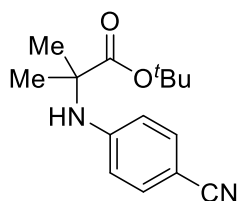

#### ***tert*-butyl 2-((4-cyanophenyl)amino)-2-methylpropanoate (5e)**

Following the General Procedure using *tert*-butyl 2-amino-2-methylpropanoate (31.8 mg, 0.2 mmol, 1.0 equiv) and 4-chlorobenzonitrile (32.9 mg, 0.24 mmol, 1.2 equiv), the reaction mixture was stirred at 80 °C for 24 h. The crude product was purified by column chromatography (0-5% EtOAc in hexanes) to provide the title compound as a yellow oil in 70% yield (37 mg).

$^1\text{H}$  NMR (400 MHz,  $\text{CDCl}_3$ )  $\delta$  7.4 (d,  $J = 8.8$  Hz, 2H), 6.5 (m, 2H), 4.6 (s, 1H), 1.5 (s, 6H), 1.4 (s, 9H).  $^{13}\text{C}$  NMR (101 MHz,  $\text{CDCl}_3$ )  $\delta$  174.2, 149.4, 133.5, 120.4, 114.0, 99.4, 82.0, 57.8, 27.9, 26.0.

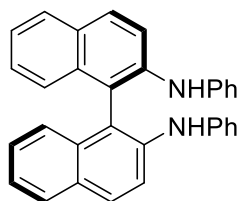

#### **$\text{N}^2,\text{N}^{2'}$ -diphenyl-[1,1'-binaphthalene]-2,2'-diamine (6a)**

Following the General Procedure using [1,1'-binaphthalene]-2,2'-diamine (56.8 mg, 0.2 mmol, 1.0 equiv) and chlorobenzene (53.8 mg, 0.48 mmol, 2.4 equiv), the reaction mixture was stirred at r.t. for 24 h. The crude product was purified by column chromatography (0-5% EtOAc in hexanes) to provide the title compound as a yellow oil in 95% yield (83 mg).

$^1\text{H}$  NMR (400 MHz,  $\text{CDCl}_3$ )  $\delta$  7.8 (m, 4H), 7.7 (d,  $J = 9.0$  Hz, 2H), 7.3 (m, 2H), 7.2 (m, 8H),

6.9 (m, 6H), 5.6 (s, 2H). <sup>13</sup>C NMR (101 MHz, CDCl<sub>3</sub>) δ 142.6, 140.5, 134.1, 129.5, 129.5, 129.3, 128.3, 127.2, 124.6, 123.6, 122.3, 120.0, 118.0, 116.5.

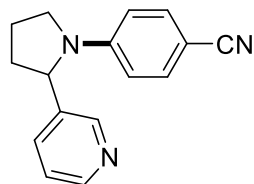

#### 4-(2-(pyridin-3-yl)pyrrolidin-1-yl)benzonitrile (6b)

Following the General Procedure using 3-(pyrrolidin-2-yl)pyridine (29.6 mg, 0.2 mmol, 1.0 equiv) and 4-chlorobenzonitrile (32.9 mg, 0.24 mmol, 1.2 equiv), the reaction mixture was stirred at r.t. for 24 h. The crude product was purified by column chromatography (5-10% EtOAc in hexanes) to provide the title compound as a yellow oil in 78% yield (39 mg).

<sup>1</sup>H NMR (400 MHz, CDCl<sub>3</sub>) δ 8.5 (m 2H), 7.4 (d, *J* = 7.9 Hz, 1H), 7.4 (d, *J* = 8.9 Hz, 2H), 7.3 (m, 1H), 6.4 (d, *J* = 9.0 Hz, 2H), 4.9 (d, *J* = 8.6 Hz, 1H), 3.7 (m, 1H), 3.5 (m 1H), 2.5 (m, 1H), 2.0 (m, 3H). <sup>13</sup>C NMR (101 MHz, CDCl<sub>3</sub>) δ 149.3, 148.8, 147.9, 138.2, 133.5(2C), 123.7, 120.6, 112.6, 98.1, 60.7, 49.1, 35.8, 22.8.

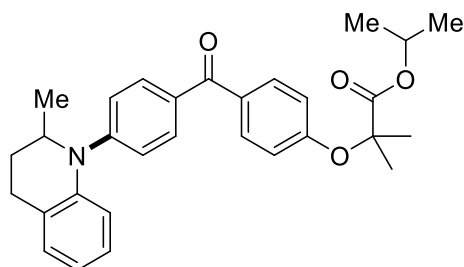

#### Isopropyl 2-methyl-2-(4-(4-(2-methyl-3,4-dihydroquinolin-1(2H)yl)benzoyl)phenoxy)propanoate (6c)

Following the General Procedure using 2-methyl-1,2,3,4-tetrahydroquinoline (29.4 mg, 0.2 mmol, 1.0 equiv) and isopropyl 2-(4-(4-chlorobenzoyl)phenoxy)-2-methylpropanoate (86.4 mg, 0.24 mmol, 1.2 equiv), the reaction mixture was stirred at 80 °C for 24 h. The crude product was purified by column chromatography (5-10% EtOAc in hexanes) to provide the title compound as a yellow oil in 66% yield (62 mg).

<sup>1</sup>H NMR (400 MHz, CDCl<sub>3</sub>) δ 7.7 (m, 4H), 7.2 (d, *J* = 8.7 Hz, 2H), 7.1 (d, *J* = 7.5 Hz, 1H), 7.0 (m, 2H), 6.9 (m, 3H), 5.1 (p, *J* = 6.1 Hz, 1H), 4.2 (m, 1H), 2.8 (m, 2H), 2.1 (m, 1H), 1.8 (m,

1H), 1.7 (s, 6H), 1.3 (d,  $J = 6.6$  Hz, 3H), 1.2 (d,  $J = 6.2$  Hz, 6H).  $^{13}\text{C}$  NMR (101 MHz,  $\text{CDCl}_3$ )  $\delta$  194.3, 173.4, 159.2, 151.9, 141.1, 131.9, 131.8, 131.6, 130.9, 129.5, 127.2, 126.5, 120.8, 120.7, 119.9, 117.3, 79.4, 69.4, 53.9, 28.9, 25.5, 25.5, 23.8, 21.7, 19.0.

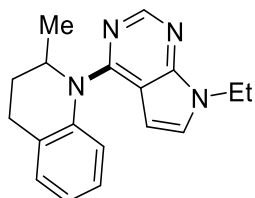

**1-(7-ethyl-7H-pyrrolo[2,3-d]pyrimidin-4-yl)-2-methyl-1,2,3,4-tetrahydroquinoline (6d)**

Following the General Procedure using 2-methyl-1,2,3,4-tetrahydroquinoline (29.4 mg, 0.2 mmol, 1.0 equiv) and 4-chloro-7-ethyl-7H-pyrrolo[2,3-d]pyrimidine (43.4 mg, 0.24 mmol, 1.2 equiv), the reaction mixture was stirred at r.t. for 24 h. The crude product was purified by column chromatography (5-10% EtOAc in hexanes) to provide the title compound as a yellow oil in 67% yield (39 mg).

$^1\text{H}$  NMR (400 MHz,  $\text{CDCl}_3$ )  $\delta$  8.5 (s, 1H), 7.1 (m, 4H), 6.8 (d,  $J = 3.6$  Hz, 1H), 5.5 (d,  $J = 3.6$  Hz, 1H), 5.0 (m, 1H), 4.2 (q,  $J = 7.3$  Hz, 2H), 2.7 (m, 2H), 2.3 (m, 1H), 1.6 (m, 1H), 1.4 (t,  $J = 7.3$  Hz, 3H), 1.3 (d,  $J = 6.6$  Hz, 3H).  $^{13}\text{C}$  NMR (101 MHz,  $\text{CDCl}_3$ )  $\delta$  156.2, 151.5, 151.0, 138.7, 132.8, 128.2, 125.8, 124.7, 124.1, 122.9, 105.5, 101.5, 50.9, 39.5, 31.4, 24.9, 19.4, 15.8.

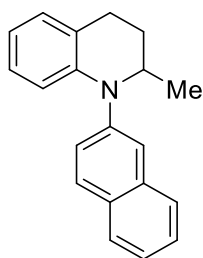

**2-methyl-1-(naphthalen-2-yl)-1,2,3,4-tetrahydroquinoline (6e)**

Following the General Procedure using 2-methyl-1,2,3,4-tetrahydroquinoline (29.4 mg, 0.2 mmol, 1.0 equiv) and phenol derivative (0.24 mmol, 1.2 equiv), the reaction mixture was stirred at indicated temperature for 24 h. The crude product was purified by column chromatography (0-5% EtOAc in hexanes) to provide the title compound as a yellow oil.

$^1\text{H}$  NMR (400 MHz,  $\text{CDCl}_3$ )  $\delta$  7.80 (d,  $J = 9.0$  Hz, 2H), 7.73 (d,  $J = 7.8$  Hz, 1H), 7.62 (d,  $J =$

1.9 Hz, 1H), 7.41 (m, 3H), 7.07 (d,  $J = 7.3$  Hz, 1H), 6.90 (m, 1H), 6.69 (td,  $J = 7.3, 0.9$  Hz, 1H), 6.61 (d,  $J = 8.2$  Hz, 1H), 4.05 (m, 1H), 2.94 (m, 1H), 2.84 (m, 1H), 2.11 (m, 1H), 1.88 (m, 1H), 1.21 (d,  $J = 6.5$  Hz, 3H).  $^{13}\text{C}$  NMR (101 MHz,  $\text{CDCl}_3$ )  $\delta$  145.1, 144.0, 134.7, 131.0, 129.4, 129.2, 127.7, 127.4, 126.6, 126.4, 126.3, 125.1, 123.7, 123.3, 118.0, 116.4, 54.4, 28.5, 24.3, 19.8.

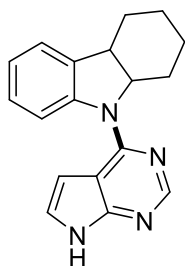

### 9-(7H-pyrrolo[2,3-d]pyrimidin-4-yl)-2,3,4,4a,9,9a-hexahydro-1H-carbazole (7)

Following the General Procedure using 2,3,4,4a,9,9a-hexahydro-1H-carbazole (34.6 mg, 0.2 mmol, 1.0 equiv) and 4-chloro-7H-pyrrolo[2,3-d]pyrimidine (36.7 mg, 0.24 mmol, 1.2 equiv), the reaction mixture was stirred at r.t. for 20 h. The crude product was purified by column chromatography (5-10% EtOAc in hexanes) to provide the title compound in 72% yield (42 mg).

$^1\text{H}$  NMR (400 MHz,  $\text{CDCl}_3$ )  $\delta$  11.9 (s, 1H), 8.5 (s, 1H), 8.3 (d,  $J = 7.9$  Hz, 1H), 7.2 (m, 3H), 7.1 (t,  $J = 7.4$  Hz, 1H), 6.6 (d,  $J = 3.6$  Hz, 1H), 4.9 (m, 1H), 3.6 (m, 1H), 2.3 (m, 2H), 1.9 (m, 1H), 1.6 (m, 2H), 1.3 (m, 3H).  $^{13}\text{C}$  NMR (101 MHz,  $\text{CDCl}_3$ )  $\delta$  153.5, 152.3, 150.7, 143.6, 134.6, 127.0, 122.7, 122.5, 121.4, 118.0, 103.1, 101.4, 62.6, 40.4, 27.5, 24.2, 22.6, 21.0.

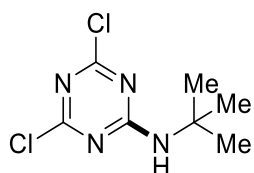

### N-(*tert*-butyl)-4,6-dichloro-1,3,5-triazin-2-amine (8)

Following the General Procedure using 2-methylpropan-2-amine (14.6 mg, 0.2 mmol, 1.0 equiv) and 2,4,6-trichloro-1,3,5-triazine (44.2 mg, 0.24 mmol, 1.2 equiv), the reaction mixture was stirred at 80 °C for 24 h. The crude product was purified by column chromatography (0-5% EtOAc in hexanes) to provide the title compound in 90% yield (40 mg).

$^1\text{H}$  NMR (400 MHz,  $\text{CDCl}_3$ )  $\delta$  5.8 (s, 1H), 1.5 (s, 9H).  $^{13}\text{C}$  NMR (101 MHz,  $\text{cdcl}_3$ )  $\delta$  53.1, 28.5.

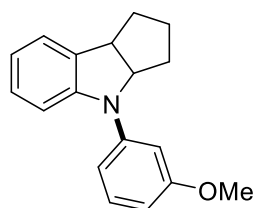

#### 4-(3-methoxyphenyl)-1,2,3,3a,4,8b-hexahydrocyclopenta[b]indole (9)

Following the General Procedure using 1,2,3,3a,4,8b-hexahydrocyclopenta[b]indole (31.8 mg, 0.2 mmol, 1.0 equiv) and 1-chloro-3-methoxybenzene (34.1 mg, 0.24 mmol, 1.2 equiv), the reaction mixture was stirred at 80 °C for 24 h. The crude product was purified by column chromatography (0-5% EtOAc in hexanes) to provide the title compound in 77% yield (41 mg).  $^1\text{H}$  NMR (400 MHz,  $\text{CDCl}_3$ )  $\delta$  7.2 (t,  $J$  = 8.1 Hz, 1H), 7.1 (m, 1H), 7.0 (m, 2H), 6.9 (m, 2H), 6.7 (m, 1H), 6.5 (m, 1H), 4.7 (m, 1H), 3.8 (m, 1H), 3.8 (s, 3H), 1.9 (m, 4H), 1.6 (m, 1H), 1.5 (m, 1H).  $^{13}\text{C}$  NMR (101 MHz,  $\text{CDCl}_3$ )  $\delta$  160.5, 147.2, 144.8, 135.2, 129.9, 127.2, 124.8, 119.0, 111.6, 108.7, 106.3, 105.1, 55.3, 45.6, 34.9, 34.2, 24.6.

#### 5-mmol-scale C–N cross-coupling

##### Gram-scale reaction

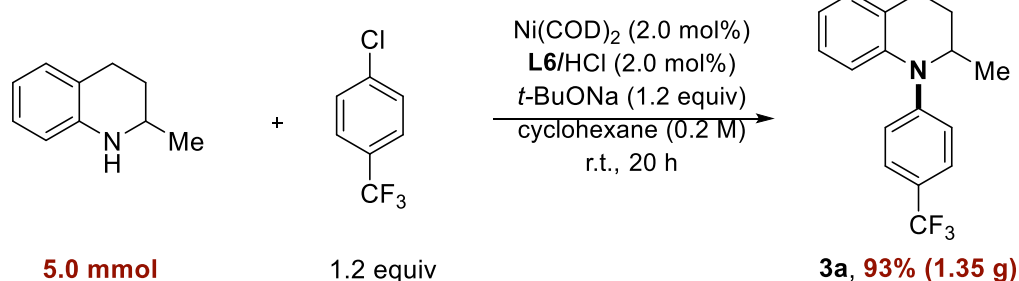

In a nitrogen-filled glove box, an oven-dried screw-cap reaction tube equipped with a magnetic stir bar was charged with  $\text{Ni}(\text{COD})_2$  (27.5 mg, 100  $\mu\text{mol}$ , 2.0 mol%), **L6**/ $\text{HCl}$  (81.0 mg, 100  $\mu\text{mol}$ , 2.0 mol%),  $t\text{-BuOK}$  (672 mg, 6 mmol, 1.2 equiv) and cyclopentane (25.0 mL, 0.2 M). The reaction tube was sealed with a screw-cap septum and stirred at room temperature (r.t.) for 20 min until the color of the reaction mixture changed from yellow to brown. 4-chlorobenzotrifluoride (1083 mg, 6 mmol, 1.2 equiv) and 1,2,3,4-tetrahydro-2-methylquinoline (735 mg, 5 mmol, 1.0 equiv) were added. The reaction tube was wrapped with electrical tape and removed from the glove box. The reaction mixture was stirred at r.t. for 24 h, followed by adding a saturated aqueous solution of  $\text{NaCl}$  (20 mL) and EtOAc (20 mL). The phases were

---

separated, and the aqueous layer was extracted with EtOAc (2 x 20 mL). The combined organic phases were washed with a saturated aqueous solution of NaCl (2 x 20 mL) and then concentrated in vacuo. The crude residue was purified via column chromatography to afford the aminated product **3a** in 93% yield.

## DFT Calculations of the Ni-Catalyzed *N*-Arylation

### Computational Details

All density functional theory (DFT) calculations were carried out using Gaussian16 software package.<sup>10</sup> Geometry optimizations of all intermediates and transition states were carried out at the M06<sup>11</sup> level of theory using a mixed basis set of def2-SVP<sup>3</sup>. Frequency analysis was also performed at the same level of theory as geometry optimization to confirm whether optimized stationary points were either local minimum or transition state, as well as to evaluate zero-point vibrational energies (ZPVE) and thermal corrections at 298 K. The single-point energies were computed based on the gas-phase optimized structures at the M06<sup>11</sup> level of theory with a mixed basis set of def2-TZVP<sup>12</sup>, with the inclusion of solvation energy corrections using a self-consistent reaction field (SCRF) based on SMD implicit solvation model based on density<sup>13</sup> with cyclohexane as solvent.

### Table of energies

Zero-point correction (*ZPE*), thermal correction to enthalpy (*TCH*), thermal correction to Gibbs free energy (*TCG*), energies (*E*), enthalpies (*H*), and Gibbs free energies (*G*) (in Hartree) of the



structures calculated at the M06/def2-TZVP-SMD(cyclohexane)//M06/def2-SVP level of theory.

### Energies for All Calculated Species\*

| Structures                | ZPE      | TCH      | TCG       | E            | H            | G            | Imaginary Frequency |
|---------------------------|----------|----------|-----------|--------------|--------------|--------------|---------------------|
| INT1-L6                   | 1.106011 | 1.169543 | 1.006254  | -4300.127914 | -4298.958371 | -4299.121660 |                     |
| Chlorobenzene             | 0.090526 | 0.096972 | 0.061410  | -691.743683  | -691.646711  | -691.682273  |                     |
| Tetrahydroquinoline anion | 0.192915 | 0.202987 | 0.159023  | -442.920218  | -442.717231  | -442.761195  |                     |
| INT2-L6                   | 1.002882 | 1.062948 | 0.907343  | -4548.914210 | -4547.851262 | -4548.006867 |                     |
| TS3-L6                    | 1.001649 | 1.061672 | 0.904443  | -4548.903588 | -4547.841916 | -4547.999145 | 153.9i              |
| INT4-L6                   | 1.002516 | 1.063244 | 0.904356  | -4548.932398 | -4547.869154 | -4548.028042 |                     |
| INT5-L6                   | 1.200934 | 1.270500 | 1.097835  | -4991.930467 | -4990.659967 | -4990.832632 |                     |
| Chloride anion            | 0.000000 | 0.002360 | -0.015023 | -460.306569  | -460.304209  | -460.321592  |                     |
| INT6-L6                   | 1.201147 | 1.269136 | 1.099352  | -4531.589401 | -4530.320265 | -4530.490049 |                     |
| TS7-L6                    | 1.200263 | 1.267849 | 1.098989  | -4531.564707 | -4530.296858 | -4530.465718 | 328.7i              |
| INT8-L6                   | 1.201003 | 1.269052 | 1.098248  | -4531.600096 | -4530.331044 | -4530.501848 |                     |
| 3a                        | 0.288646 | 0.303474 | 0.247769  | -674.423724  | -674.120250  | -674.175955  |                     |
| INT1-L2                   | 0.867074 | 0.916049 | 0.786591  | -3494.189468 | -3493.273419 | -3493.402877 |                     |
| INT2-L2                   | 0.763488 | 0.808882 | 0.688561  | -3742.986870 | -3742.177988 | -3742.298309 |                     |
| TS3-L2                    | 0.763200 | 0.808235 | 0.687877  | -3742.971478 | -3742.163243 | -3742.283601 | 206.5i              |
| INT4-L2                   | 0.764161 | 0.810141 | 0.686417  | -3743.000646 | -3742.190506 | -3742.314230 |                     |
| INT5-L2                   | 0.961057 | 1.016670 | 0.875286  | -4186.001763 | -4184.985093 | -4185.126477 |                     |
| INT6-L2                   | 0.961220 | 1.015177 | 0.875798  | -3725.664913 | -3724.649736 | -3724.789115 |                     |
| TS7-L2                    | 0.961091 | 1.014354 | 0.877069  | -3725.634700 | -3724.620346 | -3724.757631 | 543.3i              |
| INT8-L2                   | 0.962557 | 1.016120 | 0.878859  | -3725.665868 | -3724.649748 | -3724.787009 |                     |
| INT1-L4                   | 1.346170 | 1.423685 | 1.232635  | -5106.065290 | -5104.641605 | -5104.832655 |                     |
| INT2-L4                   | 1.242231 | 1.316782 | 1.129590  | -5354.842218 | -5353.525436 | -5353.712628 |                     |
| TS3-L4                    | 1.241475 | 1.315672 | 1.129221  | -5354.829389 | -5353.513717 | -5353.700168 | 145.0i              |
| INT4-L4                   | 1.242994 | 1.317575 | 1.130127  | -5354.858935 | -5353.54136  | -5353.728808 |                     |
| INT5-L4                   | 1.440047 | 1.523845 | 1.320779  | -5797.846987 | -5796.323142 | -5796.526208 |                     |
| INT6-L4                   | 1.439750 | 1.522440 | 1.319246  | -5337.516653 | -5335.994213 | -5336.197407 |                     |
| TS7-L4                    | 1.439431 | 1.521404 | 1.321363  | -5337.490765 | -5335.969361 | -5336.169402 | 335.5i              |
| INT8-L4                   | 1.440793 | 1.522962 | 1.322456  | -5337.516558 | -5335.993596 | -5336.194102 |                     |

\*-L6, -L2, -L4 stands for species coordinated by ligand L6, L2 and L4 separately.

### Cartesian Coordinates of the Structures

#### INT1-L6

|   |            |             |             |
|---|------------|-------------|-------------|
| C | 0.18934600 | -0.00221800 | -0.93432400 |
| N | 1.34122400 | 0.37767000  | -1.65439100 |

---

|   |             |             |             |
|---|-------------|-------------|-------------|
| N | 0.73114100  | -0.45802600 | 0.29061400  |
| C | 1.28890600  | 1.09206000  | -2.88263100 |
| C | 1.22650600  | 2.50164300  | -5.27399700 |
| C | 1.19440100  | 2.49558900  | -2.84799700 |
| C | 1.36272500  | 0.38492200  | -4.09663400 |
| C | 1.32621000  | 1.11409500  | -5.28763900 |
| C | 1.16040200  | 3.18311400  | -4.06460500 |
| H | 1.36806800  | 0.58444300  | -6.24504400 |
| H | 1.06885500  | 4.27471300  | -4.06174200 |
| C | -0.11111100 | -0.79377900 | 1.38365100  |
| C | -1.74873300 | -1.46880500 | 3.55035300  |
| C | -0.37515800 | 0.16593000  | 2.37151100  |
| C | -0.71599600 | -2.06272700 | 1.42420900  |
| C | -1.51677200 | -2.38399900 | 2.51808000  |
| C | -1.19283400 | -0.19393200 | 3.44513500  |
| H | -2.00903300 | -3.36319900 | 2.55127700  |
| H | -1.45484000 | 0.56649100  | 4.19210700  |
| C | -0.54811100 | -2.96502100 | 0.21683000  |
| H | -0.78488400 | -2.29030800 | -0.63819800 |
| C | 0.11716400  | 1.59193300  | 2.19615500  |
| C | -2.61153800 | -1.82701800 | 4.72206000  |
| H | -3.30062000 | -1.00453200 | 4.97489200  |
| C | 1.38321800  | -1.12638500 | -4.10495800 |
| H | 1.81808500  | -1.45027900 | -3.14111100 |
| C | 1.05521500  | 3.24910100  | -1.54316300 |
| H | 1.31295400  | 2.54653000  | -0.73065500 |
| C | 2.23604100  | -1.72246500 | -5.21480600 |
| H | 1.79615200  | -1.55246600 | -6.21349400 |
| H | 2.31495100  | -2.81543700 | -5.08597500 |
| H | 3.25784800  | -1.30595200 | -5.21922900 |

---

|    |             |             |             |
|----|-------------|-------------|-------------|
| C  | -0.39719100 | 3.66432100  | -1.32392400 |
| H  | -0.74721800 | 4.33804100  | -2.12758600 |
| H  | -0.51651200 | 4.18747600  | -0.35799200 |
| H  | -1.04455800 | 2.76596400  | -1.30770700 |
| Ni | -1.51849500 | 0.23389700  | -1.28633000 |
| H  | -2.00848100 | -2.03117100 | 5.62457700  |
| H  | -3.21537500 | -2.72563500 | 4.52077800  |
| C  | -1.02321900 | 2.57163900  | 2.42243200  |
| C  | -1.03527000 | 3.54598600  | 3.42024900  |
| C  | -2.12663000 | 2.46093900  | 1.56353700  |
| C  | -2.13989100 | 4.39084300  | 3.56386400  |
| H  | -0.17577000 | 3.65229200  | 4.09146400  |
| C  | -3.22772300 | 3.29416000  | 1.71160700  |
| H  | -2.10300500 | 1.71580800  | 0.75283300  |
| C  | -3.23698800 | 4.26448400  | 2.71666400  |
| H  | -2.13874500 | 5.15291500  | 4.35037000  |
| H  | -4.08380900 | 3.16701400  | 1.03823500  |
| H  | -4.10363800 | 4.92219500  | 2.83827600  |
| C  | 0.87846200  | -3.42682400 | 0.02771000  |
| C  | 1.70209900  | -3.76832200 | 1.10437000  |
| C  | 1.40927800  | -3.49988900 | -1.26405100 |
| C  | 3.02600000  | -4.15378800 | 0.89790700  |
| H  | 1.30063500  | -3.70722000 | 2.12336400  |
| C  | 2.73312300  | -3.87480900 | -1.47445100 |
| H  | 0.76835000  | -3.22707900 | -2.11017400 |
| C  | 3.54984400  | -4.20067900 | -0.39178400 |
| H  | 3.66084400  | -4.39869900 | 1.75578300  |
| H  | 3.13461800  | -3.89770500 | -2.49350700 |
| H  | 4.59514500  | -4.48093700 | -0.55290500 |
| C  | 4.90769200  | -0.98777800 | 2.86220200  |

---

|   |             |             |             |
|---|-------------|-------------|-------------|
| C | 5.95253600  | -0.57468700 | 2.06173500  |
| C | 5.69315500  | -0.09547800 | 0.74334900  |
| C | 4.36238400  | -0.08295200 | 0.34013700  |
| C | 3.27255400  | -0.51443600 | 1.15692500  |
| C | 3.55229200  | -0.96394400 | 2.42750600  |
| H | 7.71343400  | 0.38609400  | 0.05868800  |
| H | 5.12064600  | -1.34292800 | 3.87572800  |
| H | 6.98258000  | -0.60715200 | 2.43337200  |
| C | 6.65011800  | 0.37596200  | -0.20480100 |
| C | 3.91891600  | 0.37293200  | -0.94161400 |
| H | 2.75661600  | -1.29469800 | 3.10313100  |
| C | 4.86490600  | 0.82595600  | -1.83622300 |
| C | 6.23420100  | 0.81705200  | -1.44415600 |
| H | 4.58095000  | 1.18804500  | -2.83003500 |
| H | 6.98097300  | 1.17689600  | -2.15937800 |
| C | 2.10027100  | -0.31076000 | 0.31798100  |
| C | 2.47877800  | 0.20504900  | -0.89418800 |
| C | 1.39592700  | 1.89968000  | 2.94516000  |
| C | 2.40676300  | 2.62738800  | 2.30694700  |
| C | 1.61737200  | 1.47599900  | 4.25967800  |
| C | 3.60677500  | 2.91291800  | 2.95321100  |
| H | 2.25436200  | 2.95459500  | 1.27105700  |
| C | 2.81213000  | 1.76869200  | 4.91478100  |
| H | 0.84569300  | 0.89318000  | 4.77358900  |
| C | 3.81433800  | 2.48384600  | 4.26228300  |
| H | 4.39017800  | 3.46263900  | 2.42242200  |
| H | 2.96478900  | 1.42424900  | 5.94275600  |
| H | 4.75969300  | 2.69875300  | 4.76998200  |
| C | -1.57436100 | -4.07412300 | 0.16409500  |
| C | -1.30403400 | -5.38409200 | 0.56764000  |

---

|   |             |             |             |
|---|-------------|-------------|-------------|
| C | -2.86978300 | -3.75654100 | -0.26714800 |
| C | -2.30734600 | -6.35380300 | 0.55422500  |
| H | -0.29303000 | -5.65022800 | 0.89503200  |
| C | -3.87183900 | -4.72106800 | -0.27525700 |
| H | -3.08899800 | -2.72971400 | -0.58734400 |
| C | -3.59455400 | -6.02503700 | 0.13695000  |
| H | -2.07795700 | -7.37574100 | 0.87359400  |
| H | -4.87830200 | -4.44841600 | -0.60681300 |
| H | -4.38226900 | -6.78520000 | 0.12909500  |
| C | 2.01102700  | 4.42974500  | -1.43746400 |
| H | 3.05911300  | 4.12005000  | -1.59212300 |
| H | 1.77903600  | 5.21889300  | -2.17410800 |
| H | 1.93585700  | 4.89343300  | -0.43884500 |
| C | -0.05237200 | -1.64578300 | -4.16248400 |
| H | -0.54390400 | -1.31552200 | -5.09579800 |
| H | -0.08069400 | -2.75035500 | -4.13996600 |
| H | -0.64279300 | -1.25499200 | -3.30989900 |
| H | 1.19456400  | 3.05644400  | -6.21711500 |
| C | -4.88546500 | -0.52534700 | 1.58050800  |
| C | -3.97147800 | -0.27619100 | 0.57238200  |
| C | -4.26266500 | 0.57802400  | -0.52768000 |
| C | -5.56539400 | 1.16415000  | -0.54492800 |
| C | -6.46908800 | 0.89204200  | 0.48130900  |
| C | -6.15730100 | 0.05987600  | 1.55616700  |
| H | -4.59545500 | -1.19225900 | 2.40277700  |
| H | -2.96494700 | -0.71283700 | 0.60289200  |
| C | -5.94437800 | 2.05830400  | -1.69409400 |
| H | -7.46412300 | 1.35582900  | 0.42463000  |
| H | -6.88725500 | -0.13430500 | 2.34812600  |
| C | -5.10054900 | 1.73232500  | -2.91133000 |

---

|   |             |            |             |
|---|-------------|------------|-------------|
| C | -3.62457500 | 1.74231000 | -2.53480500 |
| H | -7.02499000 | 1.96361800 | -1.91094900 |
| H | -5.35423700 | 0.72197200 | -3.28997200 |
| N | -3.31267300 | 0.79363800 | -1.48087400 |
| C | -2.74462600 | 1.48210700 | -3.74364400 |
| H | -3.00753600 | 0.50858400 | -4.19684200 |
| H | -2.85267000 | 2.27166000 | -4.50948700 |
| H | -1.68640900 | 1.41519200 | -3.43090300 |
| H | -3.39786100 | 2.78167800 | -2.17754400 |
| H | -5.28694500 | 2.44565300 | -3.73556100 |
| H | -5.78484100 | 3.12471100 | -1.42783000 |

**Chlorobenzene**

|    |            |             |             |
|----|------------|-------------|-------------|
| C  | 0.00000000 | 1.21359200  | -0.17513100 |
| C  | 0.00000000 | 1.20541100  | -1.56778900 |
| C  | 0.00000000 | 0.00000000  | -2.26705700 |
| C  | 0.00000000 | -1.20541100 | -1.56778900 |
| C  | 0.00000000 | -1.21359200 | -0.17513100 |
| C  | 0.00000000 | 0.00000000  | 0.50938600  |
| H  | 0.00000000 | 2.15037300  | 0.38759700  |
| H  | 0.00000000 | 2.15517200  | -2.11033500 |
| H  | 0.00000000 | -2.15517200 | -2.11033500 |
| H  | 0.00000000 | -2.15037300 | 0.38759700  |
| Cl | 0.00000000 | 0.00000000  | 2.25099700  |
| H  | 0.00000000 | 0.00000000  | -3.36041500 |

**Tetrahydroquinoline anion**

|   |            |             |             |
|---|------------|-------------|-------------|
| C | 2.71094200 | -1.07924900 | 0.09987800  |
| C | 1.40627500 | -1.52742600 | 0.01968200  |
| C | 0.27902600 | -0.63931000 | -0.09456500 |
| C | 0.62218300 | 0.76929500  | -0.09715300 |
| C | 1.94368900 | 1.18503600  | -0.00061400 |

---

|   |             |             |             |
|---|-------------|-------------|-------------|
| C | 3.01854400  | 0.29177100  | 0.08929000  |
| H | 3.52286900  | -1.81634600 | 0.17770200  |
| H | 1.17247900  | -2.59935300 | 0.03450700  |
| C | -0.50949300 | 1.76005000  | -0.17089500 |
| H | 2.14059300  | 2.26923800  | 0.00740800  |
| H | 4.05185900  | 0.64861700  | 0.15867000  |
| C | -1.78605100 | 1.13677300  | 0.36900500  |
| C | -2.02653500 | -0.20760400 | -0.32239800 |
| H | -0.24837800 | 2.68744000  | 0.37681600  |
| H | -1.68086500 | 0.94789600  | 1.45734900  |
| N | -0.94816700 | -1.13981800 | -0.17501900 |
| C | -3.30831200 | -0.85353200 | 0.18159900  |
| H | -3.21728600 | -1.05235300 | 1.26523800  |
| H | -4.20188900 | -0.22365900 | 0.00885400  |
| H | -3.45199600 | -1.82795800 | -0.31395800 |
| H | -2.20093000 | 0.04042500  | -1.40783700 |
| H | -2.65486100 | 1.81254100  | 0.23746500  |
| H | -0.69602800 | 2.07741400  | -1.22006000 |

**INT2-L6**

|   |             |             |             |
|---|-------------|-------------|-------------|
| C | 0.62088800  | -0.22542300 | -0.43640400 |
| N | 0.15003700  | -0.87153700 | -1.55210600 |
| N | -0.48869700 | 0.38671300  | 0.11019500  |
| C | 0.93702800  | -1.70233100 | -2.41290800 |
| C | 2.28589200  | -3.35885600 | -4.16437800 |
| C | 1.25507300  | -3.00717400 | -1.99591000 |
| C | 1.33366000  | -1.18816200 | -3.65893900 |
| C | 2.00755300  | -2.04688100 | -4.53090900 |
| C | 1.92837300  | -3.82656200 | -2.90530000 |
| H | 2.32920300  | -1.68103200 | -5.51026000 |
| H | 2.18907400  | -4.84883400 | -2.61718500 |

---

|    |             |             |             |
|----|-------------|-------------|-------------|
| C  | -0.39529400 | 0.99454800  | 1.39804900  |
| C  | 0.04057500  | 2.04879000  | 3.93754500  |
| C  | -0.71327100 | 0.21852600  | 2.51785900  |
| C  | 0.14732000  | 2.28865700  | 1.51103700  |
| C  | 0.35613600  | 2.79195300  | 2.79105200  |
| C  | -0.48479200 | 0.76704500  | 3.78333100  |
| H  | 0.80510200  | 3.78385200  | 2.91170100  |
| H  | -0.69050000 | 0.15762500  | 4.67217400  |
| C  | 0.54416700  | 3.00785000  | 0.23429900  |
| H  | 1.18457300  | 2.27439300  | -0.29650000 |
| C  | -1.25520800 | -1.18811300 | 2.34126200  |
| H  | -0.95801200 | -1.51413900 | 1.32846700  |
| C  | 0.27215900  | 2.63251300  | 5.29731900  |
| H  | 0.25952400  | 1.85995300  | 6.08050900  |
| C  | 1.14204100  | 0.27681600  | -3.98810800 |
| H  | 0.21087200  | 0.61812200  | -3.49711900 |
| C  | 0.88902600  | -3.49852500 | -0.61085100 |
| H  | 0.97649000  | -2.62383200 | 0.06116400  |
| C  | 1.00151400  | 0.56544800  | -5.47424800 |
| H  | 1.94378300  | 0.38571000  | -6.02008700 |
| H  | 0.74131800  | 1.62498100  | -5.63210800 |
| H  | 0.21549200  | -0.04993200 | -5.94243000 |
| C  | 1.84900600  | -4.55012200 | -0.07570900 |
| H  | 1.73129500  | -5.52130800 | -0.58809700 |
| H  | 1.65370300  | -4.72497600 | 0.99585900  |
| H  | 2.89848000  | -4.22938900 | -0.18867900 |
| Ni | 2.36170700  | -0.02033500 | 0.17881900  |
| H  | -0.50586000 | 3.37280200  | 5.55217500  |
| H  | 1.23842800  | 3.15899800  | 5.35009400  |
| C  | -0.57918600 | -2.18543900 | 3.26505500  |



---

|   |             |             |             |
|---|-------------|-------------|-------------|
| C | -1.24436400 | -2.87078700 | 4.28166900  |
| C | 0.78157300  | -2.44571900 | 3.04831900  |
| C | -0.56383000 | -3.80081100 | 5.07057100  |
| H | -2.30993500 | -2.68731600 | 4.45449700  |
| C | 1.45441900  | -3.38058600 | 3.82656800  |
| H | 1.31022900  | -1.89494600 | 2.25547400  |
| C | 0.78319000  | -4.06256000 | 4.84344400  |
| H | -1.09901000 | -4.33093700 | 5.86411400  |
| H | 2.51331800  | -3.58435800 | 3.63270700  |
| H | 1.31220200  | -4.79956900 | 5.45463200  |
| C | -0.64277700 | 3.29225100  | -0.66751900 |
| C | -1.86068800 | 3.76267800  | -0.16974400 |
| C | -0.51556700 | 3.09744500  | -2.04606300 |
| C | -2.92544700 | 4.02808800  | -1.02985100 |
| H | -1.98691700 | 3.90065300  | 0.91111500  |
| C | -1.58187800 | 3.34485500  | -2.90585800 |
| H | 0.43909700  | 2.72996300  | -2.43999900 |
| C | -2.79374300 | 3.81287000  | -2.39926200 |
| H | -3.87561200 | 4.38774600  | -0.62229200 |
| H | -1.46682300 | 3.16620400  | -3.97985900 |
| H | -3.63624800 | 4.00242400  | -3.07060300 |
| C | -5.34754800 | 1.04018700  | -0.51649600 |
| C | -5.70986500 | 0.38134700  | -1.67403300 |
| C | -4.73237800 | -0.32926400 | -2.42771100 |
| C | -3.42934400 | -0.30401700 | -1.93238400 |
| C | -3.04439900 | 0.38170700  | -0.74251300 |
| C | -4.01217500 | 1.05026800  | -0.02969800 |
| H | -5.94225700 | -1.11527000 | -4.06582100 |
| H | -6.11338400 | 1.57018600  | 0.05802400  |
| H | -6.74994600 | 0.39660300  | -2.01595500 |

---

|    |             |             |             |
|----|-------------|-------------|-------------|
| C  | -4.93893600 | -1.06408500 | -3.63025700 |
| C  | -2.33210700 | -0.96715500 | -2.55998700 |
| H  | -3.77566800 | 1.57676600  | 0.89998000  |
| C  | -2.56095200 | -1.67497600 | -3.71929700 |
| C  | -3.88296800 | -1.70907400 | -4.24272400 |
| H  | -1.75244000 | -2.20464900 | -4.23413700 |
| H  | -4.06361200 | -2.26986500 | -5.16442100 |
| C  | -1.61378900 | 0.12440400  | -0.64409700 |
| C  | -1.20774200 | -0.66203700 | -1.69115600 |
| C  | 4.31044000  | 0.02423300  | -0.13381400 |
| C  | 3.96318500  | 0.77700100  | 1.02533500  |
| C  | 3.76902900  | 0.10413900  | 2.25927500  |
| C  | 4.00894100  | -1.25869200 | 2.36829100  |
| C  | 4.36853300  | -2.01440200 | 1.23739000  |
| C  | 4.46756300  | -1.37890600 | 0.00722200  |
| H  | 4.62004700  | 0.50139300  | -1.07031400 |
| H  | 3.97767100  | 1.87279100  | 1.01111700  |
| H  | 3.90464000  | -1.75376100 | 3.33832600  |
| H  | 4.54874900  | -3.09083100 | 1.30950000  |
| Cl | 4.84572100  | -2.31191800 | -1.41984500 |
| C  | -2.77097300 | -1.24579600 | 2.35924100  |
| C  | -3.42697400 | -2.10168600 | 1.46732700  |
| C  | -3.54477300 | -0.48242800 | 3.23823100  |
| C  | -4.81549100 | -2.19076300 | 1.44704800  |
| H  | -2.83126500 | -2.69619000 | 0.76467000  |
| C  | -4.93620800 | -0.57455400 | 3.22670900  |
| H  | -3.05470600 | 0.20318600  | 3.93750200  |
| C  | -5.57647400 | -1.42631400 | 2.32945800  |
| H  | -5.30628400 | -2.85393500 | 0.72843800  |
| H  | -5.52452100 | 0.03008600  | 3.92372000  |

---

|               |             |             |             |
|---------------|-------------|-------------|-------------|
| H             | -6.66842700 | -1.49091500 | 2.31414700  |
| C             | 1.40584500  | 4.24058300  | 0.40235400  |
| C             | 0.91325500  | 5.43248600  | 0.94695400  |
| C             | 2.72834200  | 4.21511400  | -0.05126000 |
| C             | 1.72906600  | 6.55443200  | 1.06131500  |
| H             | -0.13014300 | 5.48648000  | 1.27654100  |
| C             | 3.54773200  | 5.33772700  | 0.05763700  |
| H             | 3.11219900  | 3.29504000  | -0.50974200 |
| C             | 3.05138000  | 6.50995400  | 0.62050000  |
| H             | 1.32640300  | 7.47637200  | 1.49141000  |
| H             | 4.57876000  | 5.29556500  | -0.30571800 |
| H             | 3.69040300  | 7.39343400  | 0.70743400  |
| C             | -0.55022700 | -4.00328400 | -0.55750100 |
| H             | -1.27207000 | -3.24774800 | -0.91353700 |
| H             | -0.67113500 | -4.89819800 | -1.19365500 |
| H             | -0.82617300 | -4.28271900 | 0.47496700  |
| C             | 2.30369900  | 1.06825300  | -3.38402400 |
| H             | 3.26420100  | 0.70944200  | -3.79607500 |
| H             | 2.21937500  | 2.14521600  | -3.61525500 |
| H             | 2.34583500  | 0.94266500  | -2.28512100 |
| H             | 2.80858500  | -4.01963000 | -4.86224900 |
| H             | 3.48404400  | 0.68130500  | 3.14405200  |
| <b>TS3-L6</b> |             |             |             |
| C             | 0.50157600  | -0.18695100 | -0.65191500 |
| N             | -0.49612500 | 0.35130100  | 0.13308400  |
| N             | -0.16639100 | -0.99184400 | -1.54696600 |
| C             | -0.22440500 | 1.17182300  | 1.26988000  |
| C             | 0.26830800  | 2.74245200  | 3.52212100  |
| C             | -0.03195200 | 2.55738300  | 1.10564500  |
| C             | -0.12801200 | 0.55645800  | 2.52278800  |

---

|   |             |             |             |
|---|-------------|-------------|-------------|
| C | 0.12353300  | 1.36252200  | 3.63786400  |
| C | 0.20023900  | 3.31922300  | 2.24686700  |
| H | 0.24156100  | 0.88874300  | 4.62007000  |
| H | 0.36026000  | 4.39862900  | 2.14472700  |
| C | 0.48203400  | -1.85856900 | -2.48037000 |
| C | 1.75789200  | -3.54137300 | -4.26053900 |
| C | 0.76871200  | -1.38168900 | -3.76994400 |
| C | 0.78216100  | -3.16910500 | -2.07090700 |
| C | 1.43320700  | -3.99869700 | -2.98762800 |
| C | 1.42436900  | -2.24777500 | -4.64892500 |
| H | 1.69564400  | -5.02088000 | -2.69665700 |
| H | 1.67517500  | -1.90429700 | -5.65742300 |
| C | 0.47046200  | -3.65104900 | -0.66962800 |
| H | -0.29664800 | -2.97455100 | -0.24906500 |
| C | 0.43051900  | 0.03704900  | -4.17055100 |
| H | -0.39697100 | 0.36920500  | -3.51707700 |
| C | -0.24491800 | -0.95155500 | 2.65115100  |
| H | -0.03348600 | -1.36951300 | 1.65113700  |
| C | -0.02472800 | 3.15298800  | -0.29487200 |
| H | 0.70003200  | 2.52999200  | -0.85825400 |
| C | 0.51783100  | 3.60448000  | 4.72076400  |
| H | 0.69071400  | 3.00538800  | 5.62697700  |
| C | 1.70681700  | -3.53592600 | 0.21795600  |
| H | 2.10766800  | -2.50546700 | 0.19131900  |
| H | 2.50660500  | -4.21442400 | -0.12797200 |
| H | 1.46957900  | -3.79033000 | 1.26640400  |
| C | -0.05506000 | 0.16009600  | -5.60740700 |
| H | -0.41416700 | 1.18535900  | -5.79878500 |
| H | -0.88283800 | -0.53579500 | -5.82260900 |
| H | 0.75025400  | -0.03462500 | -6.33653200 |

---

|    |             |             |             |
|----|-------------|-------------|-------------|
| Ni | 2.36563900  | -0.01241100 | -0.49279800 |
| H  | 1.39462200  | 4.25472300  | 4.56930500  |
| H  | -0.33870800 | 4.27124800  | 4.91815100  |
| C  | 0.86063400  | -1.50077100 | 3.53449100  |
| C  | 2.17299400  | -1.39060100 | 3.05487700  |
| C  | 0.64134800  | -2.09663600 | 4.77588700  |
| C  | 3.24189600  | -1.86325000 | 3.80431200  |
| H  | 2.33914500  | -0.93800600 | 2.06432200  |
| C  | 1.71768800  | -2.56636200 | 5.53231700  |
| H  | -0.38009900 | -2.20299100 | 5.15628000  |
| C  | 3.01753500  | -2.45069300 | 5.05126100  |
| H  | 4.25820500  | -1.77857300 | 3.40714300  |
| H  | 1.53264400  | -3.03163800 | 6.50522700  |
| H  | 3.85875500  | -2.82322400 | 5.64315600  |
| C  | -1.35990600 | 3.01442500  | -0.99578200 |
| C  | -2.56956000 | 3.25242200  | -0.33820600 |
| C  | -1.39548300 | 2.65663000  | -2.34631900 |
| C  | -3.78450300 | 3.11639900  | -1.00861000 |
| H  | -2.55849900 | 3.53202400  | 0.72264900  |
| C  | -2.60640400 | 2.50052800  | -3.01504200 |
| H  | -0.44889300 | 2.48493100  | -2.87144200 |
| C  | -3.80852700 | 2.72660900  | -2.34511000 |
| H  | -4.72289300 | 3.29478900  | -0.47419700 |
| H  | -2.61036800 | 2.19458100  | -4.06645900 |
| H  | -4.76255700 | 2.59735000  | -2.86428900 |
| C  | -4.59014400 | -2.71098500 | -2.82550500 |
| C  | -5.51802400 | -2.16199900 | -1.96324600 |
| C  | -5.10369800 | -1.26626700 | -0.93610700 |
| C  | -3.73920200 | -0.98849400 | -0.86807900 |
| C  | -2.77448100 | -1.54940200 | -1.75784400 |

---

|    |             |             |             |
|----|-------------|-------------|-------------|
| C  | -3.20117400 | -2.41620700 | -2.73908800 |
| H  | -7.00851700 | -0.81011800 | 0.02856600  |
| H  | -4.92927500 | -3.39837700 | -3.60598600 |
| H  | -6.57878800 | -2.41463400 | -2.06299100 |
| C  | -5.92875500 | -0.62862200 | 0.03367800  |
| C  | -3.15167000 | -0.11621800 | 0.09603000  |
| H  | -2.49834000 | -2.87317200 | -3.44346500 |
| C  | -3.97254200 | 0.47580300  | 1.02789300  |
| C  | -5.36730300 | 0.20556900  | 0.97928700  |
| H  | -3.57533000 | 1.14636500  | 1.79632700  |
| H  | -6.01417200 | 0.67797400  | 1.72479700  |
| C  | -1.52087200 | -0.97328000 | -1.30344800 |
| C  | -1.73312900 | -0.13780500 | -0.23860100 |
| C  | 4.90592300  | -0.66005700 | 0.71311500  |
| C  | 5.47238000  | -1.92466300 | 0.71818000  |
| C  | 5.36651700  | -2.76768700 | -0.40098300 |
| C  | 4.69485000  | -2.33726900 | -1.53770900 |
| C  | 4.10948200  | -1.06386700 | -1.57928400 |
| C  | 4.18373400  | -0.25221500 | -0.42565200 |
| H  | 4.98171700  | 0.00902600  | 1.57644100  |
| H  | 6.01236800  | -2.26912200 | 1.60654300  |
| H  | 4.63480700  | -2.98313500 | -2.42022100 |
| H  | 3.69413900  | -0.67770600 | -2.51539600 |
| Cl | 3.92813200  | 1.68093700  | -0.63741400 |
| H  | 2.27043300  | -4.20515700 | -4.96328100 |
| C  | -0.11450000 | -5.05588900 | -0.63985200 |
| H  | -0.99729600 | -5.14382900 | -1.29496600 |
| H  | 0.61985400  | -5.81731300 | -0.95377400 |
| H  | -0.42340100 | -5.31891400 | 0.38566300  |
| C  | 1.62257400  | 0.95684100  | -3.91220500 |

---

|   |             |             |             |
|---|-------------|-------------|-------------|
| H | 2.49007500  | 0.64825700  | -4.52381200 |
| H | 1.38752300  | 2.00212000  | -4.17911900 |
| H | 1.92920100  | 0.93085600  | -2.85071700 |
| C | -1.63861100 | -1.42782600 | 3.00677900  |
| C | -2.14013100 | -2.57750500 | 2.38663500  |
| C | -2.44669800 | -0.77166400 | 3.94008100  |
| C | -3.41447500 | -3.05523100 | 2.67938700  |
| H | -1.51748800 | -3.09982600 | 1.64926600  |
| C | -3.71982400 | -1.25163300 | 4.24341900  |
| H | -2.08030300 | 0.13600300  | 4.43141200  |
| C | -4.20998600 | -2.39226100 | 3.61170900  |
| H | -3.79026200 | -3.94790900 | 2.17085000  |
| H | -4.33668800 | -0.72407900 | 4.97743100  |
| H | -5.21337400 | -2.76195100 | 3.84198400  |
| C | 0.51723900  | 4.57077200  | -0.33395100 |
| C | -0.30855500 | 5.69829500  | -0.32577400 |
| C | 1.90402600  | 4.76010300  | -0.34100900 |
| C | 0.23833900  | 6.98124700  | -0.31289200 |
| H | -1.39627200 | 5.57739600  | -0.33795900 |
| C | 2.45190900  | 6.03890200  | -0.32949200 |
| H | 2.55924800  | 3.88157000  | -0.35197800 |
| C | 1.61928600  | 7.15694200  | -0.31287000 |
| H | -0.42516900 | 7.85133600  | -0.30854500 |
| H | 3.53893300  | 6.16233800  | -0.33796400 |
| H | 2.04712400  | 8.16378200  | -0.30679500 |
| H | 5.83331000  | -3.75653000 | -0.38102400 |

**INT4-L6**

|   |             |             |             |
|---|-------------|-------------|-------------|
| C | 0.52560600  | -0.06585000 | -0.64244700 |
| N | -0.59583100 | 0.13244300  | 0.11571100  |
| N | 0.26812400  | -1.19664100 | -1.36899900 |

---

|   |             |             |             |
|---|-------------|-------------|-------------|
| C | -0.73494900 | 1.16400500  | 1.10202300  |
| C | -0.99089000 | 3.14030100  | 3.04259300  |
| C | -1.24313500 | 2.41880800  | 0.72575900  |
| C | -0.30661100 | 0.89212500  | 2.40501200  |
| C | -0.44137800 | 1.90032100  | 3.36249100  |
| C | -1.38130000 | 3.38193800  | 1.72021900  |
| H | -0.08176100 | 1.71613000  | 4.38214700  |
| H | -1.76510100 | 4.37301700  | 1.45264800  |
| C | 1.21209200  | -1.79365000 | -2.26399600 |
| C | 3.07522100  | -2.90782000 | -3.96592500 |
| C | 1.30583600  | -1.29674200 | -3.57427400 |
| C | 2.00811300  | -2.85165600 | -1.78822700 |
| C | 2.94516000  | -3.39632600 | -2.66893200 |
| C | 2.26370000  | -1.87126300 | -4.41438600 |
| H | 3.59150700  | -4.21211100 | -2.33207200 |
| H | 2.37487700  | -1.49856700 | -5.43740300 |
| C | 1.90048200  | -3.32649200 | -0.35413600 |
| H | 0.86417500  | -3.12994000 | -0.02129100 |
| C | 0.45096600  | -0.13773400 | -4.03391600 |
| H | -0.42078100 | -0.09278900 | -3.35689100 |
| C | 0.30610500  | -0.45486100 | 2.74772700  |
| H | 0.75013200  | -0.84444000 | 1.81443200  |
| C | -1.52594700 | 2.71217600  | -0.73975400 |
| H | -0.62413100 | 2.35530300  | -1.27358400 |
| C | -1.10720600 | 4.22410700  | 4.06884500  |
| H | -1.00007400 | 3.83392400  | 5.09192100  |
| C | 2.83520200  | -2.52259700 | 0.54917100  |
| H | 2.63873700  | -1.43551900 | 0.48623900  |
| H | 3.89042100  | -2.67555700 | 0.26146500  |
| H | 2.72207500  | -2.81973600 | 1.60649800  |



---

|    |             |             |             |
|----|-------------|-------------|-------------|
| C  | -0.08810000 | -0.31223900 | -5.44660600 |
| H  | -0.81087600 | 0.48865600  | -5.67640400 |
| H  | -0.60183300 | -1.27940700 | -5.57320800 |
| H  | 0.70947500  | -0.24867100 | -6.20658600 |
| Ni | 2.32220400  | 0.75579800  | -0.57983800 |
| H  | -0.32276500 | 4.98611000  | 3.92259400  |
| H  | -2.07447800 | 4.74654000  | 3.99745700  |
| C  | 1.48351300  | -0.32175000 | 3.69808600  |
| C  | 2.64213100  | 0.29939800  | 3.20978100  |
| C  | 1.47121800  | -0.79081500 | 5.01191600  |
| C  | 3.76087900  | 0.44692400  | 4.02043600  |
| H  | 2.65438400  | 0.67092300  | 2.17568400  |
| C  | 2.59395500  | -0.63608000 | 5.82798600  |
| H  | 0.58004000  | -1.29128600 | 5.40475300  |
| C  | 3.73943400  | -0.01886200 | 5.33630800  |
| H  | 4.65805900  | 0.92671600  | 3.61805500  |
| H  | 2.57016400  | -1.00901100 | 6.85645400  |
| H  | 4.61982200  | 0.09635000  | 5.97548500  |
| C  | -2.69746600 | 1.92996800  | -1.29554700 |
| C  | -3.87223900 | 1.73066900  | -0.56718000 |
| C  | -2.62515400 | 1.41489400  | -2.59404700 |
| C  | -4.93566100 | 1.01090100  | -1.11127600 |
| H  | -3.94728200 | 2.13689800  | 0.44903200  |
| C  | -3.67439000 | 0.67742100  | -3.13428000 |
| H  | -1.72106700 | 1.60116500  | -3.18629700 |
| C  | -4.83447800 | 0.46683600  | -2.38872400 |
| H  | -5.84480700 | 0.85606300  | -0.52174500 |
| H  | -3.58637800 | 0.26389200  | -4.14415200 |
| H  | -5.65990400 | -0.11722600 | -2.80581000 |
| C  | -3.03928000 | -4.76908000 | -2.10205900 |

---

|    |             |             |             |
|----|-------------|-------------|-------------|
| C  | -4.10624900 | -4.52483900 | -1.26051600 |
| C  | -4.10013300 | -3.38917100 | -0.40215700 |
| C  | -2.97987100 | -2.56110000 | -0.47434900 |
| C  | -1.87508600 | -2.80564800 | -1.34352500 |
| C  | -1.90322100 | -3.91597500 | -2.15794900 |
| H  | -6.00792000 | -3.62632900 | 0.63069300  |
| H  | -3.06266100 | -5.64918200 | -2.75115000 |
| H  | -4.96240100 | -5.20724000 | -1.24575700 |
| C  | -5.10640400 | -3.01291900 | 0.53168800  |
| C  | -2.80861500 | -1.38863500 | 0.31812700  |
| H  | -1.07785100 | -4.14810000 | -2.83870100 |
| C  | -3.78938800 | -1.05949300 | 1.22457400  |
| C  | -4.93964200 | -1.88931600 | 1.31568600  |
| H  | -3.69956700 | -0.17859300 | 1.86749900  |
| H  | -5.71676800 | -1.62310300 | 2.03849100  |
| C  | -0.97529200 | -1.70025700 | -1.06012500 |
| C  | -1.51469900 | -0.87167700 | -0.11059400 |
| C  | 5.17692900  | 1.46557200  | 0.11665300  |
| C  | 6.47642800  | 1.01383000  | -0.11169000 |
| C  | 6.73574200  | 0.06375100  | -1.10396300 |
| C  | 5.69526900  | -0.43773900 | -1.88335800 |
| C  | 4.39410500  | 0.02361400  | -1.66153800 |
| C  | 4.13473700  | 0.94322700  | -0.64484600 |
| H  | 4.96530500  | 2.21092900  | 0.89151800  |
| H  | 7.30228800  | 1.40228700  | 0.49365100  |
| H  | 5.89349700  | -1.16736000 | -2.67595600 |
| H  | 3.57237100  | -0.36363500 | -2.29357700 |
| Cl | 2.04579300  | 2.71060400  | 0.25357000  |
| H  | 3.81968800  | -3.34469500 | -4.63800900 |
| C  | 2.14429200  | -4.81917000 | -0.18924000 |

---

|   |             |             |             |
|---|-------------|-------------|-------------|
| H | 1.51910400  | -5.41732700 | -0.87246700 |
| H | 3.19935100  | -5.08736900 | -0.36913500 |
| H | 1.91043600  | -5.12778300 | 0.84294600  |
| C | 1.21813200  | 1.17712900  | -3.89596900 |
| H | 2.10598600  | 1.18245400  | -4.55332400 |
| H | 0.58745400  | 2.03868200  | -4.17655400 |
| H | 1.57056200  | 1.34178000  | -2.86079900 |
| C | -0.73189700 | -1.47678700 | 3.16734200  |
| C | -0.64101600 | -2.78662200 | 2.68520500  |
| C | -1.78517600 | -1.16058900 | 4.03118000  |
| C | -1.58034200 | -3.75192400 | 3.03876100  |
| H | 0.18379200  | -3.04942200 | 2.01130100  |
| C | -2.72117600 | -2.12583200 | 4.39764200  |
| H | -1.87950700 | -0.13837200 | 4.41437100  |
| C | -2.62620200 | -3.42338600 | 3.89845300  |
| H | -1.49583700 | -4.76584700 | 2.63627000  |
| H | -3.53795400 | -1.85859200 | 5.07534700  |
| H | -3.36907700 | -4.17680600 | 4.17605200  |
| C | -1.62062900 | 4.19750300  | -1.04652500 |
| C | -2.84225500 | 4.86827500  | -1.14986700 |
| C | -0.43667600 | 4.92863800  | -1.20629700 |
| C | -2.88193100 | 6.24024400  | -1.39706400 |
| H | -3.78017200 | 4.31363000  | -1.04471200 |
| C | -0.47669900 | 6.29715700  | -1.45579300 |
| H | 0.52461000  | 4.40885000  | -1.11339900 |
| C | -1.70003400 | 6.95948600  | -1.55053100 |
| H | -3.84799300 | 6.74811200  | -1.47594000 |
| H | 0.45868800  | 6.85132500  | -1.57846600 |
| H | -1.73126700 | 8.03503200  | -1.74867600 |
| H | 7.76039900  | -0.27989400 | -1.27546100 |

---

**INT5-L6**

|   |             |             |             |
|---|-------------|-------------|-------------|
| C | -0.12909000 | -0.29217000 | -0.83798900 |
| N | -0.77436500 | 0.41945300  | 0.16063500  |
| N | -1.12763300 | -0.62830100 | -1.72460800 |
| C | -0.15393800 | 0.74390700  | 1.41635100  |
| C | 1.23290200  | 1.20620000  | 3.79535100  |
| C | 0.57549300  | 1.94095400  | 1.56037800  |
| C | -0.27514500 | -0.17897200 | 2.47380400  |
| C | 0.44703600  | 0.06403800  | 3.64236900  |
| C | 1.25258900  | 2.14640800  | 2.76335100  |
| H | 0.41158000  | -0.67334300 | 4.45255900  |
| H | 1.85637600  | 3.05267000  | 2.88165500  |
| C | -1.05298400 | -1.43782400 | -2.91002200 |
| C | -1.22137700 | -3.01528400 | -5.18858700 |
| C | -1.07157600 | -0.81314100 | -4.17189400 |
| C | -1.13213300 | -2.84120200 | -2.76815000 |
| C | -1.20416600 | -3.61036800 | -3.93173800 |
| C | -1.15707600 | -1.63504700 | -5.30181700 |
| H | -1.25860500 | -4.69955800 | -3.85411100 |
| H | -1.16908700 | -1.17140900 | -6.29343900 |
| C | -1.21941800 | -3.51018100 | -1.40971500 |
| H | -0.58151400 | -2.92812000 | -0.71731600 |
| C | -1.02455300 | 0.68822600  | -4.36572500 |
| H | -0.73966700 | 1.13673100  | -3.40056700 |
| C | -1.24185000 | -1.35045800 | 2.38345500  |
| H | -1.33324400 | -1.61994400 | 1.31611300  |
| C | 0.66274200  | 2.92043900  | 0.40169200  |
| H | 0.94604400  | 2.30577800  | -0.47011300 |
| C | 2.07525300  | 1.39751800  | 5.01783700  |
| H | 1.62380900  | 0.92796800  | 5.90609900  |

---

|    |             |             |             |
|----|-------------|-------------|-------------|
| C  | -0.70967500 | -4.94434500 | -1.39948300 |
| H  | 0.28212600  | -5.03977400 | -1.86738300 |
| H  | -1.40687700 | -5.62826400 | -1.91594200 |
| H  | -0.62003200 | -5.30006000 | -0.35929100 |
| C  | -2.37280600 | 1.25879500  | -4.79712800 |
| H  | -2.27788400 | 2.34162200  | -4.98773200 |
| H  | -3.15475700 | 1.12602400  | -4.03319000 |
| H  | -2.72954700 | 0.78991400  | -5.73286300 |
| Ni | 1.75524300  | -0.41219400 | -1.01919500 |
| H  | 3.06786300  | 0.93536100  | 4.87381800  |
| H  | 2.24540800  | 2.46392200  | 5.23349300  |
| C  | -0.80881300 | -2.62910000 | 3.08723100  |
| C  | -0.21753800 | -3.65575000 | 2.34632300  |
| C  | -1.03326300 | -2.84190200 | 4.45364600  |
| C  | 0.13718300  | -4.86124800 | 2.94861800  |
| H  | -0.01125900 | -3.50187600 | 1.28054400  |
| C  | -0.66341200 | -4.03838400 | 5.06207700  |
| H  | -1.52793100 | -2.06778200 | 5.05010000  |
| C  | -0.08042900 | -5.05641300 | 4.30930100  |
| H  | 0.60474400  | -5.64207800 | 2.34101500  |
| H  | -0.84619500 | -4.18072000 | 6.13193000  |
| H  | 0.20172800  | -6.00128000 | 4.78403300  |
| C  | -0.66746100 | 3.55468600  | 0.04358700  |
| C  | -1.50106200 | 4.14672100  | 0.99710300  |
| C  | -1.05980100 | 3.58686300  | -1.30090800 |
| C  | -2.69045000 | 4.76831000  | 0.61895800  |
| H  | -1.22257200 | 4.10157600  | 2.05769300  |
| C  | -2.26048000 | 4.18469000  | -1.67636800 |
| H  | -0.39767000 | 3.12344800  | -2.04466100 |
| C  | -3.07885800 | 4.78294400  | -0.71838200 |

---

|   |             |             |             |
|---|-------------|-------------|-------------|
| H | -3.33259100 | 5.22398400  | 1.38065300  |
| H | -2.55908500 | 4.18563000  | -2.72976500 |
| H | -4.02313600 | 5.25160500  | -1.01288900 |
| C | -5.94802400 | -0.28573300 | -2.60774100 |
| C | -6.50561000 | 0.49959000  | -1.61762000 |
| C | -5.69111100 | 1.02609700  | -0.57620800 |
| C | -4.33291500 | 0.71381700  | -0.62987200 |
| C | -3.74466700 | -0.07163800 | -1.66440700 |
| C | -4.56000300 | -0.58764800 | -2.64883800 |
| H | -7.16897700 | 2.10816200  | 0.61428400  |
| H | -6.59226600 | -0.69052300 | -3.39426700 |
| H | -7.57955500 | 0.71530900  | -1.62371200 |
| C | -6.11453400 | 1.82568900  | 0.52445600  |
| C | -3.37823900 | 1.12320700  | 0.34960500  |
| H | -4.15579700 | -1.21223000 | -3.45387700 |
| C | -3.82224500 | 1.87903800  | 1.40752200  |
| C | -5.19998200 | 2.22729400  | 1.47422600  |
| H | -3.14204200 | 2.20979500  | 2.19622400  |
| H | -5.53898700 | 2.83069200  | 2.32267700  |
| C | -2.33659000 | -0.10898100 | -1.30475300 |
| C | -2.12044600 | 0.55555700  | -0.13037700 |
| C | 2.48687800  | -2.00536800 | 1.32449000  |
| C | 2.98185300  | -3.16662200 | 1.91515100  |
| C | 3.02837500  | -4.36425200 | 1.20036600  |
| C | 2.55459500  | -4.38152900 | -0.11028700 |
| C | 2.06680900  | -3.20994100 | -0.69674200 |
| C | 2.04510500  | -1.98400500 | -0.01065500 |
| H | 2.49809100  | -1.07861200 | 1.91013400  |
| H | 3.33779300  | -3.13494400 | 2.95156800  |
| H | 2.57893400  | -5.31246900 | -0.69110500 |

---

|    |             |             |             |
|----|-------------|-------------|-------------|
| H  | 1.73484900  | -3.24838200 | -1.74492700 |
| C  | 4.83457200  | 1.37146100  | 1.81559800  |
| C  | 4.01351400  | 0.84648000  | 0.83238500  |
| C  | 4.50730300  | 0.01816400  | -0.21440400 |
| C  | 5.90352200  | -0.30019400 | -0.16005700 |
| C  | 6.70143400  | 0.23360700  | 0.84811900  |
| C  | 6.20295800  | 1.08177900  | 1.83875900  |
| H  | 4.39619600  | 2.03709400  | 2.57163400  |
| H  | 2.94363400  | 1.08119600  | 0.82593400  |
| C  | 6.47792700  | -1.24256000 | -1.18232400 |
| H  | 7.76576900  | -0.04185000 | 0.85577300  |
| H  | 6.85896400  | 1.49469400  | 2.61133000  |
| C  | 5.37868600  | -2.08793300 | -1.80134300 |
| C  | 4.23023900  | -1.19494600 | -2.27168800 |
| H  | 7.00698700  | -0.68375000 | -1.98231500 |
| H  | 5.76641600  | -2.69220800 | -2.64257800 |
| N  | 3.67246000  | -0.43174800 | -1.17449500 |
| C  | 4.64248400  | -0.28731900 | -3.42824300 |
| H  | 5.39411100  | 0.45117100  | -3.09992500 |
| H  | 5.07229100  | -0.86896300 | -4.26548000 |
| H  | 3.77209600  | 0.28246200  | -3.78753100 |
| H  | 3.42847100  | -1.86243300 | -2.65123000 |
| H  | 4.97852600  | -2.79022600 | -1.04537000 |
| H  | 7.24926100  | -1.88096500 | -0.71234700 |
| Cl | 1.65130000  | 1.37511900  | -2.50067900 |
| H  | -1.28406400 | -3.63773600 | -6.08668500 |
| C  | -2.65485800 | -3.49538200 | -0.88559600 |
| H  | -3.05626900 | -2.47725200 | -0.76207100 |
| H  | -3.32317200 | -4.03174800 | -1.58390700 |
| H  | -2.71073200 | -4.00812800 | 0.09140800  |

---

|                 |             |             |             |
|-----------------|-------------|-------------|-------------|
| C               | 0.05539700  | 1.08550300  | -5.36650600 |
| H               | 0.20705900  | 2.17726900  | -5.33727600 |
| H               | 1.02041900  | 0.62169100  | -5.11340200 |
| H               | -0.22156300 | 0.81352800  | -6.40156100 |
| C               | 1.76409800  | 3.96053200  | 0.52792800  |
| C               | 2.95723800  | 3.77262700  | -0.17913600 |
| C               | 1.63746500  | 5.10050100  | 1.33210900  |
| C               | 4.00394900  | 4.68521100  | -0.05907800 |
| H               | 3.05975200  | 2.90080700  | -0.83519000 |
| C               | 2.68241300  | 6.01322900  | 1.45146200  |
| H               | 0.70439800  | 5.28176800  | 1.87623900  |
| C               | 3.87435800  | 5.80422000  | 0.75844500  |
| H               | 4.93318400  | 4.50665600  | -0.60834500 |
| H               | 2.56343600  | 6.89520900  | 2.08943900  |
| H               | 4.69938100  | 6.51751400  | 0.85395300  |
| C               | -2.63840800 | -0.96618000 | 2.85770200  |
| C               | -3.74630100 | -1.59354000 | 2.27753800  |
| C               | -2.86135600 | -0.06606200 | 3.90340500  |
| C               | -5.03754300 | -1.33025900 | 2.72227700  |
| H               | -3.58375500 | -2.29908400 | 1.45564000  |
| C               | -4.15317900 | 0.18944300  | 4.36284300  |
| H               | -2.01087900 | 0.45096200  | 4.36145800  |
| C               | -5.24675100 | -0.43869700 | 3.77329500  |
| H               | -5.88783700 | -1.82031500 | 2.23803300  |
| H               | -4.30409500 | 0.89583100  | 5.18566500  |
| H               | -6.26148600 | -0.22783700 | 4.12468900  |
| H               | 3.42576300  | -5.27460900 | 1.66290100  |
| <b>Chloride</b> |             |             |             |
| Cl              | 0.00000000  | 0.00000000  | 0.00000000  |

**INT6-L6**



---

|   |             |             |             |
|---|-------------|-------------|-------------|
| C | -0.06867100 | -0.49757300 | -0.47904900 |
| N | 0.85687300  | 0.07417000  | 0.35792600  |
| N | 0.46921900  | -1.70674900 | -0.83443000 |
| C | 0.76688100  | 1.42318200  | 0.83596400  |
| C | 0.49657900  | 4.06090400  | 1.67458500  |
| C | -0.04274300 | 1.70139700  | 1.94958800  |
| C | 1.46528600  | 2.42801500  | 0.14094600  |
| C | 1.29288500  | 3.74250600  | 0.57360400  |
| C | -0.13980900 | 3.02805900  | 2.36501700  |
| H | 1.77024100  | 4.55835100  | 0.02278200  |
| H | -0.75989400 | 3.27231600  | 3.23395800  |
| C | -0.12793500 | -2.60157700 | -1.77989100 |
| C | -1.06249000 | -4.47208100 | -3.58211900 |
| C | -1.00653600 | -3.59772100 | -1.31952400 |
| C | 0.22931100  | -2.46911800 | -3.13310600 |
| C | -0.24979900 | -3.43397000 | -4.02321400 |
| C | -1.45173000 | -4.54060300 | -2.24884600 |
| H | 0.02057600  | -3.37167200 | -5.08211700 |
| H | -2.12640200 | -5.33796300 | -1.92324500 |
| C | 1.10744700  | -1.33641600 | -3.62462100 |
| H | 1.16151300  | -0.58233200 | -2.81631800 |
| C | -1.45277000 | -3.65848100 | 0.12602300  |
| H | -1.33178400 | -2.63806400 | 0.53887800  |
| C | 2.38988900  | 2.05817600  | -1.01245400 |
| H | 1.99510800  | 1.12057900  | -1.43882300 |
| C | -0.76461600 | 0.56239800  | 2.65846100  |
| H | -1.22287900 | -0.04328200 | 1.84985900  |
| C | 0.28382900  | 5.48776500  | 2.07232500  |
| H | 1.15818600  | 6.11463500  | 1.83898500  |
| C | 0.50584400  | -0.64098700 | -4.84024900 |

---

|    |             |             |             |
|----|-------------|-------------|-------------|
| H  | -0.50185800 | -0.24931600 | -4.62143100 |
| H  | 0.42704400  | -1.31762400 | -5.70764000 |
| H  | 1.14045000  | 0.20417900  | -5.15710600 |
| C  | -0.57237400 | -4.60633900 | 0.93467800  |
| H  | -0.90171300 | -4.64164500 | 1.98760200  |
| H  | 0.48923000  | -4.30567500 | 0.91831500  |
| H  | -0.63648300 | -5.63254800 | 0.53128900  |
| Ni | -1.88741800 | -0.26089800 | -0.91862300 |
| H  | -0.57538700 | 5.91322200  | 1.52446100  |
| H  | 0.06307800  | 5.58478800  | 3.14624600  |
| C  | 2.45234500  | 3.02497800  | -2.18358000 |
| C  | 1.95923200  | 2.61787900  | -3.42698600 |
| C  | 3.05762100  | 4.28451800  | -2.10031800 |
| C  | 2.01057100  | 3.45479900  | -4.53892100 |
| H  | 1.52470200  | 1.61717400  | -3.52411500 |
| C  | 3.10305500  | 5.13079700  | -3.20525300 |
| H  | 3.52914400  | 4.60435300  | -1.16556300 |
| C  | 2.57060500  | 4.72449900  | -4.42761500 |
| H  | 1.60927300  | 3.10867500  | -5.49647800 |
| H  | 3.57314500  | 6.11430900  | -3.11301200 |
| H  | 2.60966400  | 5.38990600  | -5.29467700 |
| C  | 0.22472900  | -0.33444800 | 3.37436300  |
| C  | 1.12591800  | 0.19564300  | 4.30409700  |
| C  | 0.24073400  | -1.71117200 | 3.14128500  |
| C  | 2.01491600  | -0.63114600 | 4.98568700  |
| H  | 1.12025200  | 1.27527400  | 4.49720100  |
| C  | 1.14052700  | -2.54120600 | 3.80931900  |
| H  | -0.45920600 | -2.13700700 | 2.41144400  |
| C  | 2.02875700  | -2.00324700 | 4.73668700  |
| H  | 2.71040700  | -0.20011300 | 5.71276700  |

---

|   |             |             |             |
|---|-------------|-------------|-------------|
| H | 1.14626400  | -3.61539100 | 3.59930300  |
| H | 2.73779000  | -2.65107400 | 5.26046800  |
| C | 4.24108400  | -4.75933700 | -0.01950600 |
| C | 5.06805100  | -4.15729200 | 0.90916100  |
| C | 4.76352700  | -2.86132500 | 1.41073500  |
| C | 3.61019800  | -2.25542900 | 0.91071600  |
| C | 2.74659800  | -2.87459700 | -0.04006800 |
| C | 3.06437200  | -4.13178100 | -0.50845500 |
| H | 6.41326800  | -2.54577000 | 2.80552400  |
| H | 4.49300500  | -5.75672500 | -0.39110000 |
| H | 5.96222100  | -4.67764400 | 1.26773600  |
| C | 5.50020200  | -2.11894800 | 2.37783100  |
| C | 3.15431800  | -0.96407800 | 1.30984200  |
| H | 2.42873700  | -4.64795900 | -1.23627100 |
| C | 3.88353000  | -0.27381600 | 2.24869600  |
| C | 5.06258700  | -0.87216500 | 2.77270900  |
| H | 3.57715400  | 0.71710400  | 2.59543700  |
| H | 5.64018400  | -0.31376400 | 3.51581000  |
| C | 1.68785100  | -1.89481100 | -0.22146300 |
| C | 1.92685100  | -0.78119100 | 0.54316000  |
| C | -3.02525600 | 2.32876300  | -0.54366600 |
| C | -3.10578600 | 3.71249200  | -0.71607800 |
| C | -2.18043000 | 4.38111500  | -1.51734100 |
| C | -1.17707700 | 3.65070500  | -2.15103300 |
| C | -1.09117200 | 2.27070900  | -1.95945800 |
| C | -1.99775000 | 1.58672300  | -1.14227200 |
| H | -3.79266000 | 1.82584300  | 0.06049600  |
| H | -3.91282100 | 4.27053800  | -0.22807100 |
| H | -0.44014700 | 4.15465600  | -2.78905500 |
| H | -0.28618600 | 1.71755200  | -2.45548400 |

---

|   |             |             |             |
|---|-------------|-------------|-------------|
| C | -5.27141600 | -0.57942100 | 1.99438100  |
| C | -4.32156300 | -0.78358700 | 1.00649000  |
| C | -4.61295300 | -0.59270400 | -0.36369900 |
| C | -5.93192900 | -0.20422400 | -0.71032600 |
| C | -6.87471700 | -0.00980700 | 0.30156300  |
| C | -6.56649700 | -0.18844000 | 1.64721700  |
| H | -4.99683200 | -0.72448500 | 3.04482000  |
| H | -3.30743800 | -1.10735600 | 1.27548900  |
| C | -6.29315500 | 0.01890100  | -2.15267400 |
| H | -7.88466100 | 0.30708900  | 0.01269700  |
| H | -7.32578900 | -0.02523100 | 2.41743700  |
| C | -5.05638800 | 0.28065200  | -2.99297500 |
| C | -3.98037700 | -0.75986300 | -2.70109200 |
| H | -6.83344000 | -0.86587900 | -2.54613700 |
| H | -5.30256500 | 0.28394500  | -4.06938800 |
| N | -3.59821400 | -0.75701000 | -1.28939700 |
| C | -4.37195600 | -2.16485500 | -3.14049500 |
| H | -5.18245400 | -2.57362600 | -2.51226200 |
| H | -4.71217600 | -2.17955200 | -4.19072400 |
| H | -3.50874000 | -2.84548100 | -3.04667500 |
| H | -3.07651800 | -0.47603700 | -3.27764800 |
| H | -4.64239500 | 1.27679300  | -2.75067600 |
| H | -7.00958100 | 0.85540600  | -2.23282200 |
| H | -1.41810000 | -5.22427400 | -4.29218400 |
| C | 2.53061500  | -1.81192800 | -3.89948000 |
| H | 3.17241300  | -0.96485800 | -4.19945400 |
| H | 2.98221300  | -2.28316500 | -3.00961500 |
| H | 2.55119100  | -2.55280100 | -4.71803500 |
| C | -2.92670500 | -4.00987200 | 0.26843100  |
| H | -3.13970500 | -5.04779800 | -0.03980800 |

---

|               |             |             |             |
|---------------|-------------|-------------|-------------|
| H             | -3.23796000 | -3.91700600 | 1.32189900  |
| H             | -3.54974700 | -3.32343600 | -0.32888200 |
| C             | -1.92883200 | 0.99111300  | 3.54029200  |
| C             | -2.09182500 | 0.53707300  | 4.85220000  |
| C             | -2.92963000 | 1.80710800  | 2.99464700  |
| C             | -3.21310200 | 0.90076500  | 5.60043400  |
| H             | -1.34000400 | -0.11683100 | 5.30357300  |
| C             | -4.04517900 | 2.17238200  | 3.73807300  |
| H             | -2.82849500 | 2.15356700  | 1.96112600  |
| C             | -4.19143800 | 1.72206400  | 5.05012400  |
| H             | -3.31758500 | 0.53293100  | 6.62565700  |
| H             | -4.81576100 | 2.80029500  | 3.28024800  |
| H             | -5.06951700 | 2.00582300  | 5.63767800  |
| C             | 3.80578500  | 1.73911400  | -0.55390500 |
| C             | 4.50550200  | 0.70752400  | -1.18901700 |
| C             | 4.45566100  | 2.47343400  | 0.44083800  |
| C             | 5.81841100  | 0.41130500  | -0.83685100 |
| H             | 4.00082900  | 0.12082500  | -1.96779700 |
| C             | 5.77555500  | 2.18761800  | 0.78737500  |
| H             | 3.91755000  | 3.27048500  | 0.96624500  |
| C             | 6.46007800  | 1.15435500  | 0.15293100  |
| H             | 6.34263800  | -0.40983200 | -1.33485300 |
| H             | 6.26982300  | 2.77427400  | 1.56795600  |
| H             | 7.49174000  | 0.92251900  | 0.43319000  |
| H             | -2.24840200 | 5.46482700  | -1.65560300 |
| <b>TS7-L6</b> |             |             |             |
| C             | 0.13307200  | -0.49962600 | -0.44679300 |
| N             | 0.98484700  | 0.48377500  | 0.01324000  |
| N             | 0.88437400  | -1.22287200 | -1.33750700 |
| C             | 0.64353000  | 1.30732300  | 1.12955800  |

---

|   |             |             |             |
|---|-------------|-------------|-------------|
| C | -0.11189800 | 2.81497500  | 3.34694600  |
| C | 1.01527500  | 0.86967100  | 2.40706600  |
| C | -0.09580900 | 2.48607400  | 0.92940200  |
| C | -0.44091600 | 3.23371500  | 2.05165100  |
| C | 0.60490200  | 1.63013500  | 3.50575900  |
| H | -1.02229500 | 4.15370200  | 1.92179100  |
| H | 0.82752800  | 1.26829400  | 4.51699700  |
| C | 0.44846500  | -2.43714400 | -1.96244000 |
| C | -0.39159600 | -4.76930500 | -3.16841800 |
| C | 0.44936500  | -3.62264200 | -1.20229000 |
| C | 0.05935000  | -2.39332800 | -3.31017400 |
| C | -0.35948400 | -3.58831400 | -3.90093500 |
| C | 0.01006400  | -4.78646300 | -1.83719900 |
| H | -0.67764600 | -3.59388100 | -4.94745900 |
| H | -0.02331800 | -5.72571100 | -1.27825900 |
| C | 0.02747600  | -1.07986400 | -4.06445300 |
| H | 0.84006100  | -0.44303700 | -3.66454200 |
| C | 0.97553600  | -3.65012100 | 0.21974100  |
| H | 0.66105000  | -2.70429200 | 0.70265200  |
| C | -0.52110900 | 2.86168100  | -0.48259300 |
| H | -0.93949400 | 1.92401900  | -0.90456200 |
| C | 1.82325400  | -0.40306600 | 2.58204600  |
| H | 1.76105100  | -0.95364900 | 1.62761700  |
| C | -0.58324200 | 3.60086900  | 4.53083300  |
| H | -0.46861000 | 4.68437000  | 4.36953900  |
| C | -1.29165200 | -0.36434400 | -3.78425400 |
| H | -1.44706100 | -0.24393800 | -2.69728800 |
| H | -2.13994000 | -0.95354600 | -4.17657400 |
| H | -1.32075100 | 0.63120900  | -4.26154400 |
| C | 2.50254000  | -3.71904200 | 0.21933800  |

---

|    |             |             |             |
|----|-------------|-------------|-------------|
| H  | 2.89049900  | -3.69804500 | 1.25327500  |
| H  | 2.97272300  | -2.89582200 | -0.34323500 |
| H  | 2.83776000  | -4.66447300 | -0.24284700 |
| Ni | -1.68218600 | -0.51435900 | 0.03034500  |
| H  | -1.65639000 | 3.41905900  | 4.71642100  |
| H  | -0.04050800 | 3.32871400  | 5.44831000  |
| C  | -1.66039800 | 3.86307200  | -0.51279100 |
| C  | -2.89981000 | 3.44508300  | -0.01102800 |
| C  | -1.54920900 | 5.16012900  | -1.01555800 |
| C  | -3.99787000 | 4.29540800  | -0.00445800 |
| H  | -2.99494900 | 2.42431100  | 0.37538700  |
| C  | -2.64986400 | 6.02010900  | -1.00595900 |
| H  | -0.59818100 | 5.50692200  | -1.43092100 |
| C  | -3.87434700 | 5.59382700  | -0.50141300 |
| H  | -4.95814800 | 3.93302500  | 0.37764900  |
| H  | -2.54504400 | 7.03325600  | -1.40580400 |
| H  | -4.73548700 | 6.26852400  | -0.50205300 |
| C  | 3.30249900  | -0.12635500 | 2.78594800  |
| C  | 3.77531400  | 0.82506800  | 3.69631900  |
| C  | 4.23937800  | -0.83629600 | 2.02728100  |
| C  | 5.14151800  | 1.05783900  | 3.84135700  |
| H  | 3.06773100  | 1.40365500  | 4.29781300  |
| C  | 5.60554900  | -0.60521300 | 2.16636200  |
| H  | 3.88595600  | -1.57383300 | 1.29887700  |
| C  | 6.06243700  | 0.34565800  | 3.07531900  |
| H  | 5.48872300  | 1.80728600  | 4.55901000  |
| H  | 6.31464700  | -1.16577500 | 1.54979700  |
| H  | 7.13426700  | 0.53470600  | 3.18504600  |
| C  | 5.29349400  | -1.45611200 | -3.52082300 |
| C  | 6.07178400  | -0.43935500 | -3.00349200 |

---

|   |             |             |             |
|---|-------------|-------------|-------------|
| C | 5.54362000  | 0.43740500  | -2.01355200 |
| C | 4.22526600  | 0.20775400  | -1.62140000 |
| C | 3.41560600  | -0.84368500 | -2.14772500 |
| C | 3.95319500  | -1.67957300 | -3.10156200 |
| H | 7.25020400  | 1.74763900  | -1.64387800 |
| H | 5.71903800  | -2.11931600 | -4.27949800 |
| H | 7.10084600  | -0.30288600 | -3.35180000 |
| C | 6.21311700  | 1.52085100  | -1.37566900 |
| C | 3.54032500  | 0.99059600  | -0.64612500 |
| H | 3.37187900  | -2.50237100 | -3.53148900 |
| C | 4.21521000  | 2.02262600  | -0.03711600 |
| C | 5.56102900  | 2.27422700  | -0.42023000 |
| H | 3.74242800  | 2.64084600  | 0.73220000  |
| H | 6.09526000  | 3.09508500  | 0.06736900  |
| C | 2.15440000  | -0.68942000 | -1.44006200 |
| C | 2.22119200  | 0.37800900  | -0.58402400 |
| C | -3.46012700 | -2.25574000 | -1.44647000 |
| C | -3.81313700 | -3.55324900 | -1.79285700 |
| C | -3.66074000 | -4.60962500 | -0.89301200 |
| C | -3.11908100 | -4.33260100 | 0.36009300  |
| C | -2.73774800 | -3.03983000 | 0.71310200  |
| C | -2.90951100 | -1.95564100 | -0.17872400 |
| H | -3.62173000 | -1.45856300 | -2.17596300 |
| H | -4.22362400 | -3.73872900 | -2.79137300 |
| H | -2.97457600 | -5.14196600 | 1.08525200  |
| H | -2.27886500 | -2.88786200 | 1.69547000  |
| C | -5.08432200 | 1.42886700  | -2.26270400 |
| C | -4.13213300 | 0.81254600  | -1.46596600 |
| C | -4.45884700 | 0.25610700  | -0.21539200 |
| C | -5.79248500 | 0.36491500  | 0.23683800  |



---

|   |             |             |             |
|---|-------------|-------------|-------------|
| C | -6.73316700 | 1.00775200  | -0.57408300 |
| C | -6.40269300 | 1.53294500  | -1.81795200 |
| H | -4.78851000 | 1.85099800  | -3.22789400 |
| H | -3.08562500 | 0.76919100  | -1.78555700 |
| C | -6.20293800 | -0.16058900 | 1.58443300  |
| H | -7.76360900 | 1.08355800  | -0.20589700 |
| H | -7.16230700 | 2.02489400  | -2.43176700 |
| C | -5.16000000 | -1.08866000 | 2.17505800  |
| C | -3.76103500 | -0.51615600 | 1.97707100  |
| H | -6.37828800 | 0.69488200  | 2.26701400  |
| H | -5.35161500 | -1.26698400 | 3.24731200  |
| N | -3.46678100 | -0.38607100 | 0.54498600  |
| H | -5.19681100 | -2.07214200 | 1.67145700  |
| H | -7.17964400 | -0.66879800 | 1.50300700  |
| H | -0.73568600 | -5.69322600 | -3.64250200 |
| C | 0.26726500  | -1.22251200 | -5.55903700 |
| H | 1.19095600  | -1.78418200 | -5.77636300 |
| H | -0.56896500 | -1.73601900 | -6.06370000 |
| H | 0.35738900  | -0.22803700 | -6.02585200 |
| C | 0.43104400  | -4.78488900 | 1.07301700  |
| H | 0.83269900  | -5.76390300 | 0.75712100  |
| H | 0.73218600  | -4.63427800 | 2.12406400  |
| H | -0.66709200 | -4.83529800 | 1.03675900  |
| C | 1.18580900  | -1.34424300 | 3.58930000  |
| C | 1.87085400  | -1.88994700 | 4.67445300  |
| C | -0.14588100 | -1.72850000 | 3.36681000  |
| C | 1.23729600  | -2.79617700 | 5.52838100  |
| H | 2.91466900  | -1.61235600 | 4.85341200  |
| C | -0.77523000 | -2.62954400 | 4.21730600  |
| H | -0.67952100 | -1.31754400 | 2.49468900  |

---

|   |             |             |             |
|---|-------------|-------------|-------------|
| C | -0.08408900 | -3.16729200 | 5.30522500  |
| H | 1.78868200  | -3.21570500 | 6.37515000  |
| H | -1.81370000 | -2.92355200 | 4.02915200  |
| H | -0.57801300 | -3.87775500 | 5.97428400  |
| C | 0.67249000  | 3.22569100  | -1.33855500 |
| C | 0.88530500  | 2.58185100  | -2.56027800 |
| C | 1.59491800  | 4.19140800  | -0.92258800 |
| C | 1.99772700  | 2.88200300  | -3.34382800 |
| H | 0.17289500  | 1.81403700  | -2.88577500 |
| C | 2.69873200  | 4.50764200  | -1.71142200 |
| H | 1.44544600  | 4.69459200  | 0.04066500  |
| C | 2.90786800  | 3.84867300  | -2.92190000 |
| H | 2.15634200  | 2.34978300  | -4.28755400 |
| H | 3.41208800  | 5.26463700  | -1.37065300 |
| H | 3.78596000  | 4.08216200  | -3.53120000 |
| H | -3.95789500 | -5.62644300 | -1.16395500 |
| C | -3.52828300 | 0.79745500  | 2.70914600  |
| H | -4.14404400 | 1.61832100  | 2.30231100  |
| H | -3.77034100 | 0.69263500  | 3.78105100  |
| H | -2.47108100 | 1.10207800  | 2.61915000  |
| H | -3.03800900 | -1.23724300 | 2.38886000  |

**INT8-L6**

|   |             |             |             |
|---|-------------|-------------|-------------|
| C | -0.05236500 | -0.53558200 | 0.04512000  |
| N | 1.00380100  | 0.36331700  | -0.07290400 |
| N | 0.08685700  | -1.02546800 | 1.33585400  |
| C | 1.31755300  | 0.97721000  | -1.31839800 |
| C | 1.83526200  | 2.09691300  | -3.81845000 |
| C | 0.66004700  | 2.16255700  | -1.68303200 |
| C | 2.23463800  | 0.34432900  | -2.17056000 |
| C | 2.45926800  | 0.91032000  | -3.42679700 |

---

|    |             |             |             |
|----|-------------|-------------|-------------|
| C  | 0.94713100  | 2.71372500  | -2.93037300 |
| H  | 3.13763100  | 0.40488900  | -4.12530000 |
| H  | 0.44195800  | 3.63764000  | -3.23600200 |
| C  | -0.73903200 | -2.02772400 | 1.93360400  |
| C  | -2.14399300 | -3.98944200 | 3.29373400  |
| C  | -1.76789800 | -1.63775800 | 2.81128800  |
| C  | -0.45086100 | -3.38051300 | 1.66808800  |
| C  | -1.17041100 | -4.35154100 | 2.36865100  |
| C  | -2.44873100 | -2.64913000 | 3.49802000  |
| H  | -0.96065600 | -5.41084900 | 2.19150800  |
| H  | -3.24481500 | -2.38067000 | 4.19877700  |
| C  | 0.61562800  | -3.76980600 | 0.66622300  |
| H  | 0.64470100  | -2.95699600 | -0.08326900 |
| C  | -2.14275700 | -0.18208000 | 3.01411500  |
| H  | -1.90782000 | 0.33923400  | 2.06494300  |
| C  | 2.97419100  | -0.89597000 | -1.69971700 |
| H  | 2.34969500  | -1.34956700 | -0.91128500 |
| C  | -0.32367500 | 2.78118900  | -0.70245900 |
| H  | -0.89592900 | 1.92484000  | -0.29534300 |
| C  | 2.12417700  | 2.71238900  | -5.15345600 |
| H  | 2.91619200  | 3.47778300  | -5.07781100 |
| C  | 0.29339200  | -5.05462600 | -0.08436900 |
| H  | -0.73528700 | -5.05083600 | -0.48281700 |
| H  | 0.40205400  | -5.94868100 | 0.55437500  |
| H  | 0.98909200  | -5.18022000 | -0.93192100 |
| C  | -1.33790200 | 0.47455700  | 4.13320700  |
| H  | -1.67106300 | 1.51670100  | 4.28114700  |
| H  | -0.25627900 | 0.49203500  | 3.93162500  |
| H  | -1.49236400 | -0.06249700 | 5.08667200  |
| Ni | -1.23282900 | -1.07191800 | -1.27625700 |

---

|   |             |             |             |
|---|-------------|-------------|-------------|
| H | 2.46802100  | 1.96160000  | -5.88116200 |
| H | 1.23604400  | 3.21303000  | -5.56935700 |
| C | 3.09464000  | -1.97128000 | -2.76329600 |
| C | 2.03784000  | -2.87836700 | -2.90162900 |
| C | 4.20359700  | -2.10333600 | -3.60263200 |
| C | 2.07881800  | -3.88420000 | -3.86288000 |
| H | 1.16486800  | -2.76545900 | -2.24572600 |
| C | 4.24548800  | -3.10813900 | -4.56920100 |
| H | 5.05360000  | -1.42143200 | -3.49004000 |
| C | 3.18496600  | -4.00081000 | -4.70390000 |
| H | 1.24073300  | -4.58395500 | -3.95382700 |
| H | 5.12186600  | -3.19822900 | -5.21804900 |
| H | 3.22314000  | -4.79151200 | -5.45881000 |
| C | 0.39680600  | 3.40974900  | 0.47191600  |
| C | 1.40541600  | 4.35903100  | 0.27534200  |
| C | 0.06445100  | 3.04951400  | 1.78073200  |
| C | 2.06347800  | 4.93417200  | 1.35973100  |
| H | 1.67637500  | 4.64679800  | -0.74774600 |
| C | 0.72968100  | 3.61341300  | 2.86846700  |
| H | -0.71623900 | 2.29562100  | 1.94828900  |
| C | 1.73131100  | 4.55819000  | 2.66078400  |
| H | 2.84960400  | 5.67599700  | 1.18789200  |
| H | 0.46680000  | 3.30426400  | 3.88487400  |
| H | 2.25953800  | 4.99653700  | 3.51253200  |
| C | 2.92979500  | -0.90518000 | 5.36430400  |
| C | 3.92094400  | 0.03277800  | 5.15117300  |
| C | 3.98375900  | 0.74186700  | 3.91814000  |
| C | 3.00543500  | 0.43377900  | 2.97394700  |
| C | 1.96818900  | -0.52220200 | 3.19079000  |
| C | 1.93612200  | -1.19902400 | 4.39123300  |

---

|   |             |             |             |
|---|-------------|-------------|-------------|
| H | 5.72951800  | 2.01385500  | 4.24293400  |
| H | 2.90075400  | -1.44288000 | 6.31661300  |
| H | 4.66509000  | 0.23431700  | 5.92879000  |
| C | 4.93967400  | 1.72927400  | 3.53992100  |
| C | 2.92960300  | 1.03380600  | 1.68181800  |
| H | 1.16219500  | -1.94518400 | 4.60396300  |
| C | 3.86866000  | 1.97869900  | 1.34241200  |
| C | 4.87140800  | 2.31621400  | 2.29359000  |
| H | 3.86030500  | 2.46792800  | 0.36374000  |
| H | 5.61715300  | 3.06755400  | 2.01571500  |
| C | 1.20098500  | -0.48492200 | 1.95420700  |
| C | 1.76825600  | 0.39699400  | 1.07469300  |
| C | -2.97217900 | -0.40821600 | -2.39364400 |
| C | -1.90497000 | -0.62877300 | -3.28503100 |
| C | -1.22496000 | -1.86010800 | -3.28781700 |
| C | -1.61453100 | -2.85687900 | -2.36867400 |
| C | -2.67001200 | -2.63587400 | -1.45646400 |
| C | -3.37198800 | -1.40133000 | -1.46117200 |
| H | -3.51271300 | 0.54237300  | -2.41744800 |
| H | -1.61677600 | 0.15790200  | -3.99051500 |
| H | -1.08293600 | -3.81469100 | -2.34860300 |
| H | -2.92987700 | -3.41506600 | -0.73318800 |
| C | -4.13318100 | 2.31133500  | 0.60780100  |
| C | -3.81286100 | 1.06208200  | 0.09766600  |
| C | -4.79273400 | 0.06532100  | -0.07329300 |
| C | -6.11583600 | 0.34674500  | 0.33304000  |
| C | -6.40859400 | 1.60913800  | 0.85820400  |
| C | -5.44331800 | 2.59998400  | 0.99090800  |
| H | -3.34304600 | 3.06591400  | 0.70627800  |
| H | -2.77766000 | 0.82620000  | -0.17003000 |

---

|   |             |             |             |
|---|-------------|-------------|-------------|
| C | -7.20037600 | -0.69103300 | 0.24021600  |
| H | -7.44346300 | 1.81138000  | 1.15968500  |
| H | -5.70677300 | 3.58400300  | 1.38791400  |
| C | -6.80856100 | -1.84405600 | -0.66247400 |
| C | -5.38682500 | -2.30825000 | -0.36713400 |
| H | -7.43263500 | -1.06898000 | 1.25556700  |
| H | -7.50939300 | -2.68914100 | -0.55198900 |
| N | -4.46004200 | -1.19563900 | -0.59568900 |
| C | -5.22727500 | -2.90986800 | 1.01990800  |
| H | -5.47181700 | -2.18201500 | 1.81135400  |
| H | -5.89095900 | -3.78122400 | 1.14884400  |
| H | -4.18718500 | -3.23268200 | 1.19493500  |
| H | -5.12917800 | -3.07894100 | -1.11283800 |
| H | -6.85060500 | -1.52627600 | -1.71966500 |
| H | -8.13569100 | -0.22207300 | -0.11167600 |
| H | -2.68634900 | -4.76246900 | 3.84652300  |
| C | 1.98962400  | -3.87466700 | 1.32102600  |
| H | 2.76061800  | -4.10756200 | 0.56484200  |
| H | 2.28097000  | -2.94270100 | 1.83366000  |
| H | 2.00083100  | -4.68390800 | 2.07318200  |
| C | -3.62864900 | 0.01209600  | 3.28296000  |
| H | -3.91329700 | -0.34546900 | 4.28814700  |
| H | -3.88443400 | 1.08326300  | 3.23483800  |
| H | -4.25451100 | -0.50458000 | 2.53768100  |
| C | 4.30009800  | -0.56604600 | -1.03475700 |
| C | 4.69514900  | -1.31440800 | 0.07946900  |
| C | 5.15131100  | 0.44437100  | -1.49096400 |
| C | 5.90103800  | -1.06129100 | 0.72502100  |
| H | 4.02920000  | -2.09959300 | 0.45496600  |
| C | 6.36527500  | 0.69582400  | -0.85186600 |

---

|           |             |             |             |
|-----------|-------------|-------------|-------------|
| H         | 4.85618300  | 1.05719800  | -2.34962500 |
| C         | 6.74252900  | -0.05243300 | 0.26020400  |
| H         | 6.17948000  | -1.64895500 | 1.60486100  |
| H         | 7.01792900  | 1.49158300  | -1.22415900 |
| H         | 7.68872800  | 0.15412300  | 0.76891700  |
| C         | -1.37018400 | 3.67585900  | -1.34119200 |
| C         | -2.18078000 | 3.12858900  | -2.34515600 |
| C         | -1.63337100 | 4.97961900  | -0.91639900 |
| C         | -3.22450800 | 3.85444300  | -2.90419500 |
| H         | -1.98312700 | 2.10183100  | -2.67114800 |
| C         | -2.68221300 | 5.71268000  | -1.47681400 |
| H         | -1.02518900 | 5.42888400  | -0.12550600 |
| C         | -3.48218600 | 5.15487000  | -2.46781300 |
| H         | -3.84981500 | 3.39965400  | -3.67883000 |
| H         | -2.87480000 | 6.73096300  | -1.12575400 |
| H         | -4.30717100 | 5.72862900  | -2.89977200 |
| H         | -0.39360100 | -2.03357000 | -3.97699400 |
| <b>3a</b> |             |             |             |
| C         | -1.80090100 | -1.06196900 | -0.81670100 |
| C         | -3.11920200 | -1.48417800 | -0.94117300 |
| C         | -4.14675400 | -0.81953700 | -0.27212600 |
| C         | -3.83343300 | 0.27414500  | 0.53056400  |
| C         | -2.51332600 | 0.69145700  | 0.67524900  |
| C         | -1.47435200 | 0.03164600  | 0.00172100  |
| H         | -1.00592300 | -1.57573800 | -1.36502600 |
| H         | -3.34879500 | -2.33698700 | -1.58732300 |
| H         | -4.62513400 | 0.80539600  | 1.06745000  |
| H         | -2.27852000 | 1.53400700  | 1.33266900  |
| C         | 1.91774500  | -2.52635200 | 0.74413900  |
| C         | 0.83060600  | -1.66707000 | 0.69172500  |

---

|                |             |             |             |
|----------------|-------------|-------------|-------------|
| C              | 0.94961700  | -0.37537200 | 0.14598600  |
| C              | 2.21244800  | 0.05052800  | -0.31945900 |
| C              | 3.29320100  | -0.83317300 | -0.24569200 |
| C              | 3.16430700  | -2.11604100 | 0.27016700  |
| H              | 1.79162800  | -3.52496300 | 1.17307600  |
| H              | -0.13648500 | -1.98927100 | 1.08743200  |
| C              | 2.41905400  | 1.44004300  | -0.85901500 |
| H              | 4.26569600  | -0.48865600 | -0.61732900 |
| H              | 4.02585400  | -2.78794400 | 0.30933900  |
| C              | 1.10820200  | 2.14963400  | -1.13940000 |
| C              | 0.11991100  | 1.92868100  | 0.00123700  |
| H              | 3.01614000  | 2.02578100  | -0.13247100 |
| H              | 1.27001200  | 3.22952200  | -1.29756600 |
| N              | -0.15115200 | 0.49238400  | 0.11349500  |
| C              | 0.58697800  | 2.52287000  | 1.32087500  |
| H              | 1.46997900  | 1.99215300  | 1.71247100  |
| H              | 0.85385400  | 3.58616000  | 1.20168100  |
| H              | -0.19902500 | 2.45066400  | 2.08907400  |
| H              | -0.83437500 | 2.40262900  | -0.28415900 |
| H              | 0.65145000  | 1.75364600  | -2.06405900 |
| H              | 3.04017000  | 1.39683000  | -1.77062900 |
| H              | -5.18307100 | -1.15178700 | -0.37767200 |
| <b>INT1-L2</b> |             |             |             |
| C              | 0.14461200  | 0.17964000  | -0.10184900 |
| N              | 0.75027200  | -1.09678900 | -0.14688100 |
| N              | 1.25982000  | 1.03743800  | 0.03597500  |
| C              | 0.00000800  | -2.30213000 | -0.19647700 |
| C              | -1.35498600 | -4.71518800 | -0.30425000 |
| C              | -0.48053300 | -2.75711700 | -1.43718500 |
| C              | -0.23736000 | -3.00242700 | 0.99938700  |



---

|   |             |             |             |
|---|-------------|-------------|-------------|
| C | -0.91285100 | -4.22341400 | 0.91914800  |
| C | -1.15632900 | -3.97882500 | -1.46855800 |
| H | -1.12030600 | -4.78682500 | 1.83475500  |
| H | -1.54641000 | -4.35612300 | -2.41891300 |
| C | 1.13779000  | 2.44910400  | 0.10578000  |
| C | 0.99108700  | 5.21157300  | 0.25580000  |
| C | 1.38589400  | 3.20792300  | -1.05152900 |
| C | 0.77003300  | 3.04538400  | 1.32662300  |
| C | 0.70642000  | 4.43959800  | 1.37861200  |
| C | 1.31648100  | 4.60059600  | -0.95040700 |
| H | 0.41984700  | 4.93229100  | 2.31282300  |
| H | 1.49985900  | 5.21755200  | -1.83617200 |
| C | 0.44294200  | 2.17936100  | 2.52379300  |
| H | -0.04260500 | 1.27397400  | 2.11088000  |
| C | 1.57252500  | 2.52137200  | -2.38786100 |
| H | 2.02209000  | 1.52817000  | -2.20022100 |
| C | 0.08703200  | -2.37292400 | 2.33703800  |
| H | 0.91224500  | -1.65254800 | 2.18313700  |
| C | -0.27521100 | -1.92037300 | -2.68068300 |
| H | -0.27770700 | -0.86882400 | -2.33823300 |
| C | -0.56377900 | 2.81482400  | 3.46856500  |
| H | -1.47102500 | 3.13690500  | 2.93046900  |
| H | -0.14845300 | 3.68867200  | 4.00351400  |
| H | -0.87417600 | 2.08506200  | 4.23491100  |
| C | 2.49274300  | 3.26835600  | -3.34074800 |
| H | 2.67479300  | 2.66616400  | -4.24623300 |
| H | 3.46997500  | 3.49380200  | -2.88055900 |
| H | 2.04936600  | 4.22208800  | -3.67774100 |
| C | 0.54168700  | -3.37068900 | 3.39128100  |
| H | -0.27334100 | -4.05339500 | 3.68966700  |

---

|    |             |             |             |
|----|-------------|-------------|-------------|
| H  | 0.86266800  | -2.84169200 | 4.30416400  |
| H  | 1.38755600  | -3.98629200 | 3.04004700  |
| C  | -1.41329600 | -2.05204800 | -3.68017100 |
| H  | -1.43879400 | -3.04695500 | -4.16117300 |
| H  | -1.29687400 | -1.30746300 | -4.48572700 |
| H  | -2.38872100 | -1.87538100 | -3.19634000 |
| Ni | -1.56647500 | 0.55211000  | -0.13126800 |
| C  | 6.17360900  | 1.18876500  | 0.38065700  |
| C  | 6.64367300  | -0.10759200 | 0.34410200  |
| C  | 5.72550600  | -1.19444400 | 0.21922700  |
| C  | 4.37896100  | -0.86101600 | 0.13791600  |
| C  | 3.87785100  | 0.47943100  | 0.17451100  |
| C  | 4.78751500  | 1.50824200  | 0.29819400  |
| H  | 7.08376400  | -2.90850800 | 0.23168900  |
| H  | 6.88950900  | 2.01139500  | 0.47803700  |
| H  | 7.71804500  | -0.31031800 | 0.41126800  |
| C  | 6.03846600  | -2.58637700 | 0.17087400  |
| C  | 3.32241200  | -1.81586400 | 0.01023700  |
| H  | 4.46204200  | 2.55326900  | 0.33610500  |
| C  | 3.65317900  | -3.15238500 | -0.03389100 |
| C  | 5.02794400  | -3.51748700 | 0.04909500  |
| H  | 2.88336300  | -3.92516400 | -0.13194400 |
| H  | 5.28536400  | -4.58093200 | 0.01389200  |
| C  | 2.43849800  | 0.32368500  | 0.06671800  |
| C  | 2.11659900  | -1.00526400 | -0.03966700 |
| H  | 0.93846500  | 6.30339000  | 0.31725300  |
| C  | -1.13099200 | -1.57456700 | 2.80394900  |
| H  | -1.98976800 | -2.24539700 | 2.98691700  |
| H  | -0.91094000 | -1.02820900 | 3.73883200  |
| H  | -1.43595000 | -0.84198600 | 2.02996200  |

---

|   |             |             |             |
|---|-------------|-------------|-------------|
| C | 1.07248500  | -2.22123500 | -3.32828300 |
| H | 1.11639700  | -3.27192400 | -3.67070400 |
| H | 1.24162200  | -1.57341700 | -4.20614300 |
| H | 1.91048900  | -2.06321200 | -2.62826700 |
| C | 1.70806600  | 1.76792500  | 3.27021900  |
| H | 2.42551500  | 1.24517300  | 2.61572700  |
| H | 2.22095200  | 2.65368500  | 3.68921000  |
| H | 1.46564700  | 1.09114200  | 4.10815700  |
| C | 0.19536700  | 2.28502000  | -3.00915800 |
| H | -0.29215400 | 3.25057700  | -3.23787200 |
| H | 0.27615200  | 1.70960800  | -3.94863800 |
| H | -0.46067800 | 1.73058300  | -2.30979100 |
| H | -1.88629100 | -5.67139500 | -0.34785000 |
| C | -4.77151900 | -2.54007900 | 0.05732300  |
| C | -3.89227800 | -1.47551800 | -0.02986000 |
| C | -4.32502600 | -0.12122100 | 0.06049200  |
| C | -5.72840700 | 0.08272700  | 0.23519900  |
| C | -6.59226600 | -1.00888000 | 0.30958400  |
| C | -6.14547900 | -2.32745300 | 0.23131200  |
| H | -4.37305400 | -3.56004100 | -0.01483200 |
| H | -2.81453100 | -1.63856200 | -0.16301400 |
| C | -6.25194600 | 1.49143600  | 0.30450400  |
| H | -7.66604400 | -0.80541700 | 0.43087700  |
| H | -6.84701100 | -3.16548200 | 0.29548300  |
| C | -5.30111800 | 2.43887900  | -0.40194600 |
| C | -3.88567800 | 2.24566200  | 0.12953100  |
| H | -7.26935100 | 1.54188400  | -0.12751800 |
| H | -5.29271600 | 2.22580200  | -1.48976700 |
| N | -3.41347500 | 0.88495900  | -0.03641500 |
| C | -2.91845100 | 3.21167500  | -0.53014000 |

---

|                |             |             |             |
|----------------|-------------|-------------|-------------|
| H              | -2.92201400 | 3.05479300  | -1.62428400 |
| H              | -3.18113600 | 4.26503900  | -0.32092300 |
| H              | -1.88848900 | 3.01178900  | -0.18191600 |
| H              | -3.92172000 | 2.50308800  | 1.21999700  |
| H              | -5.61343500 | 3.49290400  | -0.27844900 |
| H              | -6.35830900 | 1.81838200  | 1.36016300  |
| <b>INT2-L2</b> |             |             |             |
| C              | -0.34244900 | 0.22868100  | 0.10846400  |
| N              | 0.12833300  | -1.07114800 | 0.08243300  |
| N              | 0.81000700  | 0.99608100  | 0.09064300  |
| C              | -0.72405000 | -2.21526400 | 0.03831100  |
| C              | -2.36495700 | -4.43259900 | -0.05168800 |
| C              | -1.27608600 | -2.59435100 | -1.19843300 |
| C              | -0.97036200 | -2.91737200 | 1.22921900  |
| C              | -1.80960900 | -4.03311600 | 1.15884600  |
| C              | -2.09782300 | -3.72297500 | -1.21772000 |
| H              | -2.03394100 | -4.59918500 | 2.06823600  |
| H              | -2.54976800 | -4.04568600 | -2.16027200 |
| C              | 0.78337200  | 2.41902600  | 0.00314900  |
| C              | 0.67049300  | 5.17166400  | -0.18724900 |
| C              | 0.89857600  | 3.01077100  | -1.26511000 |
| C              | 0.61102300  | 3.16873800  | 1.17997500  |
| C              | 0.56158800  | 4.55901300  | 1.05839100  |
| C              | 0.83650300  | 4.40623800  | -1.33556100 |
| H              | 0.42950000  | 5.17700700  | 1.95147300  |
| H              | 0.91189100  | 4.90154900  | -2.30888900 |
| C              | 0.50996500  | 2.47750200  | 2.52331200  |
| H              | -0.01873800 | 1.52246700  | 2.34669800  |
| C              | 1.00191900  | 2.17242700  | -2.52365900 |
| H              | 1.35323400  | 1.16457800  | -2.23448400 |

---

|    |             |             |             |
|----|-------------|-------------|-------------|
| C  | -0.39718100 | -2.44473500 | 2.55002100  |
| H  | 0.52110500  | -1.86848700 | 2.33053500  |
| C  | -0.96127200 | -1.81757300 | -2.46012200 |
| H  | -0.83479200 | -0.76193600 | -2.15760700 |
| C  | -0.29993400 | 3.25601300  | 3.54843500  |
| H  | -1.28443700 | 3.55665400  | 3.15294800  |
| H  | 0.22238000  | 4.16851900  | 3.88557300  |
| H  | -0.47102200 | 2.63748300  | 4.44488800  |
| C  | 2.00058300  | 2.72628000  | -3.53019400 |
| H  | 2.12228900  | 2.02565700  | -4.37221800 |
| H  | 2.99284300  | 2.88626800  | -3.07728000 |
| H  | 1.66586500  | 3.68618200  | -3.95972800 |
| C  | -0.00275500 | -3.58606500 | 3.47611600  |
| H  | -0.88289200 | -4.13956500 | 3.84621500  |
| H  | 0.52269500  | -3.19507200 | 4.36241000  |
| H  | 0.66472600  | -4.30783400 | 2.97698800  |
| C  | -2.08150800 | -1.85156400 | -3.48843900 |
| H  | -2.18489600 | -2.84663000 | -3.95627200 |
| H  | -1.86919700 | -1.13837500 | -4.30244200 |
| H  | -3.05198200 | -1.58465200 | -3.04015800 |
| Ni | -2.09522100 | 0.83982000  | 0.17701300  |
| C  | 5.73618100  | 0.78014300  | -0.10398300 |
| C  | 6.09522400  | -0.55219400 | -0.11848500 |
| C  | 5.09331800  | -1.56453400 | -0.07681500 |
| C  | 3.77200500  | -1.12701500 | -0.02392200 |
| C  | 3.38970900  | 0.24900300  | -0.00579000 |
| C  | 4.37943100  | 1.20585200  | -0.04615800 |
| H  | 6.31215600  | -3.37583800 | -0.12622100 |
| H  | 6.51935900  | 1.54318700  | -0.13618300 |
| H  | 7.15111900  | -0.83824900 | -0.16228700 |

---

|    |             |             |             |
|----|-------------|-------------|-------------|
| C  | 5.29404900  | -2.97520400 | -0.08587200 |
| C  | 2.64584300  | -2.00362900 | 0.01578800  |
| H  | 4.14150800  | 2.27467000  | -0.02976000 |
| C  | 2.86883900  | -3.36252900 | 0.00423400  |
| C  | 4.21173100  | -3.83065000 | -0.04577100 |
| H  | 2.03902400  | -4.07683000 | 0.02775400  |
| H  | 4.38588000  | -4.91056100 | -0.05479200 |
| C  | 1.93622700  | 0.20125100  | 0.05605100  |
| C  | 1.50650500  | -1.09872600 | 0.05331700  |
| C  | -3.91766500 | 0.41379900  | 1.18630500  |
| C  | -3.39961500 | 1.64276800  | 1.65596400  |
| C  | -3.07087800 | 2.67644300  | 0.75216500  |
| C  | -3.21243100 | 2.46366000  | -0.63379900 |
| C  | -3.71512700 | 1.23422300  | -1.12369600 |
| C  | -4.07194900 | 0.22607500  | -0.20170000 |
| H  | -4.18985300 | -0.39107000 | 1.87488500  |
| H  | -3.25685700 | 1.78748800  | 2.73197800  |
| H  | -2.91899900 | 3.24738100  | -1.33964000 |
| H  | -3.83696800 | 1.06036300  | -2.19706800 |
| Cl | -4.74438600 | -1.28281700 | -0.77822400 |
| H  | -2.66533200 | 3.62420600  | 1.11988100  |
| H  | 0.62427200  | 6.26224700  | -0.26226900 |
| C  | -1.37388500 | -1.49145400 | 3.23572500  |
| H  | -2.31436200 | -2.01681100 | 3.48321200  |
| H  | -0.94779700 | -1.09771700 | 4.17479200  |
| H  | -1.62299100 | -0.64117300 | 2.57731900  |
| C  | 0.34838000  | -2.29706900 | -3.08213100 |
| H  | 0.26574500  | -3.35520500 | -3.38906100 |
| H  | 0.59430400  | -1.70530100 | -3.98064400 |
| H  | 1.19941100  | -2.21797100 | -2.38595000 |

---

|   |             |             |             |
|---|-------------|-------------|-------------|
| C | 1.89958400  | 2.16137300  | 3.07175400  |
| H | 2.48629900  | 1.53083900  | 2.38411200  |
| H | 2.46921600  | 3.09273500  | 3.24070400  |
| H | 1.82965300  | 1.62994600  | 4.03582100  |
| C | -0.38047100 | 1.99917900  | -3.14983800 |
| H | -0.78655900 | 2.97362200  | -3.47719500 |
| H | -0.33323400 | 1.33833700  | -4.03299600 |
| H | -1.08508700 | 1.56137400  | -2.42102400 |
| H | -3.01864700 | -5.30923700 | -0.08650100 |

**TS3-L2**

|   |             |             |             |
|---|-------------|-------------|-------------|
| C | -0.19262700 | 0.17717300  | 0.15008200  |
| N | 0.32106900  | -1.09244000 | 0.02527800  |
| N | 0.89592800  | 1.00580800  | 0.07381300  |
| C | -0.48089700 | -2.27865400 | 0.04736700  |
| C | -1.99060600 | -4.59084400 | 0.11446900  |
| C | -1.28581300 | -2.58830400 | -1.06599500 |
| C | -0.44209600 | -3.07805500 | 1.20234700  |
| C | -1.20757300 | -4.24737400 | 1.20967400  |
| C | -2.03763600 | -3.76490400 | -1.00316700 |
| H | -1.20080300 | -4.89391200 | 2.09171900  |
| H | -2.67873100 | -4.04076100 | -1.84402700 |
| C | 0.78118100  | 2.42833100  | 0.13966200  |
| C | 0.50179600  | 5.16973000  | 0.26186100  |
| C | 0.61379800  | 3.14041300  | -1.05908900 |
| C | 0.80495000  | 3.04825600  | 1.39771000  |
| C | 0.66060500  | 4.43755700  | 1.43255200  |
| C | 0.47427000  | 4.52707000  | -0.97128700 |
| H | 0.65897200  | 4.95487200  | 2.39729700  |
| H | 0.32837100  | 5.11375100  | -1.88370200 |
| C | 0.87327700  | 2.24546300  | 2.67936400  |

---

|    |             |             |             |
|----|-------------|-------------|-------------|
| H  | 1.20877600  | 1.22282200  | 2.42201700  |
| C  | 0.48251100  | 2.42513600  | -2.38679100 |
| H  | 0.93893300  | 1.42327800  | -2.27777000 |
| C  | 0.30372900  | -2.62190000 | 2.43940100  |
| H  | 1.20612300  | -2.07073700 | 2.11544500  |
| C  | -1.34491500 | -1.67084000 | -2.27210700 |
| H  | -1.43948000 | -0.64493100 | -1.86110000 |
| C  | -0.52650200 | 2.12891200  | 3.27959900  |
| H  | -1.21298300 | 1.63334600  | 2.57059100  |
| H  | -0.94609500 | 3.12690300  | 3.49685800  |
| H  | -0.50800400 | 1.55425100  | 4.22108100  |
| C  | 1.20873800  | 3.12996600  | -3.52311200 |
| H  | 1.20196200  | 2.50163800  | -4.42870400 |
| H  | 2.25952100  | 3.34300000  | -3.26561200 |
| H  | 0.72523800  | 4.08420500  | -3.79392900 |
| Ni | -2.00087600 | 0.67955200  | 0.18786200  |
| C  | 5.78384200  | 1.08200400  | -0.55503000 |
| C  | 6.20807800  | -0.22530800 | -0.68259400 |
| C  | 5.26883200  | -1.29428300 | -0.61364400 |
| C  | 3.93707700  | -0.93589500 | -0.41243700 |
| C  | 3.48992900  | 0.41299200  | -0.27563900 |
| C  | 4.41870400  | 1.42653000  | -0.35002800 |
| H  | 6.56644400  | -3.02757000 | -0.89316700 |
| H  | 6.52056300  | 1.88844900  | -0.61266300 |
| H  | 7.26858800  | -0.44737300 | -0.83946400 |
| C  | 5.53793700  | -2.68784800 | -0.73380600 |
| C  | 2.86681600  | -1.87671800 | -0.32740000 |
| H  | 4.12772900  | 2.47755800  | -0.25542600 |
| C  | 3.15537700  | -3.21770300 | -0.44925100 |
| C  | 4.50894100  | -3.60464800 | -0.65293900 |



---

|    |             |             |             |
|----|-------------|-------------|-------------|
| H  | 2.36947700  | -3.97815700 | -0.39484400 |
| H  | 4.73637000  | -4.67015700 | -0.74999400 |
| C  | 2.05333300  | 0.27934700  | -0.09024700 |
| C  | 1.69170500  | -1.04312800 | -0.12276500 |
| C  | -4.61944900 | 0.69748100  | -1.08108400 |
| C  | -5.40608500 | -0.43301800 | -1.24489700 |
| C  | -5.40723900 | -1.46142900 | -0.28609900 |
| C  | -4.63953600 | -1.34424700 | 0.86514600  |
| C  | -3.85188200 | -0.20216400 | 1.07716000  |
| C  | -3.80755300 | 0.77861200  | 0.06262200  |
| H  | -4.58939400 | 1.49439600  | -1.83098300 |
| H  | -6.02145000 | -0.53151800 | -2.14536000 |
| H  | -4.66189700 | -2.13323300 | 1.62476300  |
| H  | -3.35707300 | -0.03898000 | 2.04134200  |
| Cl | -3.13938700 | 2.64798900  | 0.53163900  |
| H  | 0.38596200  | 6.25637500  | 0.31155500  |
| C  | 1.87017200  | 2.81247200  | 3.68030400  |
| H  | 2.87972900  | 2.89780100  | 3.24536900  |
| H  | 1.57169200  | 3.81214700  | 4.03941000  |
| H  | 1.93624800  | 2.16125900  | 4.56715800  |
| C  | -0.99592300 | 2.21644000  | -2.71181800 |
| H  | -1.52043900 | 3.18462500  | -2.79926100 |
| H  | -1.12078100 | 1.66738300  | -3.66145800 |
| H  | -1.49737000 | 1.64686800  | -1.90672500 |
| H  | -6.03301700 | -2.34537700 | -0.43938100 |
| H  | -2.58420600 | -5.50959700 | 0.13602400  |
| C  | -0.06620300 | -1.75964300 | -3.10204700 |
| H  | 0.83857100  | -1.50186100 | -2.52828100 |
| H  | 0.06756800  | -2.78534400 | -3.49009300 |
| H  | -0.11532500 | -1.07870900 | -3.96871200 |

---

|   |             |             |             |
|---|-------------|-------------|-------------|
| C | -2.56195600 | -1.89728400 | -3.15310200 |
| H | -2.62060800 | -1.10729800 | -3.91996000 |
| H | -2.51225500 | -2.86220100 | -3.68860900 |
| H | -3.49924200 | -1.86706200 | -2.57300200 |
| C | 0.77003500  | -3.76005100 | 3.33331400  |
| H | 1.35184000  | -4.51284800 | 2.77621100  |
| H | 1.40812200  | -3.37040100 | 4.14248500  |
| H | -0.07651800 | -4.27638600 | 3.81768100  |
| C | -0.57701700 | -1.64465100 | 3.21780400  |
| H | -1.49950800 | -2.15037200 | 3.55634500  |
| H | -0.05211100 | -1.26070100 | 4.10897100  |
| H | -0.87914500 | -0.78623500 | 2.59387900  |

**INT4-L2**

|   |             |             |             |
|---|-------------|-------------|-------------|
| C | -0.17364900 | 0.22602600  | 0.28875500  |
| N | 0.13716500  | -1.10218400 | 0.14947100  |
| N | 1.00940900  | 0.88384000  | 0.13593300  |
| C | -0.84127100 | -2.14620100 | 0.17472600  |
| C | -2.68536600 | -4.19365500 | 0.21712200  |
| C | -1.65722900 | -2.33538600 | -0.95632500 |
| C | -0.94876900 | -2.92762100 | 1.33834600  |
| C | -1.88751300 | -3.96233700 | 1.33350700  |
| C | -2.57807900 | -3.38521000 | -0.90878800 |
| H | -2.00388700 | -4.59326300 | 2.21920400  |
| H | -3.23568200 | -3.56379700 | -1.76375700 |
| C | 1.18396000  | 2.30452600  | 0.10950700  |
| C | 1.54437100  | 5.02933800  | 0.02680400  |
| C | 1.06779600  | 2.95283500  | -1.12907600 |
| C | 1.47791600  | 2.97046600  | 1.30551900  |
| C | 1.66078600  | 4.35370400  | 1.23587000  |
| C | 1.24944300  | 4.33660700  | -1.14305900 |

---

|    |             |             |             |
|----|-------------|-------------|-------------|
| H  | 1.88253000  | 4.91447700  | 2.14989600  |
| H  | 1.14904600  | 4.88463600  | -2.08541400 |
| C  | 1.56175700  | 2.24757800  | 2.63304800  |
| H  | 1.34801900  | 1.17736700  | 2.45272600  |
| C  | 0.69460600  | 2.20367500  | -2.39253900 |
| H  | 0.85096200  | 1.12354500  | -2.20898100 |
| C  | -0.15028700 | -2.58168100 | 2.57793600  |
| H  | 0.82184200  | -2.16780300 | 2.25101100  |
| C  | -1.53948200 | -1.44215600 | -2.17676200 |
| H  | -1.30717300 | -0.42298000 | -1.80986600 |
| C  | 0.50044600  | 2.75568600  | 3.60348700  |
| H  | -0.50239600 | 2.70803600  | 3.14874300  |
| H  | 0.68934900  | 3.80455800  | 3.89152000  |
| H  | 0.50283600  | 2.15565900  | 4.52904600  |
| C  | 1.57305600  | 2.58415700  | -3.57703900 |
| H  | 1.34403800  | 1.94530200  | -4.44602200 |
| H  | 2.64434700  | 2.46775300  | -3.34257500 |
| H  | 1.40770400  | 3.62814700  | -3.89355800 |
| Ni | -2.04202700 | 0.83635200  | 0.35642000  |
| C  | 5.79526800  | 0.25765300  | -0.82556400 |
| C  | 6.02223700  | -1.09839900 | -0.94983200 |
| C  | 4.95065000  | -2.02354300 | -0.79288000 |
| C  | 3.69885400  | -1.47855800 | -0.50939500 |
| C  | 3.45781300  | -0.07877800 | -0.37192800 |
| C  | 4.51013100  | 0.79393700  | -0.53565700 |
| H  | 5.97066700  | -3.92477100 | -1.12187500 |
| H  | 6.63114300  | 0.95115900  | -0.95409000 |
| H  | 7.02740600  | -1.46970500 | -1.17398500 |
| C  | 5.01309200  | -3.44187900 | -0.90191300 |
| C  | 2.51581400  | -2.25919500 | -0.33827000 |

---

|    |             |             |             |
|----|-------------|-------------|-------------|
| H  | 4.37189400  | 1.87658700  | -0.44806500 |
| C  | 2.60473900  | -3.62859000 | -0.45326000 |
| C  | 3.87403400  | -4.20434100 | -0.73550700 |
| H  | 1.72583200  | -4.27102300 | -0.33616700 |
| H  | 3.94356900  | -5.29209500 | -0.82585500 |
| C  | 2.03253300  | -0.00713500 | -0.08838300 |
| C  | 1.48603300  | -1.26335700 | -0.08059200 |
| C  | -4.76977300 | 1.63019900  | -0.59842700 |
| C  | -5.99888300 | 1.07162900  | -0.94536300 |
| C  | -6.31232400 | -0.24065300 | -0.57720300 |
| C  | -5.39755500 | -1.00291100 | 0.14619600  |
| C  | -4.16575000 | -0.44153200 | 0.49877900  |
| C  | -3.84242200 | 0.85771900  | 0.09896600  |
| H  | -4.51720000 | 2.65870400  | -0.87813600 |
| H  | -6.72580100 | 1.66275800  | -1.51237700 |
| H  | -5.64803500 | -2.02364400 | 0.45513500  |
| H  | -3.44962800 | -1.04389600 | 1.08756700  |
| Cl | -1.96541100 | 2.92774900  | 0.80635200  |
| H  | 1.67944400  | 6.11446300  | -0.00441600 |
| C  | 2.96203200  | 2.33984200  | 3.22953500  |
| H  | 3.72574800  | 1.93453000  | 2.54474800  |
| H  | 3.23556200  | 3.38560900  | 3.45310200  |
| H  | 3.02191900  | 1.77587400  | 4.17518700  |
| C  | -0.78735800 | 2.39178500  | -2.71183100 |
| H  | -1.02397400 | 3.45717700  | -2.87871800 |
| H  | -1.06402700 | 1.83466500  | -3.62406000 |
| H  | -1.42388400 | 2.04860900  | -1.87786100 |
| H  | -7.28372200 | -0.66586500 | -0.84765900 |
| H  | -3.41389400 | -5.00965100 | 0.23122200  |
| C  | -0.38902500 | -1.89452600 | -3.07312700 |

---

|   |             |             |             |
|---|-------------|-------------|-------------|
| H | 0.57550800  | -1.92693200 | -2.53946500 |
| H | -0.58618500 | -2.90674300 | -3.46862700 |
| H | -0.27383200 | -1.21337100 | -3.93322000 |
| C | -2.83200200 | -1.32507900 | -2.97029100 |
| H | -2.72667200 | -0.54445600 | -3.74116300 |
| H | -3.08113000 | -2.26316600 | -3.49650000 |
| H | -3.68526500 | -1.04978300 | -2.32776700 |
| C | 0.14626400  | -3.77876500 | 3.46745300  |
| H | 0.61728500  | -4.60324800 | 2.90712700  |
| H | 0.83056000  | -3.48780600 | 4.28010900  |
| H | -0.76679900 | -4.17145100 | 3.94676900  |
| C | -0.87726700 | -1.48751600 | 3.36166900  |
| H | -1.85679600 | -1.85646000 | 3.71462900  |
| H | -0.29326300 | -1.17957300 | 4.24480600  |
| H | -1.06300000 | -0.58946000 | 2.74678000  |

**INT5-L2**

|   |             |             |             |
|---|-------------|-------------|-------------|
| C | -0.37178400 | 0.00588500  | -0.07233600 |
| N | -1.22011700 | 1.05842500  | -0.31680600 |
| N | -1.20258800 | -1.09454800 | 0.02418100  |
| C | -0.88284300 | 2.44762600  | -0.24297400 |
| C | -0.37827100 | 5.15697000  | -0.08610100 |
| C | -0.50253900 | 3.12575500  | -1.41039800 |
| C | -1.01186700 | 3.08551800  | 1.00620000  |
| C | -0.75773100 | 4.45758800  | 1.05507600  |
| C | -0.24897400 | 4.49742700  | -1.30271300 |
| H | -0.84025900 | 4.98405300  | 2.01150400  |
| H | 0.05523500  | 5.05507900  | -2.19468200 |
| C | -0.81571000 | -2.43857600 | 0.34052200  |
| C | -0.29233600 | -5.07052600 | 1.03259000  |
| C | -0.83663300 | -3.42102600 | -0.66734600 |

---

|    |             |             |             |
|----|-------------|-------------|-------------|
| C  | -0.52800300 | -2.74561000 | 1.68851500  |
| C  | -0.25955900 | -4.07807400 | 2.00706600  |
| C  | -0.57650600 | -4.74232200 | -0.28418000 |
| H  | -0.02438300 | -4.34949800 | 3.03951900  |
| H  | -0.58283800 | -5.52660200 | -1.04791300 |
| C  | -0.55159000 | -1.67911100 | 2.76686500  |
| H  | -0.07356300 | -0.77637900 | 2.34054400  |
| C  | -1.11817100 | -3.12101100 | -2.12695400 |
| H  | -1.06116700 | -2.02670100 | -2.26042000 |
| C  | -1.42914100 | 2.33981300  | 2.26051200  |
| H  | -1.25293200 | 1.26410600  | 2.08024600  |
| C  | -0.41650400 | 2.42591700  | -2.74835400 |
| H  | -0.40925300 | 1.33634000  | -2.57013400 |
| C  | 0.24043400  | -2.05430600 | 4.01071100  |
| H  | 1.25319800  | -2.41462700 | 3.76531400  |
| H  | -0.26711600 | -2.83769200 | 4.60253200  |
| H  | 0.35233600  | -1.17006600 | 4.66019700  |
| C  | -2.49731000 | -3.61687200 | -2.55263300 |
| H  | -2.66108300 | -3.41110100 | -3.62389900 |
| H  | -3.31484500 | -3.13436600 | -1.99486500 |
| H  | -2.59072600 | -4.70916200 | -2.40897900 |
| Ni | 1.50175700  | -0.12066100 | -0.16332100 |
| C  | -5.94505500 | -2.43394900 | 0.16710400  |
| C  | -6.70653600 | -1.32127100 | -0.12680400 |
| C  | -6.07327100 | -0.07733900 | -0.41331800 |
| C  | -4.68018000 | -0.07186500 | -0.39087100 |
| C  | -3.88220500 | -1.22401900 | -0.11503900 |
| C  | -4.52227000 | -2.40663300 | 0.18213900  |
| H  | -7.80087200 | 1.22236500  | -0.72460000 |
| H  | -6.44803400 | -3.37792000 | 0.39808100  |

---

|   |             |             |             |
|---|-------------|-------------|-------------|
| H | -7.79991500 | -1.38454100 | -0.12856800 |
| C | -6.70754100 | 1.16853400  | -0.69015900 |
| C | -3.88571600 | 1.09689700  | -0.59642800 |
| H | -3.95804000 | -3.31396500 | 0.42439500  |
| C | -4.52543200 | 2.28937000  | -0.85106700 |
| C | -5.94760100 | 2.30094000  | -0.90139900 |
| H | -3.96200700 | 3.21750600  | -0.99657200 |
| H | -6.45190700 | 3.25014100  | -1.10649100 |
| C | -2.51428600 | -0.72719100 | -0.19312700 |
| C | -2.52134500 | 0.61898100  | -0.42932600 |
| C | 2.18872500  | 2.24944100  | 1.16055400  |
| C | 2.74240600  | 3.07861800  | 2.13719500  |
| C | 3.08864700  | 2.56601500  | 3.38699800  |
| C | 2.87767600  | 1.20987500  | 3.63403500  |
| C | 2.33889100  | 0.38784300  | 2.64182400  |
| C | 1.97901000  | 0.87419500  | 1.37514000  |
| H | 1.93449500  | 2.69617500  | 0.18980800  |
| H | 2.90141000  | 4.14075400  | 1.91485400  |
| H | 3.14969300  | 0.77959900  | 4.60578900  |
| H | 2.23380400  | -0.68103300 | 2.86287900  |
| C | 5.23400700  | 1.81190100  | -2.05803300 |
| C | 4.18667000  | 1.15132900  | -1.44112400 |
| C | 4.36506900  | -0.09030600 | -0.76853800 |
| C | 5.69565300  | -0.62032000 | -0.75813300 |
| C | 6.72997000  | 0.07398900  | -1.37900600 |
| C | 6.53147100  | 1.28658500  | -2.04057800 |
| H | 5.03390300  | 2.76329300  | -2.56665000 |
| H | 3.17354900  | 1.56382500  | -1.46512400 |
| C | 5.94231200  | -1.92511500 | -0.05440200 |
| H | 7.73778000  | -0.36365200 | -1.33593400 |

---

|    |             |             |             |
|----|-------------|-------------|-------------|
| H  | 7.36337000  | 1.80928500  | -2.52327000 |
| C  | 4.90837300  | -2.13312600 | 1.03820900  |
| C  | 3.49709600  | -1.97610300 | 0.47395400  |
| H  | 5.89227400  | -2.77521400 | -0.76705200 |
| H  | 5.01798900  | -3.12495400 | 1.51524900  |
| N  | 3.31893200  | -0.70013100 | -0.17765500 |
| C  | 3.09761400  | -3.13297400 | -0.44008500 |
| H  | 3.67575200  | -3.11359500 | -1.38056300 |
| H  | 3.24340800  | -4.11327200 | 0.05212300  |
| H  | 2.03606500  | -3.03396600 | -0.72126400 |
| H  | 2.79772500  | -2.01154600 | 1.34083000  |
| H  | 5.04990200  | -1.36871600 | 1.82592600  |
| H  | 6.96775900  | -1.94749500 | 0.35976200  |
| Cl | 1.18186100  | -0.68745900 | -2.37625700 |
| H  | -0.08334000 | -6.10962800 | 1.30553800  |
| C  | -1.98377800 | -1.32674200 | 3.16879200  |
| H  | -2.57796000 | -0.91534100 | 2.33716100  |
| H  | -2.51119000 | -2.22269500 | 3.54496700  |
| H  | -1.98294200 | -0.57502500 | 3.97725500  |
| C  | -0.04888500 | -3.71475700 | -3.03886800 |
| H  | -0.20231800 | -3.35445800 | -4.06978400 |
| H  | 0.95692500  | -3.38898000 | -2.73422100 |
| H  | -0.09066900 | -4.81889500 | -3.06367600 |
| H  | 3.52230300  | 3.21379900  | 4.15646900  |
| C  | -2.91555500 | 2.53408600  | 2.55475800  |
| H  | -3.56457400 | 2.16489300  | 1.74498300  |
| H  | -3.19818800 | 2.00285400  | 3.47993300  |
| H  | -3.14295100 | 3.60534600  | 2.70372500  |
| C  | -0.60624400 | 2.72541500  | 3.48320300  |
| H  | -0.86638600 | 3.73620700  | 3.84624700  |



---

|                |             |             |             |
|----------------|-------------|-------------|-------------|
| H              | -0.81300300 | 2.02587200  | 4.31168200  |
| H              | 0.47436600  | 2.69926600  | 3.27951200  |
| C              | -1.63624500 | 2.76560300  | -3.60048100 |
| H              | -2.57833600 | 2.48137100  | -3.10001300 |
| H              | -1.68608300 | 3.84861900  | -3.81840400 |
| H              | -1.59609500 | 2.23112300  | -4.56436600 |
| C              | 0.87935000  | 2.72950300  | -3.48591200 |
| H              | 0.94470400  | 2.10902800  | -4.39433700 |
| H              | 0.95398500  | 3.78865500  | -3.79300700 |
| H              | 1.75617800  | 2.47521300  | -2.86892300 |
| H              | -0.17412400 | 6.23056600  | -0.02365200 |
| <b>INT6-L2</b> |             |             |             |
| C              | 0.40013700  | 0.03271500  | 0.23775000  |
| N              | 1.27154100  | -1.00313200 | 0.04201400  |
| N              | 1.17005600  | 1.16883000  | 0.16949100  |
| C              | 0.92189300  | -2.38283300 | -0.13454100 |
| C              | 0.43524900  | -5.06417800 | -0.54509400 |
| C              | 0.62439000  | -2.81835300 | -1.43616100 |
| C              | 0.94521800  | -3.24285800 | 0.97682900  |
| C              | 0.70056700  | -4.59694700 | 0.73836000  |
| C              | 0.38667100  | -4.18364300 | -1.61847700 |
| H              | 0.70269700  | -5.30080400 | 1.57482200  |
| H              | 0.15543200  | -4.56105700 | -2.61962600 |
| C              | 0.65813700  | 2.50442100  | 0.27063500  |
| C              | -0.17396700 | 5.12875800  | 0.43511600  |
| C              | 0.00464200  | 3.07031400  | -0.83923300 |
| C              | 0.86728600  | 3.20249800  | 1.47271700  |
| C              | 0.44224800  | 4.53172900  | 1.52991600  |
| C              | -0.40159500 | 4.40313800  | -0.72843800 |
| H              | 0.58910300  | 5.10866800  | 2.44723000  |

---

|    |             |             |             |
|----|-------------|-------------|-------------|
| H  | -0.91359000 | 4.88074900  | -1.56800300 |
| C  | 1.43615300  | 2.49732400  | 2.68554700  |
| H  | 2.16921300  | 1.74775000  | 2.33277600  |
| C  | -0.23855900 | 2.27739900  | -2.10861300 |
| H  | -0.43052600 | 1.23014400  | -1.79970200 |
| C  | 1.21916900  | -2.72184900 | 2.37347900  |
| H  | 0.76032300  | -1.71542600 | 2.43005400  |
| C  | 0.57259700  | -1.86804500 | -2.61639400 |
| H  | 0.48536200  | -0.83933700 | -2.21924700 |
| C  | 0.31028000  | 1.74186200  | 3.39168500  |
| H  | -0.20426900 | 1.04991000  | 2.70321400  |
| H  | -0.44506100 | 2.45190100  | 3.77369200  |
| H  | 0.69430600  | 1.15852000  | 4.24551000  |
| C  | 0.99472000  | 2.28421700  | -3.00792000 |
| H  | 0.81481100  | 1.68668100  | -3.91773000 |
| H  | 1.88775200  | 1.87375200  | -2.50659000 |
| H  | 1.23373500  | 3.31460300  | -3.32598400 |
| Ni | -1.46256600 | 0.24590900  | 0.26281000  |
| C  | 5.76327700  | 2.79019200  | -0.56545300 |
| C  | 6.56464200  | 1.68635600  | -0.77749200 |
| C  | 6.00592700  | 0.37647800  | -0.75174800 |
| C  | 4.63654500  | 0.29199400  | -0.50272200 |
| C  | 3.80182800  | 1.42800300  | -0.28182500 |
| C  | 4.36730400  | 2.68292100  | -0.31484000 |
| H  | 7.76605700  | -0.85028600 | -1.15262300 |
| H  | 6.21231300  | 3.78712900  | -0.59116300 |
| H  | 7.63533300  | 1.81248600  | -0.96777600 |
| C  | 6.68971000  | -0.85599200 | -0.95300600 |
| C  | 3.91607700  | -0.93818300 | -0.44237400 |
| H  | 3.76679200  | 3.58468400  | -0.15608700 |

---

|   |             |             |             |
|---|-------------|-------------|-------------|
| C | 4.60321900  | -2.11530600 | -0.64129000 |
| C | 6.00022800  | -2.05097200 | -0.89742100 |
| H | 4.09479200  | -3.08497400 | -0.60586700 |
| H | 6.54336000  | -2.98702100 | -1.05530200 |
| C | 2.48443500  | 0.84525700  | -0.07851300 |
| C | 2.54828300  | -0.51969000 | -0.16403500 |
| C | -2.47164200 | -2.37320000 | 0.51009200  |
| C | -3.04599500 | -3.45259800 | 1.18139400  |
| C | -3.19031800 | -3.42468200 | 2.56880500  |
| C | -2.74152000 | -2.31216500 | 3.27785500  |
| C | -2.14803200 | -1.23985600 | 2.60657700  |
| C | -2.01062200 | -1.25462700 | 1.21347500  |
| H | -2.40652200 | -2.40228500 | -0.58602800 |
| H | -3.40017400 | -4.31735000 | 0.61004900  |
| H | -2.85246300 | -2.27439100 | 4.36724200  |
| H | -1.81183400 | -0.37471900 | 3.19261100  |
| C | -4.22423700 | -0.62484400 | -3.15090400 |
| C | -3.42666000 | -0.12588600 | -2.13362200 |
| C | -3.97549100 | 0.47031600  | -0.97457100 |
| C | -5.38891700 | 0.53489100  | -0.87729000 |
| C | -6.17220300 | 0.03241200  | -1.91782700 |
| C | -5.61546400 | -0.54222800 | -3.05624200 |
| H | -3.75626300 | -1.07657200 | -4.03254700 |
| H | -2.33269300 | -0.17310000 | -2.21177300 |
| C | -6.02273800 | 1.11294700  | 0.35614000  |
| H | -7.26315300 | 0.08687700  | -1.81478900 |
| H | -6.25511500 | -0.92720000 | -3.85531100 |
| C | -5.05640100 | 1.05749800  | 1.52403400  |
| C | -3.71050300 | 1.65664000  | 1.13070300  |
| H | -6.33318500 | 2.16177500  | 0.17456100  |

---

|   |             |             |             |
|---|-------------|-------------|-------------|
| H | -5.46417100 | 1.58091700  | 2.40657000  |
| N | -3.11897900 | 0.95548800  | -0.00603900 |
| H | -4.88706600 | 0.00339600  | 1.81576000  |
| H | -6.95492600 | 0.56794200  | 0.58668100  |
| H | -0.49755300 | 6.17188500  | 0.49589400  |
| C | 2.16241700  | 3.42004200  | 3.65095900  |
| H | 2.93876200  | 4.01872200  | 3.14646000  |
| H | 1.46948400  | 4.11636500  | 4.15360800  |
| H | 2.65102800  | 2.83163700  | 4.44372100  |
| C | -1.47670600 | 2.72509700  | -2.86808600 |
| H | -1.35068300 | 3.72355800  | -3.32143000 |
| H | -1.68911000 | 2.02063900  | -3.68910900 |
| H | -2.36086500 | 2.73952900  | -2.20875500 |
| H | -3.65629600 | -4.26437000 | 3.09372800  |
| C | 0.58076800  | -3.57345400 | 3.46084200  |
| H | 0.64249300  | -3.05274200 | 4.43056000  |
| H | -0.48206400 | -3.77534800 | 3.25475200  |
| H | 1.10417100  | -4.53836100 | 3.58222400  |
| C | 2.71710100  | -2.58488500 | 2.64057500  |
| H | 3.21791100  | -3.56395500 | 2.53241800  |
| H | 3.21437000  | -1.87853600 | 1.95799800  |
| H | 2.89484900  | -2.23234800 | 3.67029300  |
| C | -0.64475500 | -2.11035800 | -3.50150900 |
| H | -1.57356100 | -2.18570500 | -2.91229100 |
| H | -0.76643300 | -1.28058200 | -4.21963900 |
| H | -0.54392700 | -3.03636000 | -4.09336100 |
| C | 1.85729200  | -1.93936700 | -3.43830600 |
| H | 2.74653200  | -1.66954700 | -2.84525000 |
| H | 2.01226900  | -2.96073900 | -3.82880100 |
| H | 1.80809000  | -1.25653500 | -4.30286100 |

---

|               |             |             |             |
|---------------|-------------|-------------|-------------|
| H             | 0.24785200  | -6.12978400 | -0.70651100 |
| C             | -3.77508100 | 3.15293400  | 0.85330800  |
| H             | -4.35519400 | 3.36839000  | -0.06088700 |
| H             | -4.24005400 | 3.70130200  | 1.69130900  |
| H             | -2.75808000 | 3.55276600  | 0.69744800  |
| H             | -3.02287500 | 1.51486200  | 1.98985900  |
| <b>TS7-L2</b> |             |             |             |
| C             | 0.45987800  | 0.09943600  | 0.12938700  |
| N             | 1.23410300  | -1.01400400 | -0.08057600 |
| N             | 1.34308600  | 1.15354100  | 0.07753600  |
| C             | 0.74415500  | -2.35892000 | -0.11444700 |
| C             | -0.01056800 | -5.00891200 | -0.20818900 |
| C             | 0.43587700  | -2.92480400 | -1.36094100 |
| C             | 0.61754200  | -3.06165200 | 1.09829300  |
| C             | 0.23963000  | -4.40359000 | 1.01987400  |
| C             | 0.07004800  | -4.27420100 | -1.38410800 |
| H             | 0.12361300  | -4.98678100 | 1.93702800  |
| H             | -0.16571200 | -4.75280900 | -2.33998100 |
| C             | 0.98669100  | 2.51633600  | 0.32416200  |
| C             | 0.32966500  | 5.15151500  | 0.81855400  |
| C             | 0.69099200  | 3.35096500  | -0.76638900 |
| C             | 0.98881400  | 2.97225900  | 1.65371100  |
| C             | 0.64628900  | 4.30793200  | 1.87807700  |
| C             | 0.35384600  | 4.67861300  | -0.48918100 |
| H             | 0.62390500  | 4.69425100  | 2.90178100  |
| H             | 0.10217600  | 5.35390500  | -1.31265900 |
| C             | 1.26931700  | 2.03269800  | 2.80690000  |
| H             | 1.84655900  | 1.17586500  | 2.41146300  |
| C             | 0.65330400  | 2.81164700  | -2.17999300 |
| H             | 1.29366700  | 1.91013100  | -2.21113200 |

---

|    |             |             |             |
|----|-------------|-------------|-------------|
| C  | 0.85310800  | -2.37359700 | 2.42946500  |
| H  | 0.39674400  | -1.36869400 | 2.33143700  |
| C  | 0.48692200  | -2.11554200 | -2.64092400 |
| H  | 0.45373000  | -1.04623700 | -2.35612900 |
| C  | -0.05011000 | 1.48013500  | 3.34229400  |
| H  | -0.61473400 | 0.98395400  | 2.53156300  |
| H  | -0.67786300 | 2.29407900  | 3.74921200  |
| H  | 0.11996000  | 0.74367500  | 4.14749200  |
| C  | 1.19573700  | 3.78779200  | -3.21340600 |
| H  | 1.25058800  | 3.30451300  | -4.20211600 |
| H  | 2.20657800  | 4.14247000  | -2.95236700 |
| H  | 0.54504100  | 4.67144000  | -3.32774800 |
| Ni | -1.38907200 | 0.32251400  | 0.21319000  |
| C  | 6.09366200  | 2.32380000  | -0.46226900 |
| C  | 6.79495500  | 1.14854200  | -0.64197900 |
| C  | 6.11046200  | -0.10088100 | -0.65973000 |
| C  | 4.72713600  | -0.05143600 | -0.49462700 |
| C  | 3.99486700  | 1.15923300  | -0.30602300 |
| C  | 4.68183800  | 2.35213200  | -0.28846200 |
| H  | 7.76557400  | -1.49491700 | -0.94688500 |
| H  | 6.63860300  | 3.27208600  | -0.44908200 |
| H  | 7.88230200  | 1.17009500  | -0.76765300 |
| C  | 6.68344800  | -1.39537600 | -0.81408100 |
| C  | 3.88819200  | -1.20602200 | -0.47686600 |
| H  | 4.16623400  | 3.30680300  | -0.14253700 |
| C  | 4.47081600  | -2.44598200 | -0.61882500 |
| C  | 5.88070600  | -2.51846000 | -0.78968500 |
| H  | 3.87157100  | -3.36277200 | -0.60205600 |
| H  | 6.34043600  | -3.50425300 | -0.90432900 |
| C  | 2.62019500  | 0.70607500  | -0.16951900 |

---

|   |             |             |             |
|---|-------------|-------------|-------------|
| C | 2.55310300  | -0.65825900 | -0.27350200 |
| C | -2.89480200 | -2.10054200 | 0.29530100  |
| C | -3.27684700 | -3.25222500 | 0.97120700  |
| C | -3.44871000 | -3.25645100 | 2.35697100  |
| C | -3.19447900 | -2.07653000 | 3.05490600  |
| C | -2.78819200 | -0.92066400 | 2.39403900  |
| C | -2.63840400 | -0.89108900 | 0.98591300  |
| H | -2.79092300 | -2.14639800 | -0.79236900 |
| H | -3.44867900 | -4.16751700 | 0.39439300  |
| H | -3.29715500 | -2.05129600 | 4.14563900  |
| H | -2.57768900 | -0.03163600 | 2.99646900  |
| C | -4.03597400 | -0.39411000 | -3.30702600 |
| C | -3.32924800 | -0.13711500 | -2.14144800 |
| C | -3.95540400 | 0.40596700  | -1.00372100 |
| C | -5.33057700 | 0.72075500  | -1.07930400 |
| C | -6.01861500 | 0.46693600  | -2.26863900 |
| C | -5.39615300 | -0.09185900 | -3.37929000 |
| H | -3.51593600 | -0.82050000 | -4.17121400 |
| H | -2.25303100 | -0.33853700 | -2.08043300 |
| C | -6.04090100 | 1.37089400  | 0.07565600  |
| H | -7.08536300 | 0.71871800  | -2.31057100 |
| H | -5.96271200 | -0.28238000 | -4.29502000 |
| C | -5.23793700 | 1.29618100  | 1.36029100  |
| C | -3.77008300 | 1.60922800  | 1.09315900  |
| H | -6.24105900 | 2.43062600  | -0.18054300 |
| H | -5.64587900 | 1.98462200  | 2.12045500  |
| N | -3.21248100 | 0.62136100  | 0.16565400  |
| H | -5.29077900 | 0.27691800  | 1.78494500  |
| H | -7.03675200 | 0.91267600  | 0.20706200  |
| H | 0.06195000  | 6.19392700  | 1.01458100  |

---

|   |             |             |             |
|---|-------------|-------------|-------------|
| C | 2.10070900  | 2.66678800  | 3.91219500  |
| H | 3.03207800  | 3.10880300  | 3.52134800  |
| H | 1.54652600  | 3.45876600  | 4.44445400  |
| H | 2.37433600  | 1.90932900  | 4.66460500  |
| C | -0.77037200 | 2.37516400  | -2.51659000 |
| H | -1.45725900 | 3.24047400  | -2.52265500 |
| H | -0.82370600 | 1.88781000  | -3.50532900 |
| H | -1.15144100 | 1.66216000  | -1.76130400 |
| H | -3.76967200 | -4.16108900 | 2.88107900  |
| C | 0.16717200  | -3.07139600 | 3.59383700  |
| H | 0.20965900  | -2.43129800 | 4.49091900  |
| H | -0.89170500 | -3.28527200 | 3.38228700  |
| H | 0.67092300  | -4.01996300 | 3.85266800  |
| C | 2.33879300  | -2.21014100 | 2.74760200  |
| H | 2.83184500  | -3.19779800 | 2.79643500  |
| H | 2.88339500  | -1.60329200 | 2.00843300  |
| H | 2.46834500  | -1.72617100 | 3.73091700  |
| C | -0.71659700 | -2.38063300 | -3.53807700 |
| H | -1.66613800 | -2.32436600 | -2.98047800 |
| H | -0.75635500 | -1.63946700 | -4.35437500 |
| H | -0.66449000 | -3.37650400 | -4.01082300 |
| C | 1.78597900  | -2.36041400 | -3.40343000 |
| H | 2.67391300  | -2.09368600 | -2.80795400 |
| H | 1.87611500  | -3.42566400 | -3.68120600 |
| H | 1.81338200  | -1.76881400 | -4.33364300 |
| H | -0.29771200 | -6.06401000 | -0.24406900 |
| H | -3.21933100 | 1.51133800  | 2.04226900  |
| C | -3.52204200 | 3.02147100  | 0.58225300  |
| H | -4.00266500 | 3.76807400  | 1.23804200  |
| H | -2.43850600 | 3.23339400  | 0.55144100  |



---

|                |             |             |             |
|----------------|-------------|-------------|-------------|
| H              | -3.91243800 | 3.16441300  | -0.43959300 |
| <b>INT8-L2</b> |             |             |             |
| C              | -0.05236500 | -0.53558200 | 0.04512000  |
| N              | 1.00380100  | 0.36331700  | -0.07290400 |
| N              | 0.08685700  | -1.02546800 | 1.33585400  |
| C              | 1.31755300  | 0.97721000  | -1.31839800 |
| C              | 1.83526200  | 2.09691300  | -3.81845000 |
| C              | 0.66004700  | 2.16255700  | -1.68303200 |
| C              | 2.23463800  | 0.34432900  | -2.17056000 |
| C              | 2.45926800  | 0.91032000  | -3.42679700 |
| C              | 0.94713100  | 2.71372500  | -2.93037300 |
| H              | 3.13763100  | 0.40488900  | -4.12530000 |
| H              | 0.44195800  | 3.63764000  | -3.23600200 |
| C              | -0.73903200 | -2.02772400 | 1.93360400  |
| C              | -2.14399300 | -3.98944200 | 3.29373400  |
| C              | -1.76789800 | -1.63775800 | 2.81128800  |
| C              | -0.45086100 | -3.38051300 | 1.66808800  |
| C              | -1.17041100 | -4.35154100 | 2.36865100  |
| C              | -2.44873100 | -2.64913000 | 3.49802000  |
| H              | -0.96065600 | -5.41084900 | 2.19150800  |
| H              | -3.24481500 | -2.38067000 | 4.19877700  |
| C              | 0.61562800  | -3.76980600 | 0.66622300  |
| H              | 0.64470100  | -2.95699600 | -0.08326900 |
| C              | -2.14275700 | -0.18208000 | 3.01411500  |
| H              | -1.90782000 | 0.33923400  | 2.06494300  |
| C              | 2.97419100  | -0.89597000 | -1.69971700 |
| H              | 2.34969500  | -1.34956700 | -0.91128500 |
| C              | -0.32367500 | 2.78118900  | -0.70245900 |
| H              | -0.89592900 | 1.92484000  | -0.29534300 |
| C              | 2.12417700  | 2.71238900  | -5.15345600 |

---

|    |             |             |             |
|----|-------------|-------------|-------------|
| H  | 2.91619200  | 3.47778300  | -5.07781100 |
| C  | 0.29339200  | -5.05462600 | -0.08436900 |
| H  | -0.73528700 | -5.05083600 | -0.48281700 |
| H  | 0.40205400  | -5.94868100 | 0.55437500  |
| H  | 0.98909200  | -5.18022000 | -0.93192100 |
| C  | -1.33790200 | 0.47455700  | 4.13320700  |
| H  | -1.67106300 | 1.51670100  | 4.28114700  |
| H  | -0.25627900 | 0.49203500  | 3.93162500  |
| H  | -1.49236400 | -0.06249700 | 5.08667200  |
| Ni | -1.23282900 | -1.07191800 | -1.27625700 |
| H  | 2.46802100  | 1.96160000  | -5.88116200 |
| H  | 1.23604400  | 3.21303000  | -5.56935700 |
| C  | 3.09464000  | -1.97128000 | -2.76329600 |
| C  | 2.03784000  | -2.87836700 | -2.90162900 |
| C  | 4.20359700  | -2.10333600 | -3.60263200 |
| C  | 2.07881800  | -3.88420000 | -3.86288000 |
| H  | 1.16486800  | -2.76545900 | -2.24572600 |
| C  | 4.24548800  | -3.10813900 | -4.56920100 |
| H  | 5.05360000  | -1.42143200 | -3.49004000 |
| C  | 3.18496600  | -4.00081000 | -4.70390000 |
| H  | 1.24073300  | -4.58395500 | -3.95382700 |
| H  | 5.12186600  | -3.19822900 | -5.21804900 |
| H  | 3.22314000  | -4.79151200 | -5.45881000 |
| C  | 0.39680600  | 3.40974900  | 0.47191600  |
| C  | 1.40541600  | 4.35903100  | 0.27534200  |
| C  | 0.06445100  | 3.04951400  | 1.78073200  |
| C  | 2.06347800  | 4.93417200  | 1.35973100  |
| H  | 1.67637500  | 4.64679800  | -0.74774600 |
| C  | 0.72968100  | 3.61341300  | 2.86846700  |
| H  | -0.71623900 | 2.29562100  | 1.94828900  |

---

|   |             |             |             |
|---|-------------|-------------|-------------|
| C | 1.73131100  | 4.55819000  | 2.66078400  |
| H | 2.84960400  | 5.67599700  | 1.18789200  |
| H | 0.46680000  | 3.30426400  | 3.88487400  |
| H | 2.25953800  | 4.99653700  | 3.51253200  |
| C | 2.92979500  | -0.90518000 | 5.36430400  |
| C | 3.92094400  | 0.03277800  | 5.15117300  |
| C | 3.98375900  | 0.74186700  | 3.91814000  |
| C | 3.00543500  | 0.43377900  | 2.97394700  |
| C | 1.96818900  | -0.52220200 | 3.19079000  |
| C | 1.93612200  | -1.19902400 | 4.39123300  |
| H | 5.72951800  | 2.01385500  | 4.24293400  |
| H | 2.90075400  | -1.44288000 | 6.31661300  |
| H | 4.66509000  | 0.23431700  | 5.92879000  |
| C | 4.93967400  | 1.72927400  | 3.53992100  |
| C | 2.92960300  | 1.03380600  | 1.68181800  |
| H | 1.16219500  | -1.94518400 | 4.60396300  |
| C | 3.86866000  | 1.97869900  | 1.34241200  |
| C | 4.87140800  | 2.31621400  | 2.29359000  |
| H | 3.86030500  | 2.46792800  | 0.36374000  |
| H | 5.61715300  | 3.06755400  | 2.01571500  |
| C | 1.20098500  | -0.48492200 | 1.95420700  |
| C | 1.76825600  | 0.39699400  | 1.07469300  |
| C | -2.97217900 | -0.40821600 | -2.39364400 |
| C | -1.90497000 | -0.62877300 | -3.28503100 |
| C | -1.22496000 | -1.86010800 | -3.28781700 |
| C | -1.61453100 | -2.85687900 | -2.36867400 |
| C | -2.67001200 | -2.63587400 | -1.45646400 |
| C | -3.37198800 | -1.40133000 | -1.46117200 |
| H | -3.51271300 | 0.54237300  | -2.41744800 |
| H | -1.61677600 | 0.15790200  | -3.99051500 |

---

|   |             |             |             |
|---|-------------|-------------|-------------|
| H | -1.08293600 | -3.81469100 | -2.34860300 |
| H | -2.92987700 | -3.41506600 | -0.73318800 |
| C | -4.13318100 | 2.31133500  | 0.60780100  |
| C | -3.81286100 | 1.06208200  | 0.09766600  |
| C | -4.79273400 | 0.06532100  | -0.07329300 |
| C | -6.11583600 | 0.34674500  | 0.33304000  |
| C | -6.40859400 | 1.60913800  | 0.85820400  |
| C | -5.44331800 | 2.59998400  | 0.99090800  |
| H | -3.34304600 | 3.06591400  | 0.70627800  |
| H | -2.77766000 | 0.82620000  | -0.17003000 |
| C | -7.20037600 | -0.69103300 | 0.24021600  |
| H | -7.44346300 | 1.81138000  | 1.15968500  |
| H | -5.70677300 | 3.58400300  | 1.38791400  |
| C | -6.80856100 | -1.84405600 | -0.66247400 |
| C | -5.38682500 | -2.30825000 | -0.36713400 |
| H | -7.43263500 | -1.06898000 | 1.25556700  |
| H | -7.50939300 | -2.68914100 | -0.55198900 |
| N | -4.46004200 | -1.19563900 | -0.59568900 |
| C | -5.22727500 | -2.90986800 | 1.01990800  |
| H | -5.47181700 | -2.18201500 | 1.81135400  |
| H | -5.89095900 | -3.78122400 | 1.14884400  |
| H | -4.18718500 | -3.23268200 | 1.19493500  |
| H | -5.12917800 | -3.07894100 | -1.11283800 |
| H | -6.85060500 | -1.52627600 | -1.71966500 |
| H | -8.13569100 | -0.22207300 | -0.11167600 |
| H | -2.68634900 | -4.76246900 | 3.84652300  |
| C | 1.98962400  | -3.87466700 | 1.32102600  |
| H | 2.76061800  | -4.10756200 | 0.56484200  |
| H | 2.28097000  | -2.94270100 | 1.83366000  |
| H | 2.00083100  | -4.68390800 | 2.07318200  |

---

|   |             |             |             |
|---|-------------|-------------|-------------|
| C | -3.62864900 | 0.01209600  | 3.28296000  |
| H | -3.91329700 | -0.34546900 | 4.28814700  |
| H | -3.88443400 | 1.08326300  | 3.23483800  |
| H | -4.25451100 | -0.50458000 | 2.53768100  |
| C | 4.30009800  | -0.56604600 | -1.03475700 |
| C | 4.69514900  | -1.31440800 | 0.07946900  |
| C | 5.15131100  | 0.44437100  | -1.49096400 |
| C | 5.90103800  | -1.06129100 | 0.72502100  |
| H | 4.02920000  | -2.09959300 | 0.45496600  |
| C | 6.36527500  | 0.69582400  | -0.85186600 |
| H | 4.85618300  | 1.05719800  | -2.34962500 |
| C | 6.74252900  | -0.05243300 | 0.26020400  |
| H | 6.17948000  | -1.64895500 | 1.60486100  |
| H | 7.01792900  | 1.49158300  | -1.22415900 |
| H | 7.68872800  | 0.15412300  | 0.76891700  |
| C | -1.37018400 | 3.67585900  | -1.34119200 |
| C | -2.18078000 | 3.12858900  | -2.34515600 |
| C | -1.63337100 | 4.97961900  | -0.91639900 |
| C | -3.22450800 | 3.85444300  | -2.90419500 |
| H | -1.98312700 | 2.10183100  | -2.67114800 |
| C | -2.68221300 | 5.71268000  | -1.47681400 |
| H | -1.02518900 | 5.42888400  | -0.12550600 |
| C | -3.48218600 | 5.15487000  | -2.46781300 |
| H | -3.84981500 | 3.39965400  | -3.67883000 |
| H | -2.87480000 | 6.73096300  | -1.12575400 |
| H | -4.30717100 | 5.72862900  | -2.89977200 |
| H | -0.39360100 | -2.03357000 | -3.97699400 |

**INT1-L4**

|   |             |             |             |
|---|-------------|-------------|-------------|
| C | -0.03230800 | 0.01317500  | 0.14449400  |
| N | 0.56583300  | -0.09378800 | -1.12522200 |

---

|    |             |             |             |
|----|-------------|-------------|-------------|
| N  | 1.07595500  | -0.02962700 | 1.01186500  |
| C  | -0.24013600 | -0.33091600 | -2.26855400 |
| C  | -1.89260900 | -0.84066400 | -4.45851500 |
| C  | -0.90593900 | 0.74414400  | -2.88526200 |
| C  | -0.44665100 | -1.65657500 | -2.67563700 |
| C  | -1.28069800 | -1.88924600 | -3.77286800 |
| C  | -1.70844600 | 0.46530600  | -3.98855000 |
| H  | -1.50311100 | -2.92360900 | -4.06483300 |
| H  | -2.25765500 | 1.28345200  | -4.46873200 |
| C  | 0.90475100  | 0.31823300  | 2.37532900  |
| C  | 0.45639800  | 1.06636700  | 5.02468400  |
| C  | 1.13302500  | 1.64659000  | 2.75829500  |
| C  | 0.38848100  | -0.63489800 | 3.27480700  |
| C  | 0.19657000  | -0.24229000 | 4.59625700  |
| C  | 0.90122600  | 2.00032100  | 4.09137000  |
| H  | -0.21981700 | -0.96029300 | 5.31248200  |
| H  | 1.02189400  | 3.04835500  | 4.39444000  |
| C  | -0.05452900 | -1.98310300 | 2.73405100  |
| H  | -0.55480700 | -1.72281300 | 1.77287400  |
| C  | 1.52143900  | 2.67398800  | 1.70915200  |
| H  | 1.30347100  | 2.21250300  | 0.73158900  |
| C  | 0.17681500  | 1.45568500  | 6.44452300  |
| H  | 0.53437000  | 2.47227300  | 6.66861000  |
| C  | 0.14554900  | -2.79595600 | -1.86357800 |
| H  | 0.45921300  | -2.35851800 | -0.90038000 |
| C  | -0.81255600 | 2.12872000  | -2.26468800 |
| H  | -0.83294600 | 1.93047900  | -1.17022700 |
| Ni | -1.75247800 | 0.14867700  | 0.53764000  |
| H  | 0.65327600  | 0.76138600  | 7.15662000  |
| H  | -0.90659100 | 1.43051000  | 6.65445500  |

---

|   |             |             |             |
|---|-------------|-------------|-------------|
| C | -0.92311900 | -3.80131400 | -1.46753200 |
| C | -1.98197000 | -3.32868600 | -0.67612300 |
| C | -0.87874900 | -5.15602900 | -1.79658600 |
| C | -2.97753700 | -4.19170100 | -0.23601200 |
| H | -2.00188100 | -2.26801900 | -0.37208100 |
| C | -1.87677800 | -6.02502900 | -1.34628700 |
| H | -0.04877900 | -5.54362000 | -2.39750500 |
| C | -2.92786500 | -5.54724500 | -0.56944900 |
| H | -3.79322700 | -3.79487300 | 0.37755900  |
| H | -1.82668400 | -7.08718100 | -1.60769000 |
| H | -3.70848000 | -6.22988000 | -0.21944400 |
| C | 0.47408600  | 2.87107700  | -2.55185900 |
| C | 1.41994200  | 2.43272500  | -3.48133100 |
| C | 0.73928400  | 4.05504800  | -1.84488700 |
| C | 2.60081700  | 3.14645500  | -3.69575700 |
| H | 1.23078600  | 1.51346400  | -4.04635700 |
| C | 1.91022800  | 4.77206400  | -2.06196600 |
| H | 0.00724200  | 4.41246500  | -1.11003100 |
| C | 2.85041900  | 4.31951200  | -2.99016800 |
| H | 3.33202700  | 2.77416200  | -4.42083500 |
| H | 2.09771600  | 5.68504000  | -1.48713500 |
| H | 3.77706900  | 4.87831900  | -3.15529400 |
| C | 0.59862000  | 3.88093700  | 1.74025800  |
| C | 1.02443300  | 5.18033700  | 2.01504500  |
| C | -0.74799600 | 3.66311700  | 1.40989100  |
| C | 0.12181900  | 6.24615100  | 1.96116500  |
| H | 2.07655200  | 5.36880100  | 2.25500700  |
| C | -1.64451500 | 4.72356000  | 1.35681600  |
| H | -1.08562900 | 2.64100000  | 1.16090800  |
| C | -1.21168500 | 6.02285000  | 1.63243600  |

---

|   |             |             |             |
|---|-------------|-------------|-------------|
| H | 0.47163900  | 7.26180200  | 2.17311400  |
| H | -2.68754400 | 4.53131300  | 1.08153800  |
| H | -1.91487900 | 6.85997100  | 1.58282600  |
| C | 1.05834100  | -2.95177800 | 2.40063500  |
| C | 2.38584800  | -2.76716100 | 2.79201200  |
| C | 0.73487600  | -4.10440800 | 1.66699800  |
| C | 3.36709100  | -3.70403200 | 2.45956200  |
| H | 2.65701700  | -1.87434700 | 3.36655300  |
| C | 1.70751700  | -5.04246800 | 1.34274300  |
| H | -0.30360800 | -4.25939800 | 1.34678000  |
| C | 3.03224600  | -4.84679000 | 1.73940800  |
| H | 4.40377700  | -3.53209800 | 2.76739800  |
| H | 1.42918700  | -5.92444200 | 0.75644300  |
| H | 3.80137500  | -5.57989900 | 1.47638300  |
| C | 5.99683800  | -0.34190000 | 1.20314200  |
| C | 6.46402200  | -0.47117900 | -0.08866600 |
| C | 5.54586700  | -0.48825300 | -1.17979500 |
| C | 4.19701400  | -0.36529200 | -0.85827900 |
| C | 3.70076900  | -0.23952100 | 0.47617500  |
| C | 4.61203900  | -0.22599500 | 1.50879200  |
| H | 6.90525200  | -0.72296900 | -2.87494400 |
| H | 6.71356800  | -0.32091600 | 2.03034000  |
| H | 7.53842200  | -0.55834300 | -0.28383700 |
| C | 5.85978300  | -0.61858700 | -2.56481500 |
| C | 3.14383400  | -0.35313700 | -1.82322600 |
| H | 4.29386200  | -0.11241900 | 2.55034200  |
| C | 3.47716800  | -0.48626500 | -3.15234400 |
| C | 4.84940700  | -0.61823500 | -3.50442000 |
| H | 2.71089900  | -0.50831900 | -3.93413400 |
| H | 5.10468600  | -0.73035400 | -4.56296300 |



---

|   |             |             |             |
|---|-------------|-------------|-------------|
| C | 2.25884200  | -0.14624600 | 0.30800900  |
| C | 1.93672700  | -0.20680500 | -1.02426400 |
| C | -2.76786600 | -1.09865900 | -5.64709900 |
| H | -2.22606900 | -0.92608500 | -6.59408500 |
| H | -3.13340500 | -2.13755500 | -5.66342400 |
| H | -3.64297900 | -0.42873600 | -5.65122900 |
| C | -1.14041600 | -2.63230500 | 3.56637900  |
| C | -0.84694900 | -3.46962500 | 4.64763200  |
| C | -2.48008300 | -2.38198200 | 3.24834000  |
| C | -1.86962600 | -4.03666200 | 5.40509300  |
| H | 0.20106100  | -3.68267200 | 4.89114400  |
| C | -3.50289600 | -2.95350700 | 4.00252900  |
| H | -2.70525300 | -1.72609400 | 2.39244100  |
| C | -3.20193300 | -3.77996800 | 5.08393300  |
| H | -1.62447800 | -4.68993100 | 6.24887900  |
| H | -4.54545700 | -2.75170400 | 3.73568300  |
| H | -4.00646400 | -4.23032000 | 5.67412100  |
| C | 3.00137800  | 2.99546400  | 1.67520800  |
| C | 3.75402500  | 3.23821400  | 2.82864000  |
| C | 3.65121000  | 3.04578000  | 0.43654900  |
| C | 5.11495900  | 3.53047600  | 2.74496000  |
| H | 3.27218800  | 3.18541600  | 3.81058800  |
| C | 5.00959700  | 3.33632800  | 0.34842400  |
| H | 3.07944900  | 2.83738600  | -0.47559900 |
| C | 5.74823400  | 3.58033800  | 1.50467700  |
| H | 5.68632800  | 3.71479900  | 3.66049700  |
| H | 5.49319100  | 3.35415700  | -0.63379900 |
| H | 6.81851700  | 3.80010200  | 1.44049500  |
| C | -2.05639300 | 2.95265900  | -2.52745800 |
| C | -2.15858100 | 3.84694500  | -3.59671800 |

---

|   |             |             |             |
|---|-------------|-------------|-------------|
| C | -3.16686900 | 2.75738500  | -1.69825400 |
| C | -3.35421100 | 4.52179300  | -3.84175000 |
| H | -1.29046100 | 4.01339200  | -4.24585300 |
| C | -4.36459400 | 3.42120000  | -1.94897700 |
| H | -3.07767700 | 2.06601600  | -0.84725800 |
| C | -4.46164300 | 4.30602600  | -3.02253900 |
| H | -3.42214100 | 5.21923900  | -4.68326500 |
| H | -5.22696800 | 3.22879600  | -1.30082600 |
| H | -5.40271900 | 4.82834800  | -3.22276500 |
| C | 1.40618600  | -3.38232900 | -2.46607000 |
| C | 1.50560900  | -3.74061300 | -3.81489600 |
| C | 2.52856700  | -3.56349400 | -1.64991900 |
| C | 2.68878800  | -4.26822700 | -4.32949400 |
| H | 0.64704500  | -3.59445600 | -4.47840100 |
| C | 3.71282700  | -4.08933500 | -2.15931900 |
| H | 2.47388700  | -3.27368200 | -0.59428700 |
| C | 3.79818200  | -4.44366300 | -3.50397200 |
| H | 2.74477800  | -4.53959900 | -5.38867700 |
| H | 4.57779100  | -4.20493800 | -1.49769800 |
| H | 4.72990700  | -4.84904200 | -3.91086100 |
| C | -5.00406000 | -0.70974300 | -2.37843600 |
| C | -4.11858100 | -0.45702500 | -1.34585700 |
| C | -4.53938700 | 0.04010800  | -0.08192200 |
| C | -5.93571400 | 0.30350100  | 0.05719500  |
| C | -6.80677100 | 0.04577200  | -1.00244100 |
| C | -6.37325700 | -0.46834900 | -2.22233700 |
| H | -4.61138700 | -1.10000800 | -3.32557100 |
| H | -3.04320200 | -0.62297200 | -1.48275500 |
| C | -6.45147200 | 0.91385700  | 1.33302400  |
| H | -7.87218000 | 0.27289300  | -0.85637000 |

---

|   |             |             |             |
|---|-------------|-------------|-------------|
| H | -7.08069000 | -0.66433200 | -3.03399900 |
| C | -5.32476600 | 1.59399700  | 2.08336000  |
| C | -4.13877500 | 0.64320000  | 2.20058900  |
| H | -7.27250900 | 1.62083600  | 1.10890300  |
| H | -4.98253300 | 2.49479900  | 1.53262800  |
| N | -3.60969300 | 0.27776800  | 0.89698100  |
| C | -3.06363000 | 1.23169300  | 3.09135000  |
| H | -2.73944100 | 2.21488600  | 2.70568700  |
| H | -3.43683200 | 1.37357400  | 4.12205000  |
| H | -2.17021400 | 0.58568200  | 3.12734700  |
| H | -4.52939100 | -0.27404200 | 2.71493600  |
| H | -5.65100800 | 1.92944700  | 3.08503700  |
| H | -6.89843200 | 0.13653400  | 1.98685700  |

**INT2-L4**

|   |             |             |             |
|---|-------------|-------------|-------------|
| C | -0.05915100 | -0.18797100 | -0.43070000 |
| N | 0.27180500  | -0.53300800 | 0.86434500  |
| N | -0.47292500 | 1.12408100  | -0.34070800 |
| C | 0.53757800  | -1.89825500 | 1.18997200  |
| C | 0.94318900  | -4.63515400 | 1.49501500  |
| C | 1.83255600  | -2.41579900 | 1.00536200  |
| C | -0.54440100 | -2.70816000 | 1.55542800  |
| C | -0.31820100 | -4.08067100 | 1.69904700  |
| C | 2.00736100  | -3.78581200 | 1.16710100  |
| H | -1.16471500 | -4.73829300 | 1.93245100  |
| H | 2.99293800  | -4.22687100 | 0.98650200  |
| C | -0.71055700 | 1.91715900  | -1.50546900 |
| C | -1.06080200 | 3.39953100  | -3.84598900 |
| C | 0.33792200  | 2.72256800  | -1.97126400 |
| C | -1.93439300 | 1.81496600  | -2.19823900 |
| C | -2.08264000 | 2.57832600  | -3.35453500 |

---

|    |             |             |             |
|----|-------------|-------------|-------------|
| C  | 0.14527400  | 3.44360800  | -3.15354600 |
| H  | -3.01682700 | 2.51243000  | -3.92190700 |
| H  | 0.97881300  | 4.02749500  | -3.56250900 |
| C  | -3.00443200 | 0.83161000  | -1.74407600 |
| H  | -2.46036100 | -0.13015300 | -1.61119300 |
| C  | 1.66931300  | 2.77650300  | -1.24214800 |
| H  | 1.68972300  | 1.91910400  | -0.54597200 |
| C  | -1.27097300 | 4.19817500  | -5.09502800 |
| H  | -0.31897000 | 4.55254100  | -5.51787400 |
| C  | -1.92184700 | -2.10532300 | 1.76351800  |
| H  | -1.93998200 | -1.14308700 | 1.22177400  |
| C  | 2.95708800  | -1.46485900 | 0.63858000  |
| H  | 2.53119000  | -0.76865700 | -0.10709700 |
| Ni | -0.13781800 | -1.30311100 | -1.92929400 |
| H  | -1.89561000 | 5.08674900  | -4.89911900 |
| H  | -1.79161200 | 3.60927400  | -5.86665300 |
| C  | -3.00784800 | -2.92002800 | 1.08526800  |
| C  | -2.92630400 | -3.04692900 | -0.30916400 |
| C  | -4.09702200 | -3.48071400 | 1.74980400  |
| C  | -3.90907500 | -3.72313300 | -1.02088200 |
| H  | -2.08199500 | -2.56185700 | -0.82422800 |
| C  | -5.08704100 | -4.15988000 | 1.03381500  |
| H  | -4.18645100 | -3.37514600 | 2.83599600  |
| C  | -4.99731700 | -4.28488500 | -0.34832700 |
| H  | -3.83912100 | -3.80489100 | -2.11112400 |
| H  | -5.93914400 | -4.59145900 | 1.56761000  |
| H  | -5.77605700 | -4.81322700 | -0.90580500 |
| C  | 3.41027500  | -0.61530700 | 1.81380800  |
| C  | 3.38937200  | -1.08132400 | 3.13090500  |
| C  | 3.93474600  | 0.65769800  | 1.56319500  |

---

|   |             |             |             |
|---|-------------|-------------|-------------|
| C | 3.87515400  | -0.29255200 | 4.17328400  |
| H | 2.97757500  | -2.07477300 | 3.34522000  |
| C | 4.41371700  | 1.44970500  | 2.60325100  |
| H | 3.97275200  | 1.02611000  | 0.52799800  |
| C | 4.38294800  | 0.97749000  | 3.91495400  |
| H | 3.84617500  | -0.67243500 | 5.19962700  |
| H | 4.81420600  | 2.44522500  | 2.38535200  |
| H | 4.75744900  | 1.59905500  | 4.73332300  |
| C | 2.82663100  | 2.51650800  | -2.19356200 |
| C | 3.88944700  | 3.40032100  | -2.38054400 |
| C | 2.82840900  | 1.29917500  | -2.89037800 |
| C | 4.93061600  | 3.08036700  | -3.25535000 |
| H | 3.91211200  | 4.34848200  | -1.83378000 |
| C | 3.86512900  | 0.98274600  | -3.75987300 |
| H | 1.99734600  | 0.59351800  | -2.73640500 |
| C | 4.92268600  | 1.87450500  | -3.94788400 |
| H | 5.75732600  | 3.78421600  | -3.39032000 |
| H | 3.84974200  | 0.02624100  | -4.29488700 |
| H | 5.73982800  | 1.62505100  | -4.63084300 |
| C | -3.67473200 | 1.16349000  | -0.42432100 |
| C | -3.65722400 | 2.43859800  | 0.14125700  |
| C | -4.42764500 | 0.16247500  | 0.20660100  |
| C | -4.36275000 | 2.70929900  | 1.31595700  |
| H | -3.09025400 | 3.23776600  | -0.34915600 |
| C | -5.14116200 | 0.43182800  | 1.36853900  |
| H | -4.46359600 | -0.84109800 | -0.23567900 |
| C | -5.11021400 | 1.70964800  | 1.93052900  |
| H | -4.32617900 | 3.71415400  | 1.74857700  |
| H | -5.71451700 | -0.36887600 | 1.84665500  |
| H | -5.66605200 | 1.92133800  | 2.84895900  |

---

|    |             |             |             |
|----|-------------|-------------|-------------|
| C  | -1.03820600 | 4.89410200  | 2.79924400  |
| C  | -0.69758700 | 4.44343700  | 4.05956800  |
| C  | -0.27459200 | 3.09756100  | 4.24715000  |
| C  | -0.23034400 | 2.29467700  | 3.10646200  |
| C  | -0.59543100 | 2.74725200  | 1.80395500  |
| C  | -0.99529700 | 4.05626000  | 1.65337000  |
| H  | 0.09459300  | 3.06422600  | 6.39818100  |
| H  | -1.34687600 | 5.93575400  | 2.66946700  |
| H  | -0.74554400 | 5.11971100  | 4.91945500  |
| C  | 0.11199100  | 2.48092300  | 5.47159700  |
| C  | 0.18702900  | 0.93108700  | 3.11616200  |
| H  | -1.25839700 | 4.46732800  | 0.67342200  |
| C  | 0.54267200  | 0.35883600  | 4.31510800  |
| C  | 0.50085600  | 1.15690800  | 5.49012500  |
| H  | 0.84122200  | -0.69138500 | 4.38028900  |
| H  | 0.78454400  | 0.69626900  | 6.44127600  |
| C  | -0.38677900 | 1.57649600  | 0.96289100  |
| C  | 0.07351400  | 0.52809700  | 1.72148900  |
| C  | 0.06040300  | -3.49445700 | -2.50691600 |
| C  | -0.79974000 | -2.60940800 | -3.21080600 |
| C  | -0.21642900 | -1.57982600 | -3.99596300 |
| C  | 1.17363700  | -1.58783200 | -4.23085200 |
| C  | 1.98712300  | -2.58418600 | -3.69275900 |
| C  | 1.42828100  | -3.50629600 | -2.80135200 |
| H  | -0.35126200 | -4.26242300 | -1.84382100 |
| H  | -1.88414300 | -2.77026600 | -3.18426700 |
| H  | 1.61113400  | -0.82772700 | -4.88674400 |
| H  | 3.05286600  | -2.63867600 | -3.92909900 |
| Cl | 2.45842300  | -4.71097100 | -2.07138400 |
| C  | 1.17209400  | -6.11245000 | 1.56743700  |

---

|   |             |             |             |
|---|-------------|-------------|-------------|
| H | 2.00995000  | -6.36084800 | 2.23919500  |
| H | 0.28018500  | -6.65259100 | 1.91788600  |
| H | 1.43707900  | -6.50644000 | 0.57093200  |
| H | -0.84746700 | -0.87596500 | -4.54954400 |
| C | -4.05790700 | 0.58157200  | -2.80806900 |
| C | -5.19505500 | 1.38954300  | -2.91673500 |
| C | -3.88964200 | -0.45519000 | -3.72885800 |
| C | -6.12847600 | 1.17360900  | -3.92726000 |
| H | -5.35013500 | 2.19993000  | -2.19566300 |
| C | -4.82373300 | -0.67907400 | -4.73834000 |
| H | -3.00431000 | -1.09372700 | -3.64764600 |
| C | -5.94653300 | 0.13807800  | -4.84261800 |
| H | -7.01041800 | 1.81736600  | -3.99706000 |
| H | -4.67275700 | -1.49947000 | -5.44626200 |
| H | -6.68308100 | -0.03482200 | -5.63264700 |
| C | 1.82918900  | 4.01021100  | -0.37248700 |
| C | 1.52335800  | 5.30103600  | -0.81608800 |
| C | 2.31345600  | 3.85739900  | 0.93028600  |
| C | 1.70632300  | 6.40368300  | 0.01749400  |
| H | 1.13015200  | 5.45326600  | -1.82599300 |
| C | 2.49679700  | 4.95455400  | 1.76707400  |
| H | 2.52873000  | 2.85072200  | 1.30400600  |
| C | 2.19504700  | 6.23583900  | 1.31166400  |
| H | 1.46209000  | 7.40496400  | -0.35021800 |
| H | 2.86364900  | 4.79976700  | 2.78709200  |
| H | 2.33308800  | 7.10207800  | 1.96537900  |
| C | 4.15721800  | -2.09903300 | -0.03522000 |
| C | 5.08454200  | -2.87466300 | 0.67023600  |
| C | 4.37581700  | -1.87344500 | -1.39508500 |
| C | 6.17572500  | -3.44398700 | 0.02012000  |

---

|               |             |             |             |
|---------------|-------------|-------------|-------------|
| H             | 4.95699300  | -3.02523700 | 1.74827900  |
| C             | 5.47751600  | -2.42496000 | -2.04524600 |
| H             | 3.66170700  | -1.25410400 | -1.94975300 |
| C             | 6.37532000  | -3.22261100 | -1.34222600 |
| H             | 6.88600900  | -4.05487300 | 0.58534700  |
| H             | 5.63560200  | -2.22904200 | -3.11118800 |
| H             | 7.23855900  | -3.66227700 | -1.85023700 |
| C             | -2.18827000 | -1.75349800 | 3.21460200  |
| C             | -1.95567600 | -2.65173000 | 4.26155300  |
| C             | -2.68398000 | -0.48348400 | 3.52664200  |
| C             | -2.22413500 | -2.29171800 | 5.58117400  |
| H             | -1.55289000 | -3.64685300 | 4.04435000  |
| C             | -2.95622200 | -0.12047400 | 4.84279600  |
| H             | -2.84738900 | 0.23994200  | 2.72020000  |
| C             | -2.72749800 | -1.02546300 | 5.87656200  |
| H             | -2.03676300 | -3.00840000 | 6.38663000  |
| H             | -3.33485500 | 0.88430800  | 5.05744900  |
| H             | -2.93437800 | -0.74384700 | 6.91333800  |
| <b>TS3-L4</b> |             |             |             |
| C             | 0.28888400  | 0.21682400  | 0.29359100  |
| N             | -0.06112400 | -1.05323600 | -0.13363500 |
| N             | -0.01534200 | 1.02322200  | -0.78214200 |
| C             | 0.11233400  | -2.19416200 | 0.70241000  |
| C             | 0.51944200  | -4.31837000 | 2.45706100  |
| C             | -0.90210400 | -2.52476400 | 1.61367300  |
| C             | 1.30018000  | -2.93313200 | 0.60769000  |
| C             | 1.48689600  | -3.98697600 | 1.50438700  |
| C             | -0.67286700 | -3.58717200 | 2.48703900  |
| H             | 2.42427900  | -4.55575000 | 1.46759400  |
| H             | -1.44386100 | -3.84612500 | 3.22333800  |



---

|    |             |             |             |
|----|-------------|-------------|-------------|
| C  | -0.06475200 | 2.45084000  | -0.84207500 |
| C  | -0.25888200 | 5.18165500  | -1.39077600 |
| C  | -1.32898900 | 3.06483900  | -0.83070800 |
| C  | 1.11191800  | 3.19856900  | -0.99607100 |
| C  | 0.98714100  | 4.55901100  | -1.28186200 |
| C  | -1.40232000 | 4.42630200  | -1.12419400 |
| H  | 1.89543100  | 5.15922800  | -1.40669600 |
| H  | -2.38057800 | 4.91913300  | -1.13170500 |
| C  | 2.45911700  | 2.54856800  | -0.74046000 |
| H  | 2.29082700  | 1.89027400  | 0.13550000  |
| C  | -2.54818800 | 2.29943900  | -0.34603100 |
| H  | -2.36378200 | 1.23038000  | -0.55594300 |
| C  | 2.31181600  | -2.59790500 | -0.47369900 |
| H  | 2.21561100  | -1.51335000 | -0.66835000 |
| C  | -2.22312800 | -1.77473800 | 1.57495800  |
| H  | -1.98490200 | -0.72560500 | 1.31582300  |
| C  | 0.76302600  | -5.41576400 | 3.44703100  |
| H  | -0.16975100 | -5.93467300 | 3.71693900  |
| Ni | 1.14363400  | 0.58100800  | 1.93293100  |
| H  | 1.47542400  | -6.16165200 | 3.06314900  |
| H  | 1.18922300  | -5.01502900 | 4.38348400  |
| C  | 3.74850000  | -2.77683200 | -0.01993700 |
| C  | 4.20359200  | -1.92075900 | 0.99041300  |
| C  | 4.64267600  | -3.69280300 | -0.57426900 |
| C  | 5.51774400  | -1.96973700 | 1.43635000  |
| H  | 3.50623000  | -1.18638800 | 1.40913200  |
| C  | 5.96437400  | -3.74922500 | -0.12339000 |
| H  | 4.31558500  | -4.36035500 | -1.37769800 |
| C  | 6.40707300  | -2.89018400 | 0.87769300  |
| H  | 5.84589800  | -1.27761000 | 2.21820600  |

---

|   |             |             |             |
|---|-------------|-------------|-------------|
| H | 6.65521600  | -4.47129700 | -0.56929400 |
| H | 7.44483100  | -2.93325100 | 1.22109100  |
| C | -3.11659400 | -2.30659000 | 0.46912700  |
| C | -3.30986600 | -3.67854200 | 0.27494400  |
| C | -3.79884900 | -1.41863500 | -0.36757900 |
| C | -4.16631900 | -4.14498100 | -0.72039100 |
| H | -2.77967100 | -4.39325800 | 0.91468800  |
| C | -4.64670200 | -1.87893300 | -1.37233600 |
| H | -3.65827400 | -0.34079000 | -0.23028800 |
| C | -4.83539800 | -3.24709100 | -1.55053700 |
| H | -4.30743700 | -5.22226700 | -0.85234700 |
| H | -5.15851100 | -1.15865800 | -2.01906200 |
| H | -5.49834500 | -3.61430300 | -2.33943300 |
| C | -1.87652600 | 1.07334100  | -5.32933600 |
| C | -2.25835400 | -0.21731400 | -5.64152100 |
| C | -2.03401300 | -1.27714100 | -4.71739200 |
| C | -1.42691400 | -0.92951700 | -3.51055000 |
| C | -1.03809600 | 0.40256700  | -3.17742600 |
| C | -1.25905300 | 1.40758000  | -4.09392700 |
| H | -2.84650200 | -2.98249400 | -5.81291600 |
| H | -2.05890100 | 1.87282800  | -6.05333600 |
| H | -2.73576500 | -0.43237300 | -6.60327800 |
| C | -2.36948100 | -2.65191600 | -4.88440600 |
| C | -1.14909400 | -1.85985100 | -2.46444500 |
| H | -0.99128100 | 2.44760400  | -3.87786800 |
| C | -1.48379200 | -3.17952200 | -2.65415300 |
| C | -2.09523100 | -3.55787100 | -3.88090300 |
| H | -1.28863200 | -3.93540100 | -1.88748300 |
| H | -2.35781300 | -4.61064700 | -4.02441000 |
| C | -0.50399100 | 0.27098000  | -1.83271700 |

---

|    |             |             |             |
|----|-------------|-------------|-------------|
| C  | -0.55226600 | -1.03310500 | -1.42172800 |
| C  | 1.38329000  | 1.77936900  | 4.49560800  |
| C  | 0.66466600  | 1.43815200  | 5.63053200  |
| C  | 0.41146200  | 0.09235600  | 5.93990300  |
| C  | 0.84200000  | -0.91682000 | 5.08593400  |
| C  | 1.55888300  | -0.60821900 | 3.92383100  |
| C  | 1.81416200  | 0.75001600  | 3.63477500  |
| H  | 1.61831900  | 2.82110800  | 4.25363100  |
| H  | 0.30338100  | 2.22784600  | 6.29764900  |
| H  | 0.63047500  | -1.96494100 | 5.32503400  |
| H  | 1.99734400  | -1.40785000 | 3.31654100  |
| Cl | 3.35393500  | 1.15541700  | 2.52878900  |
| C  | 1.98309400  | -3.28468000 | -1.78499000 |
| C  | 1.96670700  | -2.53672900 | -2.96588300 |
| C  | 1.71207200  | -4.65492400 | -1.85949600 |
| C  | 1.70388500  | -3.13868800 | -4.19349300 |
| H  | 2.14959700  | -1.45800400 | -2.91737800 |
| C  | 1.44809500  | -5.26173100 | -3.08630700 |
| H  | 1.70639300  | -5.25562000 | -0.94263600 |
| C  | 1.44492500  | -4.50560600 | -4.25809900 |
| H  | 1.68790000  | -2.52686100 | -5.10159400 |
| H  | 1.24167800  | -6.33571900 | -3.12685100 |
| H  | 1.23179100  | -4.98212800 | -5.21965200 |
| C  | -2.90383200 | -1.70105000 | 2.92870500  |
| C  | -4.11653100 | -2.32923900 | 3.21834100  |
| C  | -2.28235500 | -0.94128800 | 3.92711400  |
| C  | -4.69064400 | -2.21514500 | 4.48596400  |
| H  | -4.62836500 | -2.91060100 | 2.44521100  |
| C  | -2.84995100 | -0.83495500 | 5.19157500  |
| H  | -1.34103300 | -0.42443100 | 3.69313200  |

---

|   |             |             |             |
|---|-------------|-------------|-------------|
| C | -4.05786000 | -1.47207100 | 5.47762200  |
| H | -5.64187400 | -2.71380400 | 4.69529600  |
| H | -2.34713800 | -0.23374100 | 5.95569500  |
| H | -4.50608500 | -1.38399100 | 6.47181700  |
| H | -0.12035600 | -0.16278700 | 6.86130500  |
| C | 2.97605500  | 1.64720800  | -1.83597800 |
| C | 2.61465200  | 1.78336900  | -3.17684000 |
| C | 3.92361800  | 0.67441800  | -1.48786400 |
| C | 3.20364700  | 0.97761300  | -4.15438800 |
| H | 1.87289700  | 2.53784300  | -3.46347400 |
| C | 4.51884300  | -0.12282800 | -2.45908100 |
| H | 4.20454000  | 0.56080200  | -0.43236600 |
| C | 4.16344800  | 0.03258500  | -3.80071600 |
| H | 2.91123500  | 1.09710600  | -5.20224800 |
| H | 5.25372100  | -0.87911400 | -2.16167800 |
| H | 4.62407400  | -0.59771100 | -4.56753300 |
| C | 3.48445700  | 3.57458700  | -0.29518900 |
| C | 4.53608000  | 3.99960200  | -1.10871400 |
| C | 3.33718000  | 4.15615100  | 0.97072000  |
| C | 5.41843400  | 4.98803900  | -0.66955800 |
| H | 4.67188400  | 3.55130000  | -2.09874200 |
| C | 4.21434200  | 5.14002600  | 1.41034000  |
| H | 2.51503300  | 3.81592200  | 1.61269800  |
| C | 5.26062100  | 5.56136100  | 0.58822700  |
| H | 6.23810600  | 5.30895900  | -1.31944100 |
| H | 4.08661800  | 5.57914300  | 2.40427900  |
| H | 5.95467100  | 6.33352400  | 0.93296200  |
| C | -3.81741100 | 2.64525900  | -1.09952900 |
| C | -4.63185200 | 3.72176600  | -0.73077800 |
| C | -4.18753800 | 1.88126200  | -2.21188200 |

---

|   |             |            |             |
|---|-------------|------------|-------------|
| C | -5.76981300 | 4.03942700 | -1.46876900 |
| H | -4.37668400 | 4.30905200 | 0.15877900  |
| C | -5.32570300 | 2.19571400 | -2.95145700 |
| H | -3.57296500 | 1.02072000 | -2.50373800 |
| C | -6.11895700 | 3.28015900 | -2.58441800 |
| H | -6.39422700 | 4.88487000 | -1.16478600 |
| H | -5.59226500 | 1.58347700 | -3.81886000 |
| H | -7.01486000 | 3.52880900 | -3.16068300 |
| C | -2.69884000 | 2.39752100 | 1.16986000  |
| C | -1.77210400 | 3.04983100 | 1.98819900  |
| C | -3.79221100 | 1.76471000 | 1.78103900  |
| C | -1.94218400 | 3.08101500 | 3.37345600  |
| H | -0.89907100 | 3.54428700 | 1.54949000  |
| C | -3.95900500 | 1.79039900 | 3.16053300  |
| H | -4.53446300 | 1.24910300 | 1.16023700  |
| C | -3.03356800 | 2.45622900 | 3.96439400  |
| H | -1.20224800 | 3.59685500 | 3.99295700  |
| H | -4.81147200 | 1.27450200 | 3.61387700  |
| H | -3.16055500 | 2.47452800 | 5.05134600  |
| C | -0.35986300 | 6.62896600 | -1.76049600 |
| H | 0.50031100  | 7.20394400 | -1.38443800 |
| H | -0.37809900 | 6.75799800 | -2.85662700 |
| H | -1.28021800 | 7.08650900 | -1.36686700 |

**INT4-L4**

|   |             |             |             |
|---|-------------|-------------|-------------|
| C | -0.01744800 | -0.04471500 | -0.43021700 |
| N | 0.37081300  | -0.54685600 | 0.78497500  |
| N | -0.65317700 | 1.12661900  | -0.14042000 |
| C | 0.96268600  | -1.84252200 | 0.88339500  |
| C | 2.07310300  | -4.39180600 | 0.95447400  |
| C | 2.35433600  | -1.97831200 | 0.73395400  |

---

|    |             |             |             |
|----|-------------|-------------|-------------|
| C  | 0.11567200  | -2.94341400 | 1.08444400  |
| C  | 0.69412000  | -4.21329000 | 1.08841600  |
| C  | 2.88523800  | -3.26609000 | 0.78546300  |
| H  | 0.04518300  | -5.09350500 | 1.17204200  |
| H  | 3.96530900  | -3.40065900 | 0.65672700  |
| C  | -1.16114000 | 2.09043300  | -1.07433200 |
| C  | -2.14312300 | 4.09629600  | -2.73506900 |
| C  | -0.35882900 | 3.21023900  | -1.34012800 |
| C  | -2.43798400 | 1.92391200  | -1.64589800 |
| C  | -2.89467800 | 2.94556600  | -2.47692700 |
| C  | -0.87864400 | 4.21117400  | -2.16287400 |
| H  | -3.87450700 | 2.84463700  | -2.95416000 |
| H  | -0.27359100 | 5.09901300  | -2.37455400 |
| C  | -3.26294800 | 0.66395800  | -1.41114300 |
| H  | -2.57288300 | -0.18392600 | -1.58755000 |
| C  | 1.07687000  | 3.26831200  | -0.84276500 |
| H  | 1.11330500  | 2.69974400  | 0.10438000  |
| C  | -1.37345900 | -2.74125000 | 1.30161900  |
| H  | -1.60882100 | -1.70476300 | 1.00546800  |
| C  | 3.22709800  | -0.73955600 | 0.58664700  |
| H  | 2.68816900  | -0.04353300 | -0.08708200 |
| Ni | 0.50702500  | -1.10399900 | -2.02935000 |
| C  | -2.21370600 | -3.57875700 | 0.35342500  |
| C  | -2.04404600 | -3.35201000 | -1.02045800 |
| C  | -3.19347100 | -4.48063900 | 0.76631300  |
| C  | -2.82676800 | -4.01024000 | -1.95966200 |
| H  | -1.29319000 | -2.62537400 | -1.36402400 |
| C  | -3.98401400 | -5.14344000 | -0.17668700 |
| H  | -3.35835900 | -4.65680200 | 1.83434400  |
| C  | -3.80542100 | -4.91244600 | -1.53712900 |

---

|   |             |             |             |
|---|-------------|-------------|-------------|
| H | -2.66900400 | -3.80542800 | -3.02313600 |
| H | -4.75240900 | -5.84484100 | 0.16228500  |
| H | -4.43037600 | -5.43079500 | -2.26992900 |
| C | 3.35855600  | -0.03544100 | 1.92526100  |
| C | 3.77602500  | -0.72909900 | 3.06683000  |
| C | 3.06827800  | 1.32618400  | 2.04691000  |
| C | 3.90967100  | -0.07569800 | 4.28952700  |
| H | 4.00341400  | -1.79904900 | 2.99291300  |
| C | 3.18974700  | 1.98275100  | 3.27046600  |
| H | 2.73530300  | 1.87975500  | 1.16225900  |
| C | 3.61390200  | 1.28294000  | 4.39658200  |
| H | 4.24320300  | -0.63454200 | 5.16937500  |
| H | 2.94605200  | 3.04771700  | 3.33946500  |
| H | 3.70696200  | 1.79281200  | 5.35993400  |
| C | -1.77621200 | 4.18994200  | 3.55937600  |
| C | -1.38318100 | 3.58411100  | 4.73754200  |
| C | -0.76104700 | 2.30460800  | 4.71379700  |
| C | -0.58631900 | 1.72293800  | 3.45714200  |
| C | -1.01409500 | 2.32888900  | 2.23774500  |
| C | -1.60118000 | 3.57448100  | 2.29077200  |
| H | -0.40509000 | 1.95966400  | 6.83958300  |
| H | -2.24251400 | 5.17864900  | 3.59801000  |
| H | -1.54178500 | 4.08989700  | 5.69559900  |
| C | -0.29101900 | 1.55300400  | 5.82938500  |
| C | 0.03972100  | 0.45809200  | 3.25426100  |
| H | -1.92346900 | 4.09532200  | 1.38239100  |
| C | 0.47404400  | -0.25087500 | 4.34903200  |
| C | 0.29831400  | 0.31960400  | 5.63903300  |
| H | 0.93431500  | -1.23890200 | 4.24724000  |
| H | 0.64370600  | -0.24721900 | 6.50870400  |

---

|    |             |             |             |
|----|-------------|-------------|-------------|
| C  | -0.64395600 | 1.35091700  | 1.22465200  |
| C  | -0.01014000 | 0.28659600  | 1.81034800  |
| C  | 2.05380300  | -2.15405200 | -4.30490600 |
| C  | 2.94739200  | -3.12795200 | -4.74642300 |
| C  | 3.10417200  | -4.31780000 | -4.03073700 |
| C  | 2.35058600  | -4.53495000 | -2.88029000 |
| C  | 1.45382100  | -3.55704900 | -2.43891300 |
| C  | 1.32781500  | -2.34224800 | -3.12355000 |
| H  | 1.92204300  | -1.23293400 | -4.88085100 |
| H  | 3.52367300  | -2.96313500 | -5.66327900 |
| H  | 2.44325900  | -5.47771800 | -2.32983400 |
| H  | 0.85770900  | -3.76215500 | -1.53805400 |
| Cl | -0.73737000 | -0.43806800 | -3.64216700 |
| C  | -1.73091700 | -2.81508700 | 2.77566100  |
| C  | -2.35867800 | -1.71906500 | 3.37495800  |
| C  | -1.42750900 | -3.92162100 | 3.57850100  |
| C  | -2.68537100 | -1.72307600 | 4.72886700  |
| H  | -2.58767500 | -0.83619900 | 2.76934900  |
| C  | -1.74663500 | -3.92894900 | 4.93435800  |
| H  | -0.92972500 | -4.79343900 | 3.14242200  |
| C  | -2.37672700 | -2.82870200 | 5.51584200  |
| H  | -3.16854600 | -0.84343600 | 5.16743500  |
| H  | -1.50013000 | -4.80405800 | 5.54311800  |
| H  | -2.62392100 | -2.83617200 | 6.58152900  |
| C  | 4.55064500  | -1.01400000 | -0.10819100 |
| C  | 5.79177000  | -0.74358900 | 0.47092900  |
| C  | 4.51913000  | -1.51833600 | -1.41573300 |
| C  | 6.97348100  | -0.98328200 | -0.23424400 |
| H  | 5.84559200  | -0.33150400 | 1.48296400  |
| C  | 5.69362400  | -1.76484500 | -2.11584200 |



---

|   |             |             |             |
|---|-------------|-------------|-------------|
| H | 3.55377100  | -1.71520700 | -1.89807500 |
| C | 6.93007100  | -1.49718300 | -1.52605600 |
| H | 7.93608400  | -0.76298500 | 0.23702900  |
| H | 5.63432100  | -2.16179600 | -3.13434400 |
| H | 7.85677800  | -1.68720300 | -2.07555500 |
| H | 3.80094300  | -5.08407200 | -4.38438700 |
| C | -3.82821800 | 0.50879500  | -0.01034300 |
| C | -3.99252600 | 1.57627800  | 0.87217600  |
| C | -4.32197400 | -0.74999200 | 0.36462100  |
| C | -4.63099800 | 1.39777100  | 2.10230300  |
| H | -3.63416200 | 2.57148500  | 0.58741400  |
| C | -4.97710700 | -0.92610400 | 1.57725700  |
| H | -4.20931700 | -1.59694800 | -0.32519800 |
| C | -5.13639800 | 0.15027400  | 2.45300300  |
| H | -4.73929900 | 2.24921200  | 2.78234000  |
| H | -5.35496300 | -1.91732500 | 1.84788700  |
| H | -5.64763600 | 0.00984200  | 3.41027100  |
| C | -4.39893800 | 0.50100800  | -2.41265000 |
| C | -5.63315500 | 1.13123300  | -2.21005100 |
| C | -4.22798800 | -0.28198300 | -3.55724400 |
| C | -6.66379000 | 0.99768200  | -3.13556500 |
| H | -5.79006300 | 1.73407500  | -1.30816400 |
| C | -5.26286600 | -0.42274300 | -4.48116600 |
| H | -3.26556600 | -0.77662700 | -3.72417000 |
| C | -6.48171300 | 0.21812900  | -4.27718800 |
| H | -7.62000100 | 1.49989900  | -2.95990300 |
| H | -5.11092700 | -1.04243300 | -5.37006900 |
| H | -7.29288500 | 0.10640100  | -5.00287600 |
| C | 1.53441300  | 4.66686900  | -0.48032200 |
| C | 2.09243500  | 5.53090500  | -1.42861300 |

---

|                |             |             |             |
|----------------|-------------|-------------|-------------|
| C              | 1.39350200  | 5.12016800  | 0.83544200  |
| C              | 2.47818200  | 6.82128300  | -1.07464400 |
| H              | 2.23788000  | 5.17805700  | -2.45601100 |
| C              | 1.78130800  | 6.40991800  | 1.19326500  |
| H              | 0.97472500  | 4.44483800  | 1.59274900  |
| C              | 2.32137000  | 7.26652900  | 0.23701600  |
| H              | 2.91284800  | 7.48355600  | -1.82925700 |
| H              | 1.66516400  | 6.74413000  | 2.22864200  |
| H              | 2.62985400  | 8.27848400  | 0.51509300  |
| C              | 2.03655300  | 2.56137300  | -1.79216400 |
| C              | 1.61978100  | 1.98906200  | -2.99401600 |
| C              | 3.38980600  | 2.45235600  | -1.43393000 |
| C              | 2.53104600  | 1.32738900  | -3.81818700 |
| H              | 0.57003700  | 2.02911200  | -3.29814900 |
| C              | 4.29476300  | 1.77915500  | -2.24703600 |
| H              | 3.74196400  | 2.91884600  | -0.50605900 |
| C              | 3.86550100  | 1.21290900  | -3.44894700 |
| H              | 2.17170500  | 0.89476900  | -4.75632900 |
| H              | 5.34265200  | 1.69304000  | -1.94195200 |
| H              | 4.57349700  | 0.67680600  | -4.08887800 |
| C              | 2.67140800  | -5.76353500 | 0.99957900  |
| H              | 2.88400200  | -6.06917700 | 2.03873700  |
| H              | 1.98833300  | -6.51668700 | 0.57695800  |
| H              | 3.62216500  | -5.80929400 | 0.44722200  |
| C              | -2.68869500 | 5.15859700  | -3.63804400 |
| H              | -2.76095100 | 4.79432900  | -4.67668200 |
| H              | -3.70608600 | 5.45733900  | -3.33779300 |
| H              | -2.05528300 | 6.05788800  | -3.64265700 |
| <b>INT5-L4</b> |             |             |             |
| C              | 0.16985700  | 0.01113300  | -0.06346200 |

---

|    |             |             |             |
|----|-------------|-------------|-------------|
| N  | -0.70581800 | -0.38767400 | 0.93254300  |
| N  | -0.64296000 | 0.51976600  | -1.06153200 |
| C  | -0.31505400 | -1.14576600 | 2.09404000  |
| C  | 0.67415000  | -2.69278300 | 4.21398900  |
| C  | 0.36038100  | -0.50475000 | 3.15920800  |
| C  | -0.58400100 | -2.53145200 | 2.13166800  |
| C  | -0.06978400 | -3.27782900 | 3.19550100  |
| C  | 0.85387000  | -1.30853200 | 4.18795000  |
| H  | -0.23497800 | -4.36205300 | 3.20364700  |
| H  | 1.42498500  | -0.84142400 | 4.99555300  |
| C  | -0.29034000 | 1.28050200  | -2.23464100 |
| C  | 0.00658000  | 2.69765400  | -4.64300300 |
| C  | -0.49888000 | 2.67757300  | -2.24721200 |
| C  | 0.10351400  | 0.60054800  | -3.40329300 |
| C  | 0.21835500  | 1.32078800  | -4.59151500 |
| C  | -0.32751600 | 3.35118800  | -3.46066800 |
| H  | 0.49969000  | 0.79031600  | -5.50778800 |
| H  | -0.44927600 | 4.44023600  | -3.47602100 |
| C  | 0.37806800  | -0.89000500 | -3.36566000 |
| H  | 0.92783800  | -1.06550400 | -2.41879400 |
| C  | -0.94441500 | 3.47302100  | -1.02849300 |
| H  | -0.64274900 | 2.88661600  | -0.13915600 |
| C  | -1.45772700 | -3.24077400 | 1.10684600  |
| H  | -1.41285700 | -2.65785200 | 0.16675600  |
| C  | 0.57202300  | 1.00078700  | 3.16957600  |
| H  | 1.04385200  | 1.26456200  | 2.20507600  |
| C  | 1.29633800  | -3.51820600 | 5.29698300  |
| H  | 0.81336300  | -4.50303700 | 5.39021700  |
| Ni | 2.07609900  | 0.05298200  | -0.11606400 |
| H  | 2.36503600  | -3.69612700 | 5.08525900  |

---

|   |             |             |             |
|---|-------------|-------------|-------------|
| H | 1.24653900  | -3.01149000 | 6.27390900  |
| C | -0.97750600 | -4.64539900 | 0.73506300  |
| C | 0.26850300  | -4.79301700 | 0.11549700  |
| C | -1.76071600 | -5.79179900 | 0.92328300  |
| C | 0.70402200  | -6.03748900 | -0.33022400 |
| H | 0.90681200  | -3.91375900 | -0.02337600 |
| C | -1.31911900 | -7.04148400 | 0.48778000  |
| H | -2.74139600 | -5.71893400 | 1.40199200  |
| C | -0.08960200 | -7.16905200 | -0.15005400 |
| H | 1.67967100  | -6.10859100 | -0.81944300 |
| H | -1.95286800 | -7.92016200 | 0.64515900  |
| H | 0.25297400  | -8.14676100 | -0.50302300 |
| C | -0.69517100 | 1.83038000  | 3.26630300  |
| C | -1.84659600 | 1.39339300  | 3.92287200  |
| C | -0.64482300 | 3.15506400  | 2.80521800  |
| C | -2.92221500 | 2.25983700  | 4.12988800  |
| H | -1.89271300 | 0.36197700  | 4.29472400  |
| C | -1.70714300 | 4.02348500  | 3.02865900  |
| H | 0.25334500  | 3.49168000  | 2.27103800  |
| C | -2.85155900 | 3.58010800  | 3.69518600  |
| H | -3.82006200 | 1.89716600  | 4.64218600  |
| H | -1.64739900 | 5.05298000  | 2.65932100  |
| H | -3.69045800 | 4.26259500  | 3.86437800  |
| C | -5.31463500 | 0.94737200  | -2.52087900 |
| C | -6.12433500 | 0.62830100  | -1.45014900 |
| C | -5.54801000 | 0.25062900  | -0.20447200 |
| C | -4.15532900 | 0.18318200  | -0.15859200 |
| C | -3.31351200 | 0.53705200  | -1.25193100 |
| C | -3.89598800 | 0.92666000  | -2.43560100 |
| H | -7.33098400 | 0.02135900  | 1.03430200  |

---

|   |             |             |             |
|---|-------------|-------------|-------------|
| H | -5.77435800 | 1.25292300  | -3.46598700 |
| H | -7.21431400 | 0.68115900  | -1.54612500 |
| C | -6.23666600 | -0.02170300 | 1.00990900  |
| C | -3.41025000 | -0.18387300 | 1.00172000  |
| H | -3.29034900 | 1.23647000  | -3.29370200 |
| C | -4.10537800 | -0.40756200 | 2.16834900  |
| C | -5.52292800 | -0.31991300 | 2.15328000  |
| H | -3.59192500 | -0.66868000 | 3.09707100  |
| H | -6.06190800 | -0.51852900 | 3.08512800  |
| C | -1.97187400 | 0.37115800  | -0.71523500 |
| C | -2.01926400 | -0.13223500 | 0.55428200  |
| C | 2.71507900  | -2.42675700 | 1.09060700  |
| C | 3.32337900  | -3.67696000 | 1.19760800  |
| C | 3.68603100  | -4.38764400 | 0.05456200  |
| C | 3.39716100  | -3.83606100 | -1.19187300 |
| C | 2.78848900  | -2.58129300 | -1.28622800 |
| C | 2.46079800  | -1.81535900 | -0.15220400 |
| H | 2.46447900  | -1.90266200 | 2.01967000  |
| H | 3.52394300  | -4.09450300 | 2.19152100  |
| H | 3.65606000  | -4.37765400 | -2.10989700 |
| H | 2.62371200  | -2.18769100 | -2.29643800 |
| C | 5.46137100  | 0.13635800  | 2.96842000  |
| C | 4.53151700  | 0.13193400  | 1.94164400  |
| C | 4.90651700  | 0.22510200  | 0.57341000  |
| C | 6.31214900  | 0.32813600  | 0.31293900  |
| C | 7.22290500  | 0.32251700  | 1.36425000  |
| C | 6.82998200  | 0.23215100  | 2.70104600  |
| H | 5.10375300  | 0.06499900  | 4.00347600  |
| H | 3.46369300  | 0.06686700  | 2.17106100  |
| C | 6.76885300  | 0.41703900  | -1.11477300 |

---

|    |             |             |             |
|----|-------------|-------------|-------------|
| H  | 8.29125400  | 0.39063900  | 1.11478900  |
| H  | 7.56917900  | 0.22977300  | 3.50804700  |
| C  | 5.76913500  | -0.29018500 | -2.01061300 |
| C  | 4.36491400  | 0.26410800  | -1.78290900 |
| H  | 6.86226000  | 1.47533200  | -1.43735500 |
| H  | 6.03943900  | -0.20050900 | -3.07969000 |
| N  | 3.96928900  | 0.20563700  | -0.39703400 |
| C  | 4.18535100  | 1.66267800  | -2.37274500 |
| H  | 4.74654300  | 2.41525600  | -1.79247600 |
| H  | 4.52503600  | 1.70468500  | -3.42636100 |
| H  | 3.12390200  | 1.96553900  | -2.32751900 |
| H  | 3.68256500  | -0.40733200 | -2.34112000 |
| H  | 5.75456200  | -1.36882300 | -1.76332400 |
| H  | 7.78038500  | -0.01662300 | -1.22001200 |
| Cl | 1.96281900  | 2.31902200  | 0.29925200  |
| C  | 1.51007800  | 1.52606200  | 4.24830900  |
| C  | 2.72578600  | 2.11201700  | 3.88831800  |
| C  | 1.14845200  | 1.51488100  | 5.60327500  |
| C  | 3.57932900  | 2.63226000  | 4.86217000  |
| H  | 3.00275500  | 2.16616700  | 2.82965400  |
| C  | 1.99834300  | 2.03215200  | 6.57517700  |
| H  | 0.17747900  | 1.10022300  | 5.89913300  |
| C  | 3.22429700  | 2.58857000  | 6.20643500  |
| H  | 4.53478400  | 3.06788400  | 4.55398700  |
| H  | 1.69927100  | 2.00830000  | 7.62819400  |
| H  | 3.89578300  | 2.99558700  | 6.96919900  |
| C  | -2.91923100 | -3.30657800 | 1.52055900  |
| C  | -3.90609600 | -3.25615900 | 0.52963900  |
| C  | -3.31296600 | -3.55362200 | 2.83743900  |
| C  | -5.24402200 | -3.47432300 | 0.83951300  |

---

|   |             |             |             |
|---|-------------|-------------|-------------|
| H | -3.61166500 | -3.03759900 | -0.50363700 |
| C | -4.65423000 | -3.77445800 | 3.15219700  |
| H | -2.55893100 | -3.58557900 | 3.63078200  |
| C | -5.62393400 | -3.74525900 | 2.15374300  |
| H | -5.99795400 | -3.42105100 | 0.04766900  |
| H | -4.94038700 | -3.97530500 | 4.18965300  |
| H | -6.67604300 | -3.91992500 | 2.39967200  |
| H | 4.17636500  | -5.36400200 | 0.13510300  |
| C | -0.23962000 | 4.82338600  | -0.87930000 |
| C | -0.90171200 | 5.92283100  | -0.31793000 |
| C | 1.11101700  | 4.98110700  | -1.22097300 |
| C | -0.24494000 | 7.13589000  | -0.11008600 |
| H | -1.95487400 | 5.83724900  | -0.03229100 |
| C | 1.76535400  | 6.19238100  | -1.02085300 |
| H | 1.66937700  | 4.13099700  | -1.61942500 |
| C | 1.09217000  | 7.27871200  | -0.46496600 |
| H | -0.79138000 | 7.97496500  | 0.33246800  |
| H | 2.82209600  | 6.27917200  | -1.29106500 |
| H | 1.61063900  | 8.22913500  | -0.30427900 |
| C | -2.45420000 | 3.65088300  | -0.98198600 |
| C | -3.15709800 | 4.26414900  | -2.02573600 |
| C | -3.16531300 | 3.27304400  | 0.15695900  |
| C | -4.52559300 | 4.49728700  | -1.92682000 |
| H | -2.62334000 | 4.57659100  | -2.92908700 |
| C | -4.53555400 | 3.50552500  | 0.26427100  |
| H | -2.63396000 | 2.78459100  | 0.97899100  |
| C | -5.22217100 | 4.12035500  | -0.77834000 |
| H | -5.05432700 | 4.98088400  | -2.75465200 |
| H | -5.06309300 | 3.18582300  | 1.17021300  |
| H | -6.29953000 | 4.29863600  | -0.70234000 |

---

|   |             |             |             |
|---|-------------|-------------|-------------|
| C | -0.88348000 | -1.72131400 | -3.29247000 |
| C | -2.01747600 | -1.40664400 | -4.04439200 |
| C | -0.88559100 | -2.89338000 | -2.52937400 |
| C | -3.13620400 | -2.23799000 | -4.02552400 |
| H | -2.02015700 | -0.49770400 | -4.65721600 |
| C | -1.99390700 | -3.73654000 | -2.52205600 |
| H | 0.01220400  | -3.15583000 | -1.95479000 |
| C | -3.12726300 | -3.40597900 | -3.26601400 |
| H | -4.02342800 | -1.96824300 | -4.60749300 |
| H | -1.96919300 | -4.65246700 | -1.91914200 |
| H | -4.00430300 | -4.06082300 | -3.25115800 |
| C | 1.31121000  | -1.36986100 | -4.47165200 |
| C | 1.04008300  | -2.49647500 | -5.25273900 |
| C | 2.52950100  | -0.70529200 | -4.67885400 |
| C | 1.95909100  | -2.95003300 | -6.20131000 |
| H | 0.10056600  | -3.04086900 | -5.11899400 |
| C | 3.44830100  | -1.15705200 | -5.61795400 |
| H | 2.75659300  | 0.18803600  | -4.08992700 |
| C | 3.16731800  | -2.28776400 | -6.38604400 |
| H | 1.72223800  | -3.83743600 | -6.79659500 |
| H | 4.39444700  | -0.62116500 | -5.74473000 |
| H | 3.89001000  | -2.64884400 | -7.12408700 |
| C | 0.18382900  | 3.45436500  | -5.92319300 |
| H | -0.41008000 | 4.38139100  | -5.93459100 |
| H | 1.23912000  | 3.74398400  | -6.06866000 |
| H | -0.10472500 | 2.84729100  | -6.79578600 |

**INT6-L4**

|   |             |             |             |
|---|-------------|-------------|-------------|
| C | 0.01638200  | -0.12439700 | -0.05579400 |
| N | -0.68025200 | -0.22028000 | 1.12283500  |
| N | -0.42542200 | 1.04385400  | -0.63973100 |



---

|    |             |             |             |
|----|-------------|-------------|-------------|
| C  | -0.63567900 | -1.29438300 | 2.07682300  |
| C  | -0.77456300 | -3.21834300 | 4.09617400  |
| C  | 0.28497500  | -1.23699700 | 3.13996000  |
| C  | -1.60247100 | -2.31239100 | 1.98594700  |
| C  | -1.64601800 | -3.26152700 | 3.00826800  |
| C  | 0.17816800  | -2.20018600 | 4.14392000  |
| H  | -2.38325200 | -4.07043100 | 2.95091700  |
| H  | 0.86819600  | -2.16487600 | 4.99390500  |
| C  | -0.02464600 | 1.44760900  | -1.95861000 |
| C  | 0.72963800  | 2.20889500  | -4.54948500 |
| C  | 1.01444700  | 2.38176300  | -2.12923000 |
| C  | -0.70889400 | 0.90990300  | -3.06585700 |
| C  | -0.33186300 | 1.32865200  | -4.34248600 |
| C  | 1.38660300  | 2.72125400  | -3.43040500 |
| H  | -0.88626900 | 0.94799200  | -5.20838500 |
| H  | 2.21948800  | 3.42061700  | -3.57073900 |
| C  | -1.85285300 | -0.07314800 | -2.90831300 |
| H  | -2.05365800 | -0.16239400 | -1.82687100 |
| C  | 1.68795000  | 3.07231200  | -0.95834800 |
| H  | 1.59045000  | 2.40031000  | -0.08212200 |
| C  | -2.61544000 | -2.34088400 | 0.85054400  |
| H  | -2.11677100 | -1.89188700 | -0.03248900 |
| C  | 1.29268200  | -0.10180100 | 3.23544600  |
| H  | 1.54903000  | 0.17857300  | 2.19392000  |
| C  | -0.83166200 | -4.26538400 | 5.16455800  |
| H  | -0.47654700 | -3.88036100 | 6.13268800  |
| Ni | 1.52617400  | -0.96199400 | -0.79380300 |
| H  | -1.85230900 | -4.65489300 | 5.29941800  |
| H  | -0.19093700 | -5.12544600 | 4.90345100  |
| C  | -3.02821900 | -3.74034800 | 0.40625500  |

---

|   |             |             |             |
|---|-------------|-------------|-------------|
| C | -2.07791900 | -4.76556600 | 0.33001700  |
| C | -4.33082600 | -4.01521700 | -0.02676400 |
| C | -2.41915500 | -6.02479200 | -0.15342800 |
| H | -1.04771300 | -4.57753600 | 0.64667200  |
| C | -4.67266500 | -5.27476500 | -0.51931400 |
| H | -5.09742100 | -3.23538200 | 0.01594900  |
| C | -3.71947400 | -6.28741900 | -0.58176400 |
| H | -1.65187200 | -6.80438900 | -0.19797000 |
| H | -5.69851100 | -5.46330800 | -0.84994600 |
| H | -3.98898200 | -7.27825700 | -0.95933400 |
| C | 0.62250200  | 1.11311200  | 3.85651500  |
| C | 0.13171400  | 1.06762000  | 5.16627200  |
| C | 0.47483600  | 2.29629700  | 3.13295900  |
| C | -0.49369600 | 2.17466000  | 5.73125300  |
| H | 0.24766900  | 0.14984600  | 5.75340800  |
| C | -0.16276800 | 3.40548800  | 3.68904300  |
| H | 0.84994200  | 2.34190100  | 2.10313400  |
| C | -0.64865400 | 3.34724000  | 4.99128600  |
| H | -0.86755800 | 2.12132100  | 6.75827200  |
| H | -0.29365100 | 4.31127800  | 3.08783600  |
| H | -1.15525200 | 4.21249400  | 5.42870300  |
| C | -3.46858900 | 4.88338400  | 0.04950700  |
| C | -4.06474800 | 4.72123700  | 1.28504600  |
| C | -3.77012200 | 3.57776800  | 2.07776300  |
| C | -2.85731700 | 2.66758700  | 1.54220600  |
| C | -2.21930700 | 2.83803900  | 0.27752400  |
| C | -2.54134700 | 3.94546800  | -0.47688800 |
| H | -5.02273200 | 3.93857100  | 3.82811800  |
| H | -3.70725700 | 5.76782600  | -0.54897500 |
| H | -4.77111500 | 5.46988900  | 1.65859100  |

---

|   |             |             |             |
|---|-------------|-------------|-------------|
| C | -4.30627500 | 3.25711000  | 3.35763200  |
| C | -2.46598200 | 1.46490900  | 2.19837500  |
| H | -2.10143000 | 4.11283600  | -1.46446700 |
| C | -3.00375300 | 1.17627600  | 3.43048900  |
| C | -3.92734400 | 2.09554500  | 3.99879300  |
| H | -2.73090000 | 0.26606900  | 3.97467100  |
| H | -4.35036000 | 1.86583200  | 4.98139300  |
| C | -1.36539000 | 1.66228900  | 0.16410600  |
| C | -1.51755300 | 0.86725900  | 1.27105900  |
| C | 2.02126500  | -3.29453800 | 0.73148500  |
| C | 2.08386800  | -4.67438200 | 0.92955200  |
| C | 1.49665700  | -5.54415400 | 0.00850400  |
| C | 0.83127400  | -5.01559100 | -1.09605800 |
| C | 0.73535900  | -3.63284000 | -1.27026600 |
| C | 1.33835200  | -2.75809600 | -0.36298900 |
| H | 2.56721100  | -2.62742800 | 1.40833400  |
| H | 2.62944300  | -5.07351200 | 1.79256900  |
| H | 0.36686500  | -5.68177100 | -1.83283300 |
| H | 0.20243100  | -3.24214800 | -2.14215000 |
| C | 5.55820500  | -0.81644500 | 1.14006600  |
| C | 4.39513400  | -0.76498100 | 0.38877500  |
| C | 4.31556400  | -1.32042700 | -0.91068700 |
| C | 5.47932600  | -1.94617400 | -1.42808500 |
| C | 6.64194100  | -1.98053300 | -0.65577600 |
| C | 6.70328400  | -1.42184300 | 0.61781900  |
| H | 5.57025800  | -0.37269900 | 2.14149400  |
| H | 3.50612100  | -0.26224400 | 0.79370700  |
| C | 5.43288300  | -2.58722900 | -2.78601300 |
| H | 7.52534500  | -2.47814100 | -1.07520200 |
| H | 7.62867600  | -1.46278800 | 1.19926100  |

---

|   |             |             |             |
|---|-------------|-------------|-------------|
| C | 4.00471800  | -2.94666200 | -3.14888600 |
| C | 3.08824700  | -1.74121700 | -2.97725900 |
| H | 5.85283500  | -1.90316300 | -3.55108200 |
| H | 3.93586900  | -3.32981800 | -4.18261300 |
| N | 3.13481900  | -1.20920400 | -1.61769900 |
| H | 3.64206300  | -3.74845300 | -2.47746600 |
| H | 6.08388500  | -3.47891600 | -2.80104500 |
| C | 2.62455900  | -0.43056200 | 3.90570600  |
| C | 3.37348100  | 0.59831500  | 4.49250800  |
| C | 3.19383200  | -1.71018000 | 3.87144700  |
| C | 4.63517200  | 0.35783300  | 5.03123200  |
| H | 2.96378900  | 1.61234100  | 4.52926300  |
| C | 4.45448300  | -1.95420300 | 4.41103500  |
| H | 2.64534900  | -2.54000000 | 3.41836500  |
| C | 5.18169200  | -0.92239300 | 4.99766500  |
| H | 5.19383900  | 1.18285700  | 5.48296400  |
| H | 4.87194000  | -2.96412200 | 4.36342200  |
| H | 6.17099700  | -1.11415700 | 5.42284200  |
| C | -3.81857200 | -1.46958700 | 1.17156500  |
| C | -4.26768000 | -0.50795200 | 0.26437800  |
| C | -4.53495400 | -1.64395800 | 2.36004000  |
| C | -5.38557900 | 0.27814100  | 0.53986500  |
| H | -3.73113500 | -0.36470100 | -0.68053300 |
| C | -5.65864600 | -0.87055000 | 2.63641600  |
| H | -4.20654300 | -2.39965400 | 3.08193600  |
| C | -6.08483200 | 0.09977800  | 1.73015400  |
| H | -5.70454500 | 1.03403200  | -0.18565700 |
| H | -6.20521300 | -1.02307400 | 3.57216100  |
| H | -6.96014300 | 0.71660000  | 1.95361700  |
| H | 1.56906500  | -6.62780500 | 0.14694400  |

---

|   |             |             |             |
|---|-------------|-------------|-------------|
| C | 1.01152500  | 4.38193800  | -0.59012700 |
| C | 0.35673900  | 5.18743500  | -1.52564400 |
| C | 1.13203300  | 4.85782800  | 0.72064100  |
| C | -0.17176200 | 6.42566200  | -1.15981400 |
| H | 0.25361300  | 4.84540900  | -2.56075300 |
| C | 0.59927700  | 6.08863900  | 1.09205700  |
| H | 1.68074500  | 4.25928200  | 1.45734500  |
| C | -0.05951600 | 6.87888000  | 0.15092400  |
| H | -0.67841900 | 7.03965700  | -1.91099800 |
| H | 0.71076100  | 6.43930900  | 2.12302600  |
| H | -0.47639700 | 7.84814400  | 0.43896200  |
| C | 3.18552800  | 3.24706000  | -1.18797400 |
| C | 3.81110100  | 4.49322700  | -1.26917600 |
| C | 3.96340000  | 2.09291700  | -1.32847900 |
| C | 5.18877900  | 4.57810100  | -1.48081000 |
| H | 3.22628000  | 5.41254000  | -1.16210800 |
| C | 5.33681300  | 2.17536500  | -1.52844900 |
| H | 3.47729000  | 1.10994000  | -1.30099400 |
| C | 5.95536000  | 3.42354600  | -1.60657100 |
| H | 5.66453400  | 5.56170500  | -1.54111500 |
| H | 5.92103800  | 1.25223200  | -1.61366700 |
| H | 7.03598000  | 3.49436400  | -1.76162300 |
| C | -1.57451900 | -1.48905100 | -3.38566000 |
| C | -0.53385800 | -1.84712900 | -4.24519300 |
| C | -2.45133300 | -2.49379200 | -2.95104600 |
| C | -0.38982200 | -3.16806100 | -4.67628700 |
| H | 0.19054400  | -1.09720300 | -4.57783500 |
| C | -2.30586200 | -3.81120900 | -3.36980000 |
| H | -3.27193400 | -2.23446000 | -2.26920700 |
| C | -1.27458900 | -4.15165900 | -4.24666300 |

---

|   |             |             |             |
|---|-------------|-------------|-------------|
| H | 0.43886700  | -3.42666000 | -5.34322500 |
| H | -2.99663000 | -4.57483800 | -2.99647700 |
| H | -1.15428200 | -5.18610200 | -4.58138100 |
| C | -3.12253600 | 0.50500600  | -3.51984600 |
| C | -3.59403400 | 0.13517100  | -4.78191300 |
| C | -3.82845800 | 1.47630800  | -2.80134800 |
| C | -4.73419300 | 0.73545700  | -5.31584100 |
| H | -3.06967600 | -0.64010100 | -5.35142800 |
| C | -4.96717900 | 2.07560700  | -3.33036800 |
| H | -3.47531900 | 1.76867600  | -1.80579600 |
| C | -5.42353700 | 1.70754800  | -4.59532200 |
| H | -5.08959300 | 0.43389500  | -6.30567200 |
| H | -5.50003700 | 2.83354500  | -2.74682200 |
| H | -6.31932000 | 2.17315400  | -5.01622300 |
| C | 1.17939600  | 2.56202300  | -5.93190200 |
| H | 0.35378100  | 2.50499500  | -6.65747000 |
| H | 1.61299800  | 3.57264300  | -5.97528200 |
| H | 1.96236800  | 1.86164800  | -6.27287000 |
| H | 2.05193800  | -2.09684200 | -3.14739300 |
| C | 3.35016500  | -0.63296400 | -3.98919300 |
| H | 3.29801600  | -1.01202200 | -5.02629400 |
| H | 2.59996900  | 0.16913900  | -3.86969800 |
| H | 4.34142400  | -0.16956600 | -3.84105800 |

**TS7-L4**

|   |             |             |             |
|---|-------------|-------------|-------------|
| C | 0.00414000  | 0.07854600  | -0.04474900 |
| N | 0.65778900  | 0.16367900  | 1.16335700  |
| N | 0.66722800  | -0.91767600 | -0.73175800 |
| C | 0.39237600  | 1.11372700  | 2.20413800  |
| C | 0.10175000  | 2.85465900  | 4.36855300  |
| C | -0.52864100 | 0.79464500  | 3.21818500  |

---

|    |             |             |             |
|----|-------------|-------------|-------------|
| C  | 1.14696300  | 2.30003000  | 2.23579100  |
| C  | 0.97930000  | 3.15356300  | 3.32658200  |
| C  | -0.63645800 | 1.67257900  | 4.29779100  |
| H  | 1.54745700  | 4.09030600  | 3.36028100  |
| H  | -1.33381000 | 1.43770200  | 5.10943600  |
| C  | 0.36461300  | -1.25101000 | -2.09218700 |
| C  | -0.21303200 | -1.88614500 | -4.76183800 |
| C  | -0.48500300 | -2.33418200 | -2.37716300 |
| C  | 0.94750000  | -0.49383000 | -3.12578000 |
| C  | 0.66931500  | -0.85303800 | -4.44530100 |
| C  | -0.78184200 | -2.60872800 | -3.71252700 |
| H  | 1.15816700  | -0.30097700 | -5.25691300 |
| H  | -1.47581700 | -3.42753000 | -3.93802900 |
| C  | 1.87814500  | 0.66868600  | -2.84261100 |
| H  | 2.04861000  | 0.68141800  | -1.75244400 |
| C  | -1.04426100 | -3.22393000 | -1.28503200 |
| H  | -1.00376000 | -2.64344400 | -0.34390500 |
| C  | 2.15727700  | 2.61653100  | 1.14337600  |
| H  | 1.75279600  | 2.17890300  | 0.20796800  |
| C  | -1.31080000 | -0.50946400 | 3.16783400  |
| H  | -1.50028600 | -0.71608100 | 2.09441000  |
| C  | -0.07730600 | 3.80152100  | 5.51426600  |
| H  | -0.37242700 | 3.27619800  | 6.43550000  |
| Ni | -1.61553700 | 0.76487500  | -0.68826900 |
| H  | 0.84151300  | 4.37191800  | 5.71922600  |
| H  | -0.87011100 | 4.53703300  | 5.29295100  |
| C  | 2.30316200  | 4.10631100  | 0.86086200  |
| C  | 1.14994000  | 4.88643300  | 0.71266600  |
| C  | 3.54666200  | 4.71716400  | 0.67123200  |
| C  | 1.23704600  | 6.23945000  | 0.40460900  |

---

|   |             |             |             |
|---|-------------|-------------|-------------|
| H | 0.16450100  | 4.42452400  | 0.83679300  |
| C | 3.63498900  | 6.07343500  | 0.35184800  |
| H | 4.46586900  | 4.13172600  | 0.76964600  |
| C | 2.48224200  | 6.84183200  | 0.22308700  |
| H | 0.31776100  | 6.82515600  | 0.30313000  |
| H | 4.61914500  | 6.52986800  | 0.20938100  |
| H | 2.55197100  | 7.90702100  | -0.01678800 |
| C | -0.44090600 | -1.64448900 | 3.68024800  |
| C | 0.02940800  | -1.64487600 | 4.99829900  |
| C | -0.08481500 | -2.70583800 | 2.84778200  |
| C | 0.83253500  | -2.67963100 | 5.46743900  |
| H | -0.24547200 | -0.82182500 | 5.66761700  |
| C | 0.73115600  | -3.73954100 | 3.30778100  |
| H | -0.43715500 | -2.70908600 | 1.80927300  |
| C | 1.19060300  | -3.72951800 | 4.62102100  |
| H | 1.18696400  | -2.66519700 | 6.50264400  |
| H | 1.01908500  | -4.54550400 | 2.62418100  |
| H | 1.83565200  | -4.53492300 | 4.98428100  |
| C | 4.30379200  | -4.24616500 | -0.32367800 |
| C | 4.84754300  | -4.11274800 | 0.93893700  |
| C | 4.35408100  | -3.11926700 | 1.82989600  |
| C | 3.31130600  | -2.32208000 | 1.35602000  |
| C | 2.73060200  | -2.46416800 | 0.05998800  |
| C | 3.24115100  | -3.42463100 | -0.78599800 |
| H | 5.61673000  | -3.44794300 | 3.57969800  |
| H | 4.69522700  | -5.01513600 | -0.99657300 |
| H | 5.66260600  | -4.76965400 | 1.26008100  |
| C | 4.80340000  | -2.85052300 | 3.15463100  |
| C | 2.70462000  | -1.28126800 | 2.11693300  |
| H | 2.84725500  | -3.56353400 | -1.79721000 |



---

|   |             |             |             |
|---|-------------|-------------|-------------|
| C | 3.15950700  | -1.04126200 | 3.39208200  |
| C | 4.21745300  | -1.84561400 | 3.89703600  |
| H | 2.72063400  | -0.25658700 | 4.01711400  |
| H | 4.57517800  | -1.65515500 | 4.91345300  |
| C | 1.69002500  | -1.44448300 | 0.03642300  |
| C | 1.68001200  | -0.76071600 | 1.22493600  |
| C | -2.90247300 | 2.89084100  | 0.81970600  |
| C | -2.97512800 | 4.22763900  | 1.19745200  |
| C | -2.43477000 | 5.23354800  | 0.39321900  |
| C | -1.76973000 | 4.85863100  | -0.77375000 |
| C | -1.65616100 | 3.52011500  | -1.13922800 |
| C | -2.26622700 | 2.49957700  | -0.37725700 |
| H | -3.39440900 | 2.13892100  | 1.44071200  |
| H | -3.48688500 | 4.48629500  | 2.13157500  |
| H | -1.29593700 | 5.61611500  | -1.40981800 |
| H | -1.08170800 | 3.27479000  | -2.03603500 |
| C | -5.65313200 | -0.20013500 | 1.05160600  |
| C | -4.47199600 | 0.17985400  | 0.43227700  |
| C | -4.46416300 | 0.89698800  | -0.78151200 |
| C | -5.71107800 | 1.22574000  | -1.36587300 |
| C | -6.88821400 | 0.82111700  | -0.73123500 |
| C | -6.88051100 | 0.11421400  | 0.46701400  |
| H | -5.60764700 | -0.75778500 | 1.99300400  |
| H | -3.50821400 | -0.09425600 | 0.87853100  |
| C | -5.78082700 | 1.97178500  | -2.66936300 |
| H | -7.84291800 | 1.08386100  | -1.20346200 |
| H | -7.81907500 | -0.18796500 | 0.93997700  |
| C | -4.45563200 | 2.62073900  | -3.01426300 |
| C | -3.30829300 | 1.64435500  | -2.78345600 |
| H | -6.07991500 | 1.27267100  | -3.47586800 |

---

|   |             |             |             |
|---|-------------|-------------|-------------|
| H | -4.44856600 | 2.97965600  | -4.05836400 |
| N | -3.25106700 | 1.25880700  | -1.37166100 |
| H | -4.28274600 | 3.50075400  | -2.36668200 |
| H | -6.58828400 | 2.72353600  | -2.62373000 |
| C | -2.68381800 | -0.47830400 | 3.83054900  |
| C | -3.22651600 | -1.63885800 | 4.39578300  |
| C | -3.48271600 | 0.67251100  | 3.81018800  |
| C | -4.51180000 | -1.64504700 | 4.93488000  |
| H | -2.63516300 | -2.55926200 | 4.41707700  |
| C | -4.76546800 | 0.67059800  | 4.35076900  |
| H | -3.09263300 | 1.59315400  | 3.36657100  |
| C | -5.28614900 | -0.48826100 | 4.92190600  |
| H | -4.90750300 | -2.56663200 | 5.37199600  |
| H | -5.36501000 | 1.58507600  | 4.31531900  |
| H | -6.29281000 | -0.49057900 | 5.34974300  |
| C | 3.49427100  | 1.94834200  | 1.41009200  |
| C | 4.13776700  | 1.22465500  | 0.40436200  |
| C | 4.13985900  | 2.08509300  | 2.64327400  |
| C | 5.38114100  | 0.63418600  | 0.62093100  |
| H | 3.65661900  | 1.11574900  | -0.57366500 |
| C | 5.38863000  | 1.50946300  | 2.86227300  |
| H | 3.65578700  | 2.65393200  | 3.44507300  |
| C | 6.01284900  | 0.77681800  | 1.85345400  |
| H | 5.85223500  | 0.06127400  | -0.18476500 |
| H | 5.87771400  | 1.62901900  | 3.83400000  |
| H | 6.98808700  | 0.31423800  | 2.03085100  |
| H | -2.52233600 | 6.28658300  | 0.67781700  |
| C | -0.21966600 | -4.47951700 | -1.05701900 |
| C | 0.59938300  | -5.05129600 | -2.03357300 |
| C | -0.33185500 | -5.13339700 | 0.17643200  |

---

|   |             |             |             |
|---|-------------|-------------|-------------|
| C | 1.29463500  | -6.23500900 | -1.78160300 |
| H | 0.70524400  | -4.56449800 | -3.00866800 |
| C | 0.36612300  | -6.30842600 | 0.43473100  |
| H | -0.99567800 | -4.71527700 | 0.94280300  |
| C | 1.18728700  | -6.86478300 | -0.54603300 |
| H | 1.93010100  | -6.66428900 | -2.56255500 |
| H | 0.26188000  | -6.79842000 | 1.40797000  |
| H | 1.73623500  | -7.78952900 | -0.34680900 |
| C | -2.51671300 | -3.52604900 | -1.51821100 |
| C | -2.98633600 | -4.77681000 | -1.92506700 |
| C | -3.43304400 | -2.48485700 | -1.34103300 |
| C | -4.34820700 | -4.97732600 | -2.15400300 |
| H | -2.28521000 | -5.60736800 | -2.06040800 |
| C | -4.79199200 | -2.68385300 | -1.56051900 |
| H | -3.06201800 | -1.49600500 | -1.03704800 |
| C | -5.25264900 | -3.93498900 | -1.97204700 |
| H | -4.70324500 | -5.96234600 | -2.47198600 |
| H | -5.49089500 | -1.85604700 | -1.39829600 |
| H | -6.32076300 | -4.09695500 | -2.14397700 |
| C | 1.33213200  | 2.04631400  | -3.18181300 |
| C | 0.29063700  | 2.28934300  | -4.08033500 |
| C | 1.95814300  | 3.14817500  | -2.58197200 |
| C | -0.09709100 | 3.59615100  | -4.38474500 |
| H | -0.24148500 | 1.45442800  | -4.54643800 |
| C | 1.56773700  | 4.45038300  | -2.87259700 |
| H | 2.77878300  | 2.98102500  | -1.87275700 |
| C | 0.53908800  | 4.67951100  | -3.78685600 |
| H | -0.91890800 | 3.76215900  | -5.08858600 |
| H | 2.06604000  | 5.28766600  | -2.37271500 |
| H | 0.22769600  | 5.70131400  | -4.02297000 |

---

|   |             |             |             |
|---|-------------|-------------|-------------|
| C | 3.24086700  | 0.41348800  | -3.47358200 |
| C | 3.65745100  | 1.02418900  | -4.65889300 |
| C | 4.10216500  | -0.49938700 | -2.85355600 |
| C | 4.89986600  | 0.71845600  | -5.21456700 |
| H | 3.00734600  | 1.75663100  | -5.14987500 |
| C | 5.34266100  | -0.80424000 | -3.40407000 |
| H | 3.79087700  | -0.97995300 | -1.91876900 |
| C | 5.74596200  | -0.19539400 | -4.59201500 |
| H | 5.21058300  | 1.20666700  | -6.14308800 |
| H | 5.99758600  | -1.52142800 | -2.89856200 |
| H | 6.72126900  | -0.42896800 | -5.02862600 |
| C | -0.56651300 | -2.18837900 | -6.18431300 |
| H | -0.81449800 | -3.25121200 | -6.32652600 |
| H | -1.45173700 | -1.60761400 | -6.49797300 |
| H | 0.25245000  | -1.92748300 | -6.87192900 |
| C | -3.35007400 | 0.41966800  | -3.68617800 |
| H | -4.20879200 | -0.23718300 | -3.46610800 |
| H | -3.41204100 | 0.71781200  | -4.74847300 |
| H | -2.43723700 | -0.18585500 | -3.54640700 |
| H | -2.36871200 | 2.17337600  | -3.00694100 |

**INT8-L4**

|   |             |             |             |
|---|-------------|-------------|-------------|
| C | -0.09010600 | -0.11597800 | -0.30055000 |
| N | -0.61787100 | -0.91513800 | 0.72177900  |
| N | -0.60086600 | 1.14543400  | -0.00474600 |
| C | -0.43727500 | -2.32873100 | 0.85619200  |
| C | -0.21630400 | -5.08613500 | 1.32136100  |
| C | 0.63860700  | -2.81912100 | 1.62370800  |
| C | -1.39657300 | -3.20199100 | 0.31061700  |
| C | -1.26149100 | -4.57174700 | 0.55659000  |

---

|    |             |             |             |
|----|-------------|-------------|-------------|
| C  | 0.72223200  | -4.19316200 | 1.84397400  |
| H  | -1.99781900 | -5.26314800 | 0.13005900  |
| H  | 1.55335800  | -4.58481800 | 2.44182100  |
| C  | -0.55893700 | 2.32927800  | -0.80821700 |
| C  | -0.74088600 | 4.83718000  | -2.06635000 |
| C  | 0.44247800  | 3.28970800  | -0.59214700 |
| C  | -1.63571900 | 2.59684500  | -1.68101200 |
| C  | -1.71258300 | 3.85668200  | -2.27477200 |
| C  | 0.33472300  | 4.52353900  | -1.23908300 |
| H  | -2.57261400 | 4.08751500  | -2.91498000 |
| H  | 1.12066300  | 5.27089400  | -1.07590100 |
| C  | -2.70188400 | 1.55956500  | -1.98835100 |
| H  | -2.60990800 | 0.76897900  | -1.22330800 |
| C  | 1.63946100  | 3.03567700  | 0.30682900  |
| H  | 1.71666900  | 1.93786100  | 0.43943200  |
| C  | -2.59616500 | -2.66910800 | -0.45426500 |
| H  | -2.27388400 | -1.70990900 | -0.90690800 |
| C  | 1.64917100  | -1.85961300 | 2.23581200  |
| H  | 1.83046400  | -1.08395300 | 1.46578300  |
| C  | -0.07992300 | -6.55838300 | 1.55984300  |
| H  | 0.24828000  | -6.77195200 | 2.58927200  |
| Ni | 0.91895500  | -0.74525400 | -1.73049600 |
| H  | -1.02651600 | -7.09088500 | 1.38288900  |
| H  | 0.67537600  | -7.00160400 | 0.88817400  |
| C  | -3.05119400 | -3.52996100 | -1.62923600 |
| C  | -2.12337100 | -4.21029400 | -2.42800900 |
| C  | -4.39740100 | -3.57918100 | -2.01197100 |
| C  | -2.51820000 | -4.90566900 | -3.56721800 |
| H  | -1.06704700 | -4.19632300 | -2.14807800 |
| C  | -4.79752100 | -4.27245200 | -3.15407700 |

---

|   |             |             |             |
|---|-------------|-------------|-------------|
| H | -5.15264500 | -3.06265200 | -1.41172000 |
| C | -3.86099400 | -4.93900800 | -3.93900100 |
| H | -1.76667500 | -5.42555100 | -4.16916800 |
| H | -5.85679400 | -4.29187400 | -3.42709600 |
| H | -4.17530000 | -5.48687200 | -4.83205800 |
| C | 1.06475900  | -1.15036300 | 3.44043600  |
| C | 0.59208400  | -1.86665800 | 4.54573500  |
| C | 0.98884400  | 0.24275000  | 3.46904800  |
| C | 0.07083500  | -1.20268500 | 5.65286900  |
| H | 0.63811100  | -2.96238600 | 4.53502600  |
| C | 0.44909100  | 0.91361300  | 4.56583200  |
| H | 1.33907900  | 0.81784800  | 2.60279500  |
| C | -0.00617900 | 0.19004900  | 5.66453900  |
| H | -0.29187800 | -1.77780000 | 6.51065800  |
| H | 0.38240800  | 2.00750100  | 4.54627100  |
| H | -0.43521500 | 0.70982400  | 6.52636900  |
| C | -3.46457900 | 3.68099400  | 3.10510200  |
| C | -3.92418600 | 2.80144300  | 4.06652000  |
| C | -3.53706500 | 1.43201800  | 4.02769000  |
| C | -2.68335900 | 1.05680400  | 2.99096400  |
| C | -2.19677400 | 1.95872600  | 1.99755700  |
| C | -2.59761700 | 3.27606400  | 2.05477000  |
| H | -4.60430600 | 0.63526300  | 5.75867200  |
| H | -3.78021400 | 4.72791600  | 3.14526700  |
| H | -4.59270400 | 3.15186600  | 4.85989800  |
| C | -3.93636500 | 0.39824700  | 4.92385800  |
| C | -2.22218200 | -0.27708100 | 2.78478000  |
| H | -2.28577700 | 3.99916700  | 1.29371800  |
| C | -2.62578100 | -1.25423100 | 3.66328900  |
| C | -3.48835600 | -0.89264200 | 4.73559300  |

---

|   |             |             |             |
|---|-------------|-------------|-------------|
| H | -2.30261600 | -2.29412000 | 3.54834400  |
| H | -3.80890400 | -1.67548900 | 5.43002400  |
| C | -1.39099100 | 1.11256200  | 1.13210400  |
| C | -1.40364600 | -0.17623700 | 1.58333700  |
| C | 2.48822300  | -2.23551500 | -2.10590000 |
| C | 1.22108400  | -2.74295300 | -2.44672700 |
| C | 0.39366300  | -2.02931700 | -3.33939500 |
| C | 0.82401500  | -0.78524700 | -3.84722200 |
| C | 2.08395800  | -0.26374100 | -3.48667600 |
| C | 2.93142700  | -0.99746800 | -2.62532200 |
| H | 3.16750100  | -2.80135000 | -1.46093900 |
| H | 0.89999100  | -3.70203700 | -2.02448300 |
| H | 0.16830400  | -0.22198200 | -4.51511200 |
| H | 2.43496700  | 0.69219800  | -3.88985300 |
| C | 4.47778400  | 0.14937200  | 1.21454100  |
| C | 3.97095400  | -0.02401400 | -0.06431000 |
| C | 4.79712500  | -0.44406500 | -1.12239500 |
| C | 6.15792900  | -0.70688700 | -0.85193600 |
| C | 6.64490000  | -0.50539400 | 0.44344400  |
| C | 5.82834900  | -0.07562700 | 1.48046200  |
| H | 3.80128500  | 0.44661300  | 2.02531900  |
| H | 2.90429200  | 0.13225900  | -0.26768200 |
| C | 7.06582700  | -1.24512500 | -1.92199400 |
| H | 7.70282500  | -0.72192900 | 0.63497500  |
| H | 6.22906900  | 0.05473700  | 2.48930800  |
| C | 6.26037900  | -1.88013000 | -3.03699200 |
| C | 5.18605500  | -0.91491200 | -3.52339200 |
| H | 7.70589000  | -0.43977800 | -2.33310100 |
| H | 6.90519700  | -2.17973700 | -3.88061900 |
| N | 4.27219200  | -0.57132700 | -2.41850400 |

---

|   |             |             |             |
|---|-------------|-------------|-------------|
| H | 5.76501500  | -2.79763700 | -2.66617500 |
| H | 7.76541600  | -1.97470700 | -1.47841200 |
| C | 3.00909100  | -2.48752100 | 2.50222200  |
| C | 3.66376600  | -2.41530200 | 3.73312000  |
| C | 3.67988800  | -3.09938900 | 1.43545600  |
| C | 4.94656200  | -2.94506700 | 3.89236600  |
| H | 3.17702800  | -1.92905000 | 4.58333600  |
| C | 4.95766500  | -3.61992800 | 1.58555700  |
| H | 3.17305500  | -3.15117700 | 0.46730100  |
| C | 5.59948300  | -3.54629300 | 2.82275200  |
| H | 5.43874100  | -2.87732700 | 4.86737600  |
| H | 5.46225200  | -4.07717800 | 0.72816000  |
| H | 6.60704400  | -3.95371200 | 2.94757200  |
| C | -3.74363500 | -2.34667300 | 0.48953600  |
| C | -4.36443400 | -1.09758700 | 0.44441000  |
| C | -4.23774100 | -3.29886800 | 1.38729800  |
| C | -5.43653900 | -0.79173000 | 1.28009400  |
| H | -4.00035600 | -0.34173000 | -0.25891500 |
| C | -5.31304900 | -3.00259100 | 2.22064700  |
| H | -3.77251500 | -4.28913500 | 1.43713900  |
| C | -5.91330200 | -1.74477100 | 2.17521000  |
| H | -5.89394900 | 0.20178200  | 1.22509900  |
| H | -5.68418400 | -3.76155800 | 2.91624900  |
| H | -6.75076100 | -1.50891400 | 2.83823400  |
| H | -0.59281600 | -2.41259300 | -3.61831600 |
| C | 1.52978200  | 3.63350300  | 1.69739500  |
| C | 0.54682200  | 4.55019300  | 2.07167200  |
| C | 2.48613400  | 3.26361500  | 2.65445500  |
| C | 0.50750100  | 5.07287100  | 3.36611100  |
| H | -0.20274300 | 4.86858200  | 1.34158500  |



---

|   |             |             |             |
|---|-------------|-------------|-------------|
| C | 2.45849300  | 3.78915300  | 3.94046300  |
| H | 3.27586300  | 2.55926300  | 2.36745600  |
| C | 1.46269900  | 4.69779200  | 4.30425800  |
| H | -0.28090200 | 5.78198500  | 3.63712300  |
| H | 3.21638200  | 3.48308000  | 4.66772500  |
| H | 1.43490600  | 5.11015600  | 5.31705400  |
| C | 2.90392200  | 3.46044200  | -0.42737800 |
| C | 3.69465900  | 4.54606800  | -0.04675600 |
| C | 3.24465300  | 2.75355700  | -1.58524800 |
| C | 4.80531500  | 4.91537700  | -0.80795800 |
| H | 3.44431700  | 5.11578200  | 0.85412200  |
| C | 4.34631800  | 3.12268700  | -2.34506100 |
| H | 2.62061800  | 1.90264300  | -1.88794500 |
| C | 5.13481400  | 4.20679500  | -1.95858500 |
| H | 5.41507600  | 5.76819400  | -0.49449700 |
| H | 4.59210400  | 2.55181100  | -3.24386300 |
| H | 6.00464400  | 4.49718400  | -2.55527800 |
| C | -2.52582200 | 0.86213500  | -3.32787300 |
| C | -1.91157300 | 1.44980000  | -4.43610700 |
| C | -3.09464200 | -0.40823200 | -3.48308100 |
| C | -1.88345100 | 0.79227500  | -5.66717200 |
| H | -1.44146900 | 2.43334900  | -4.34270300 |
| C | -3.05211100 | -1.07700900 | -4.70194200 |
| H | -3.59383900 | -0.88268300 | -2.62890100 |
| C | -2.44866200 | -0.47273600 | -5.80539300 |
| H | -1.40352700 | 1.27417100  | -6.52463800 |
| H | -3.49698300 | -2.07497700 | -4.78410300 |
| H | -2.41830200 | -0.98877800 | -6.76933900 |
| C | -4.10617700 | 2.13808000  | -1.84668000 |
| C | -4.86395800 | 2.55500400  | -2.94526100 |

---

|   |             |             |             |
|---|-------------|-------------|-------------|
| C | -4.65634200 | 2.28994800  | -0.56829900 |
| C | -6.12408800 | 3.12576300  | -2.76768400 |
| H | -4.46811200 | 2.42521800  | -3.95822400 |
| C | -5.91290600 | 2.86009800  | -0.38733900 |
| H | -4.08840100 | 1.95546100  | 0.30579100  |
| C | -6.65313000 | 3.28428100  | -1.48966800 |
| H | -6.69928700 | 3.44527500  | -3.64189700 |
| H | -6.31180000 | 2.97076300  | 0.62663000  |
| H | -7.64240500 | 3.73065900  | -1.35328600 |
| C | -0.83603200 | 6.17091000  | -2.74023700 |
| H | -0.33173400 | 6.95700600  | -2.15785300 |
| H | -0.35579900 | 6.14924000  | -3.73385400 |
| H | -1.88340900 | 6.47307400  | -2.89468200 |
| H | 4.57117800  | -1.44262600 | -4.27393700 |
| C | 5.77221800  | 0.32252700  | -4.18169900 |
| H | 4.98035200  | 0.92516500  | -4.65535000 |
| H | 6.28776100  | 0.96365900  | -3.44772000 |
| H | 6.49843500  | 0.04350900  | -4.96381200 |

---

## References

1. Wang, Z.-C., Xie, P.-P., Xu, Y., Hong, X. & Shi, S.-L. Low-Temperature Ni-Catalyzed C–N Cross-Coupling via Kinetic Resolution Enabled by a Bulky and Flexible Chiral N-Heterocyclic Carbene Ligand. *Angew. Chem., Int. Ed.* **60**, 16077–16084 (2021).
2. Cran, J. W., Vidhani, D. V. & Krafft, M. E. Copper-Catalyzed N-tert-Butylation of Aromatic Amines under Mild Conditions Using tert-Butyl 2,2,2-Trichloroacetimidate. *Synlett.* **25**, 1550-1554 (2014).
3. Pirali, T., Zhang, F., Miller, A. H. & Head, J. L. McAusland, D., Greaney, M. F. Transition-Metal-Free Direct Arylation of Anilines. *Angew. Chem. Int. Ed.* **51**, 1006-1009 (2012).
4. Li, C., Kawamata, Y., Nakamura, H., Vantourout, J. C., Liu, Z., Hou, Q., Bao, D., Yan, M. & Baran, P. S. Electrochemically Enabled, Nickel-Catalyzed Amination. *Angew. Chem. Int. Ed.* **56**, 13088-13093 (2017).
5. Zhou, W., Fan, M., Yin, J., Jiang, Y. & Ma, D. CuI/Oxalic Diamide Catalyzed Coupling Reaction of (Hetero)Aryl Chlorides and Amines. *J. Am. Chem. Soc.* **137**, 11942 -11945 (2015).
6. Huang, J. & Yang, L. Nickel-Catalyzed Amination of Aryl Phosphates through Cleaving Aryl C–O Bonds. *Org. Lett.* **13**, 3750-3753 (2011).
7. Jiang, J., Zhu, H., Shen, Y. & Tu, T. Acenaphthoimidazolium chloride-enabled nickel-catalyzed amination of bulky aryl tosylates. *Org. Chem. Front.* **1**, 1172-1175 (2014).

- 
8. Miki, Y., Hirano, K., Satoh, T. & Miura, M. Copper-Catalyzed Electrophilic Amination of Arylsilanes with Hydroxylamines. *Org. Lett.* **15**, 172-175 (2013).
9. Moehrle M. Cyclisierungen über Enamin-Zwischenstufen bei Amindehydrierungen/Cyclizations via Enamine Intermediates with Amine Dehydrogenations. *Zeitschrift für Naturforschung - Section B Journal of Chemical Sciences*, **54**, 214-224 (1999).
10. M. J. Frisch, G. W. Trucks, H. B. Schlegel, G. E. Scuseria, M. A. Robb, J. R. Cheeseman, G. Scalmani, V. Barone, B. Mennucci, G. A. Petersson, H. Nakatsuji, M. Caricato, X. Li, H. P. Hratchian, A. F. Izmaylov, J. Bloino, G. Zheng, J. L. Sonnenberg, M. Hada, M. Ehara, K. Toyota, R. Fukuda, J. Hasegawa, M. Ishida, T. Nakajima, Y. Honda, O. Kitao, H. Nakai, T. Vreven, J. A., Jr. Montgomery, J. E. Peralta, F. Ogliaro, M. Bearpark, J. J. Heyd, E. Brothers, K. N. Kudin, V. N. Staroverov, R. Kobayashi, J. Normand, K. Raghavachari, A. Rendell, J. C. Burant, S. S. Iyengar, J. Tomasi, M. Cossi, N. Rega, J. M. Millam, M. Klene, J. E. Knox, J. B. Cross, V. Bakken, C. Adamo, J. Jaramillo, R. Gomperts, R. E. Stratmann, O. Yazyev, A. J. Austin, R. Cammi, C. Pomelli, J. W. Ochterski, R. L. Martin, K. Morokuma, V. G. Zakrzewski, G. A. Voth, P. Salvador, J. J. Dannenberg, S. Dapprich, A. D. Daniels, O. Farkas, J. B. Foresman, J. V. Ortiz, J. Cioslowski, D. J. Fox, Gaussian 16, Revision A.03; Gaussian Inc., Wallingford, CT, 2016.
11. Zhao, Y., & Truhlar, D. G. The M06 suite of density functionals for main group thermochemistry, thermochemical kinetics, noncovalent interactions, excited states, and transition elements: two new functionals and systematic testing of four M06-class functionals and 12 other functionals. *Theor. Chem. Acc.* **120**, 215-241 (2008).
12. Weigend, F., & Ahlrichs, R. Balanced basis sets of split valence, triple zeta valence and quadruple zeta valence quality for H to Rn: Design and assessment of accuracy. *Phys. Chem. Chem. Phys.* **7**, 3297-3305 (2005).
13. Marenich, A. V., Cramer, C. J., & Truhlar, D. G. Universal solvation model based on solute electron density and on a continuum model of the solvent defined by the bulk dielectric constant and atomic surface tensions. *J. Phys. Chem. B.* **113**, 6378-6396 (2009).

# NMR Spectra

3a

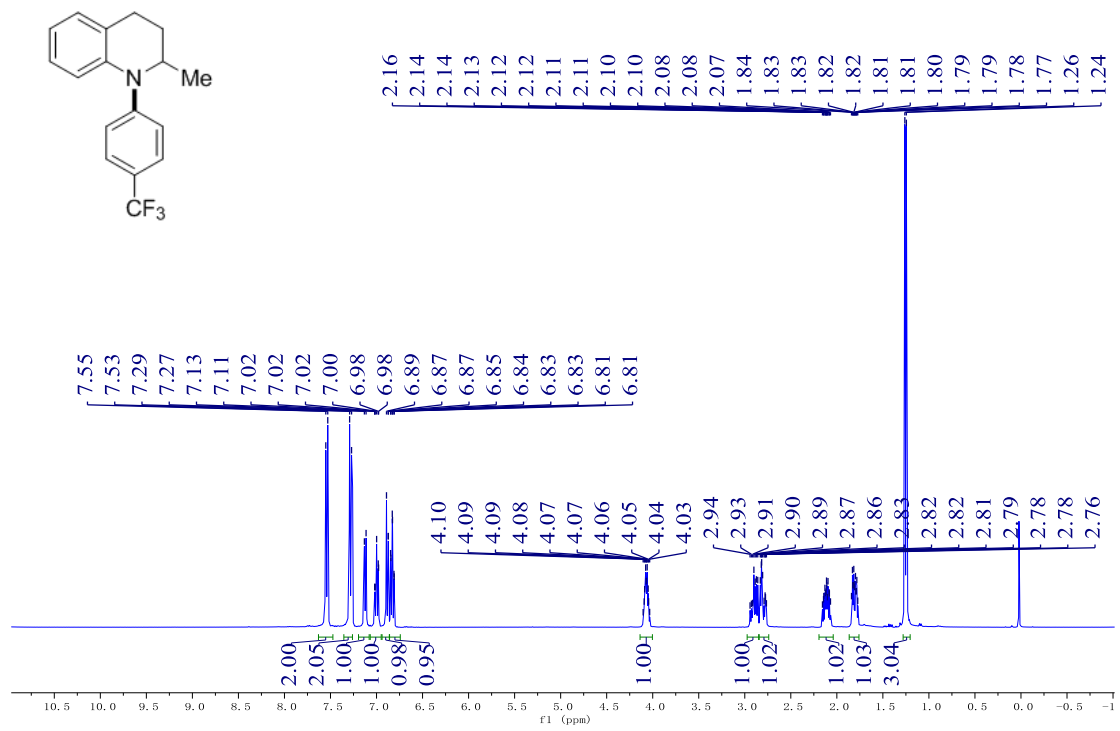

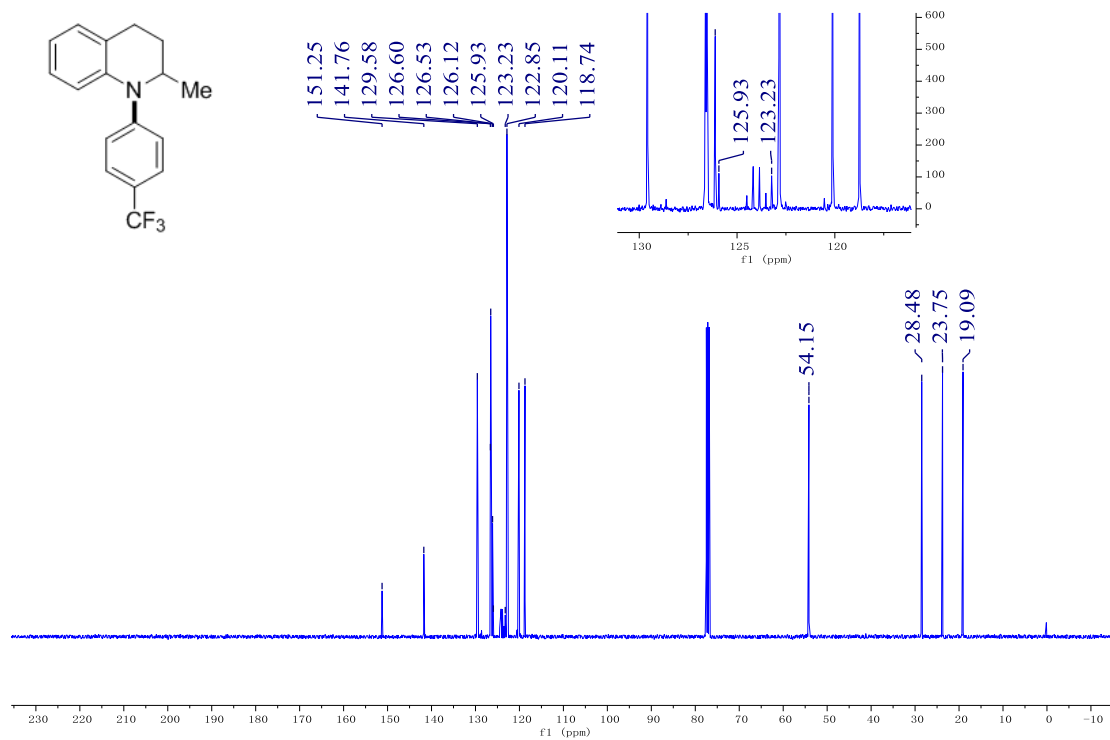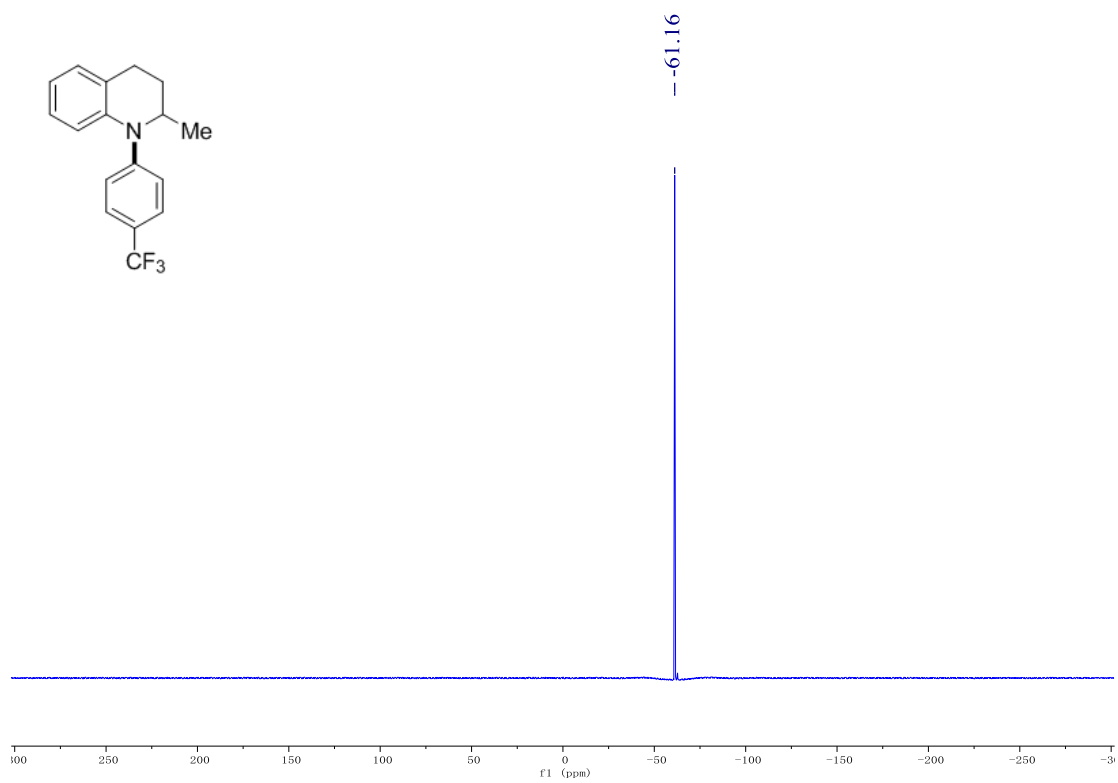

3b

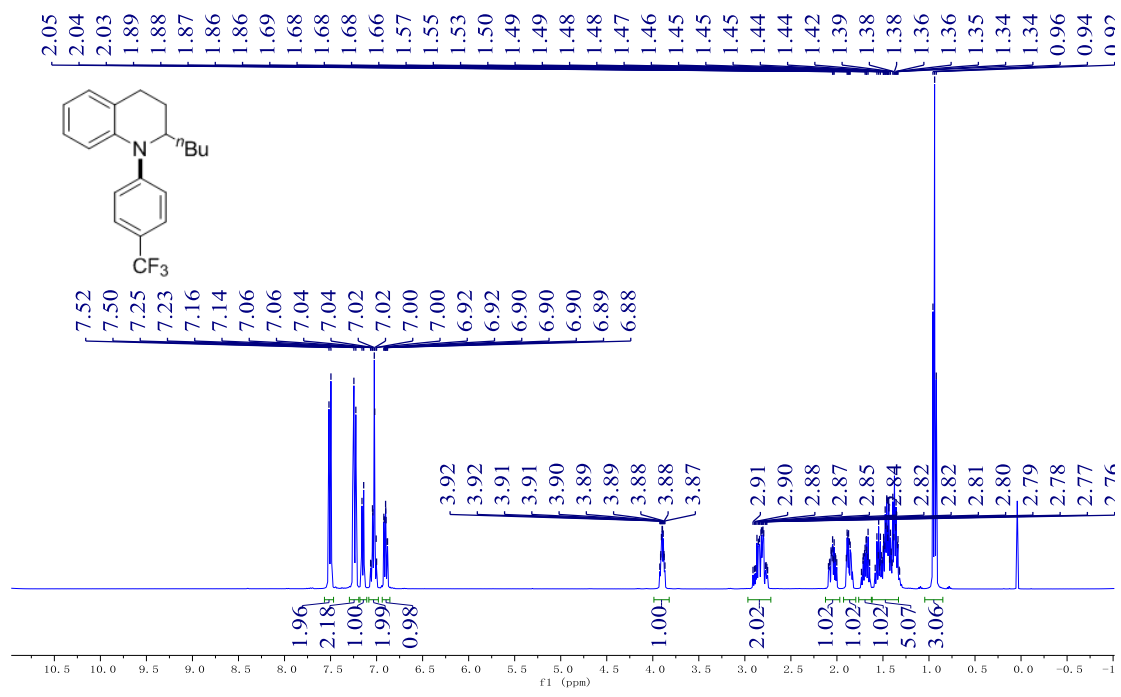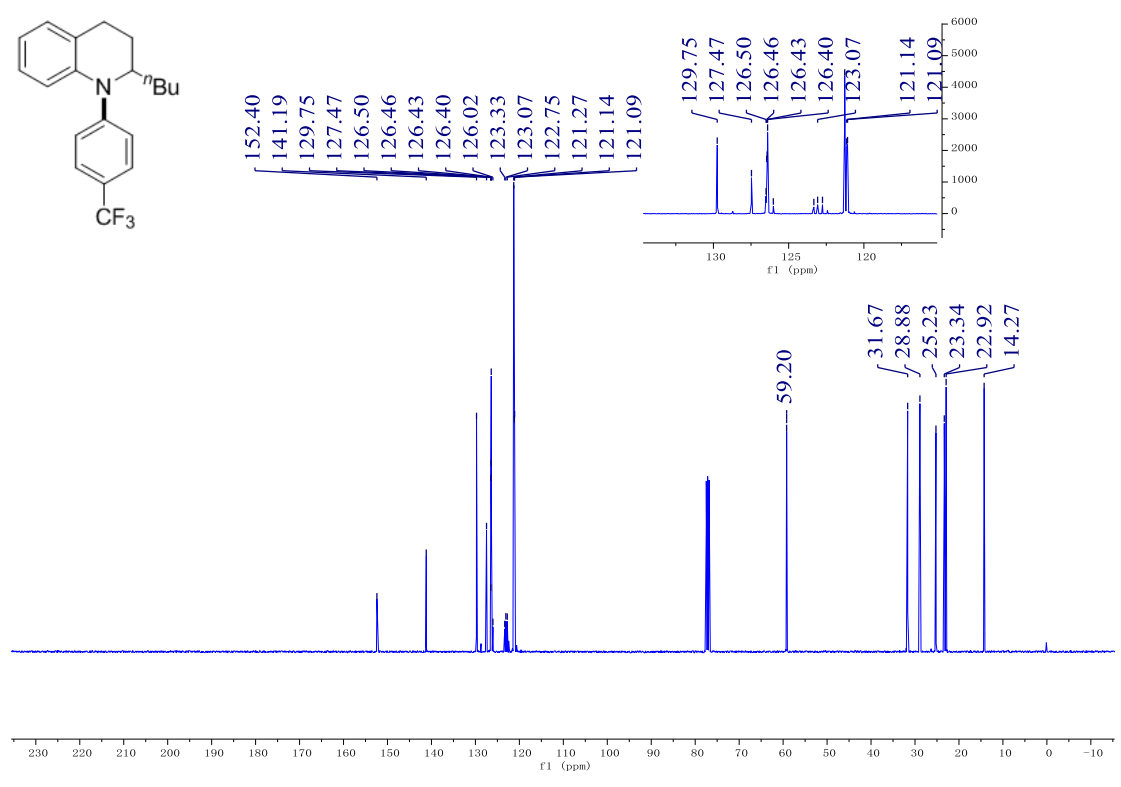

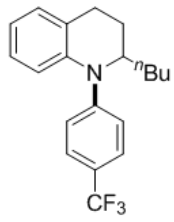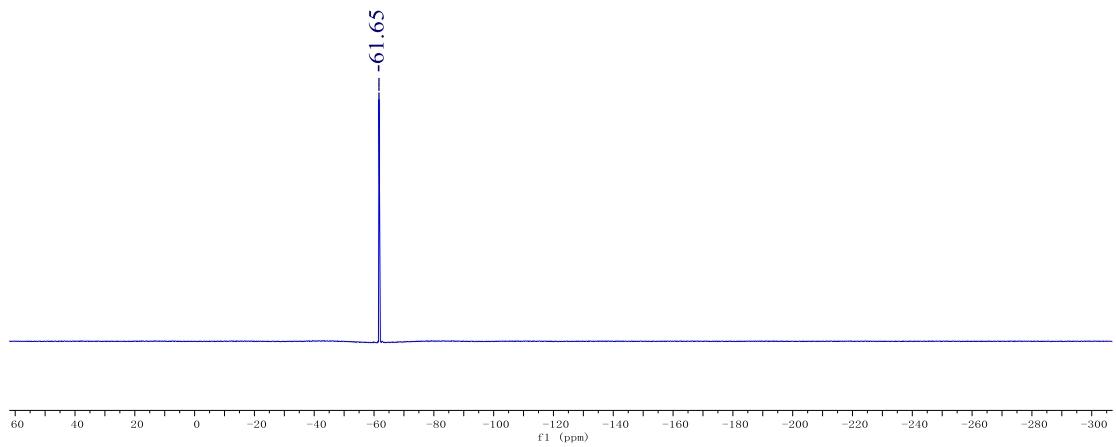

3c

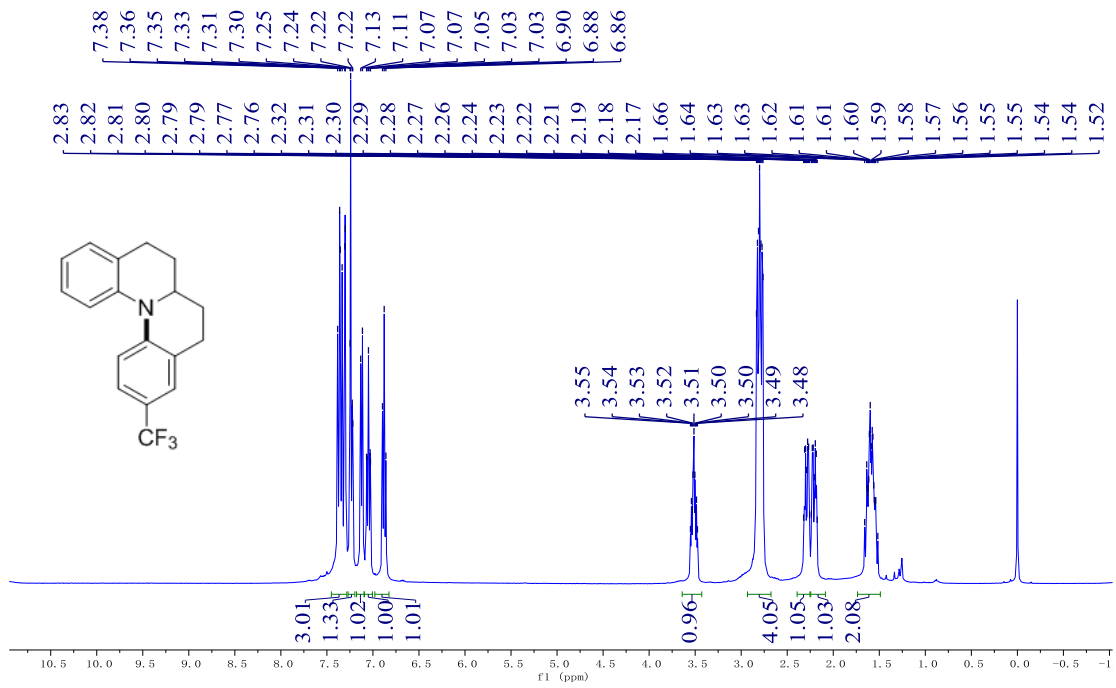



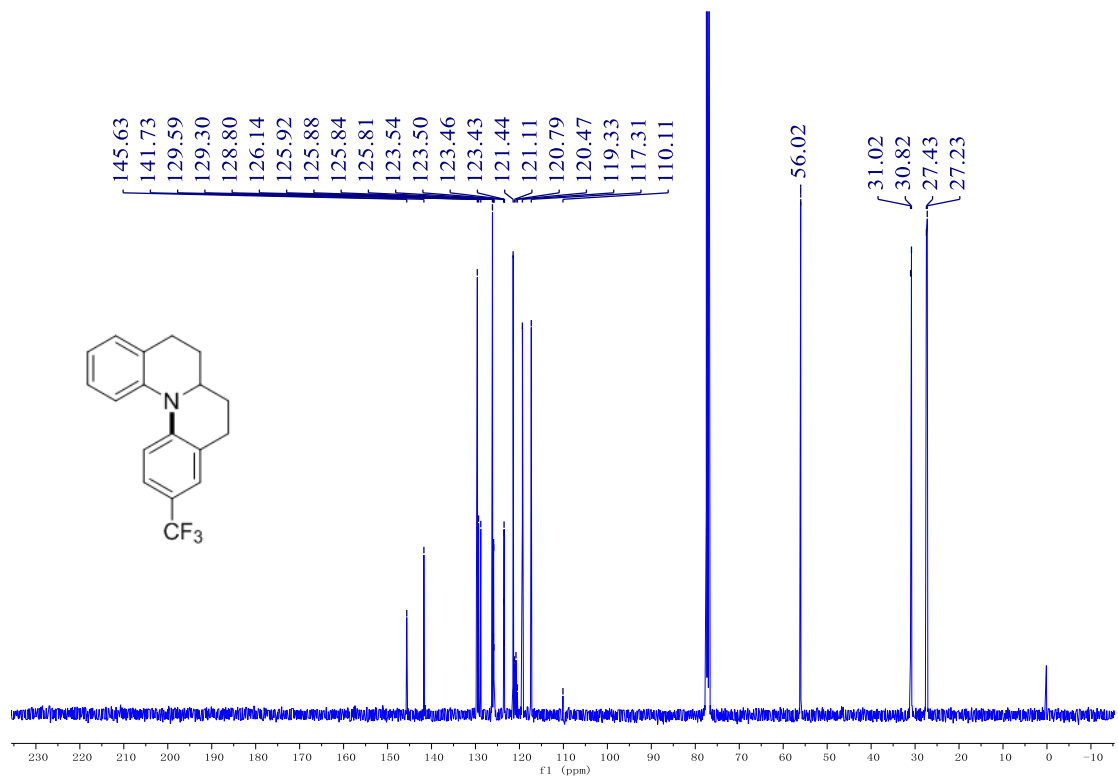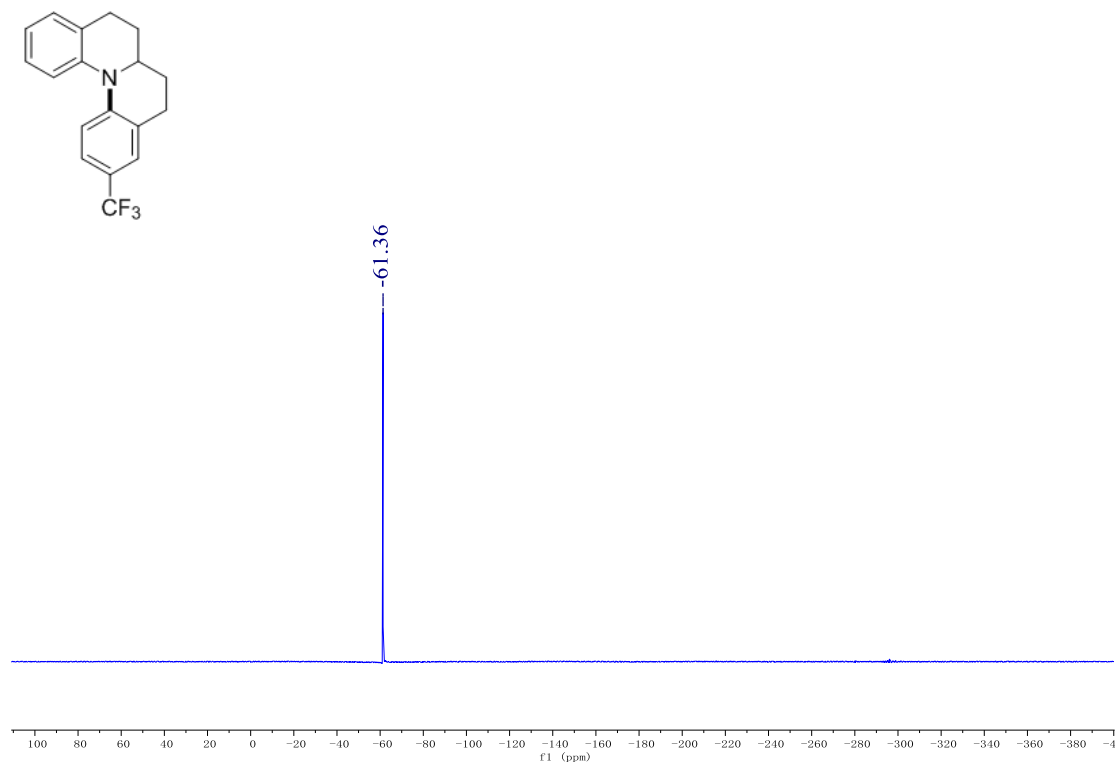

**3d**

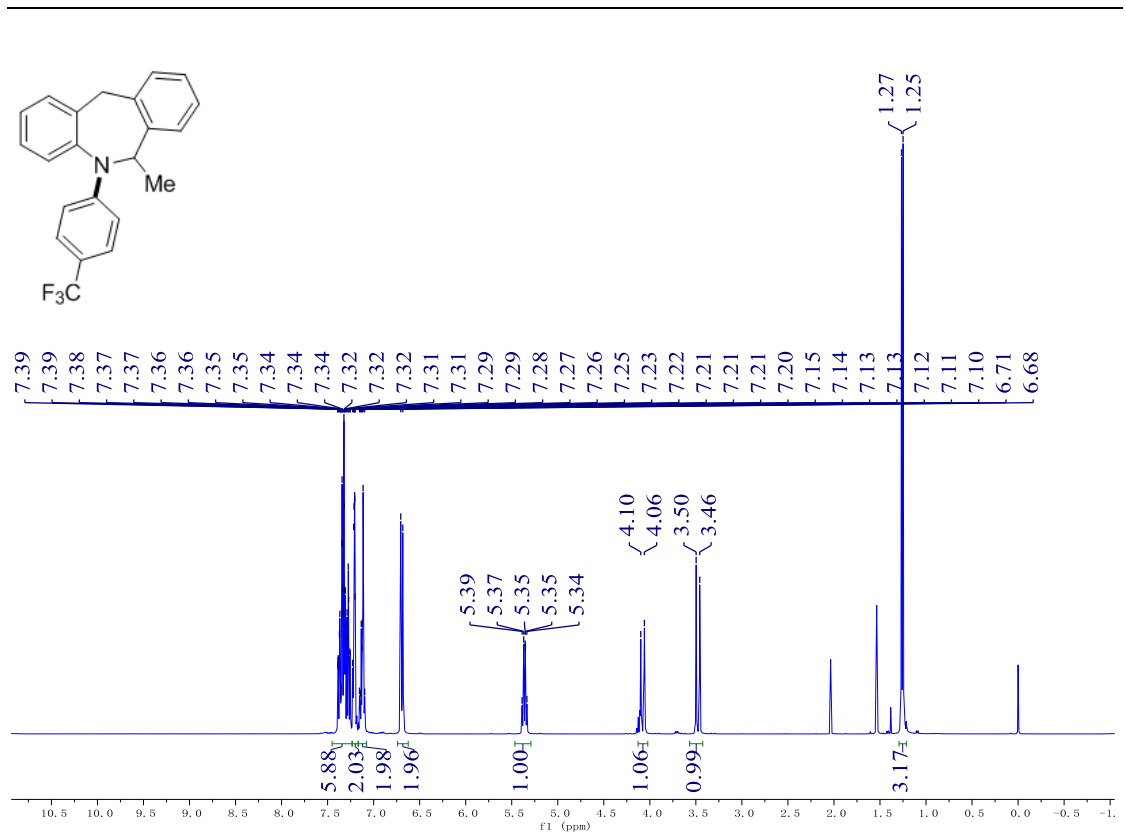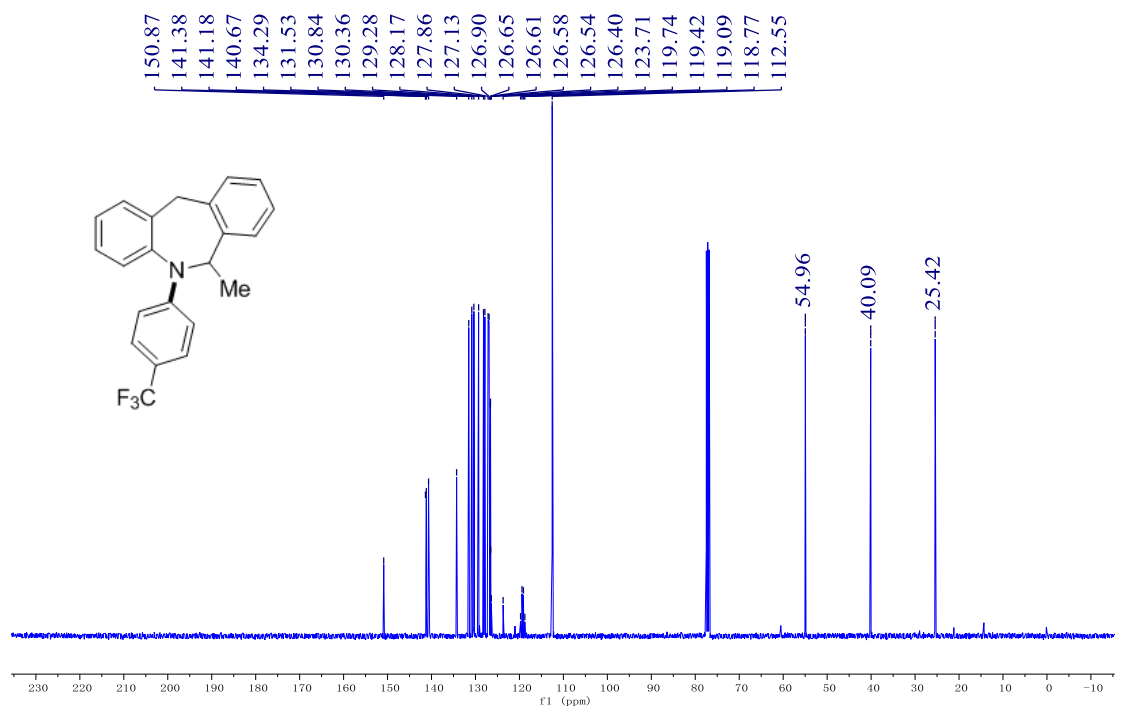

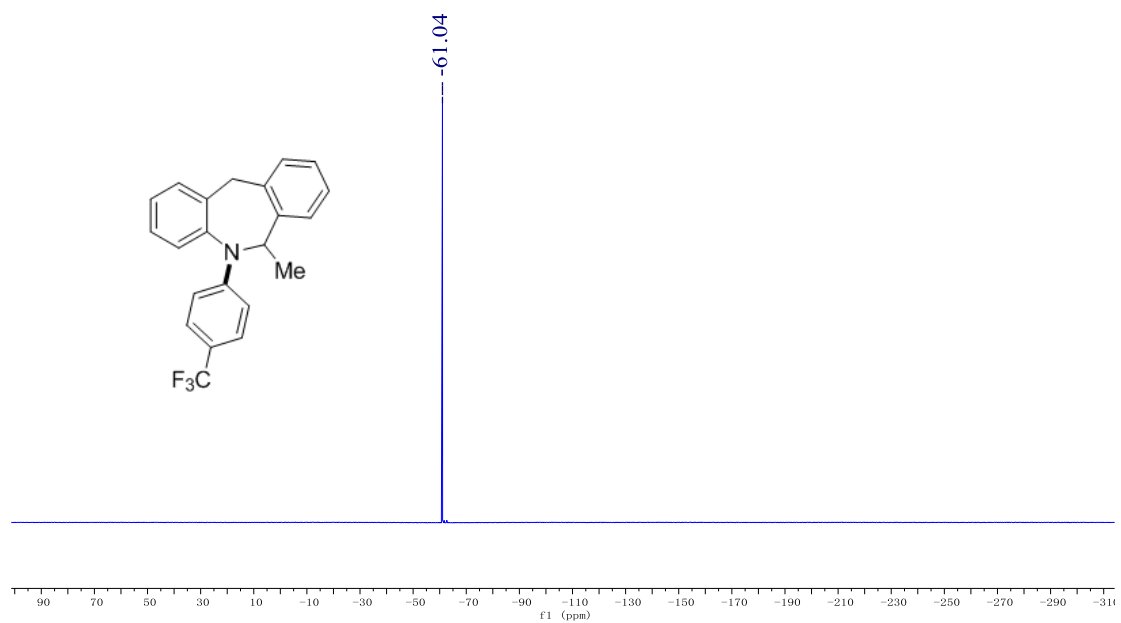

**3e**

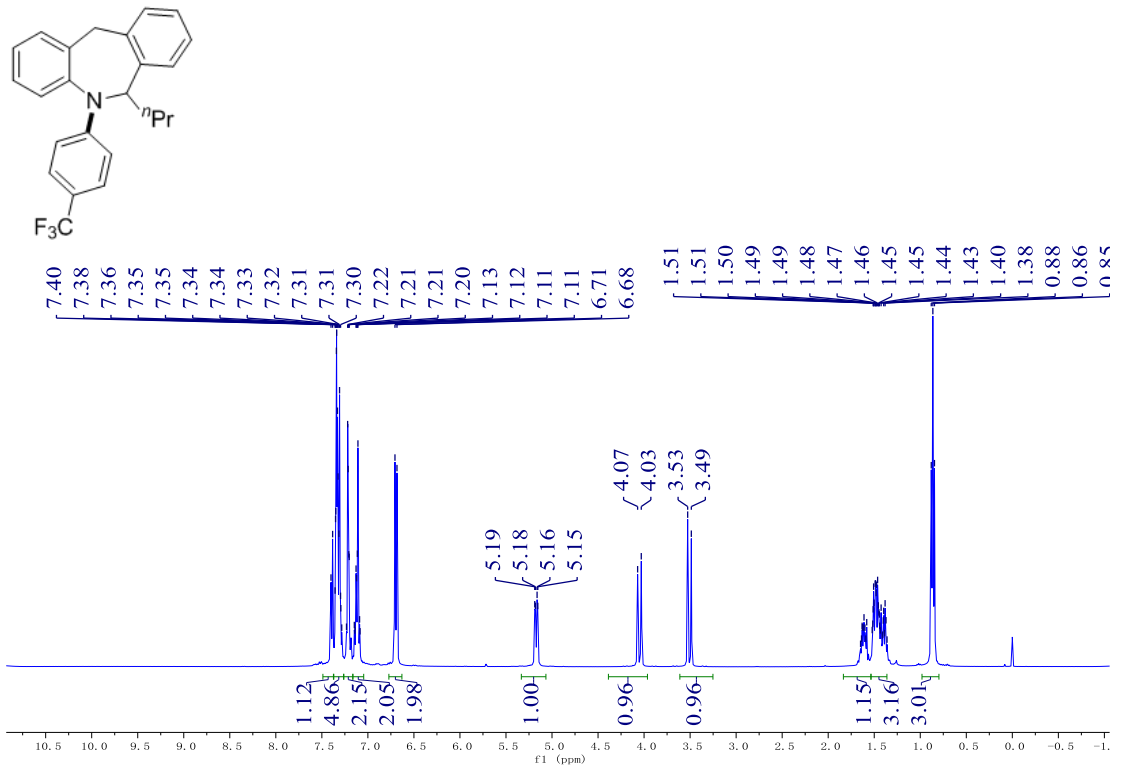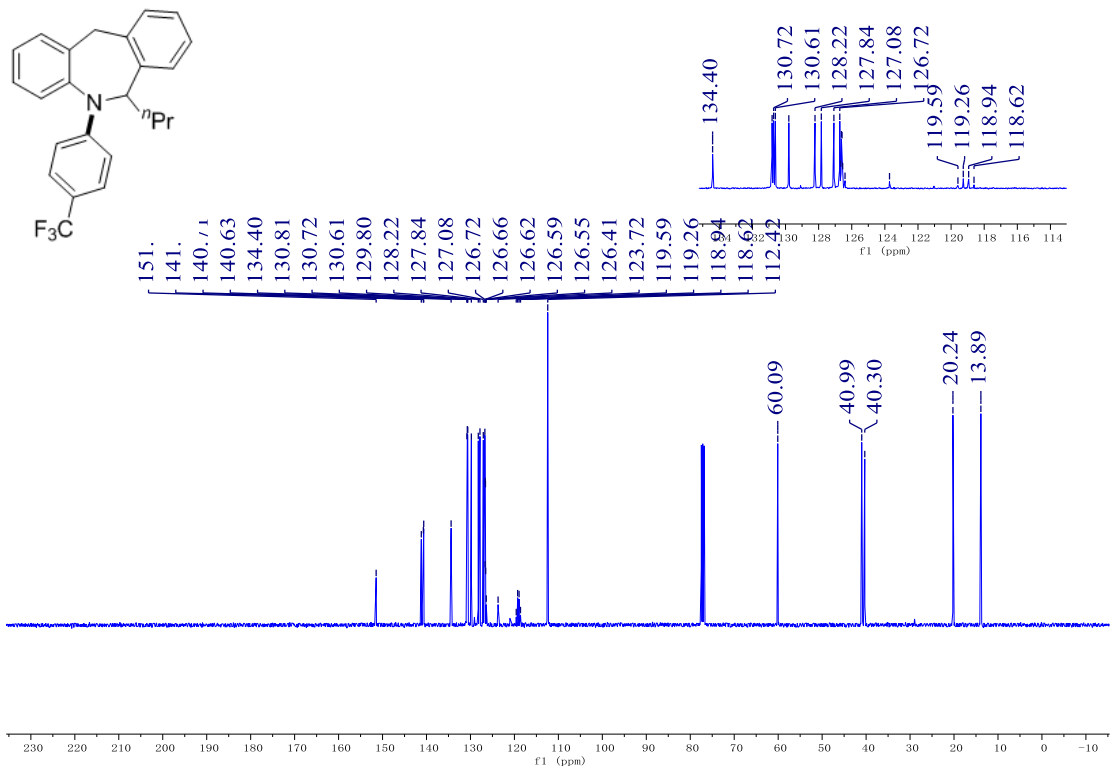

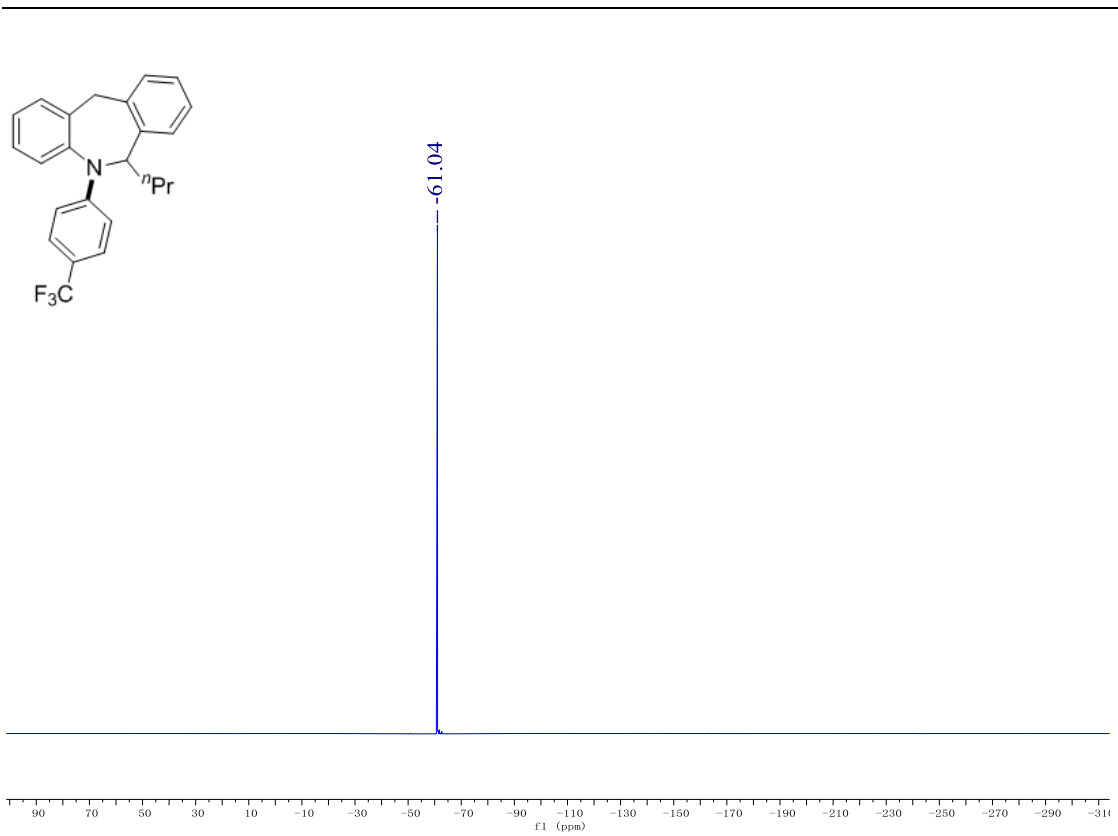

3f

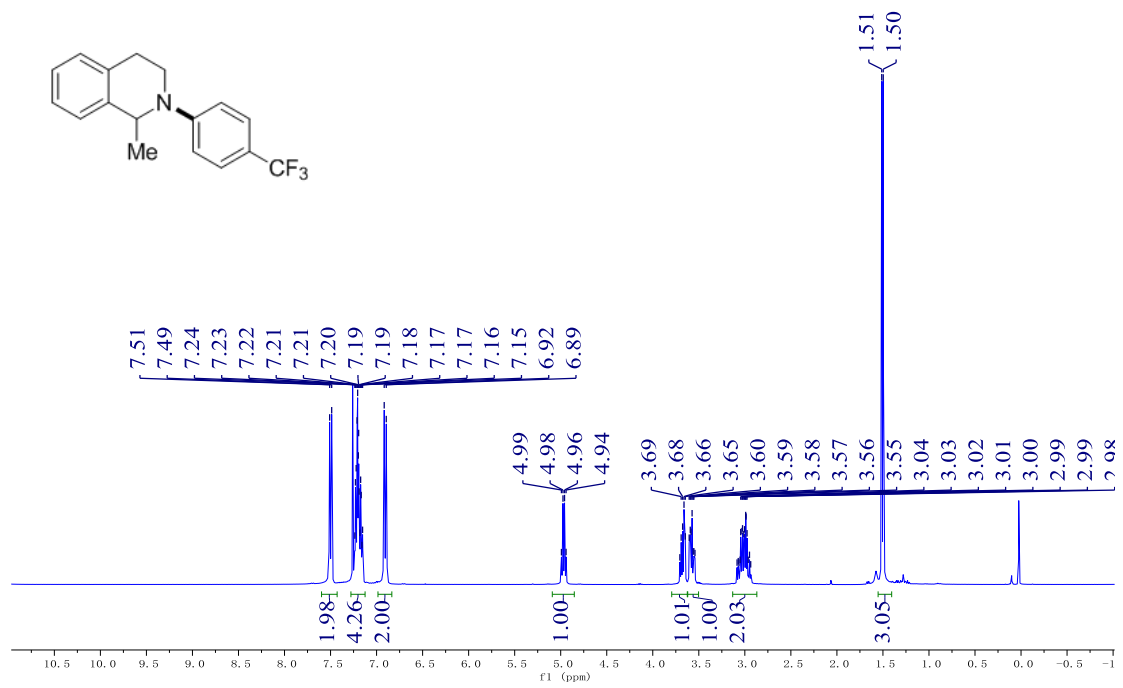

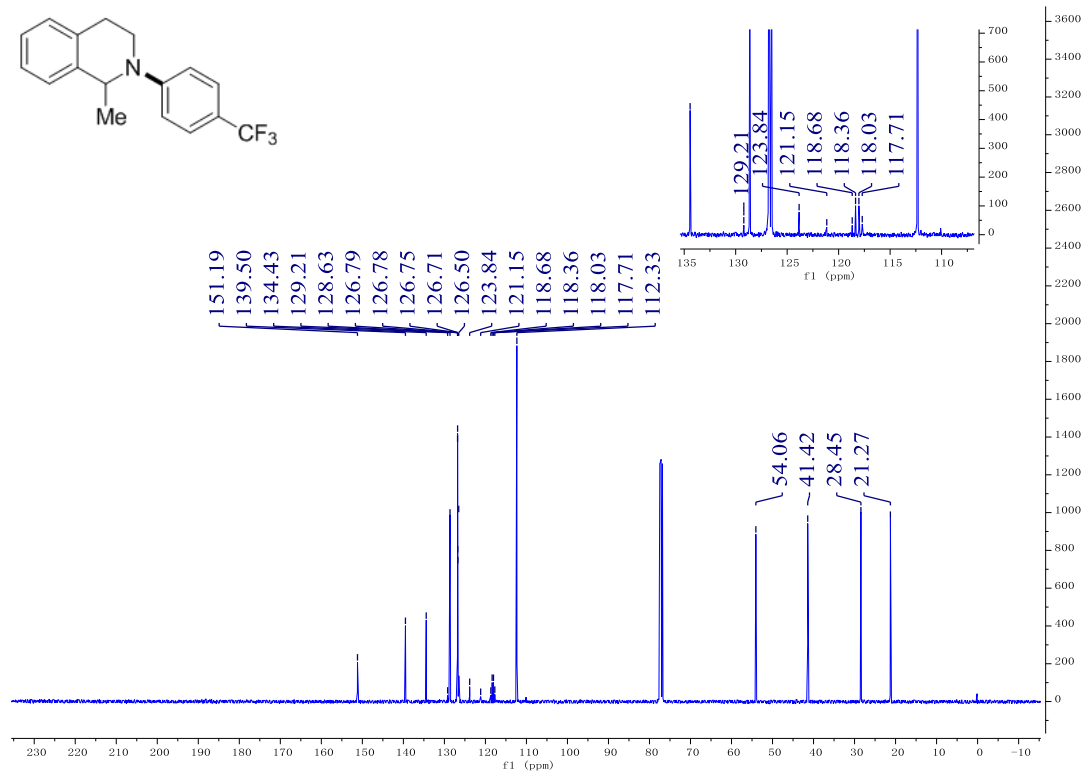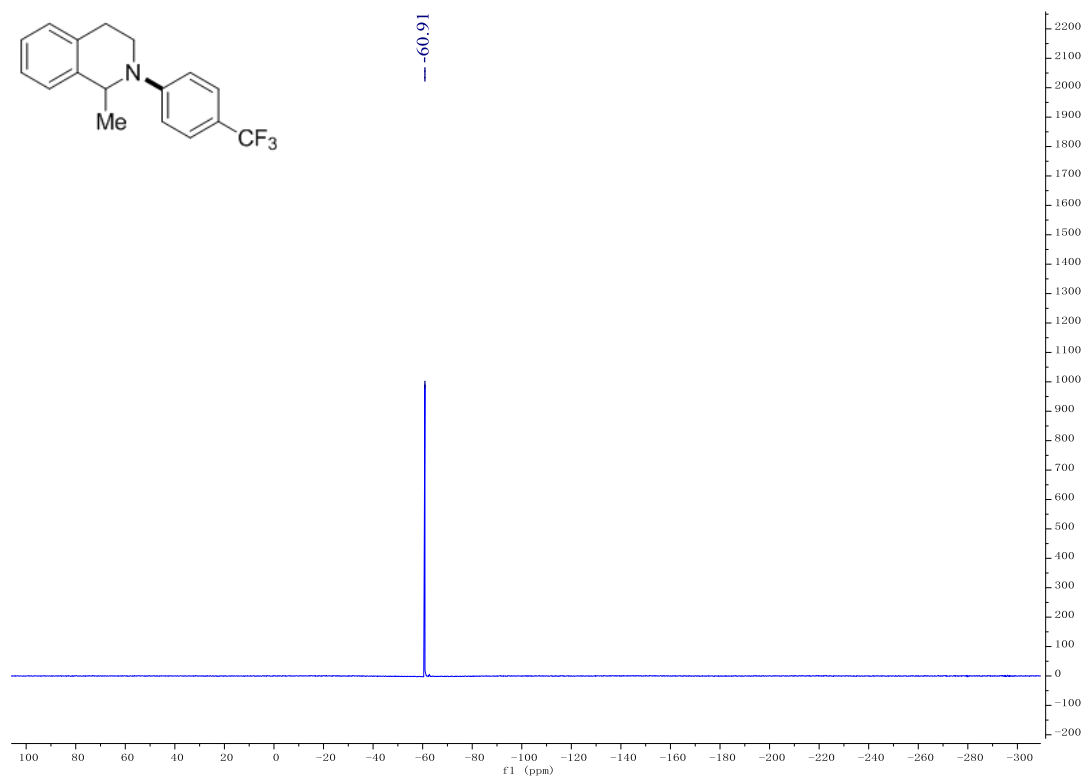

3g

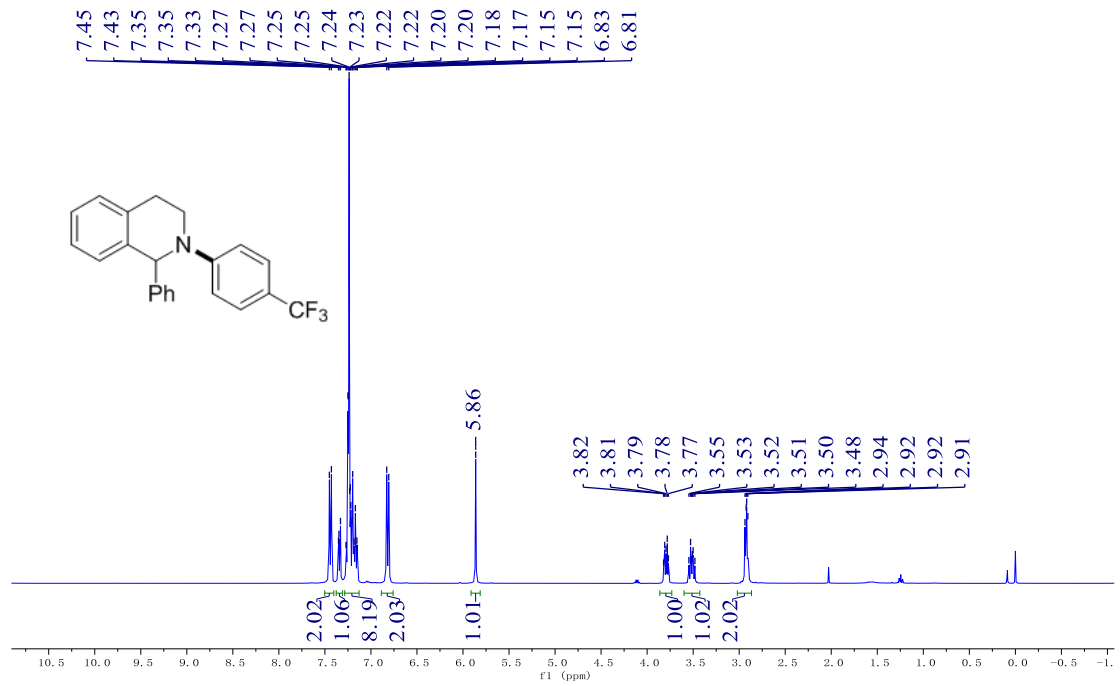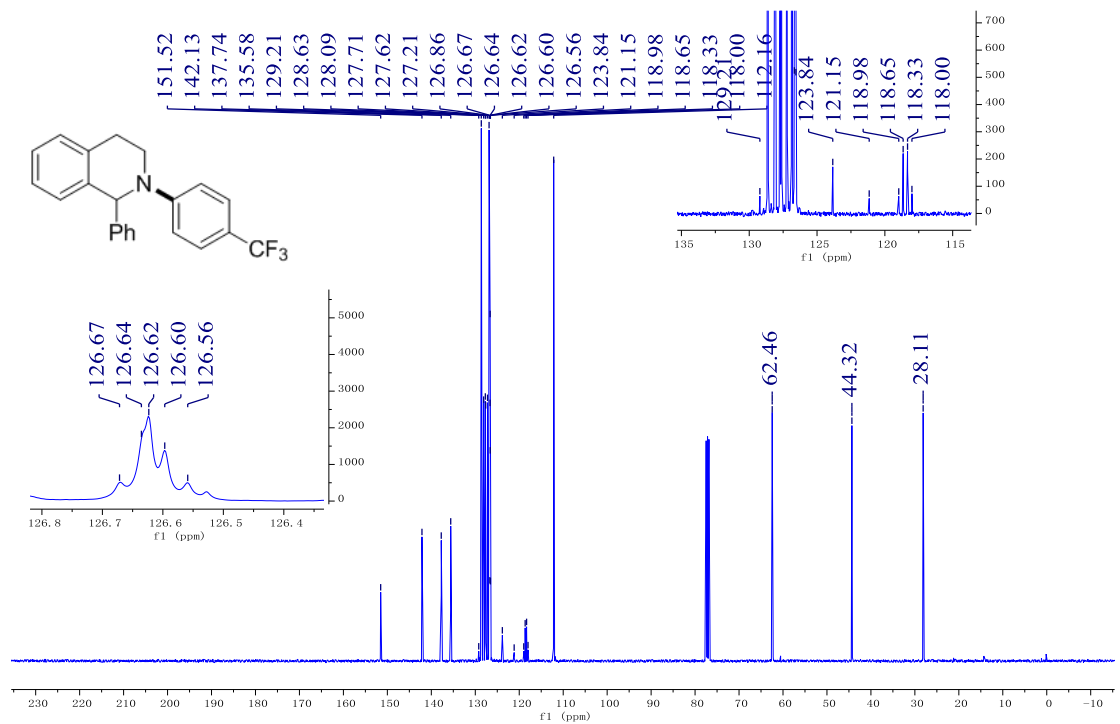

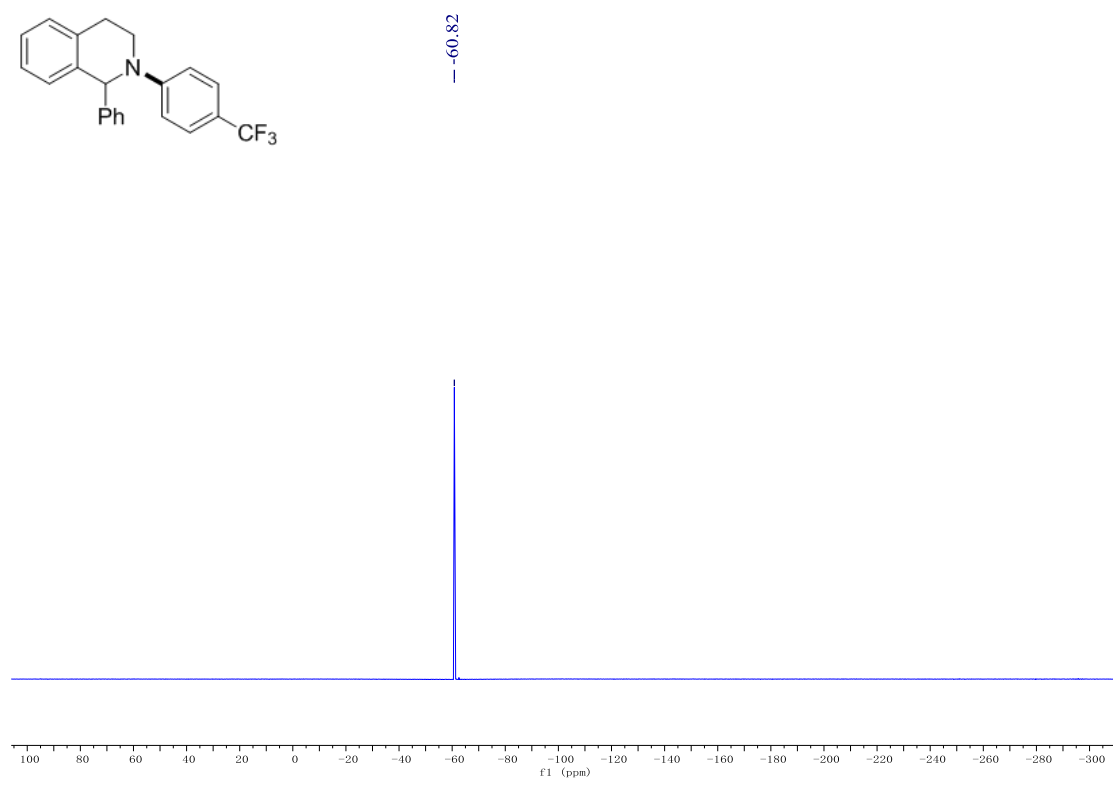

**3h**

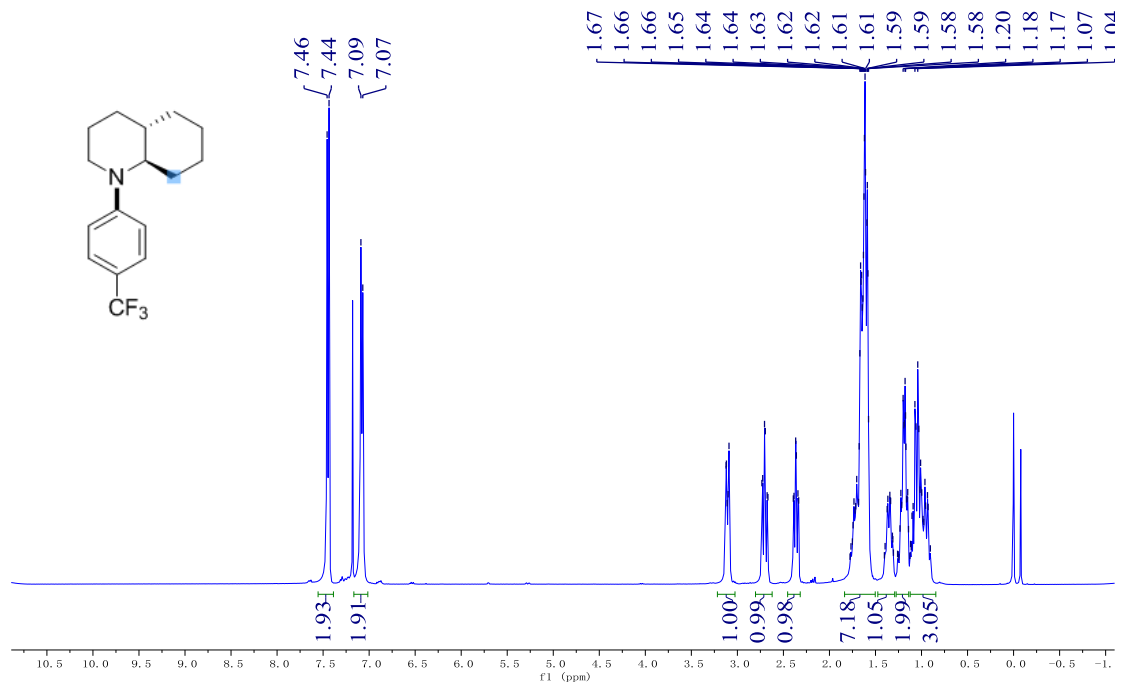



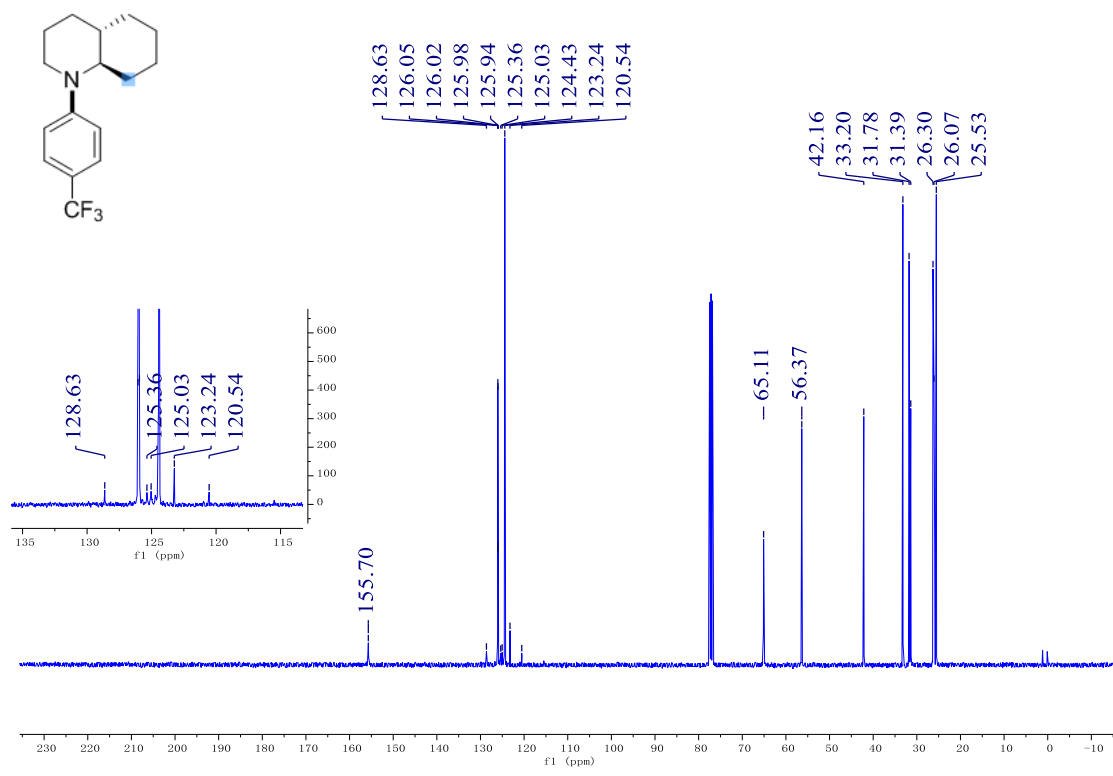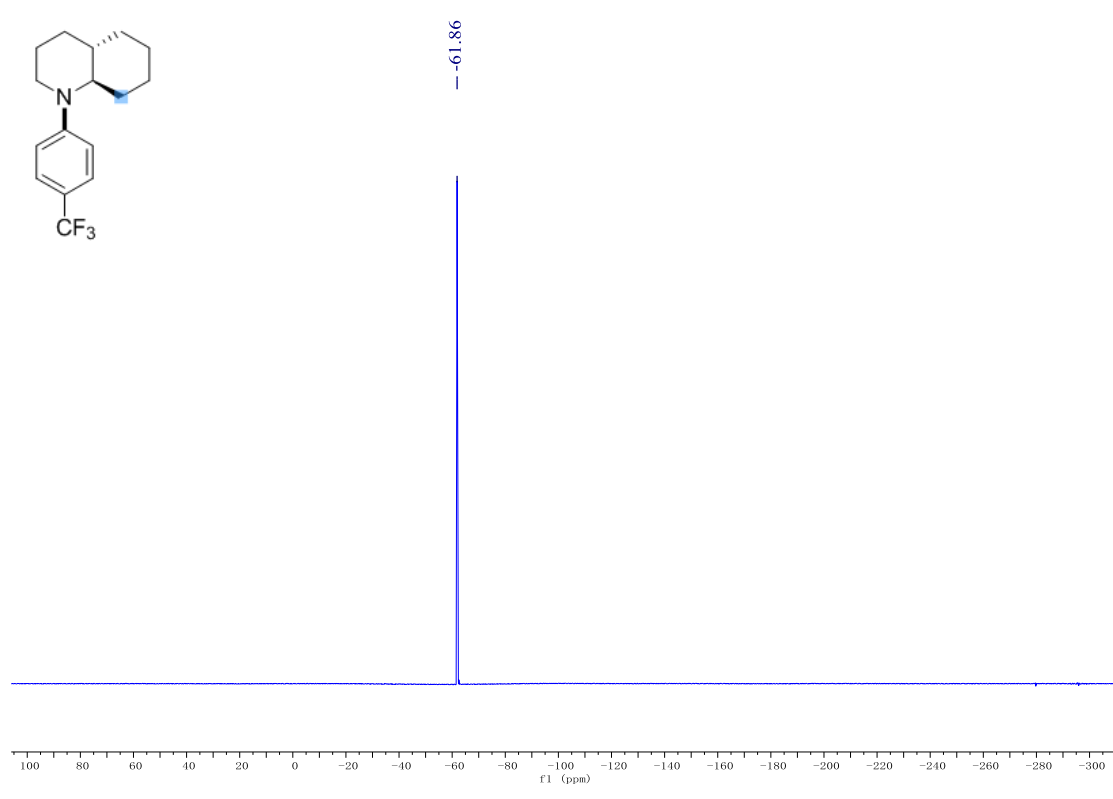

3i

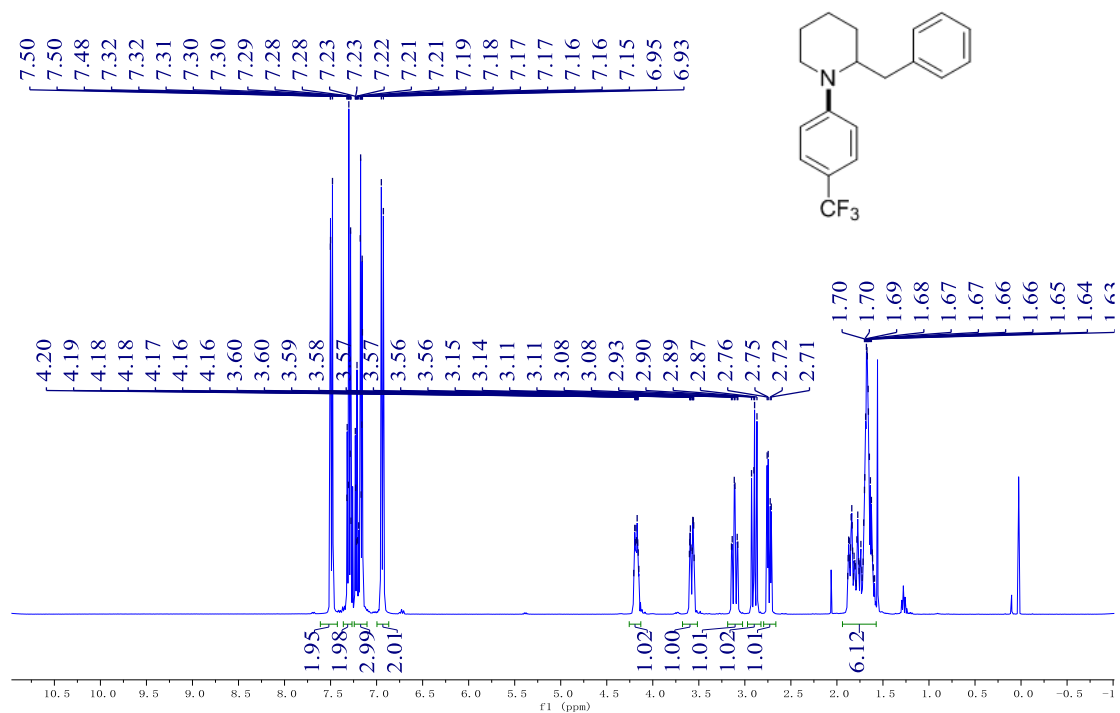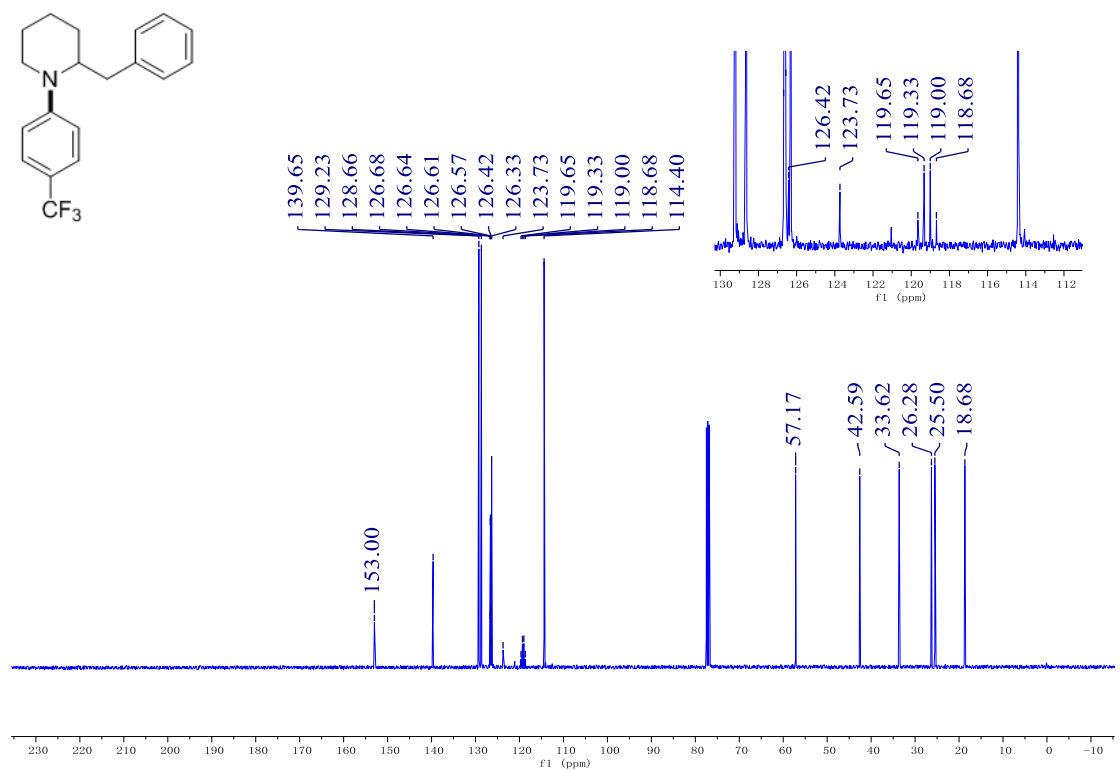

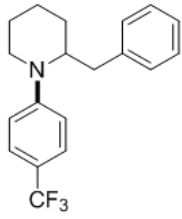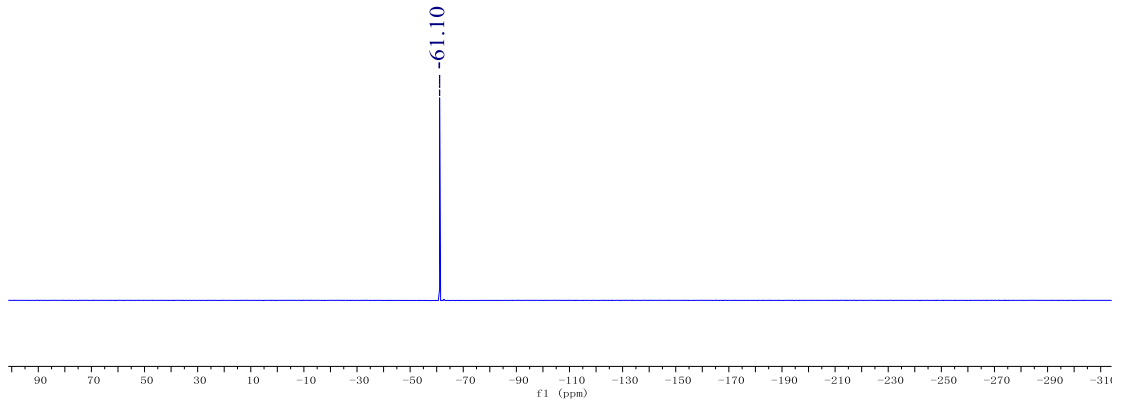

3j

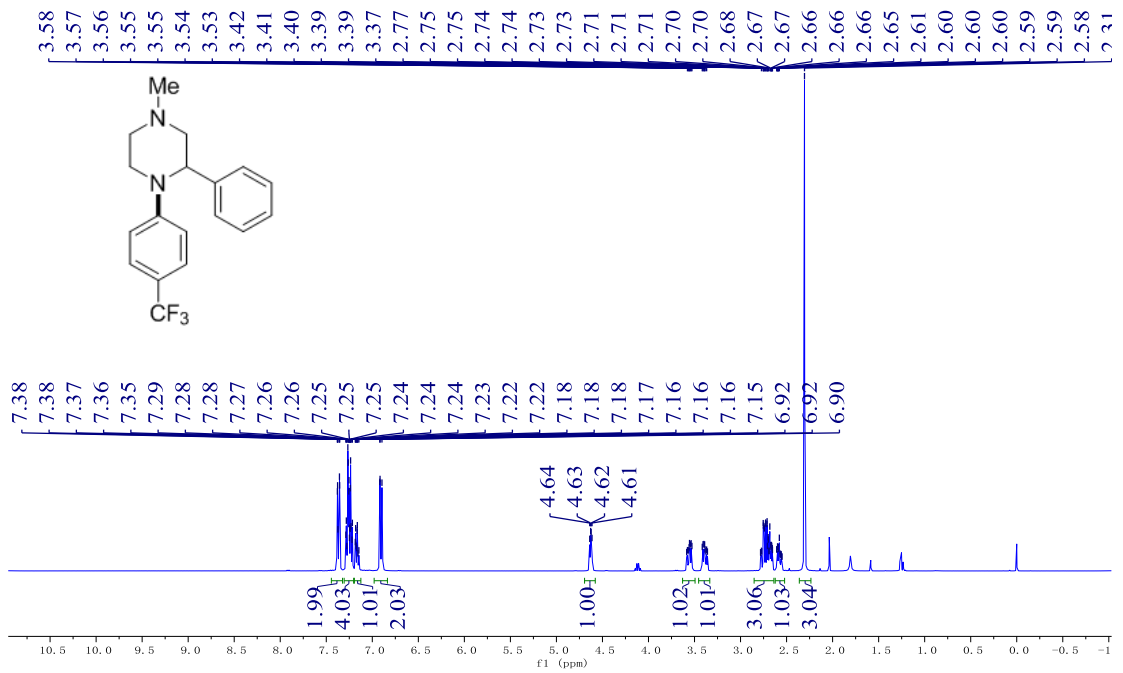

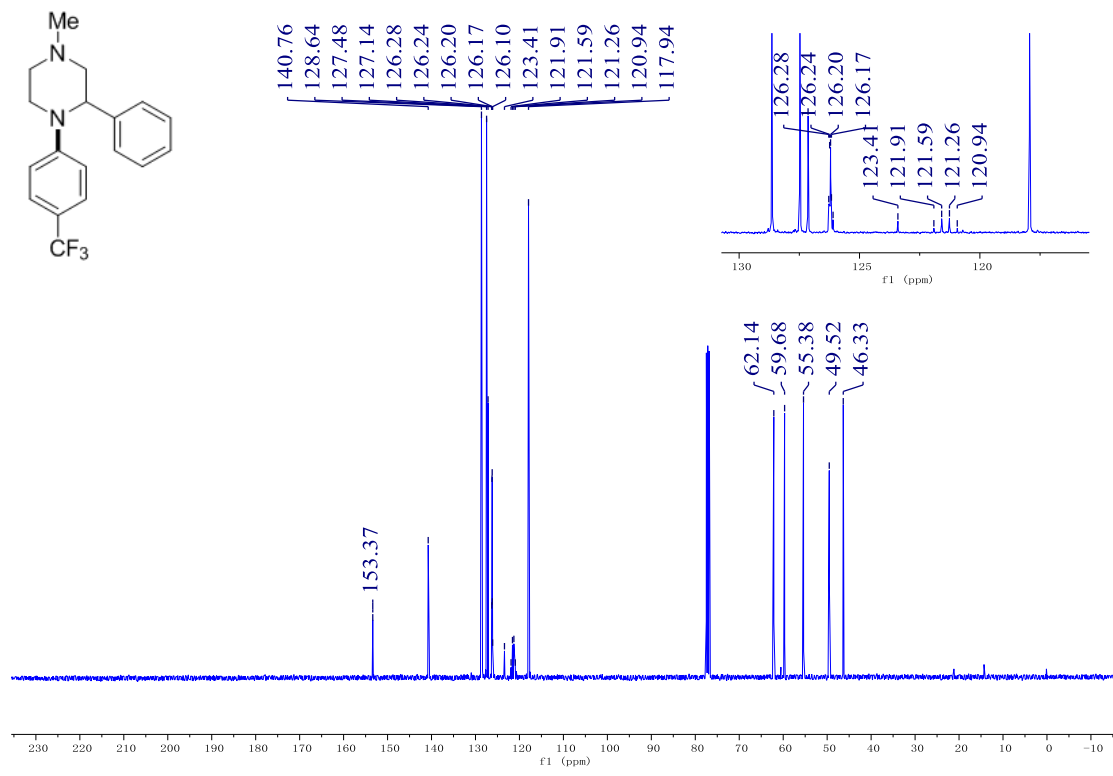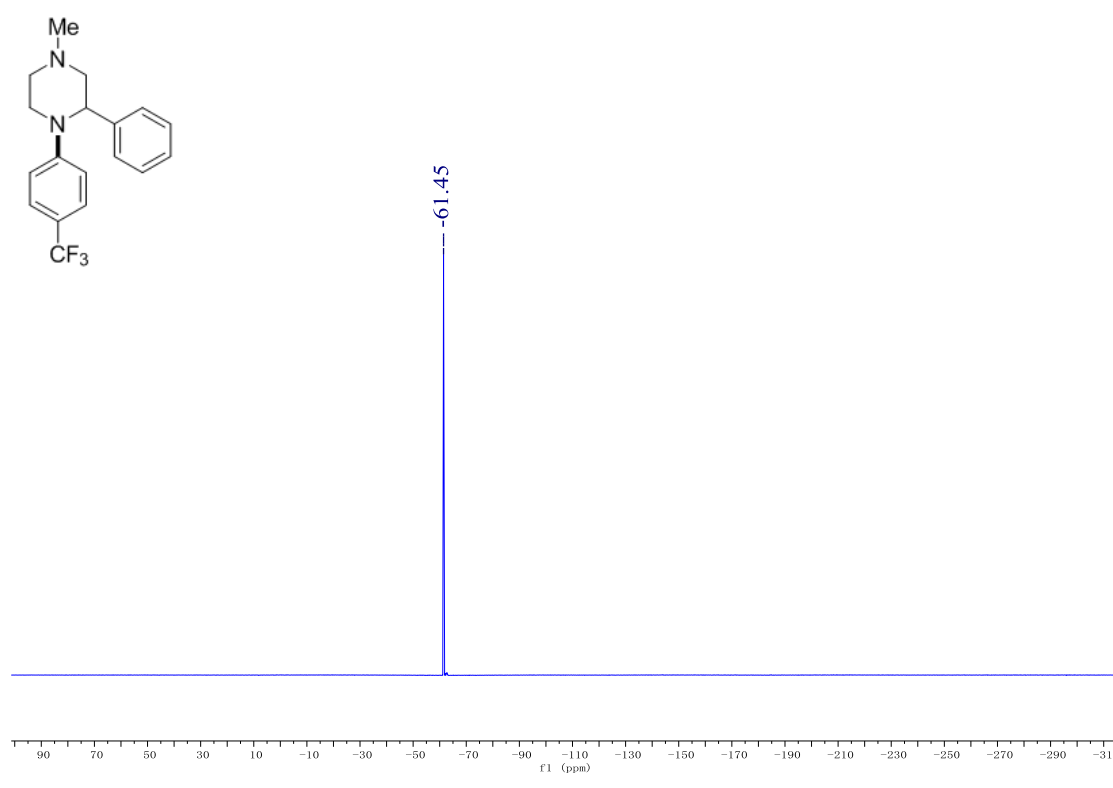

3k

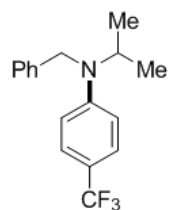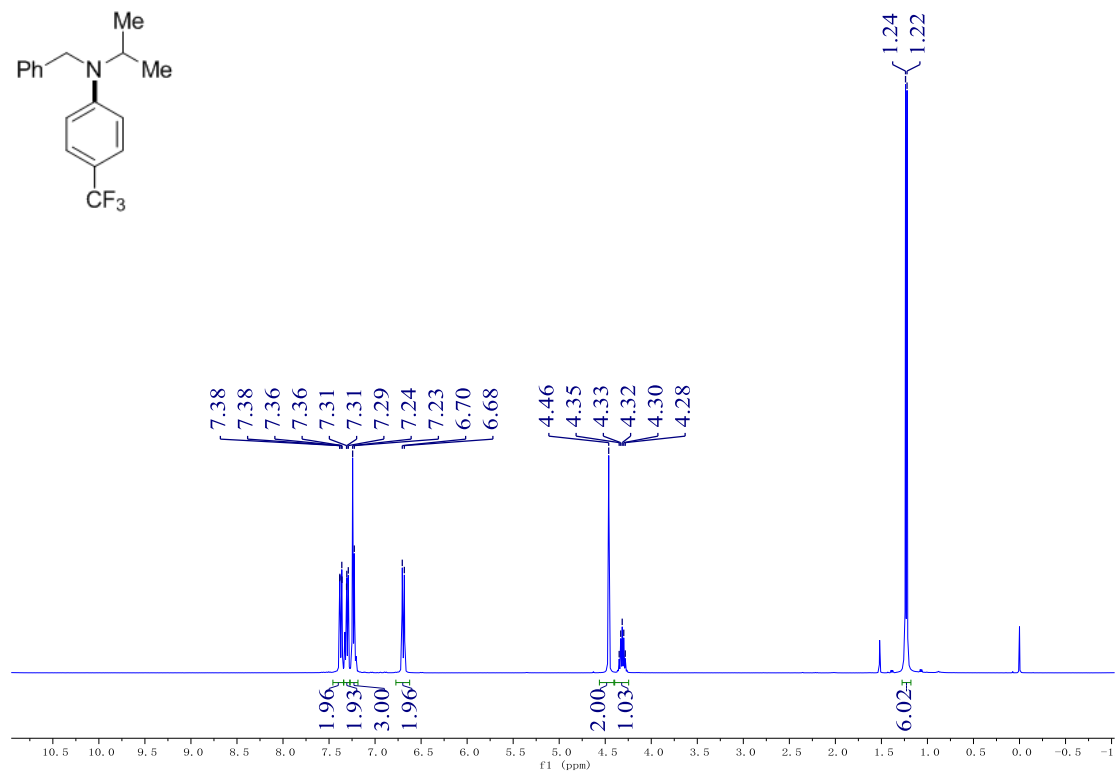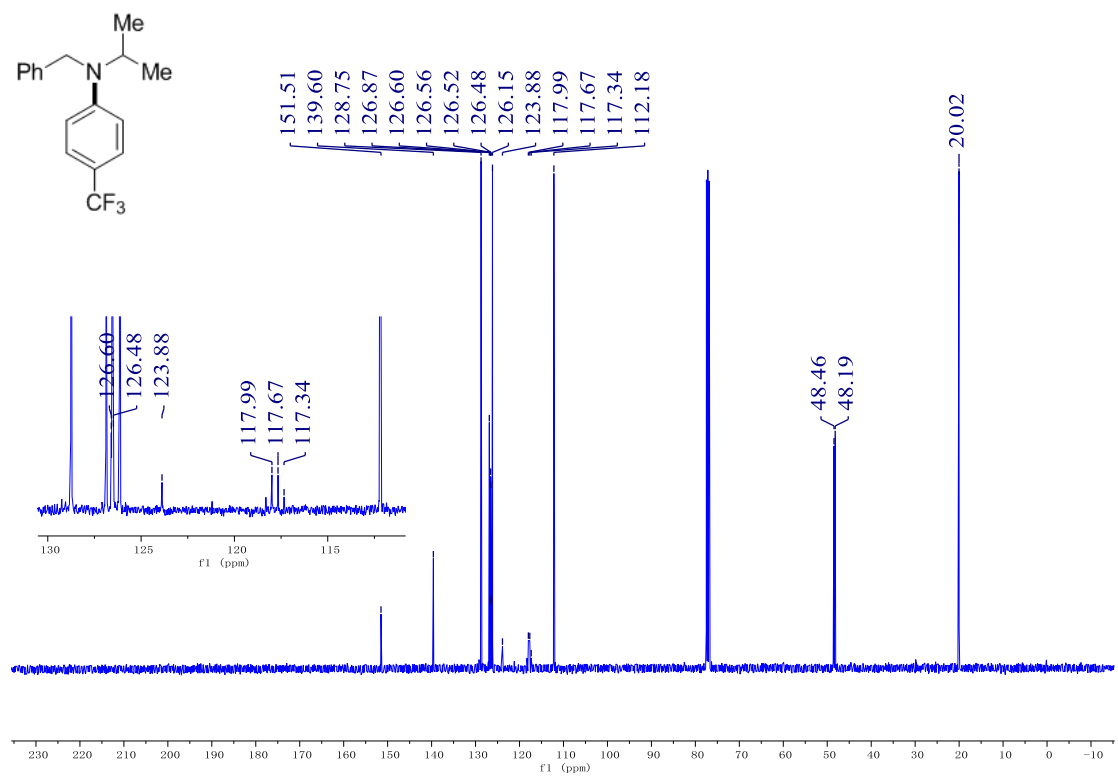

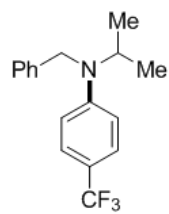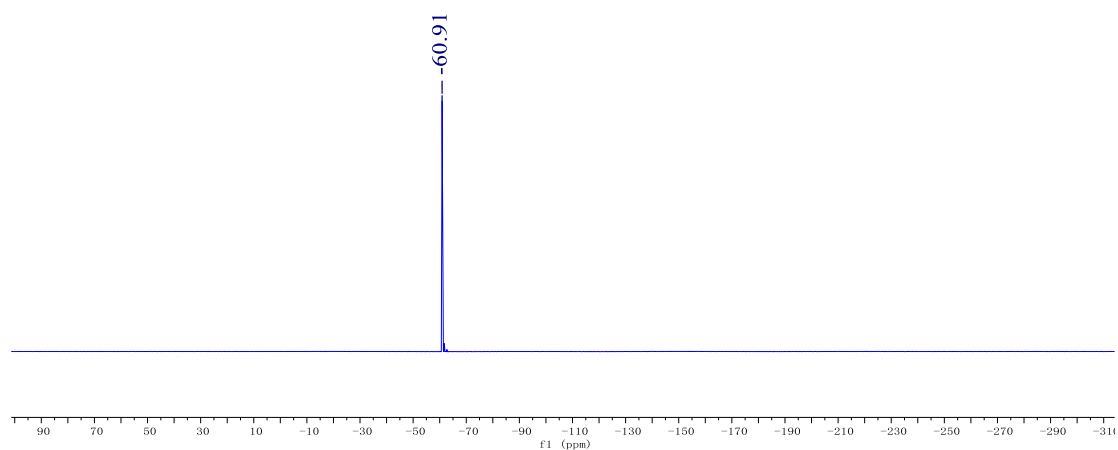

31

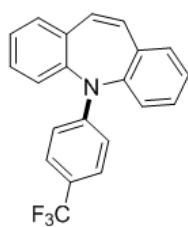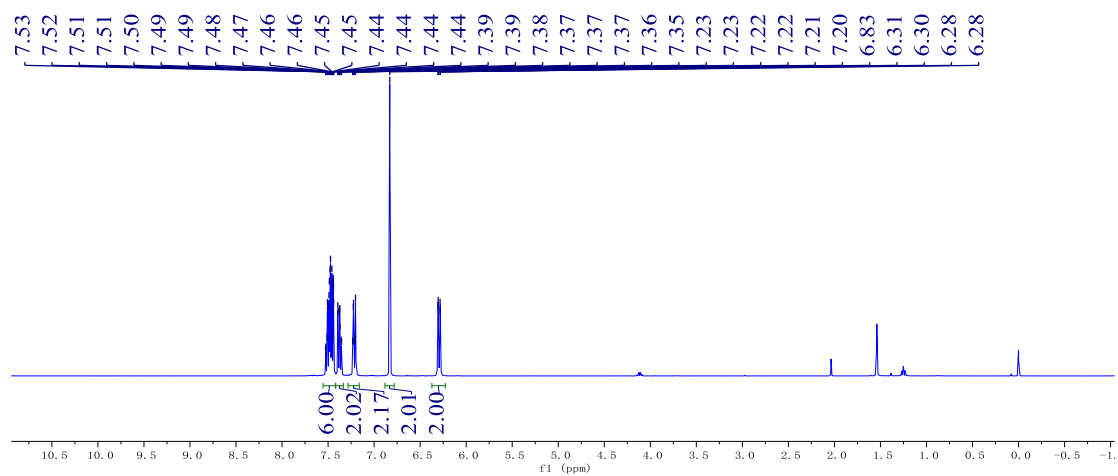

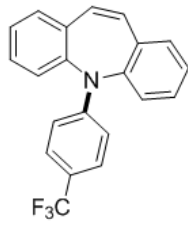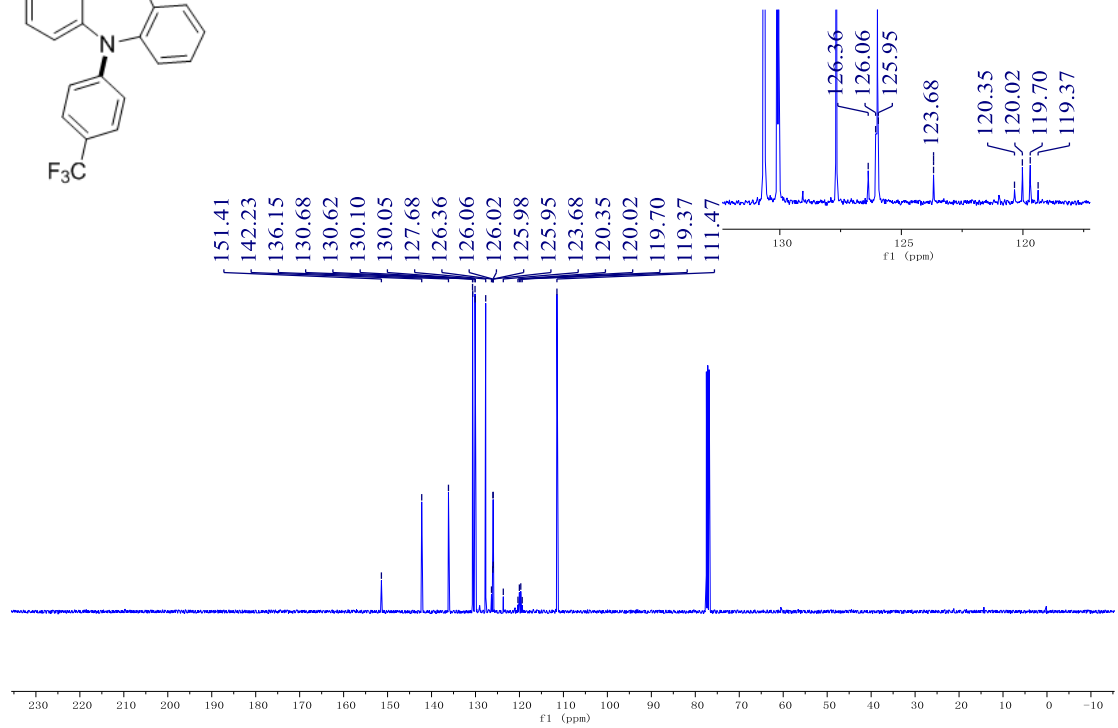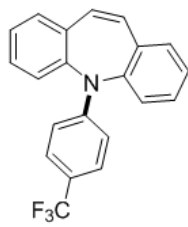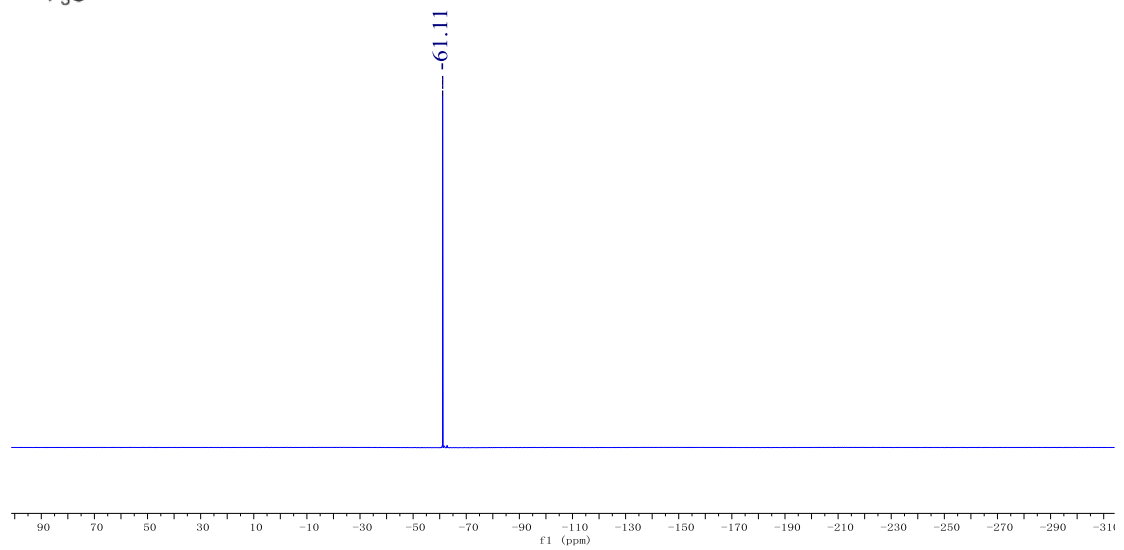

3m

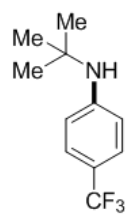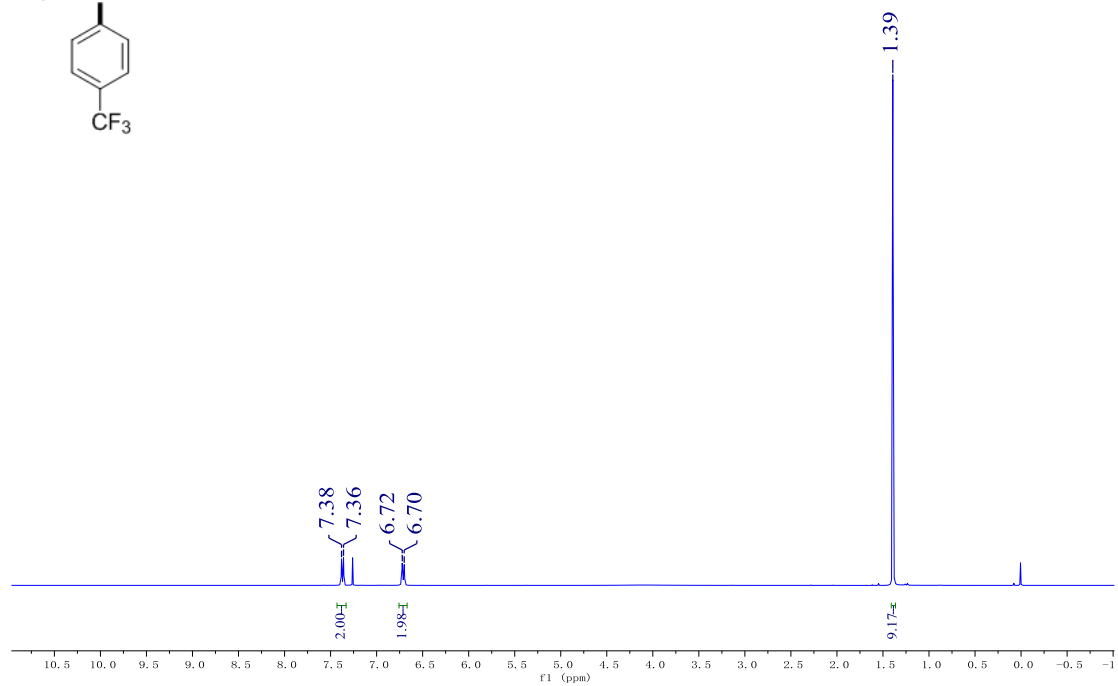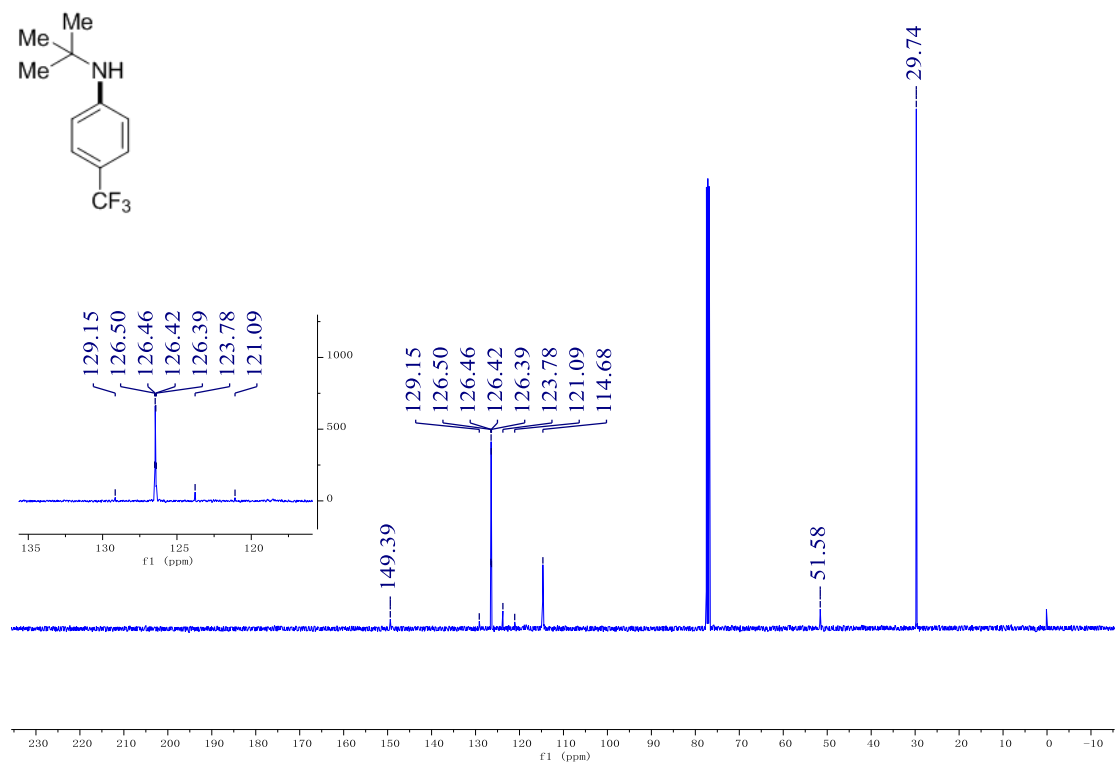



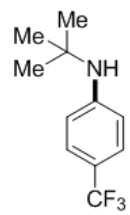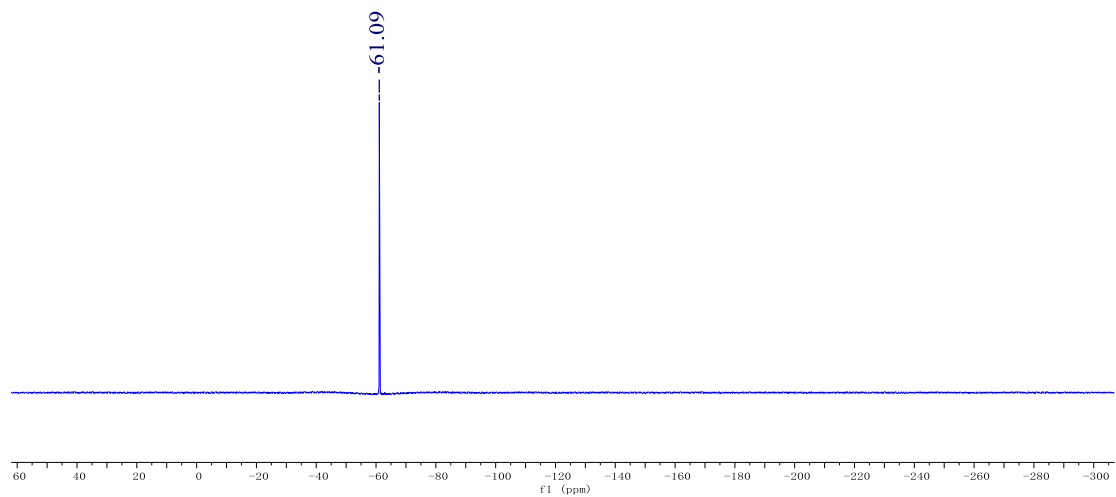

### 3n

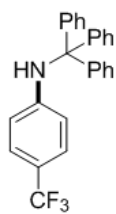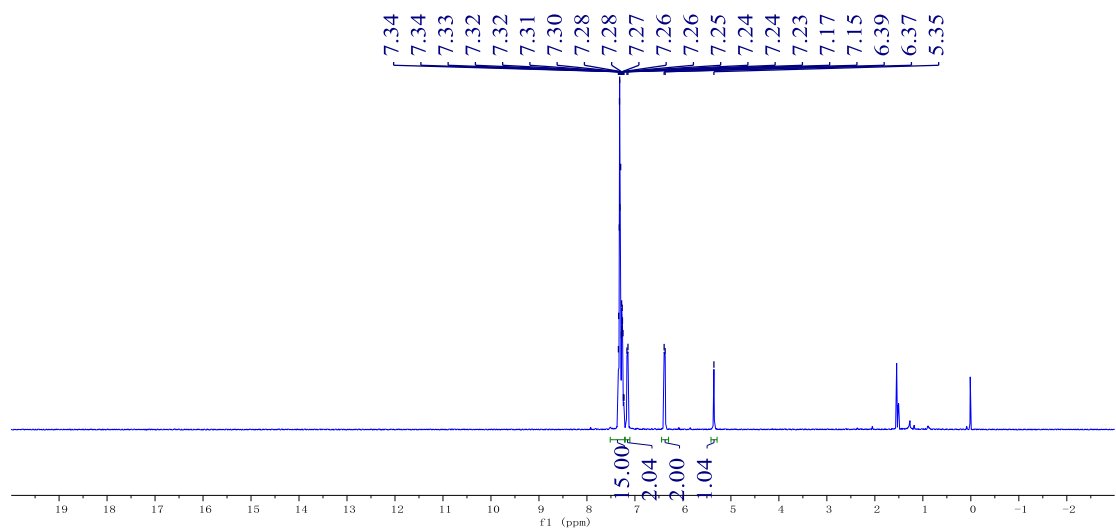

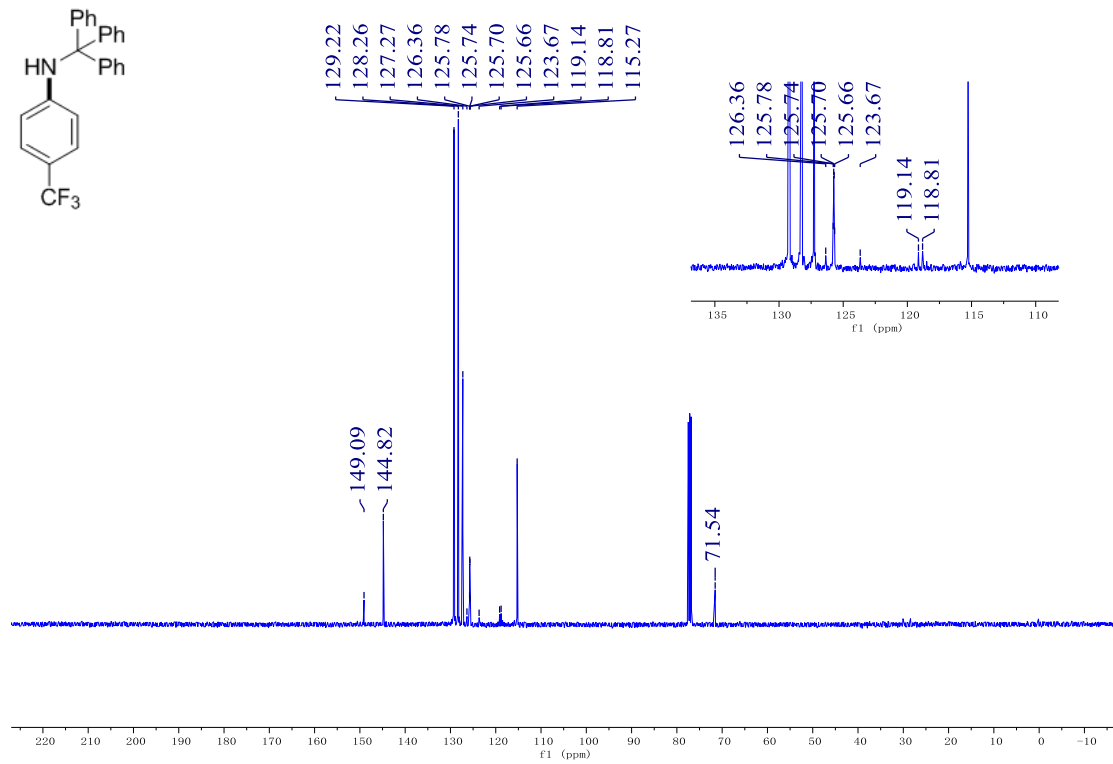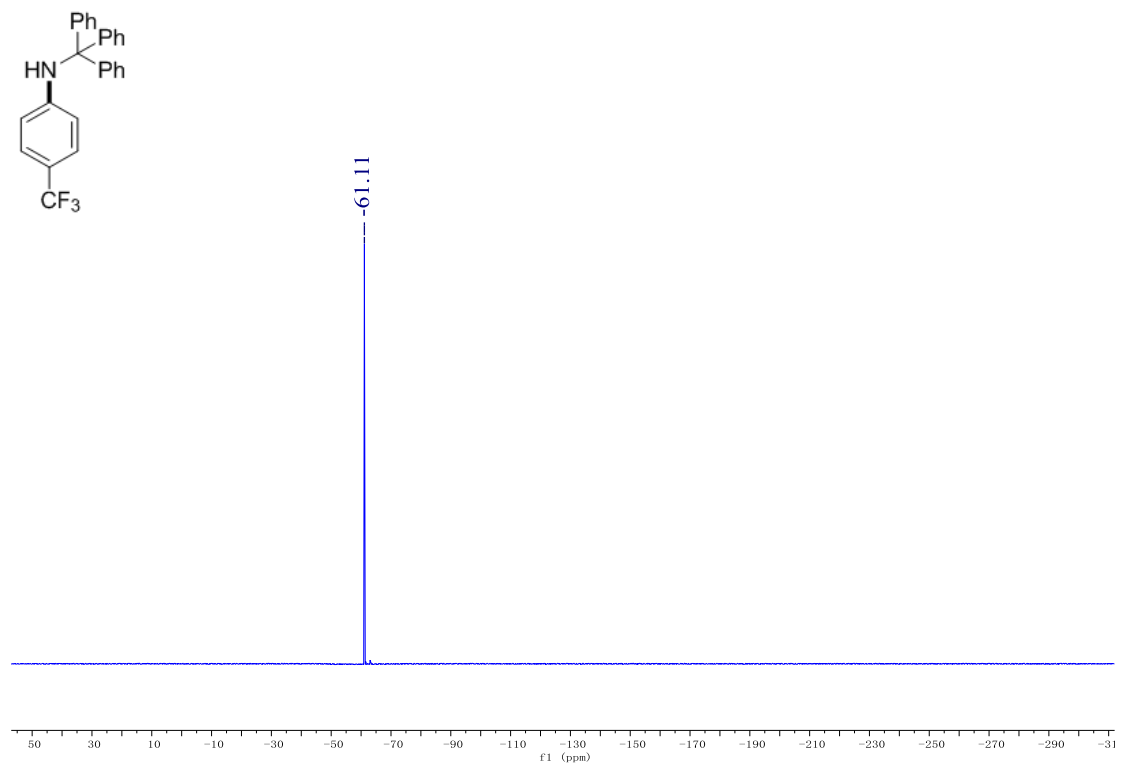

30

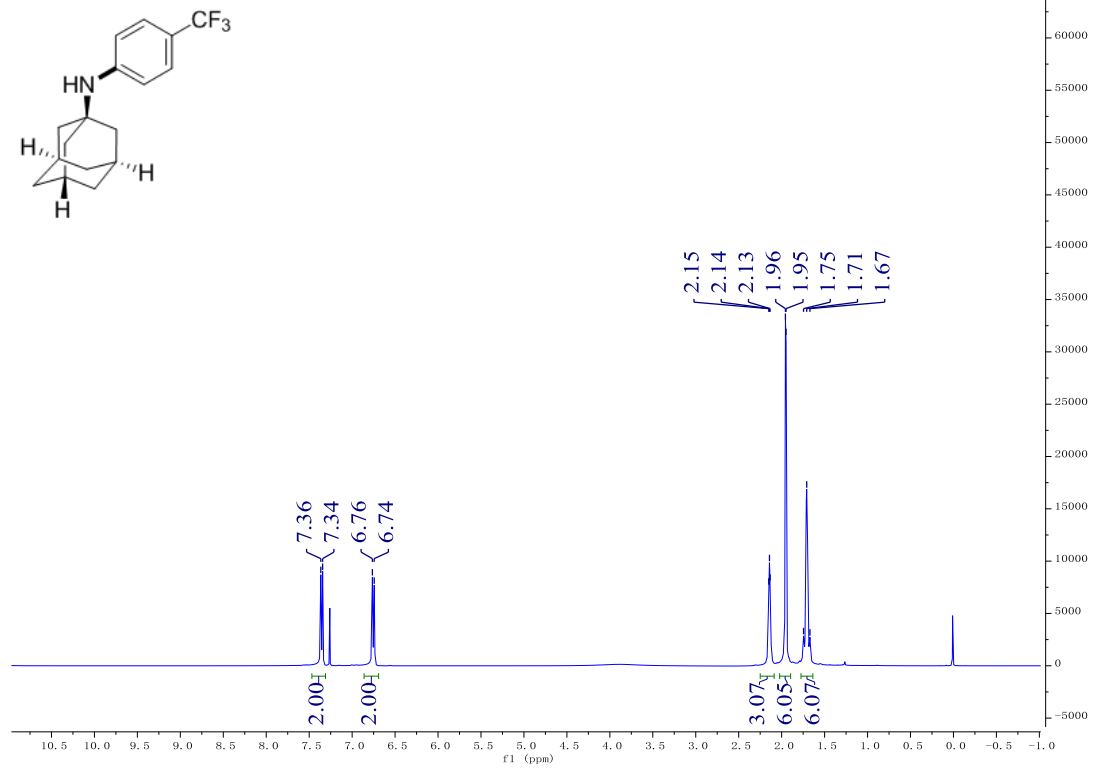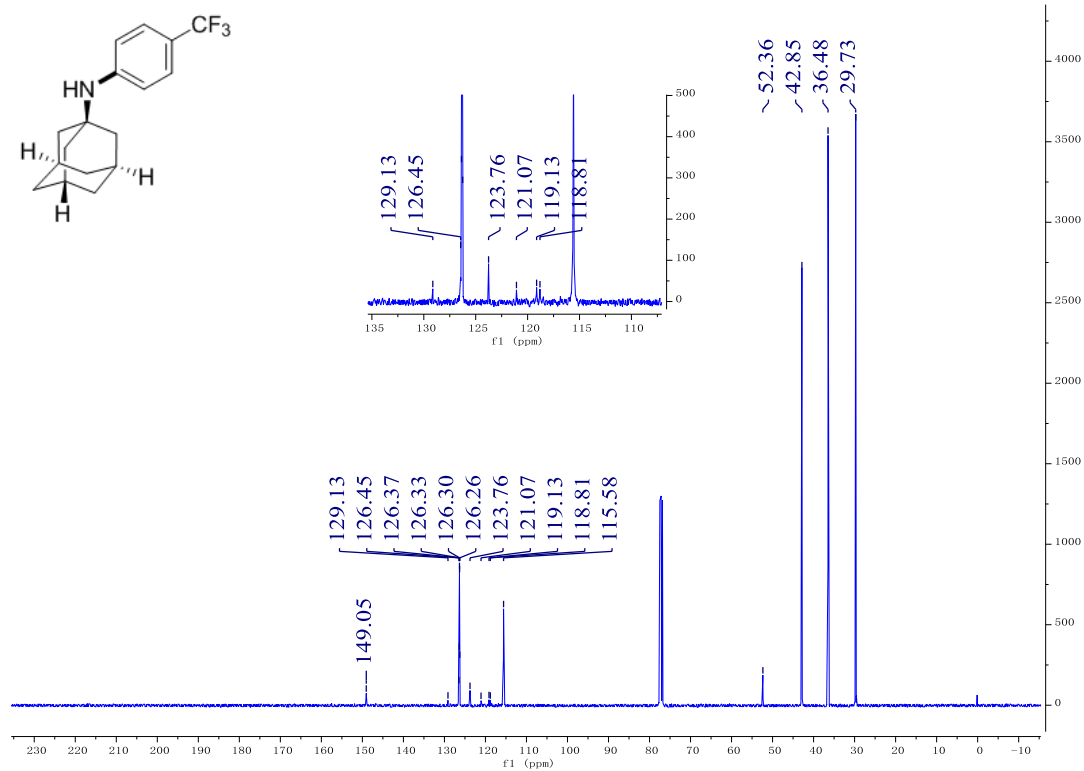

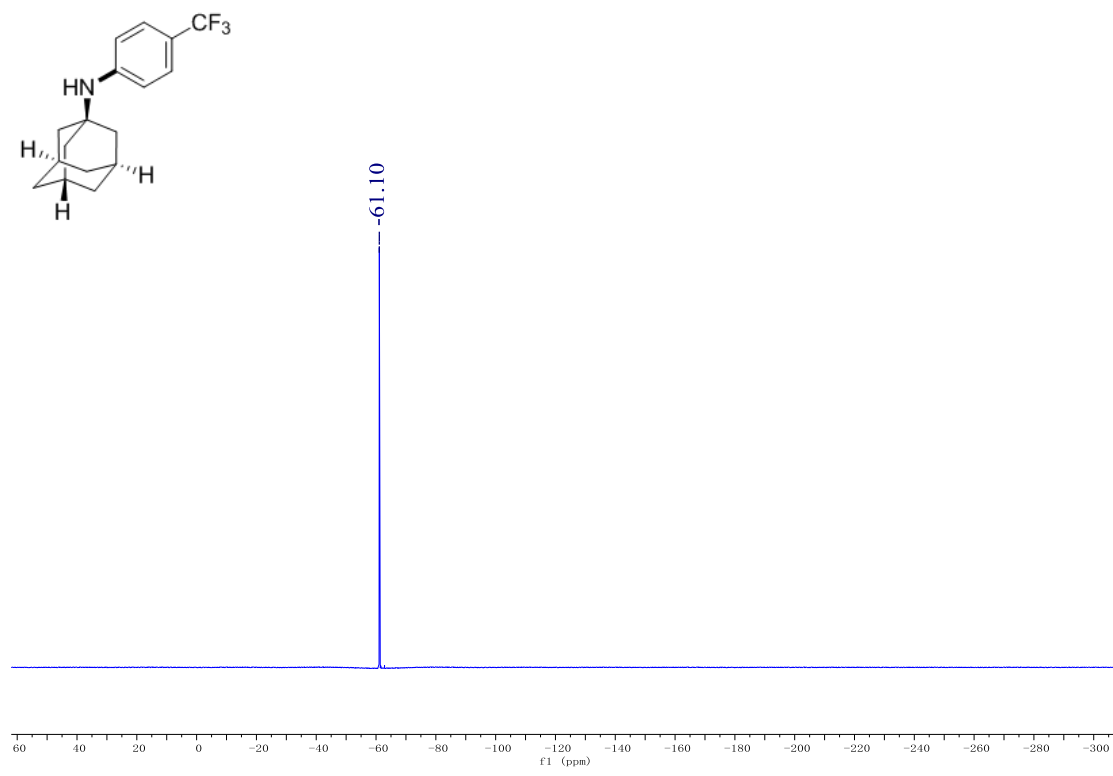

**3p**

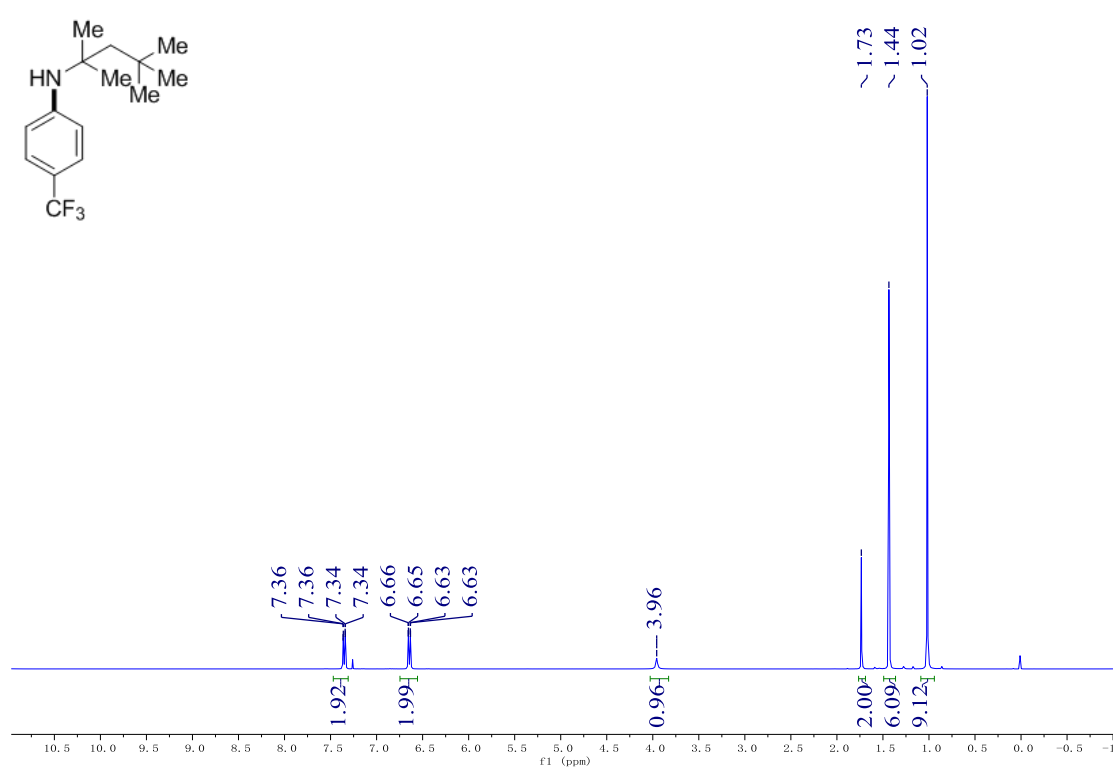

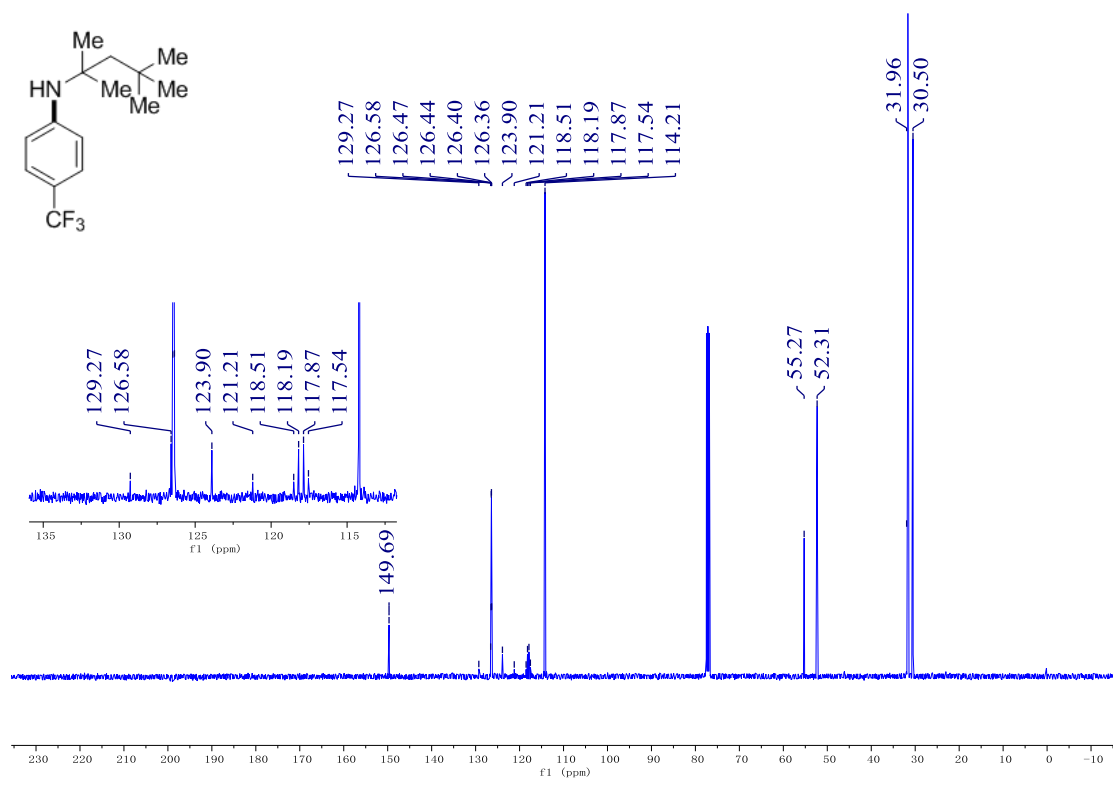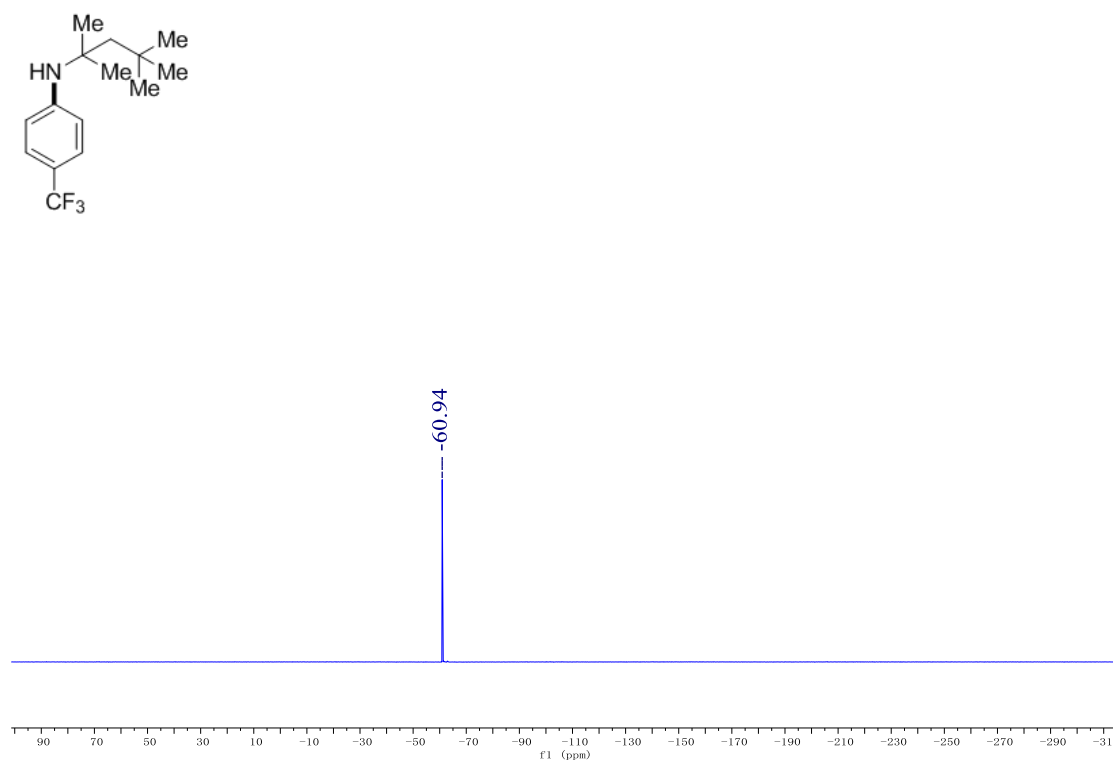

4a

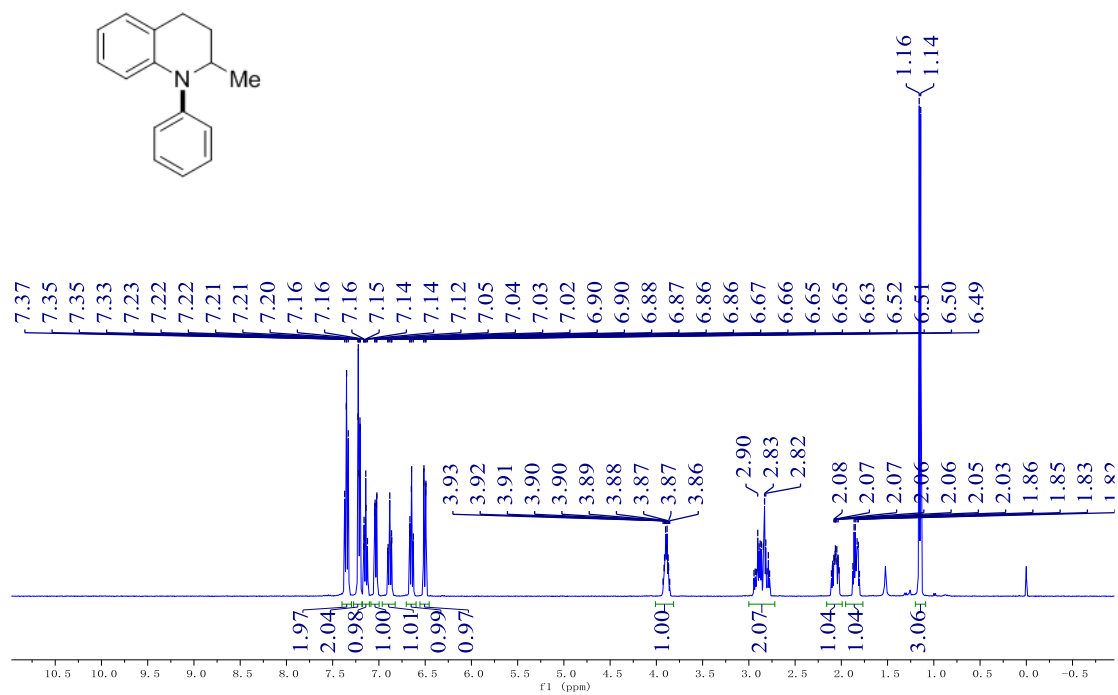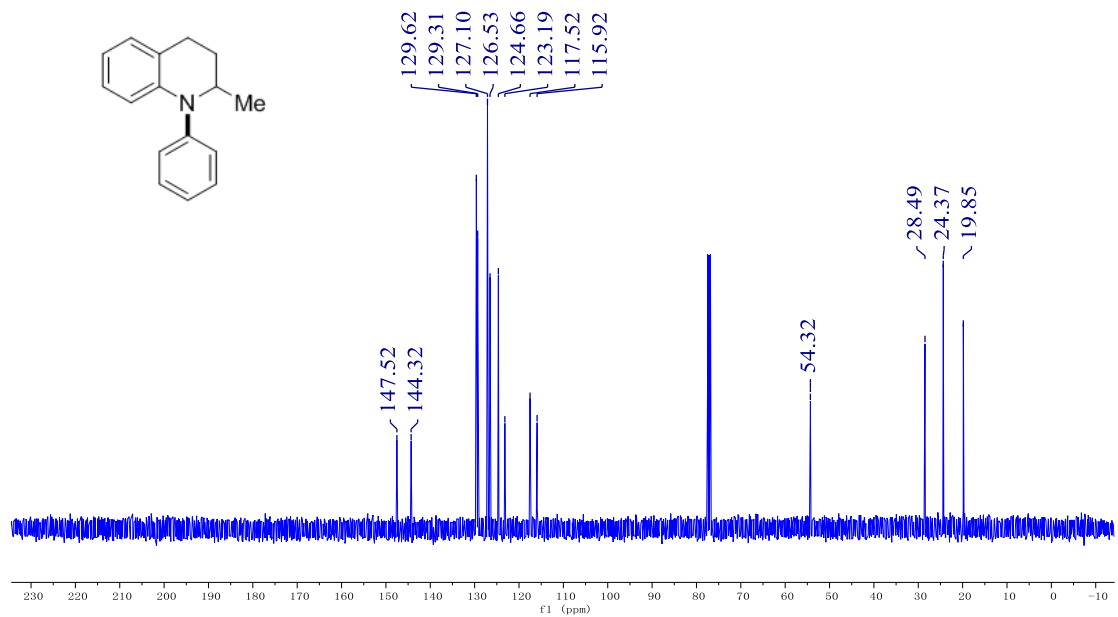

4b

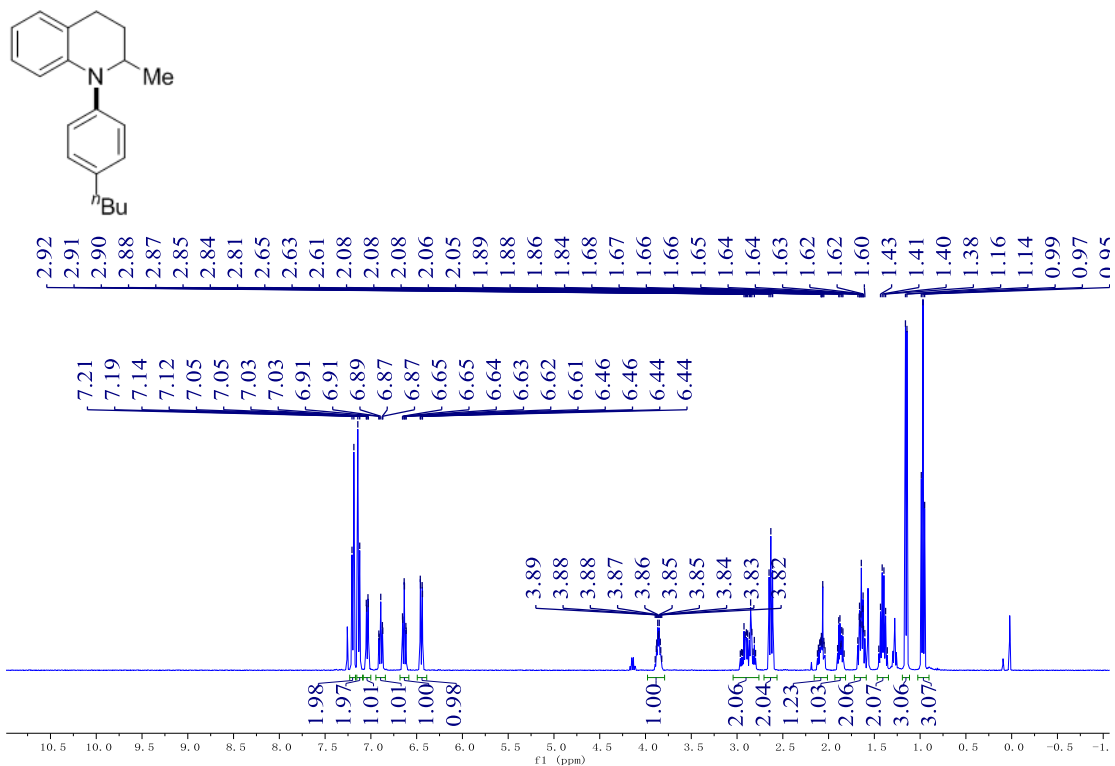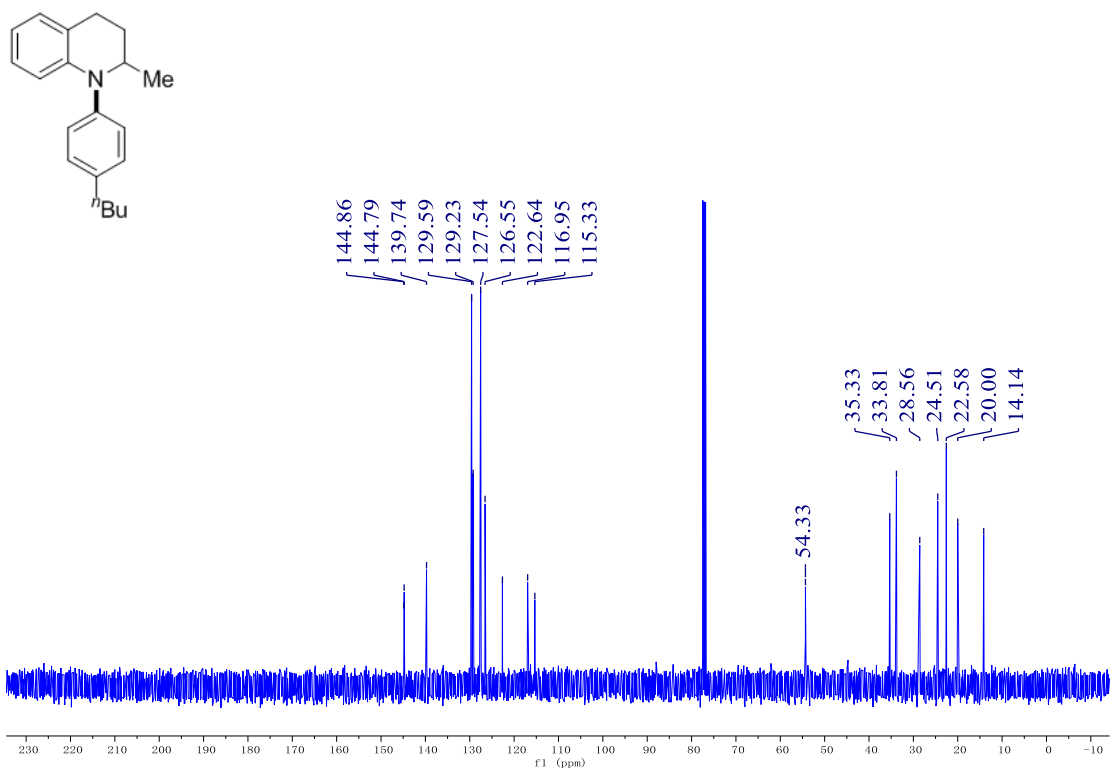

4c

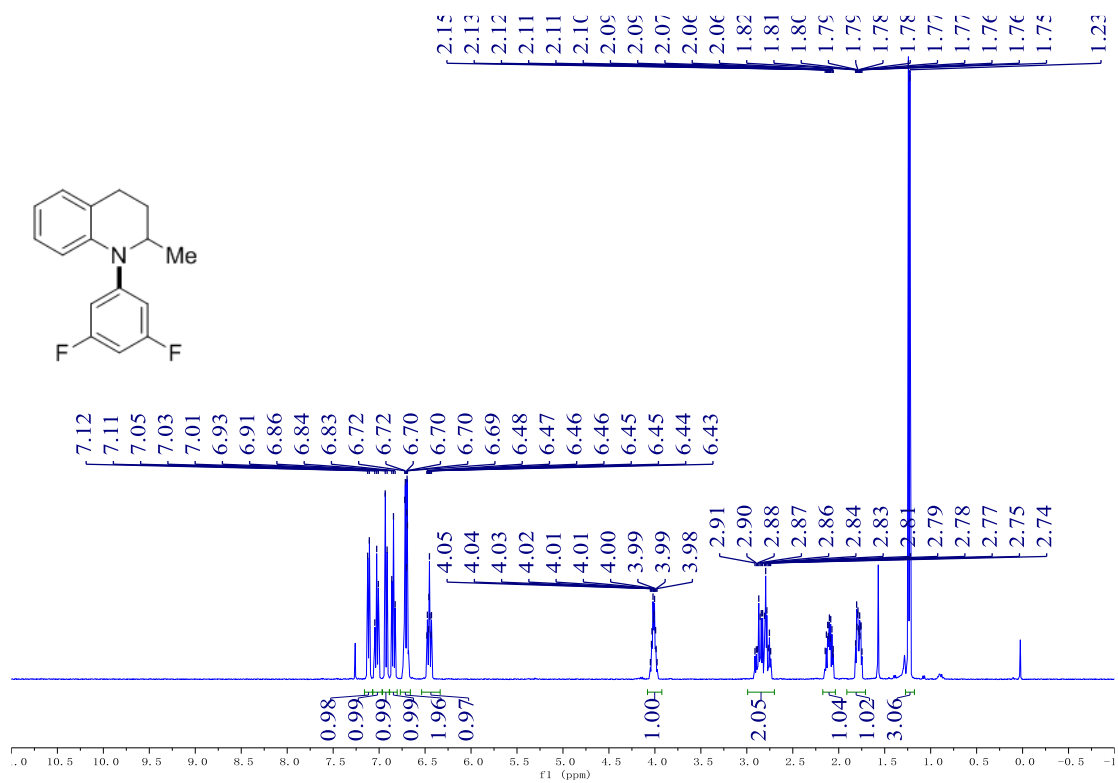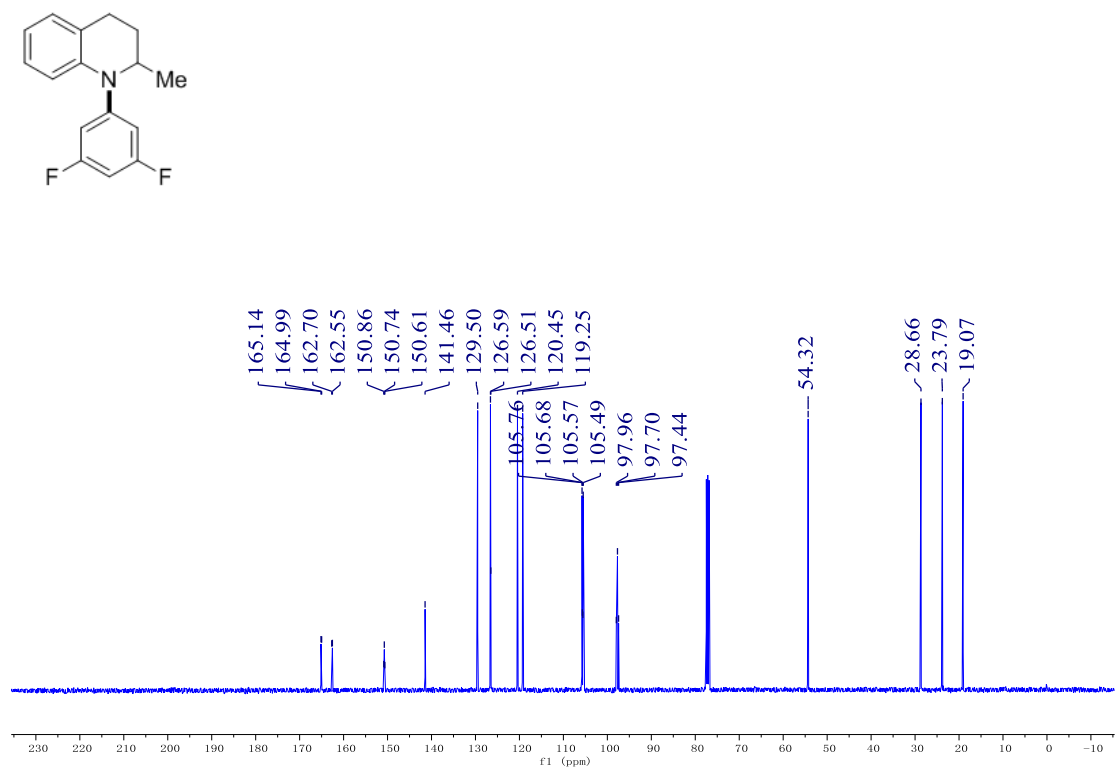



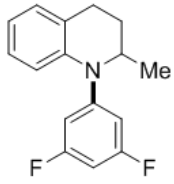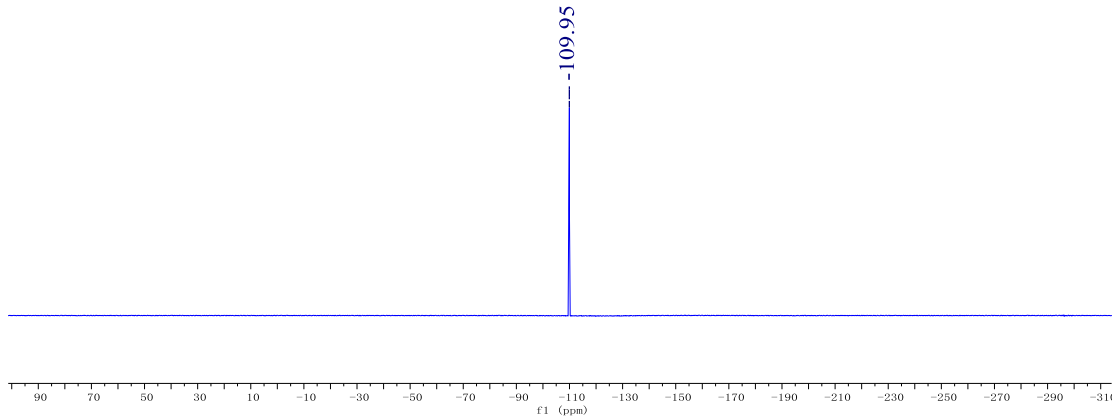

#### 4d

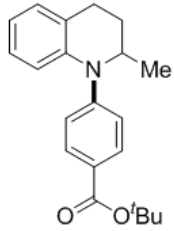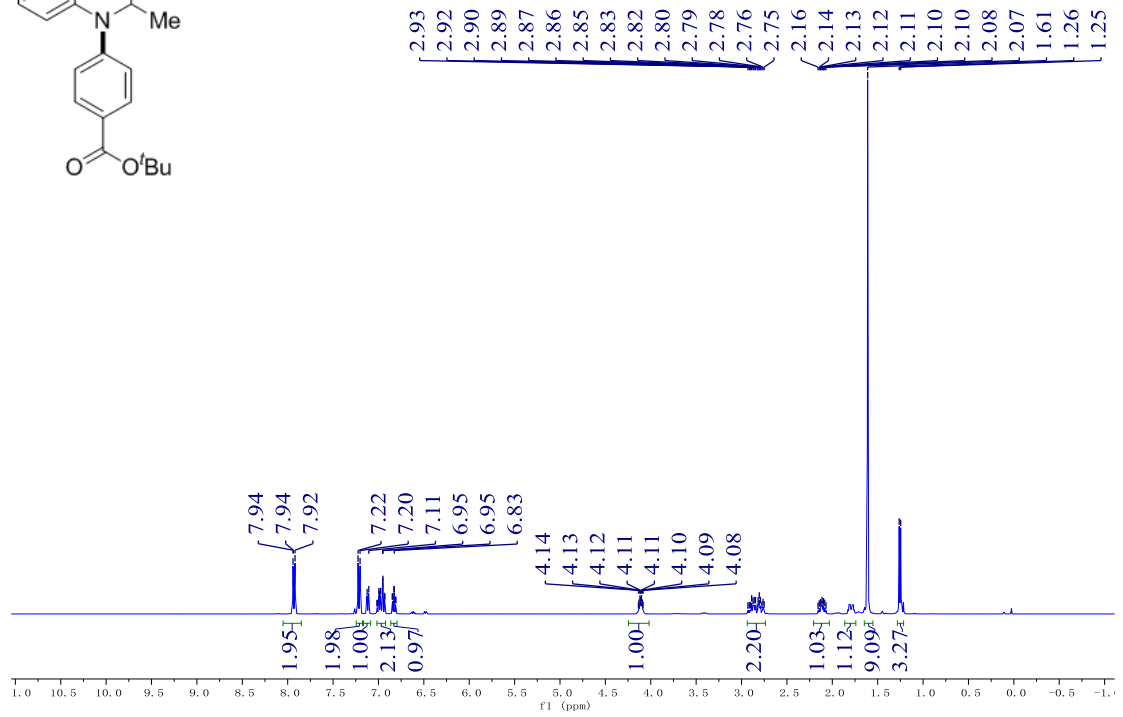

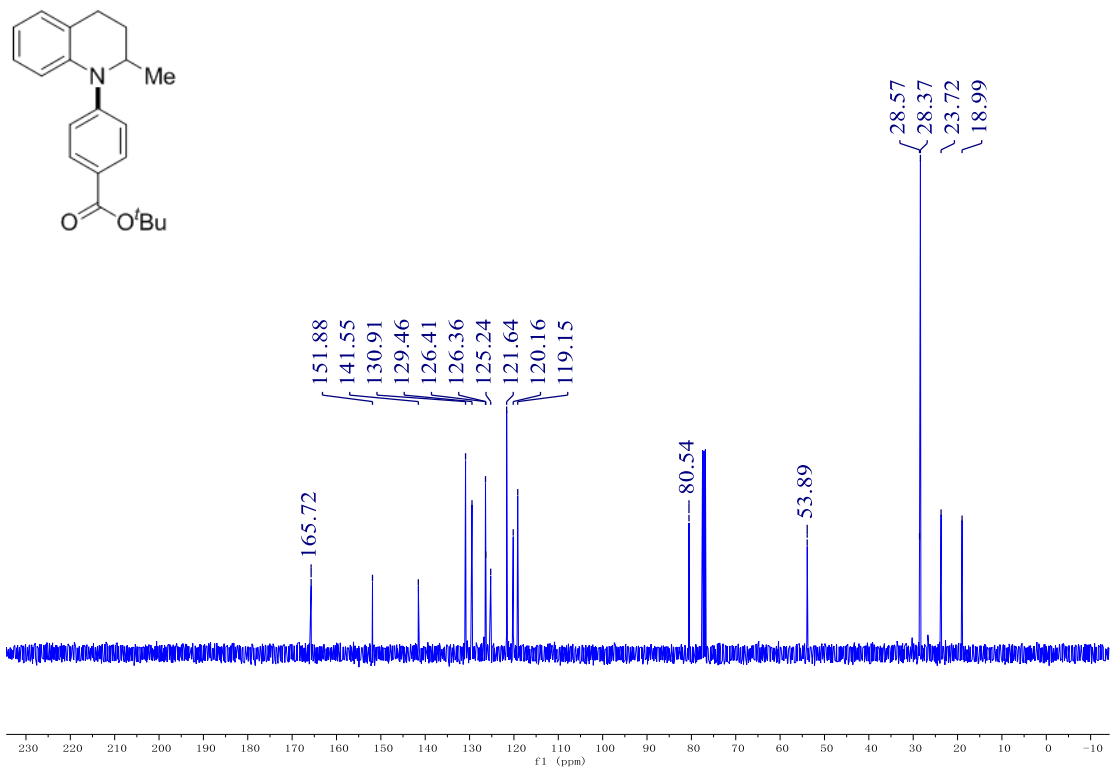

4e

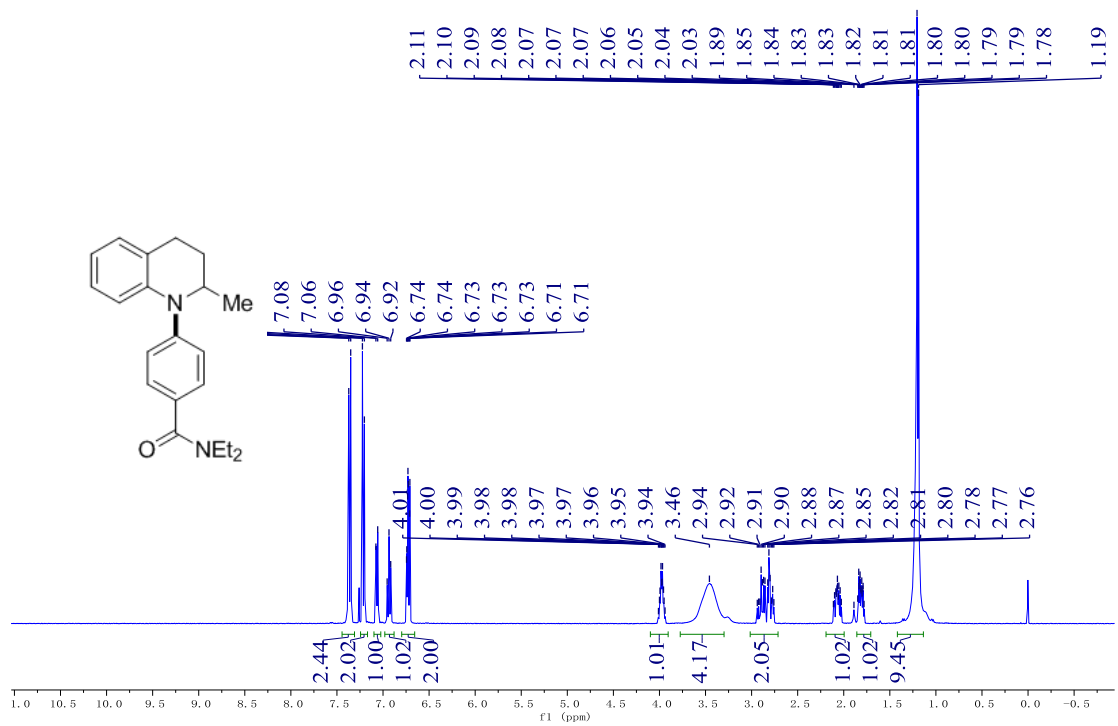

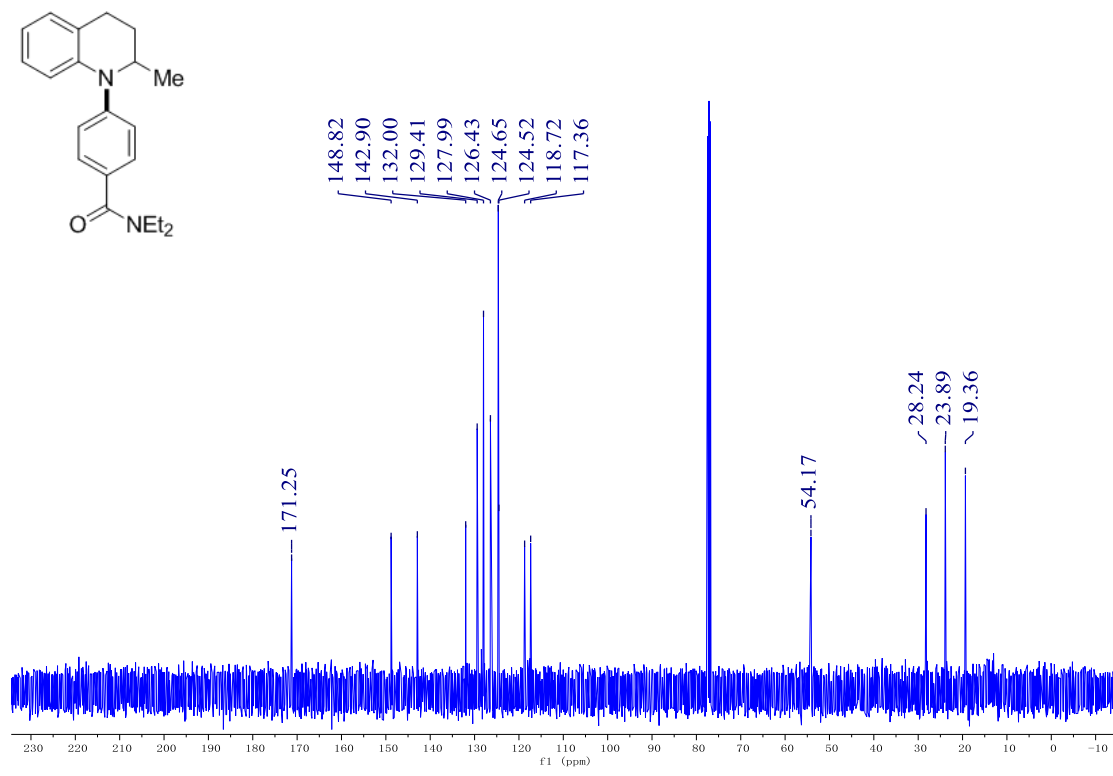

4f

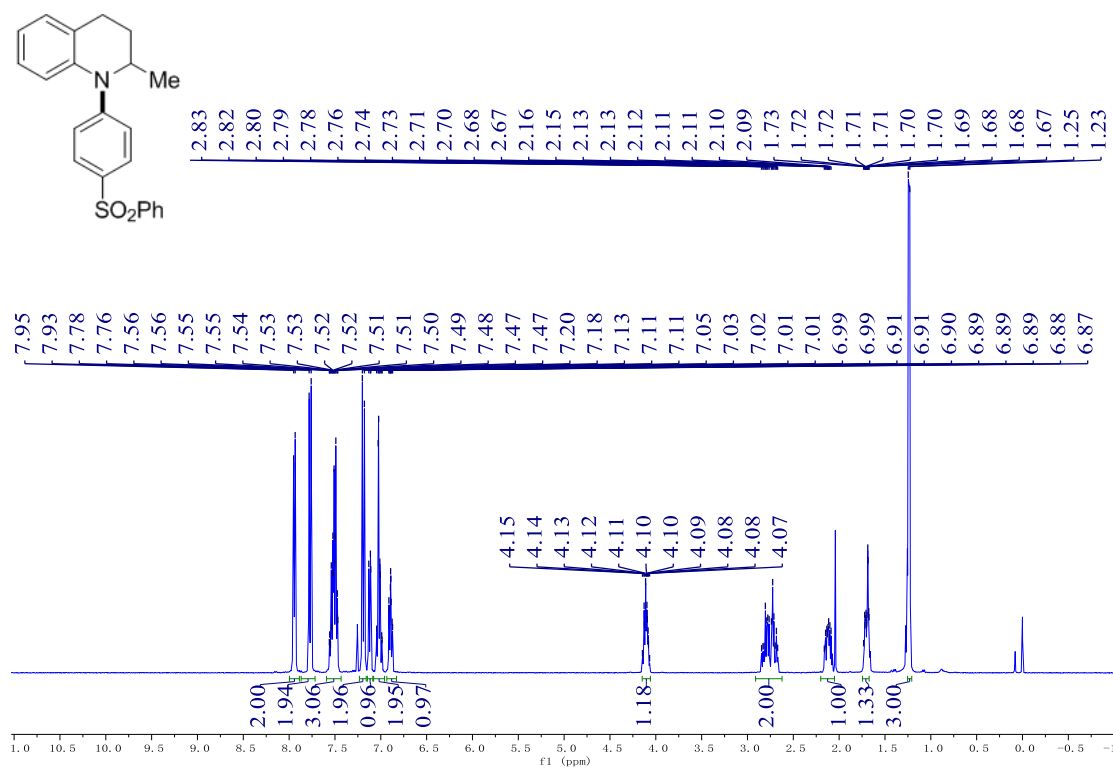

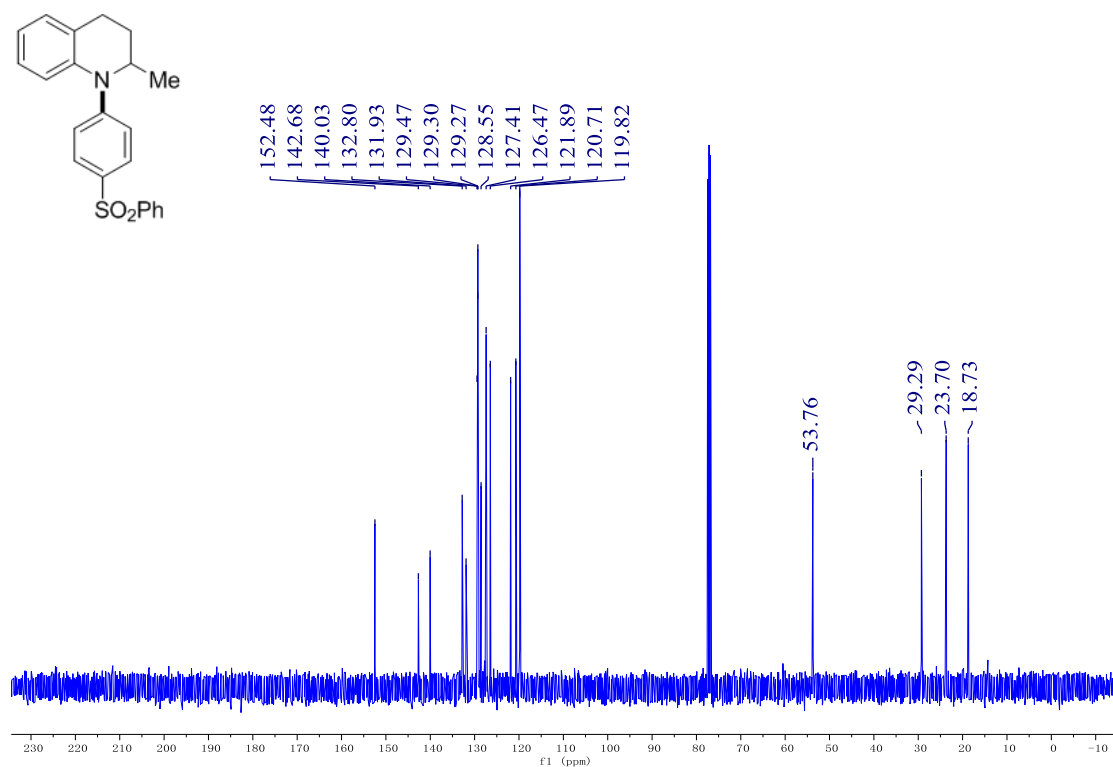

4g

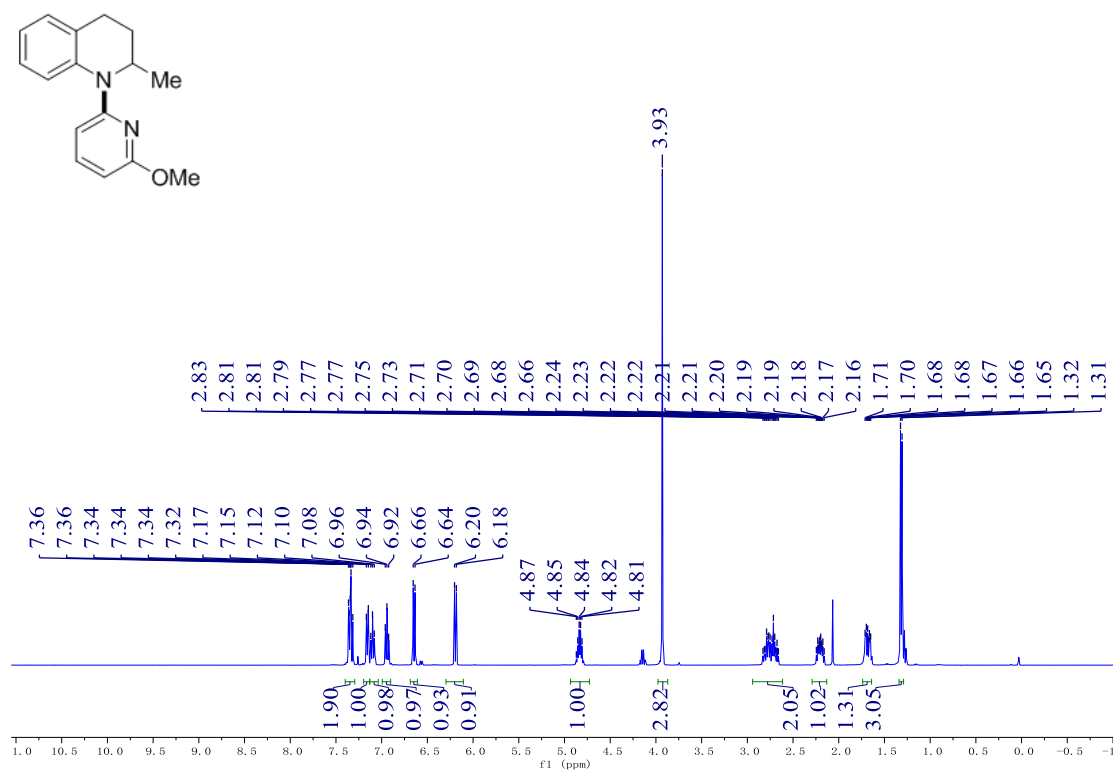

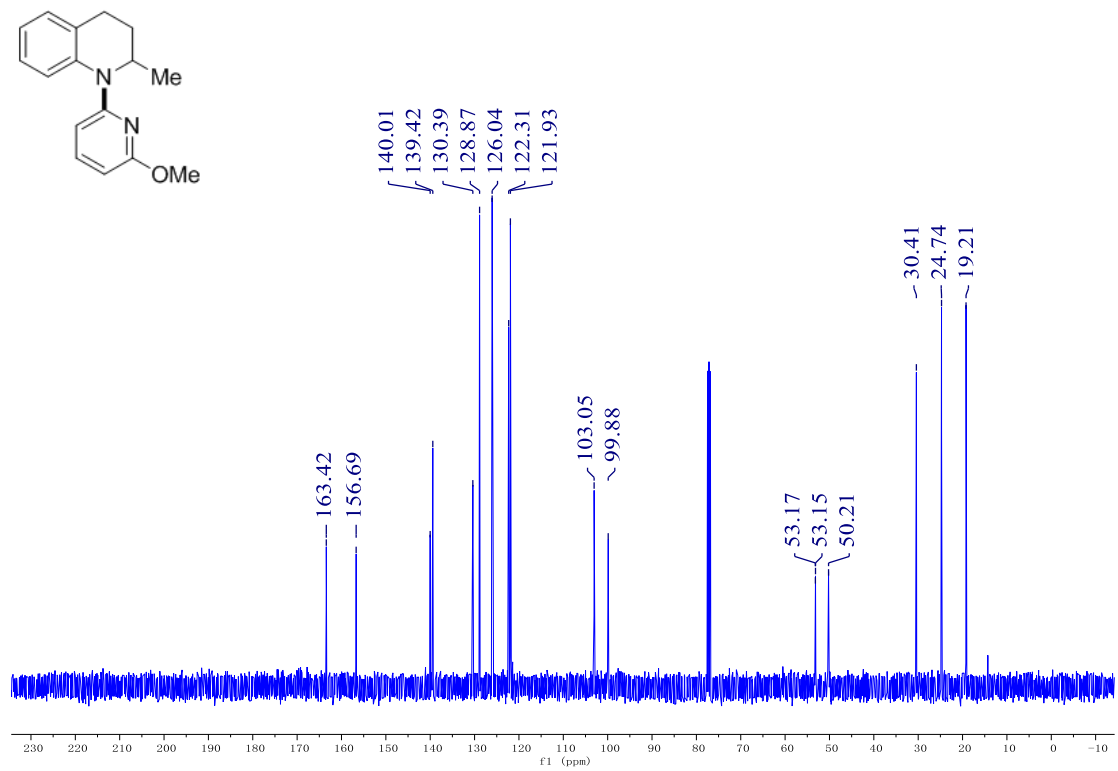

4h

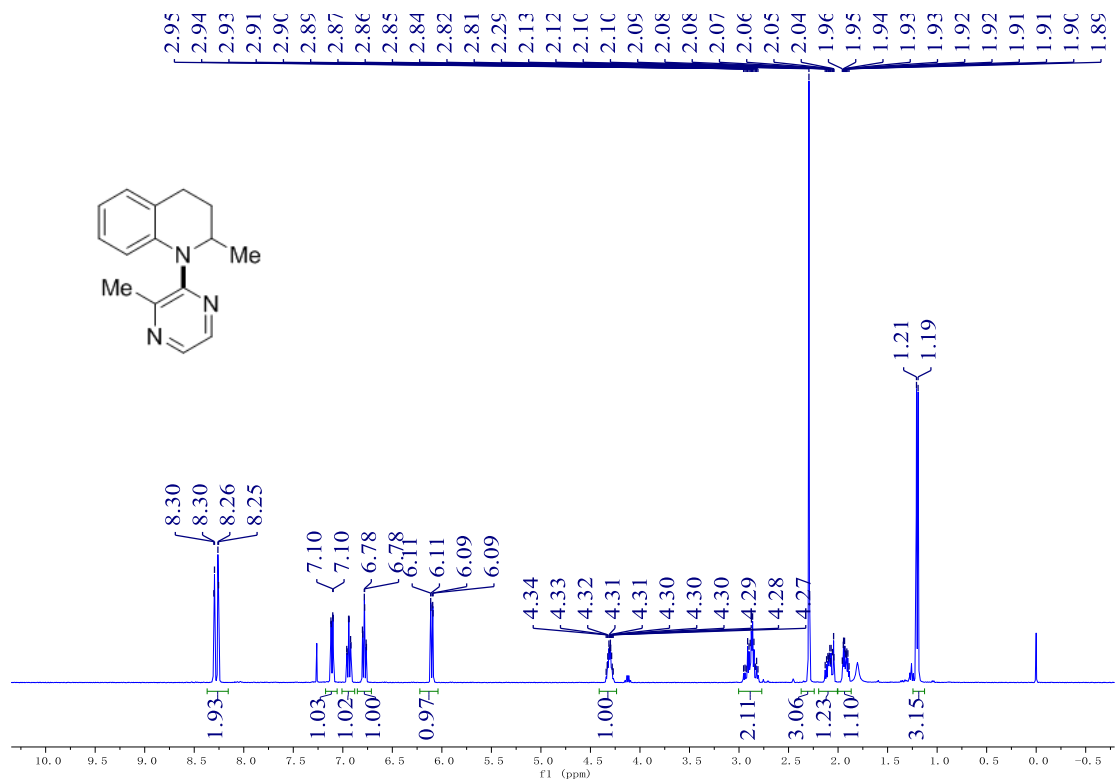

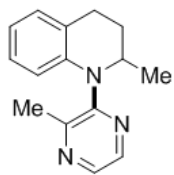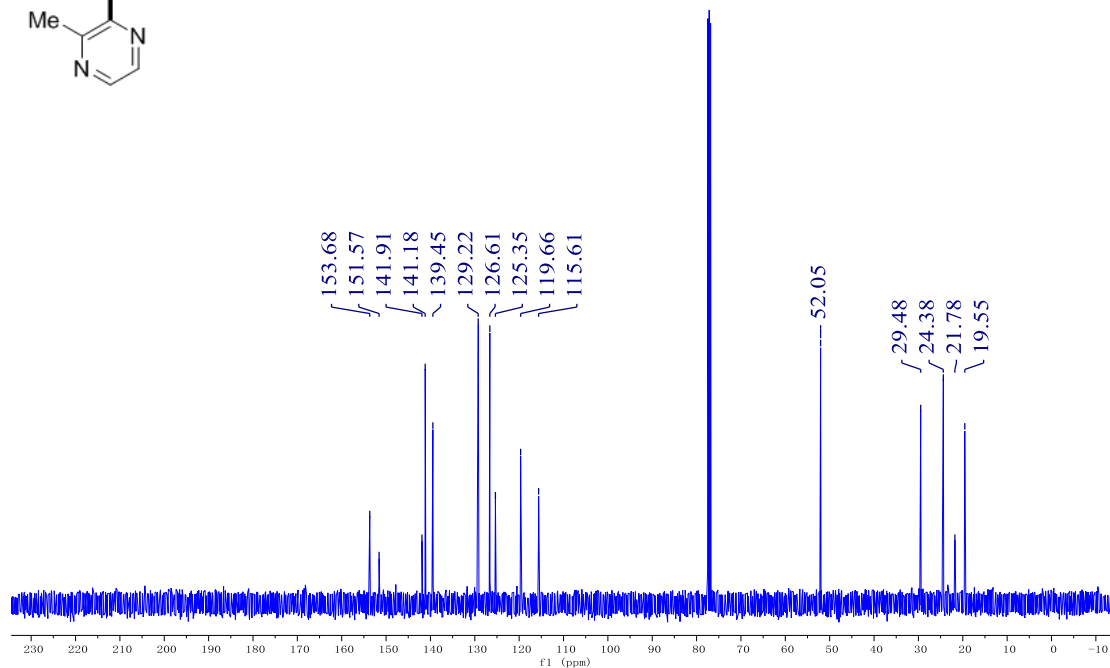

4i

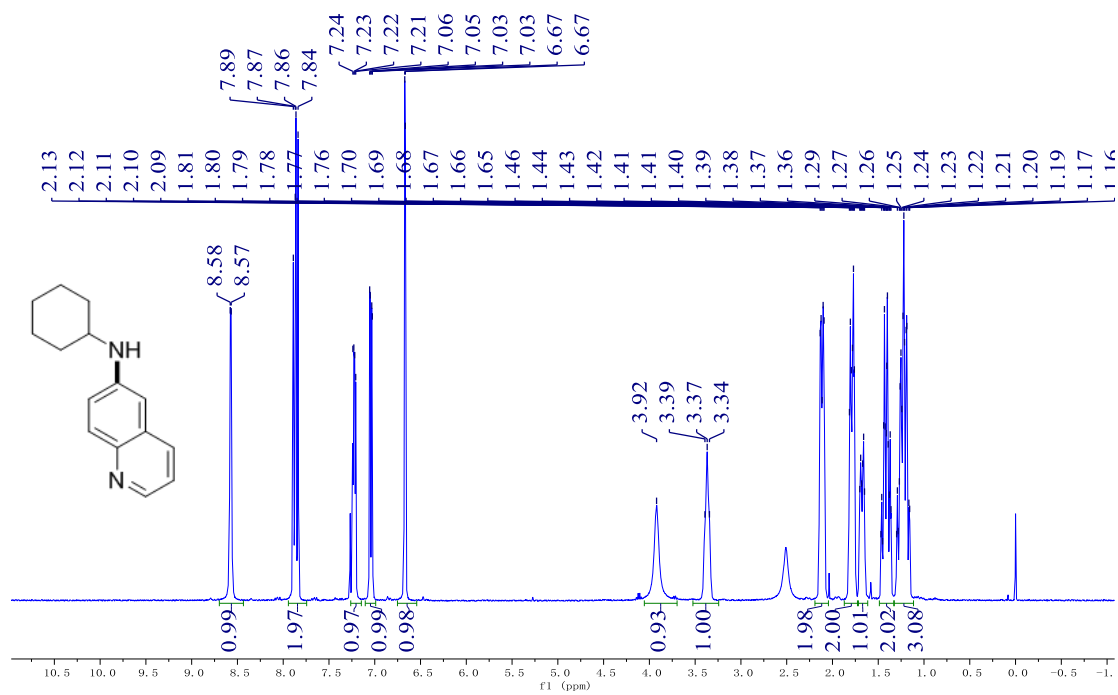

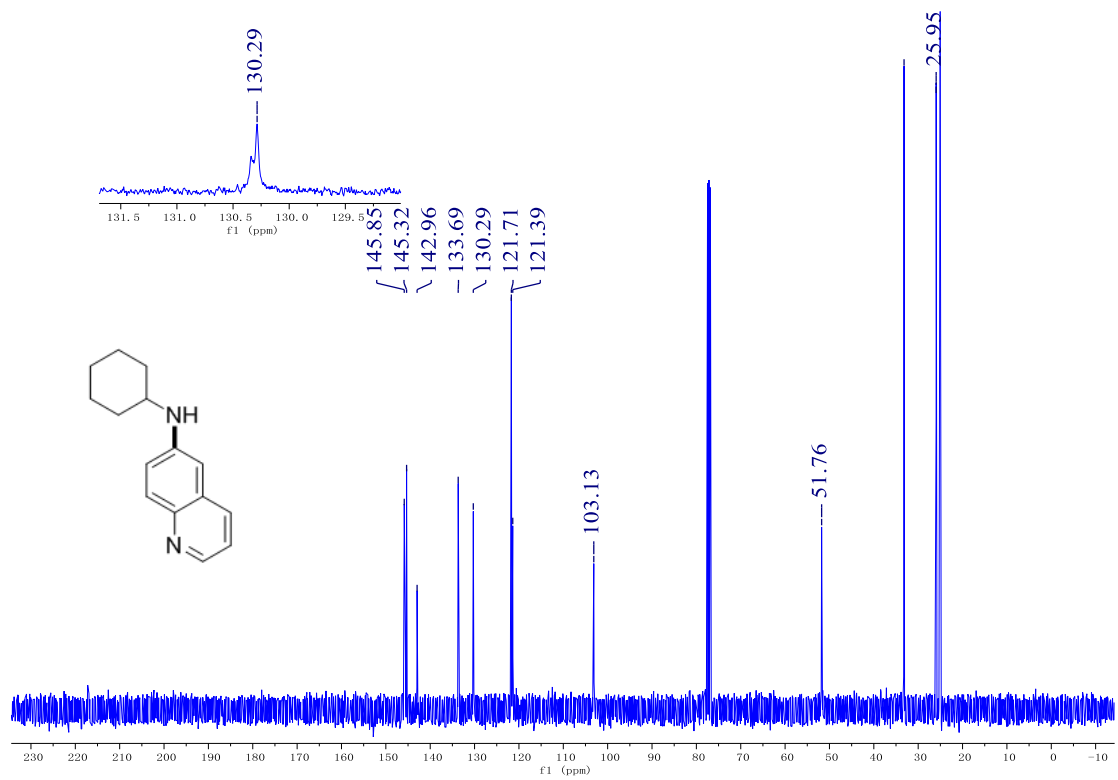

4j

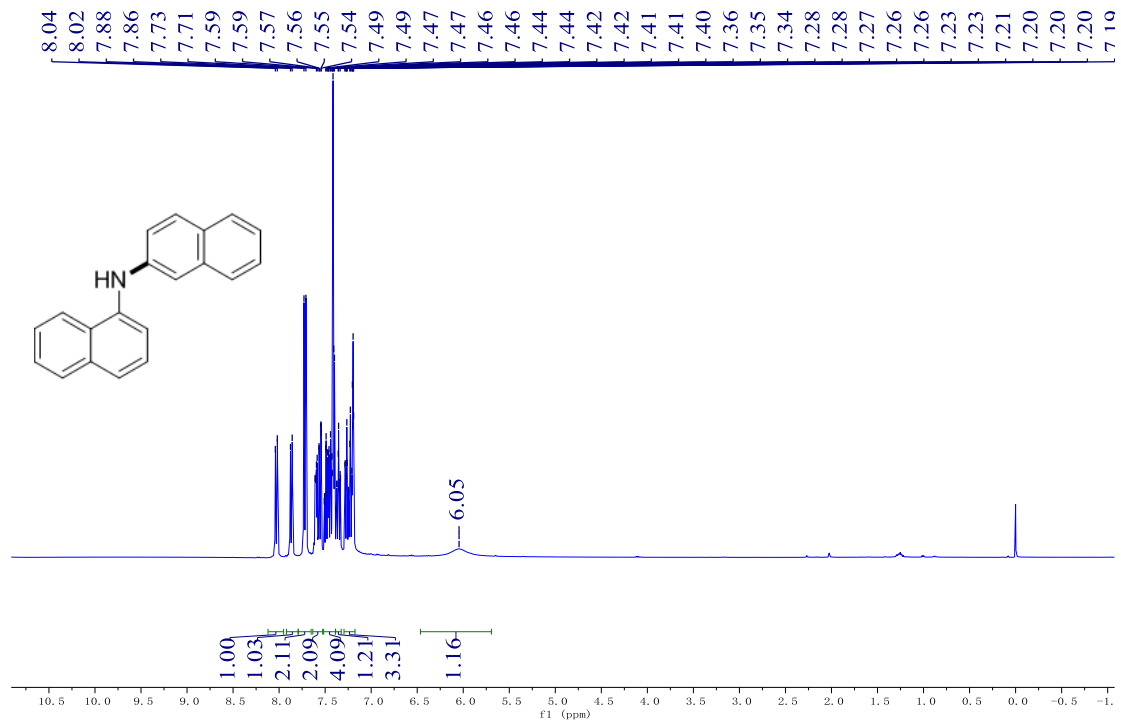

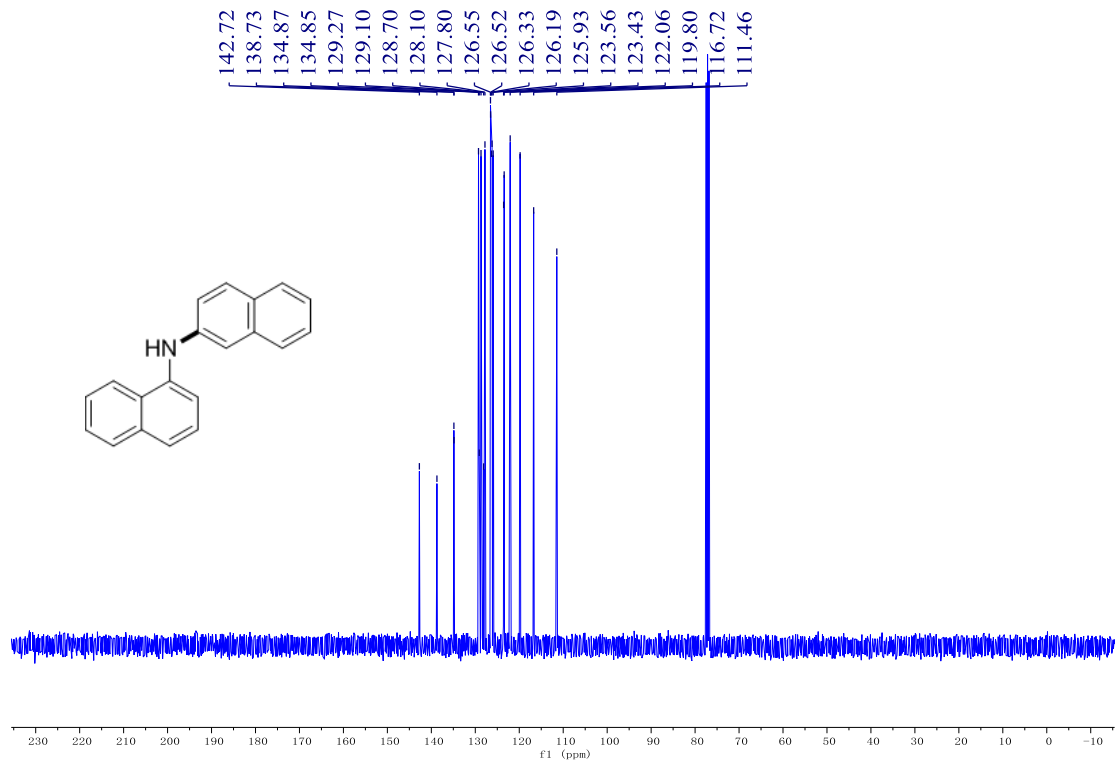

4k

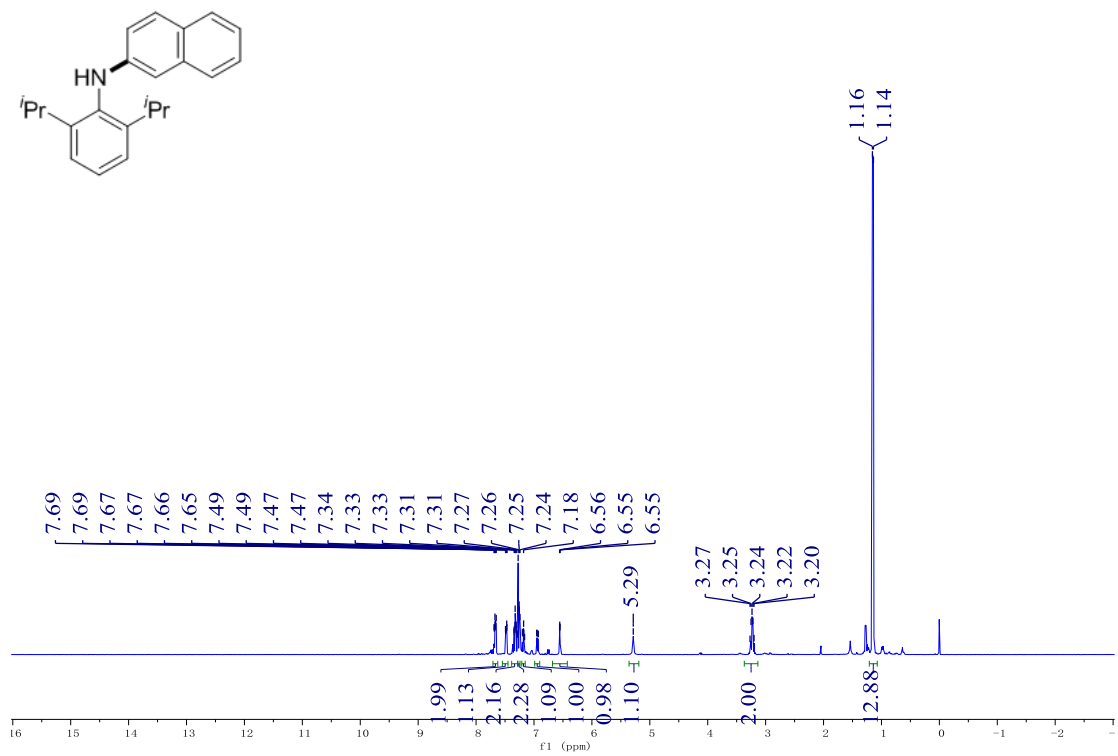



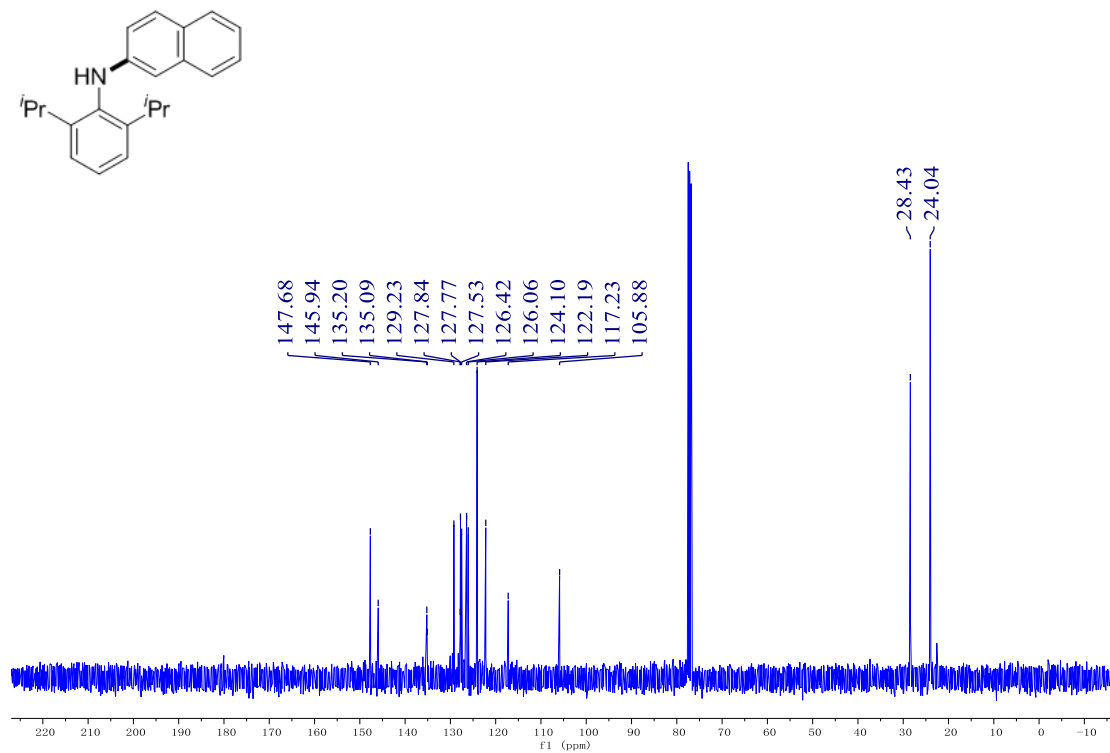

41

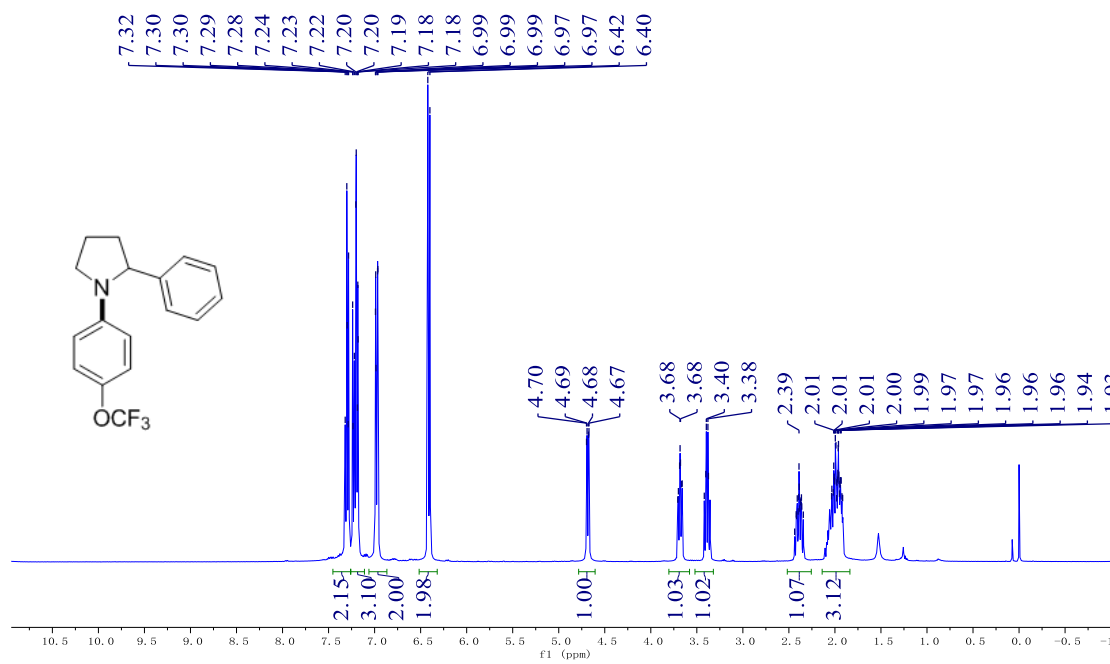

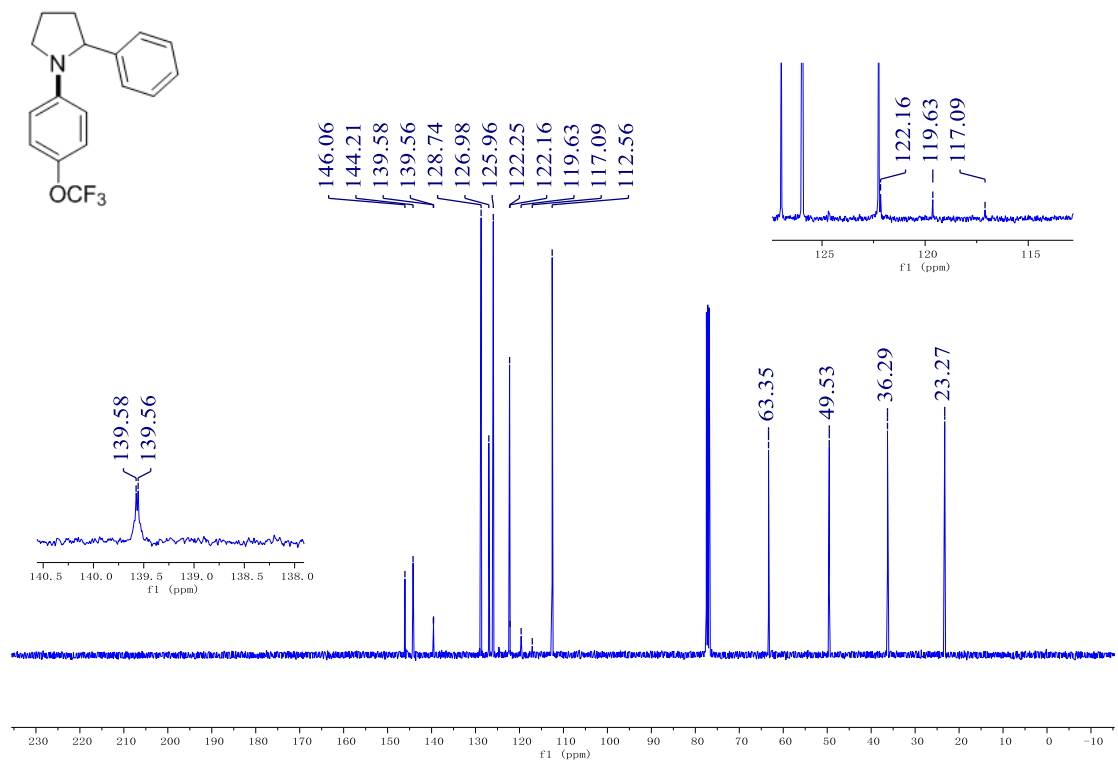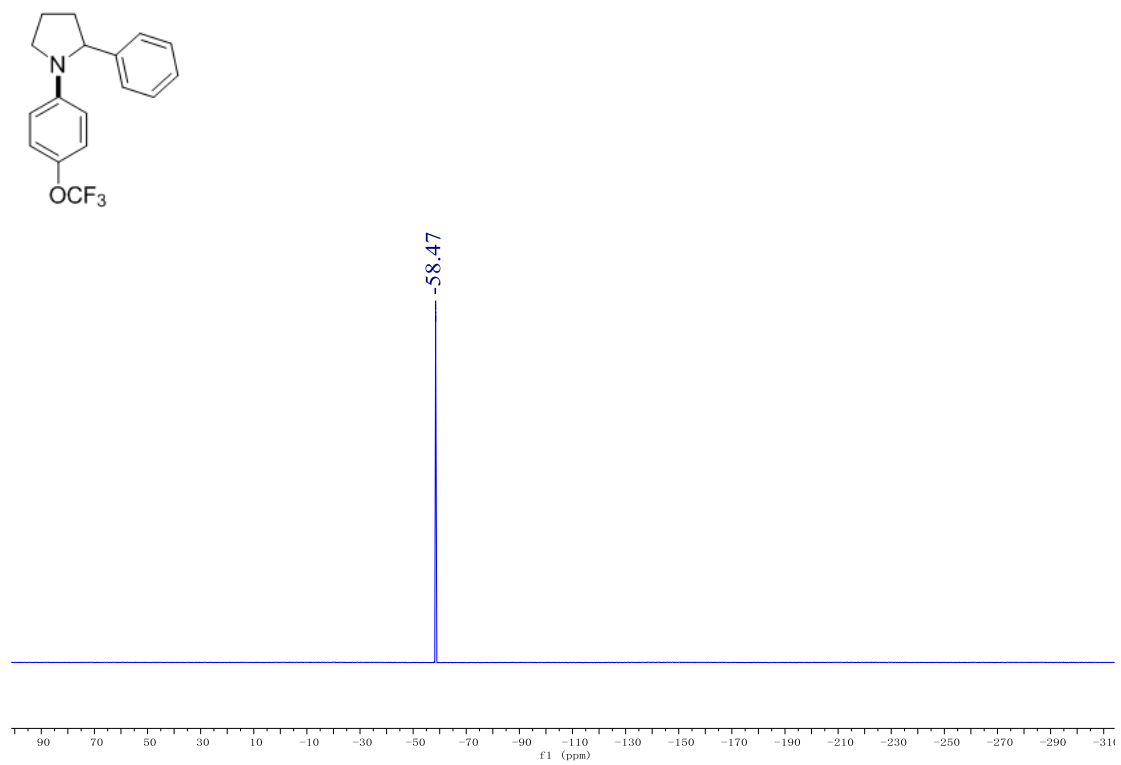

4m

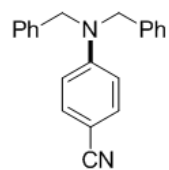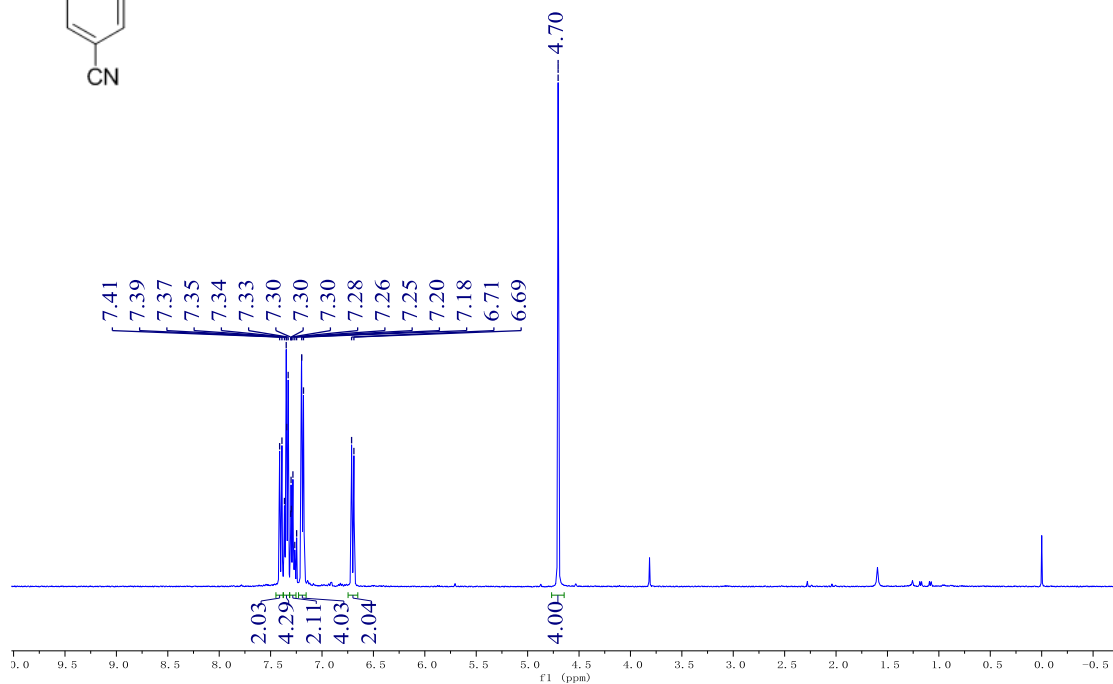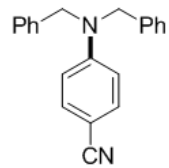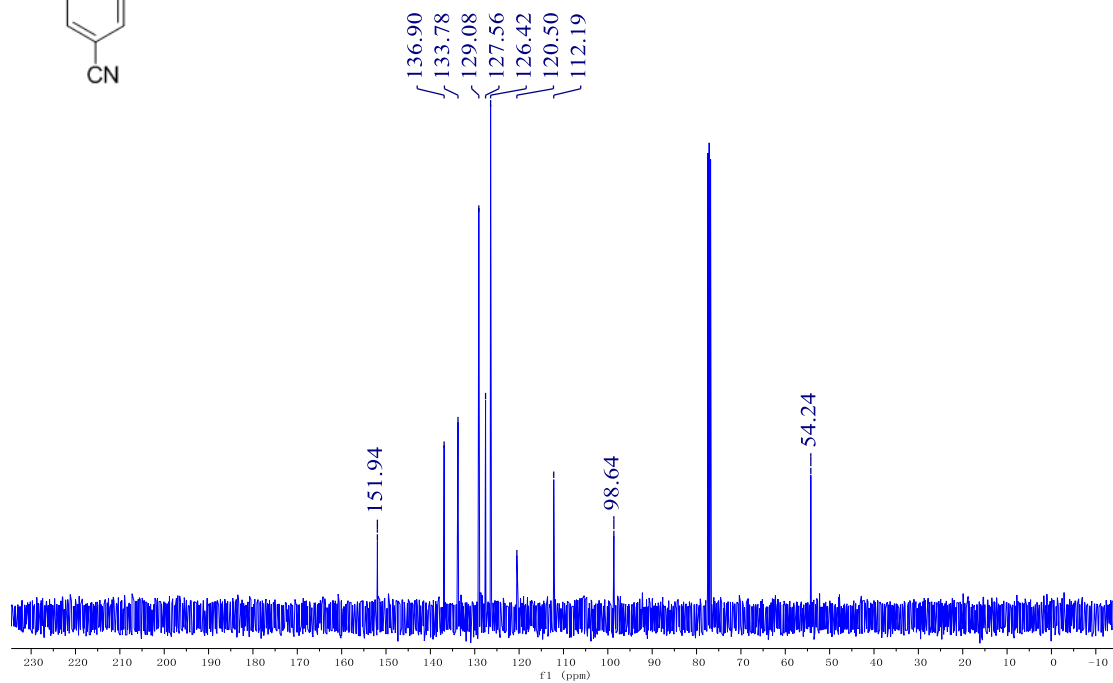

4n

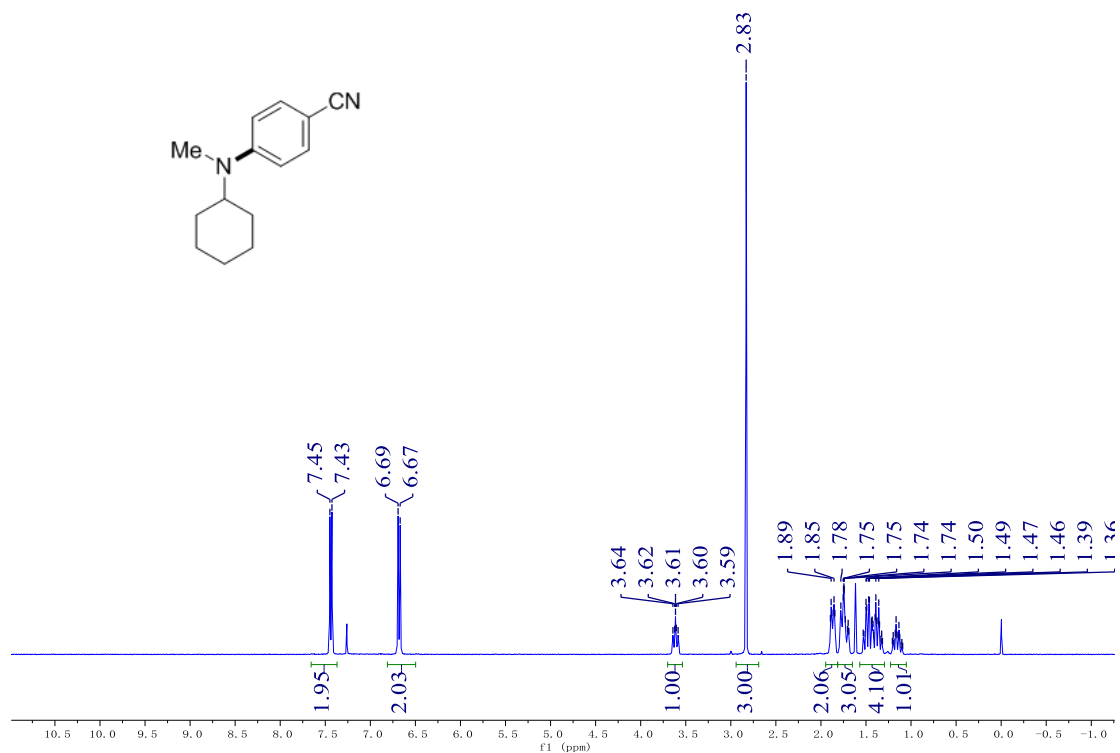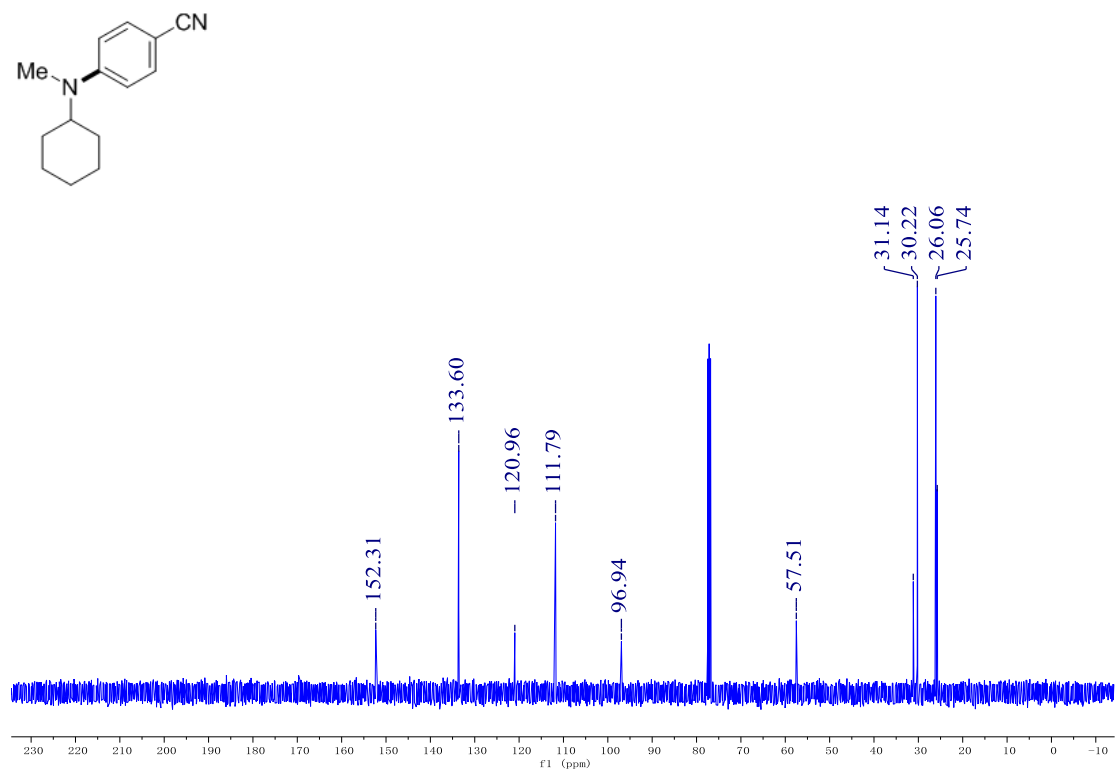

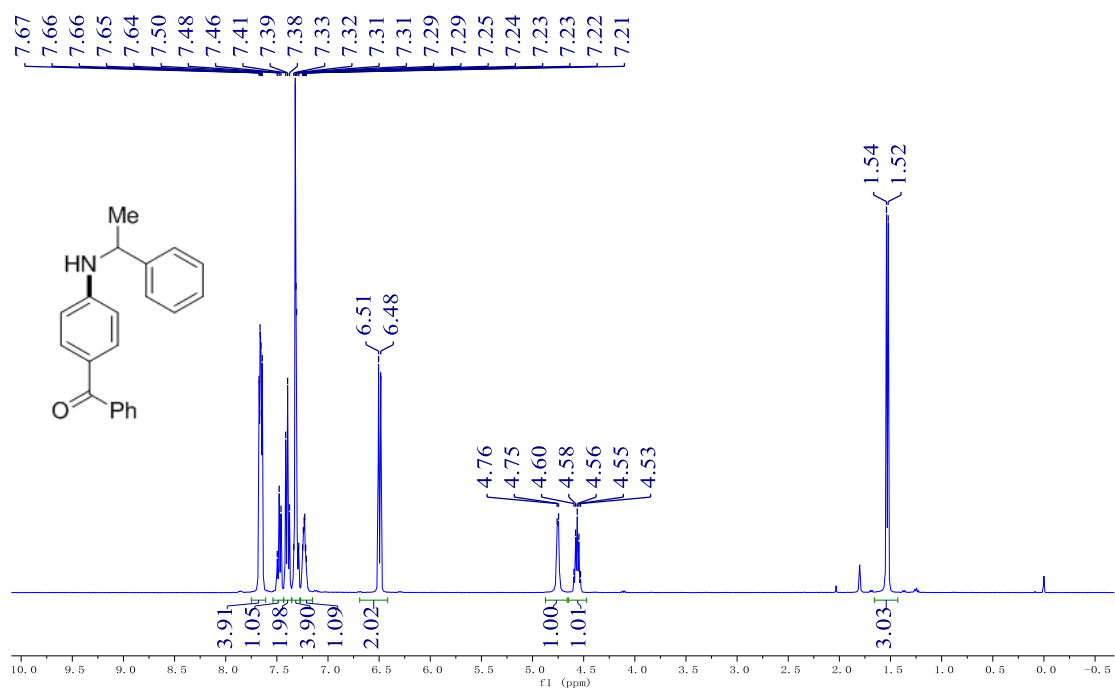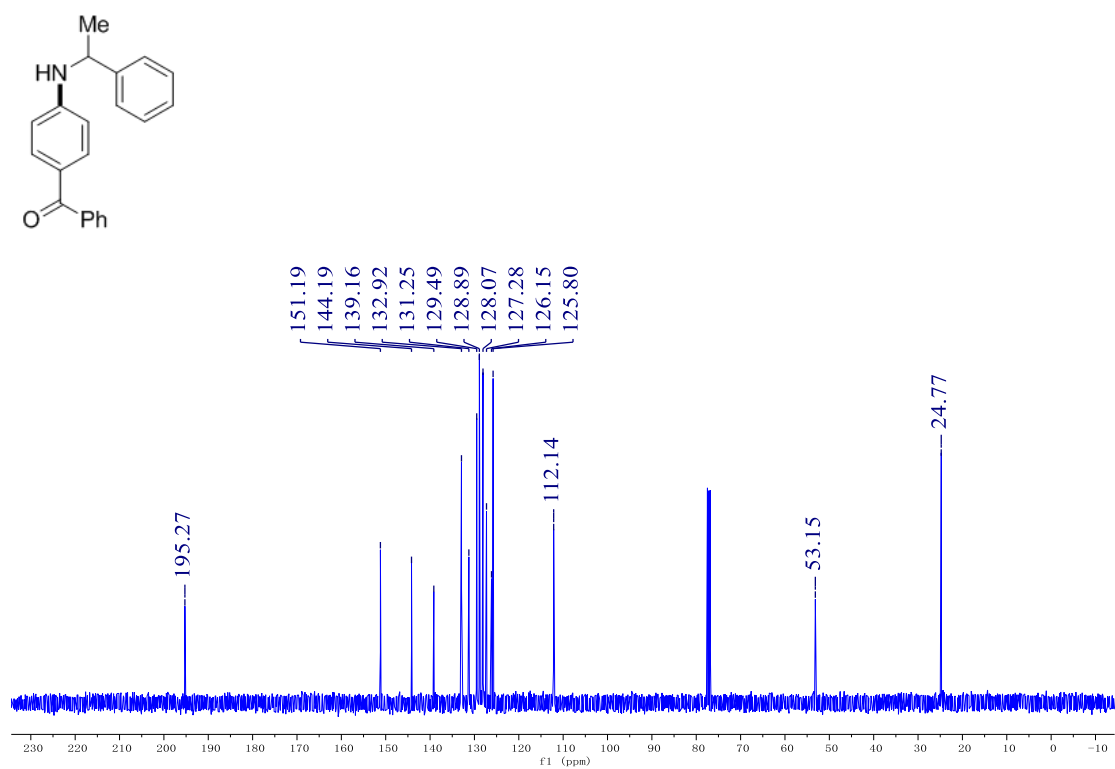

4p

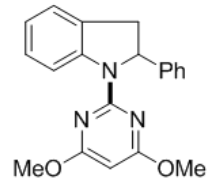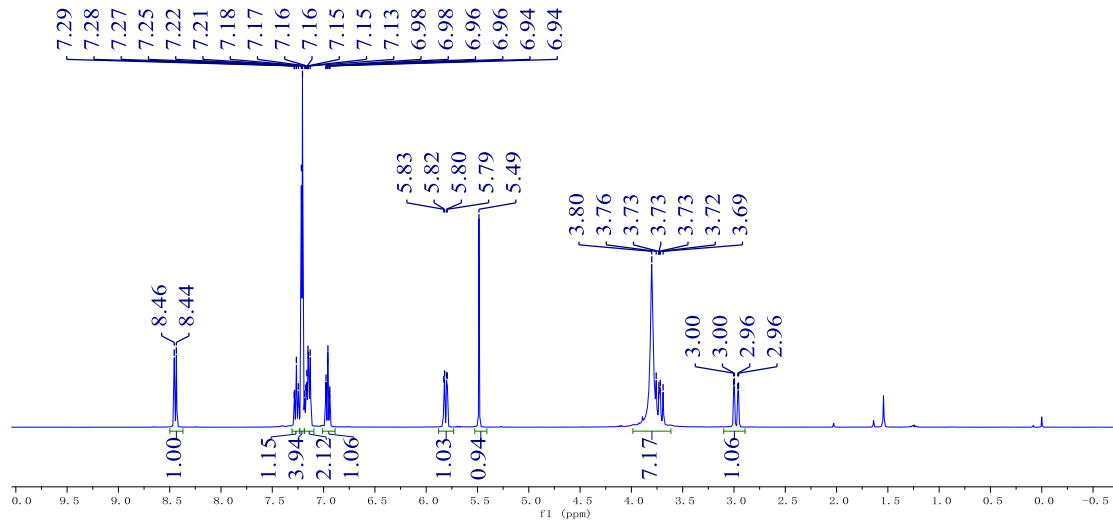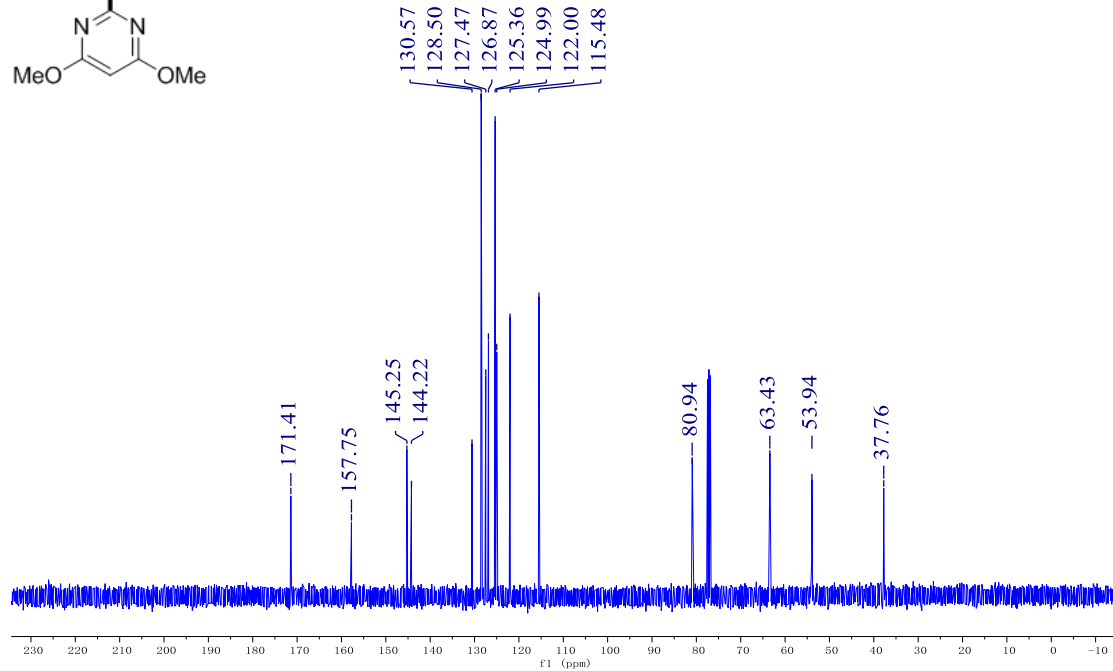

4q

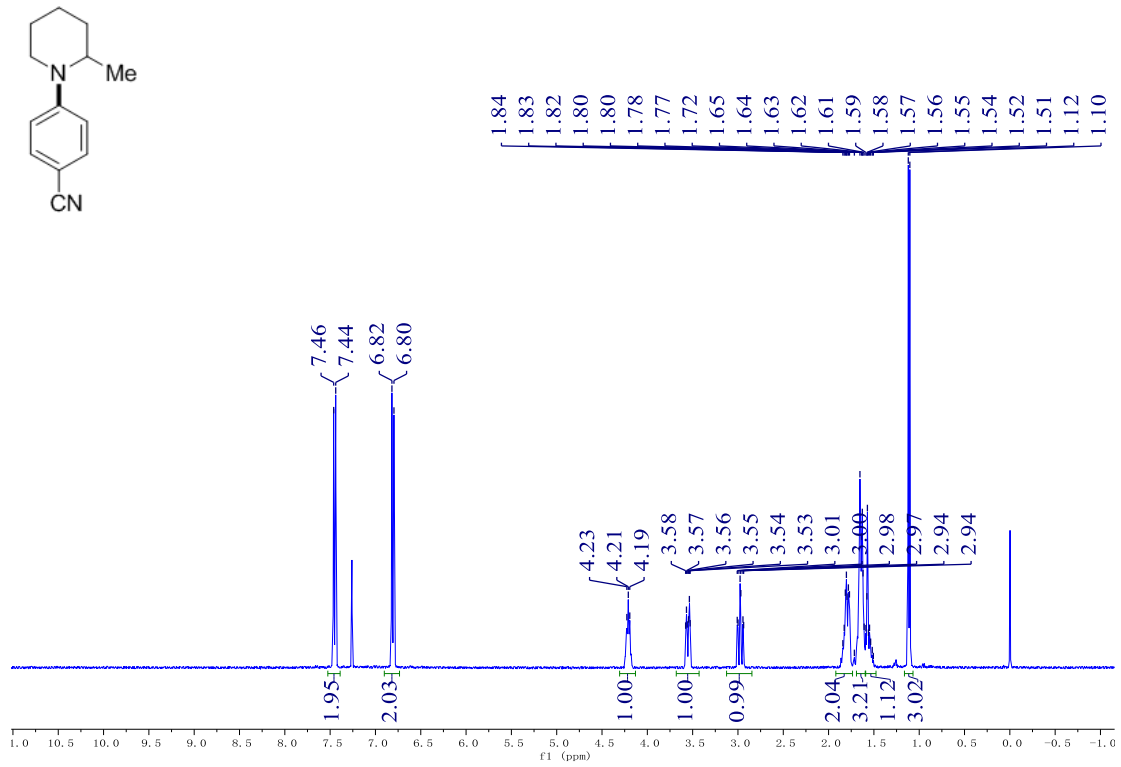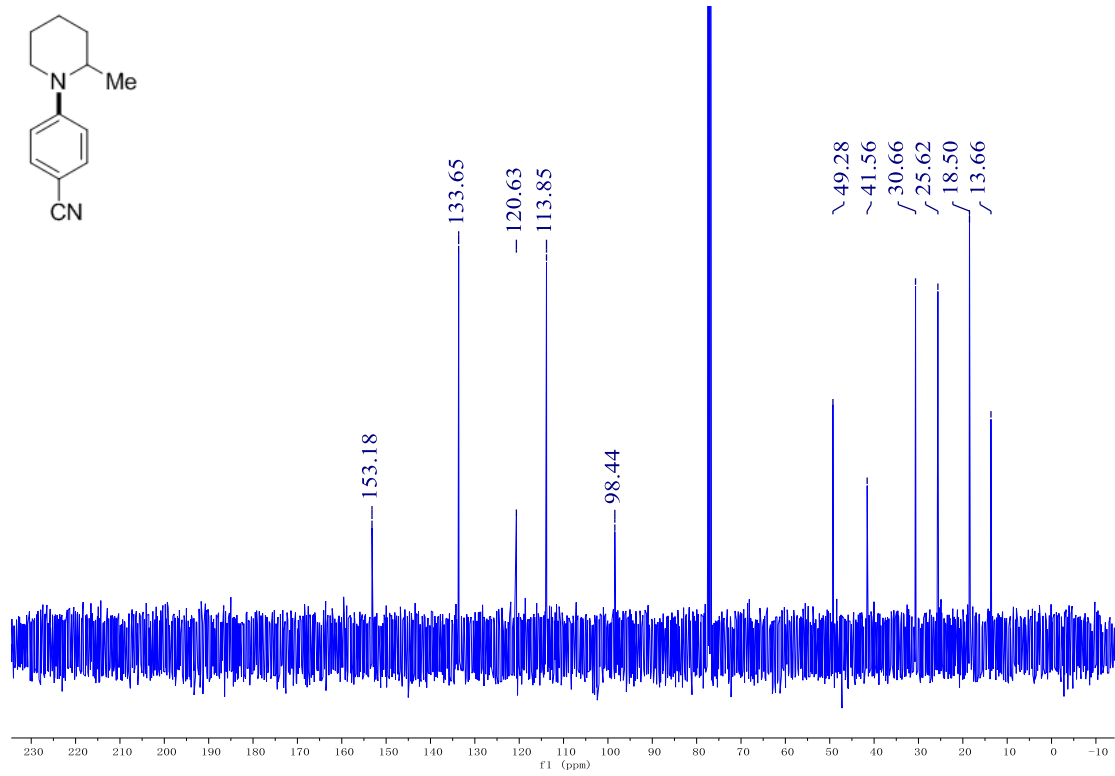

4r

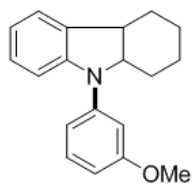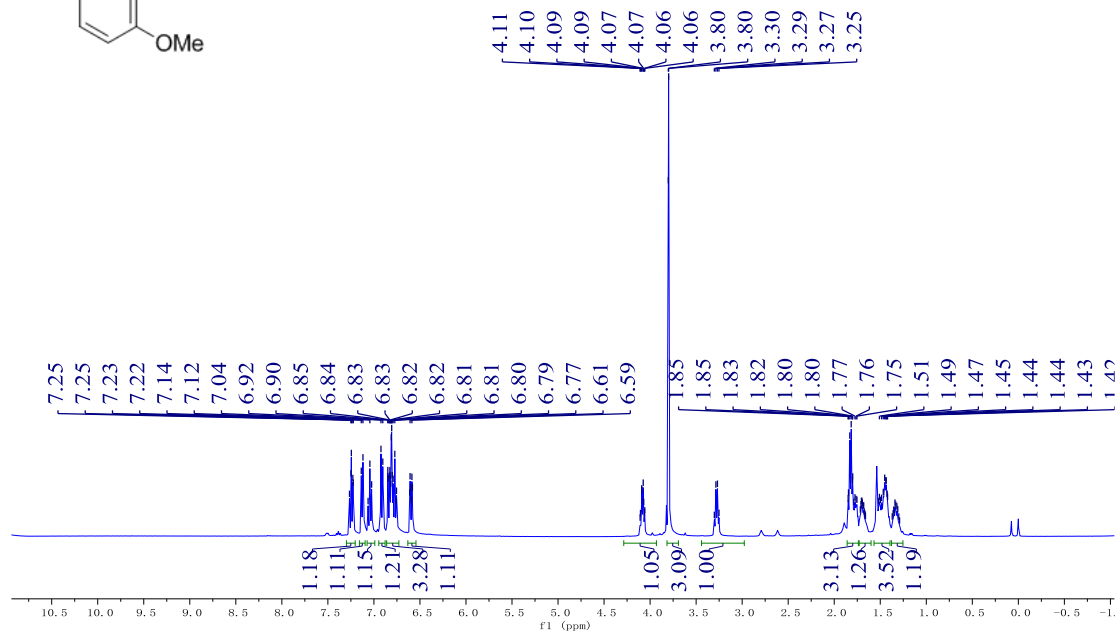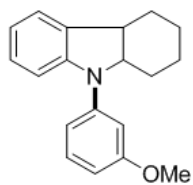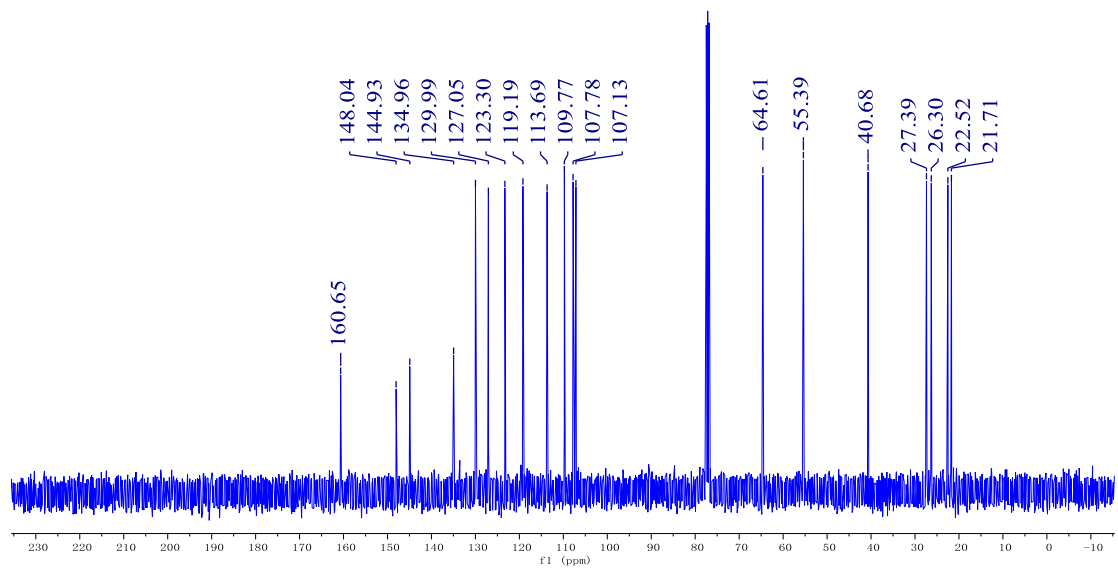



4s

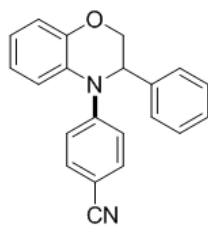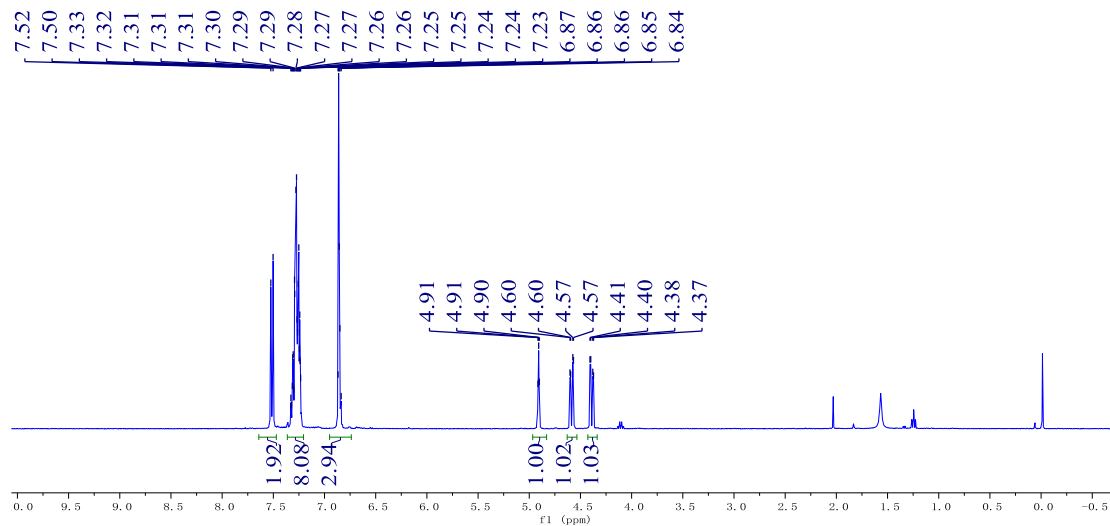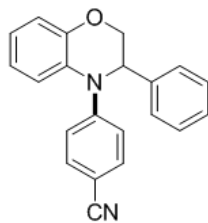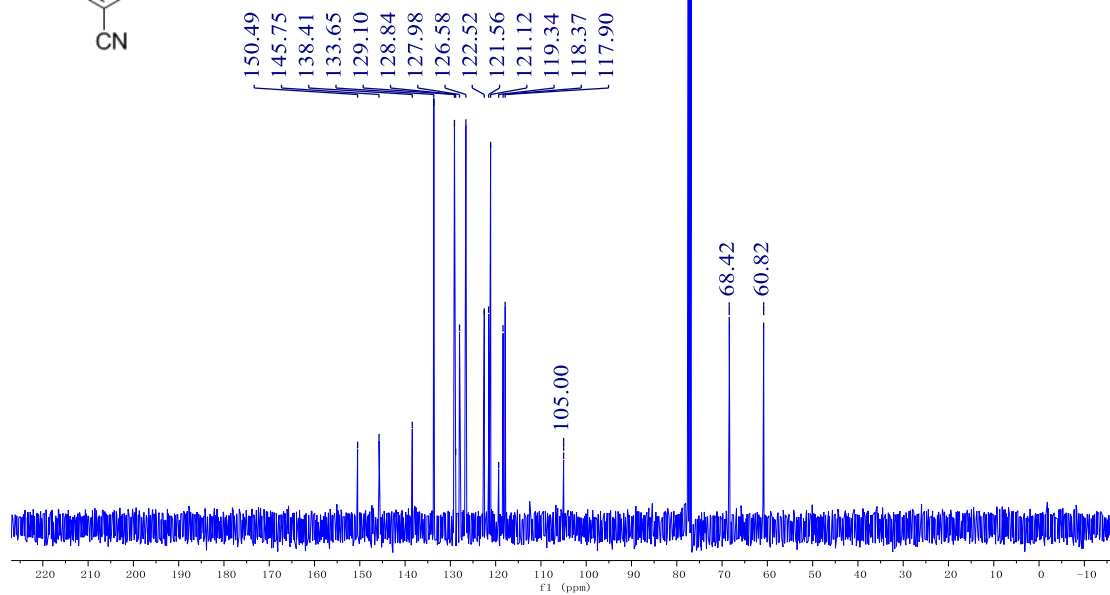

4t

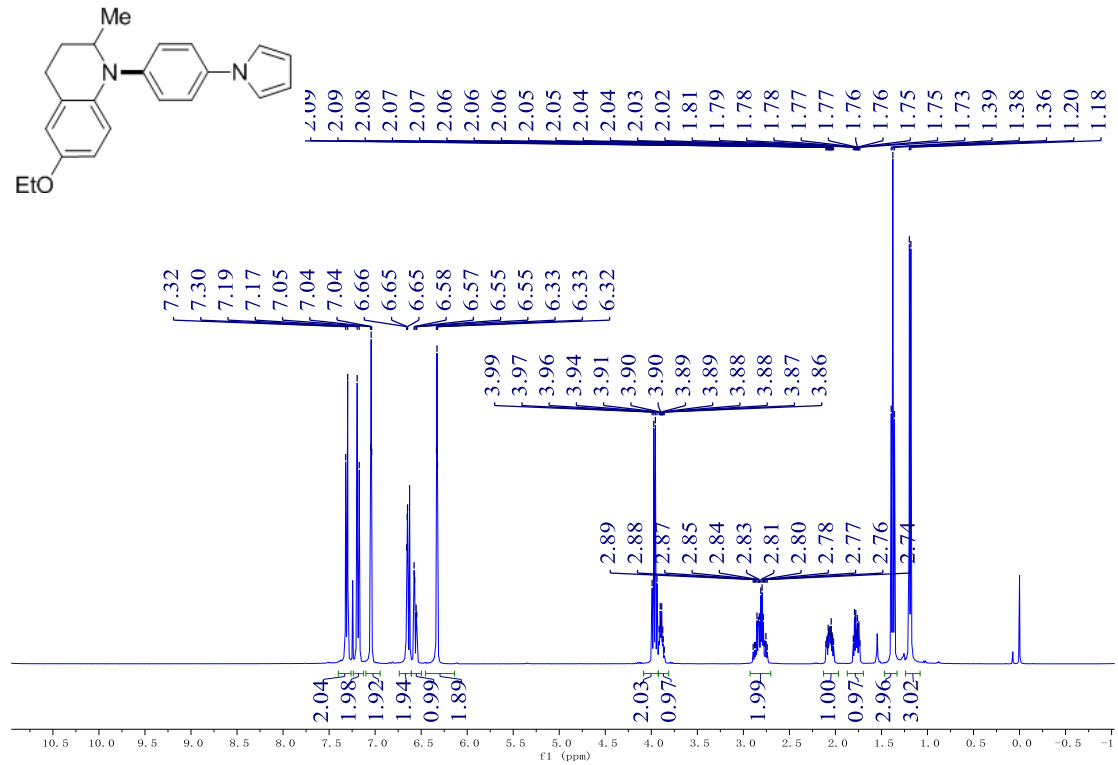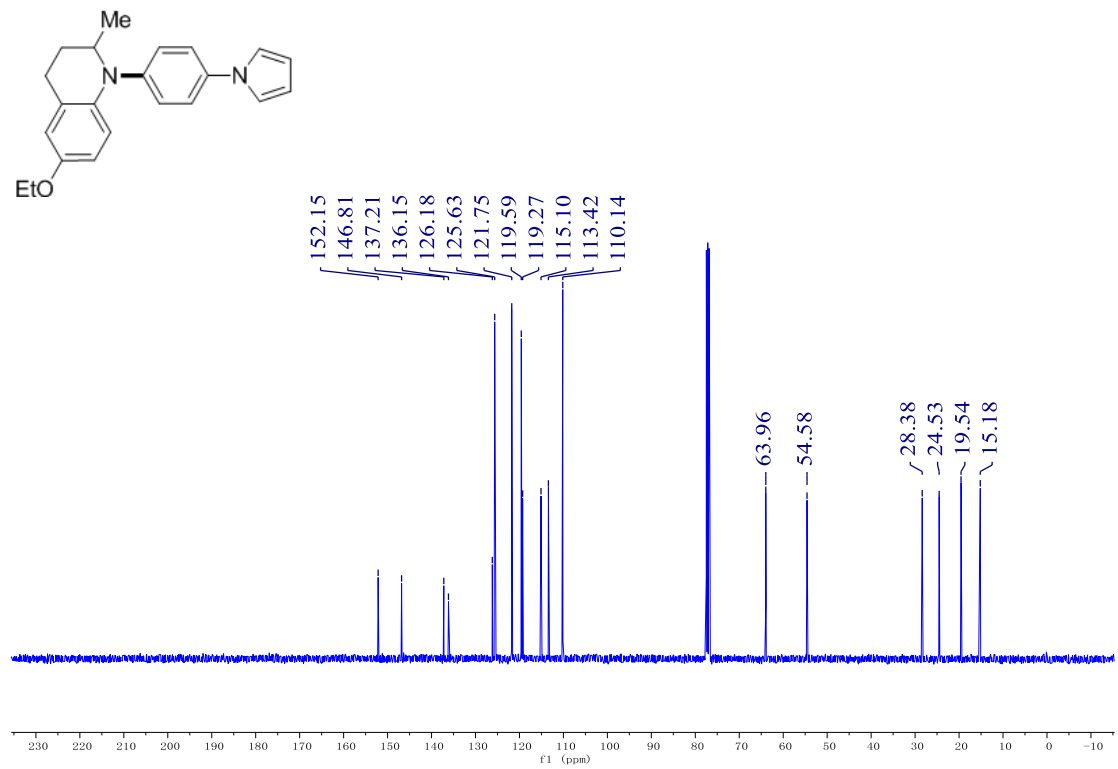

5a

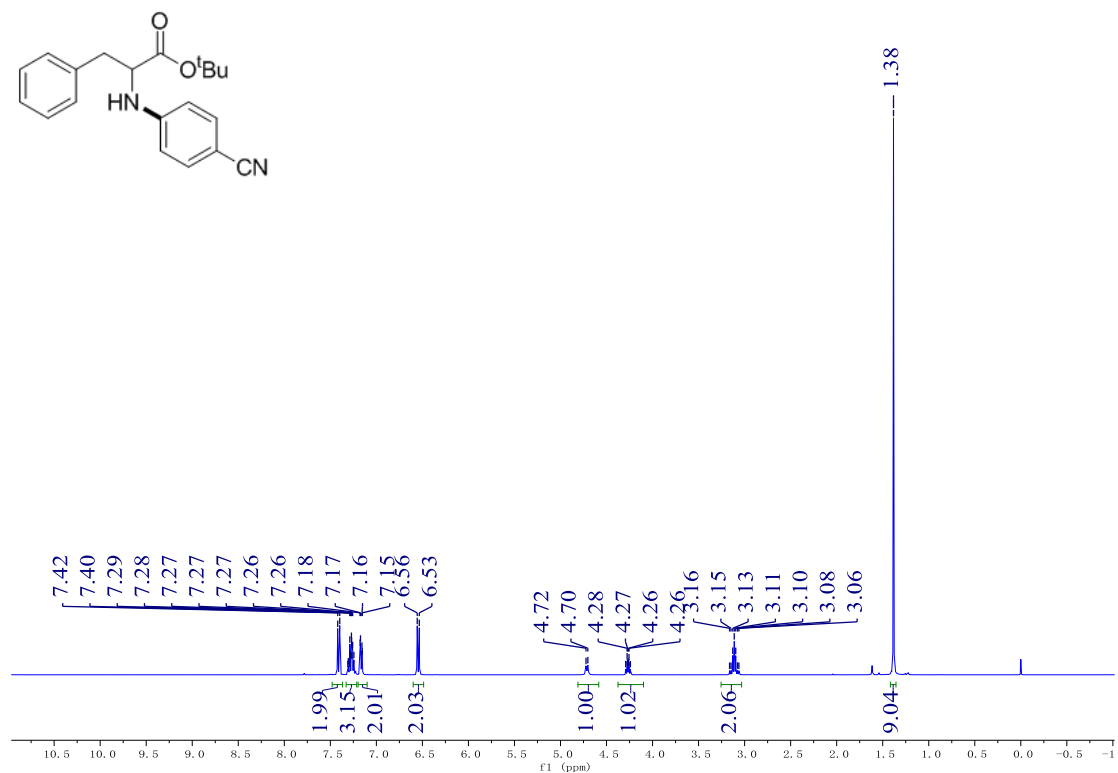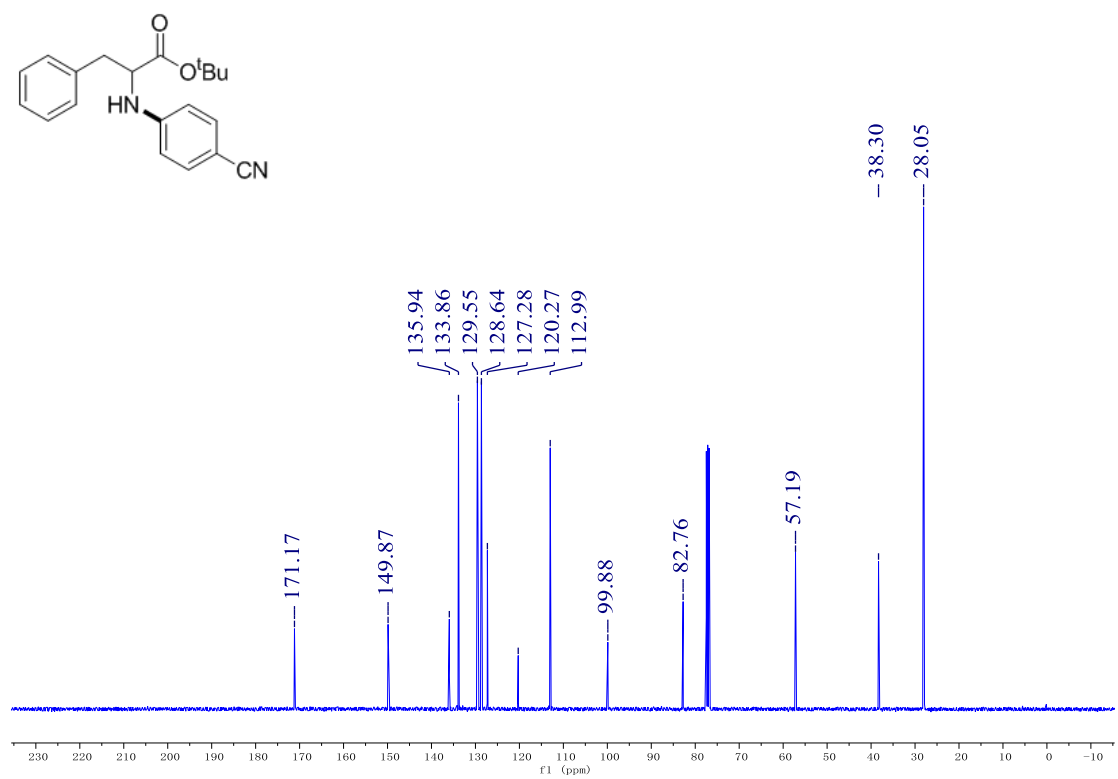

5b

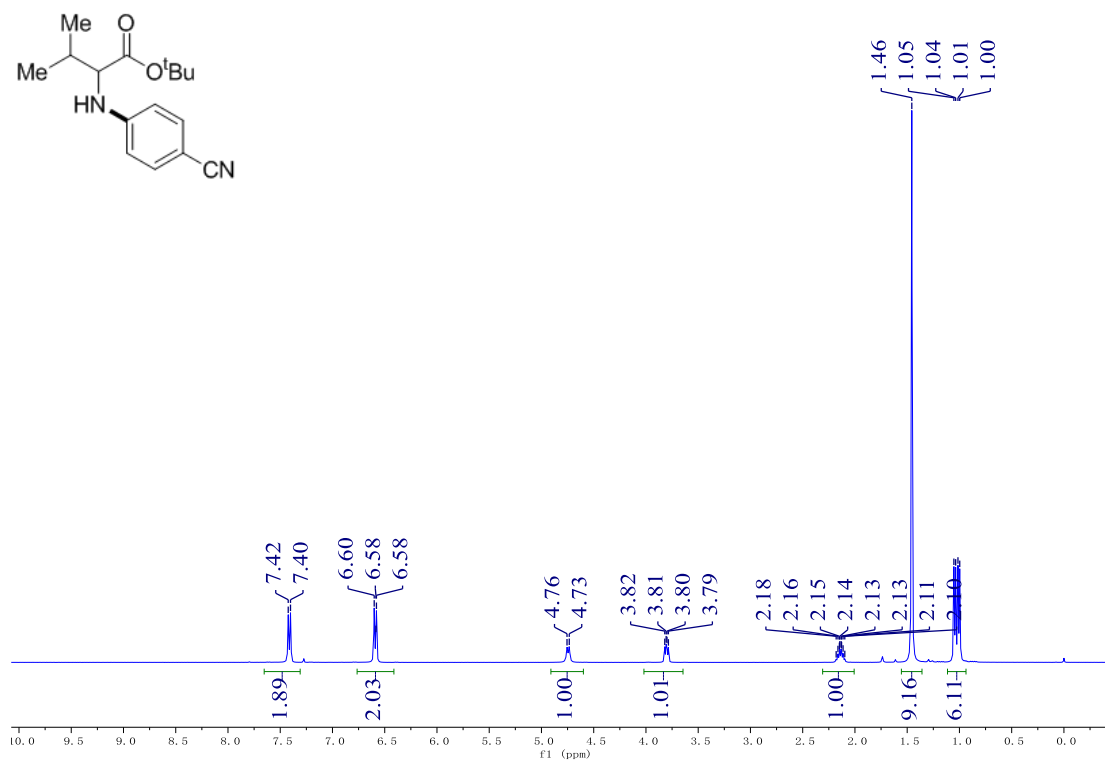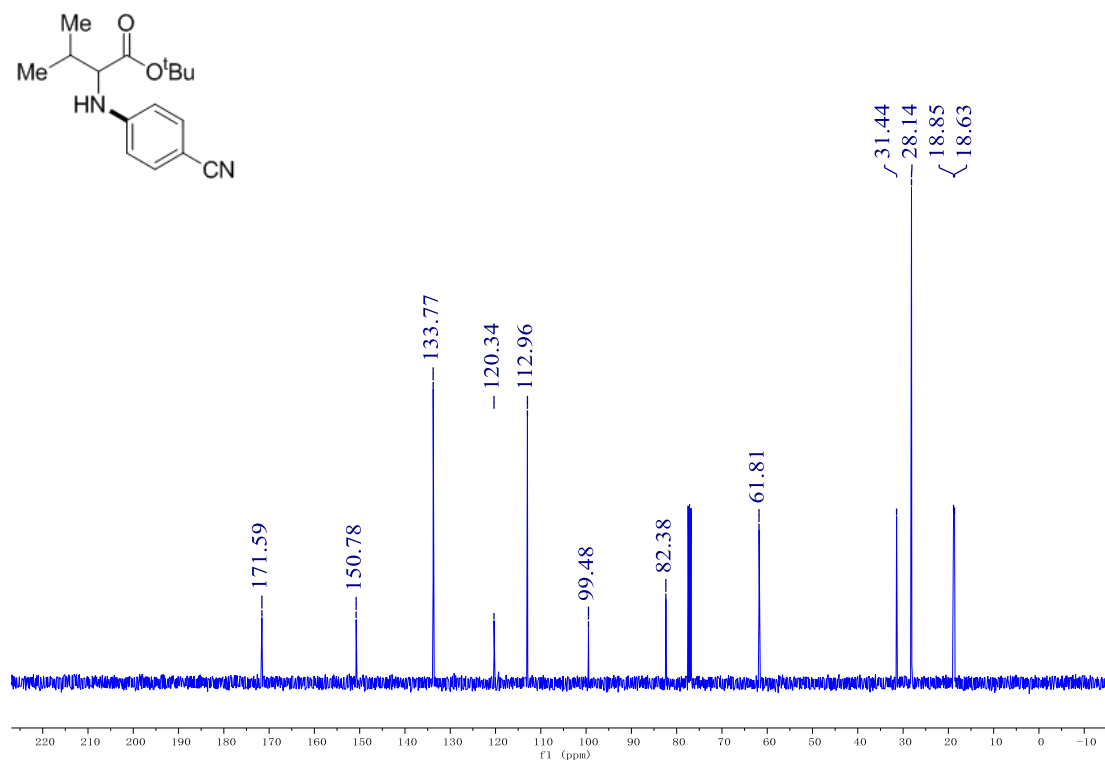

5c

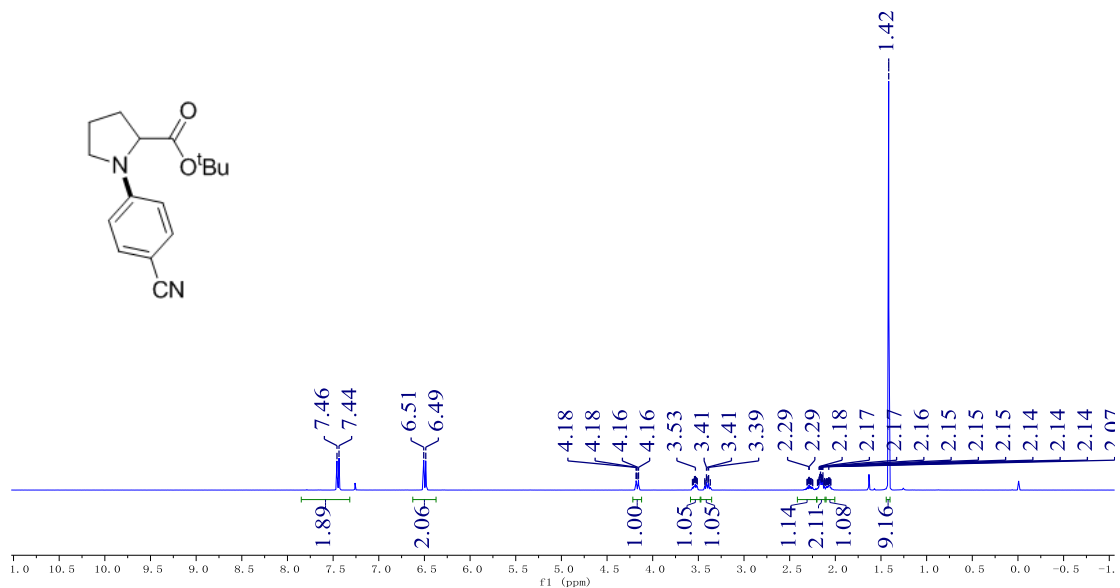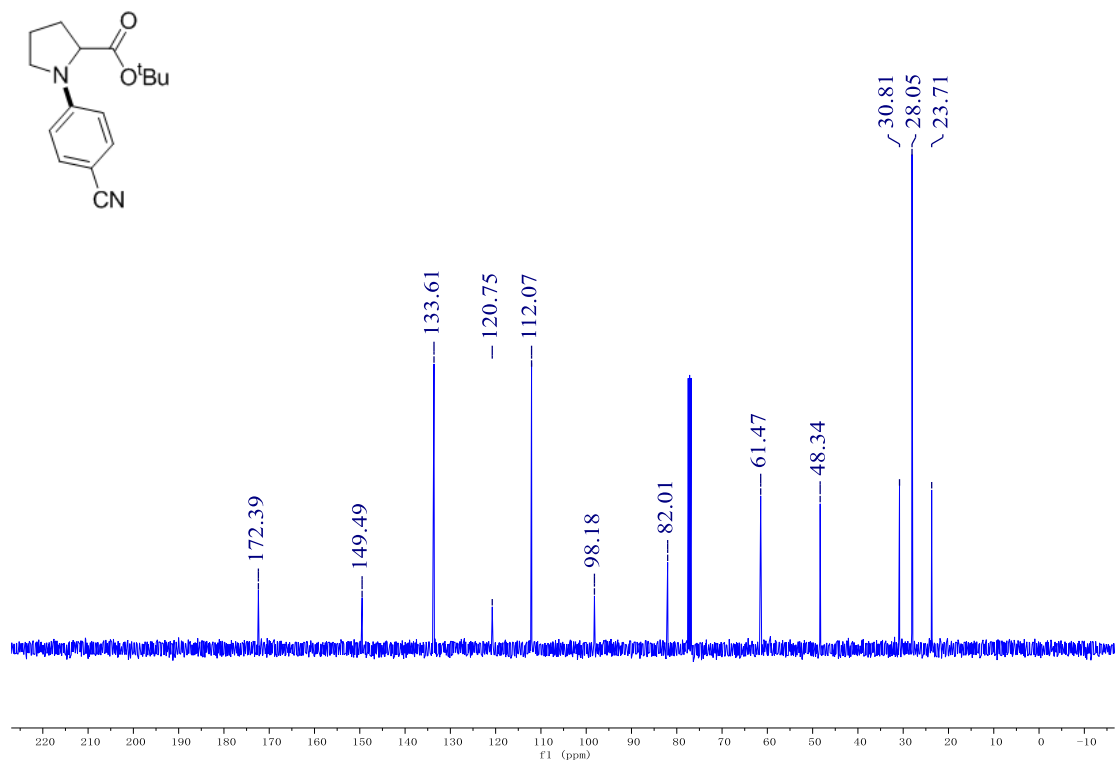

5d

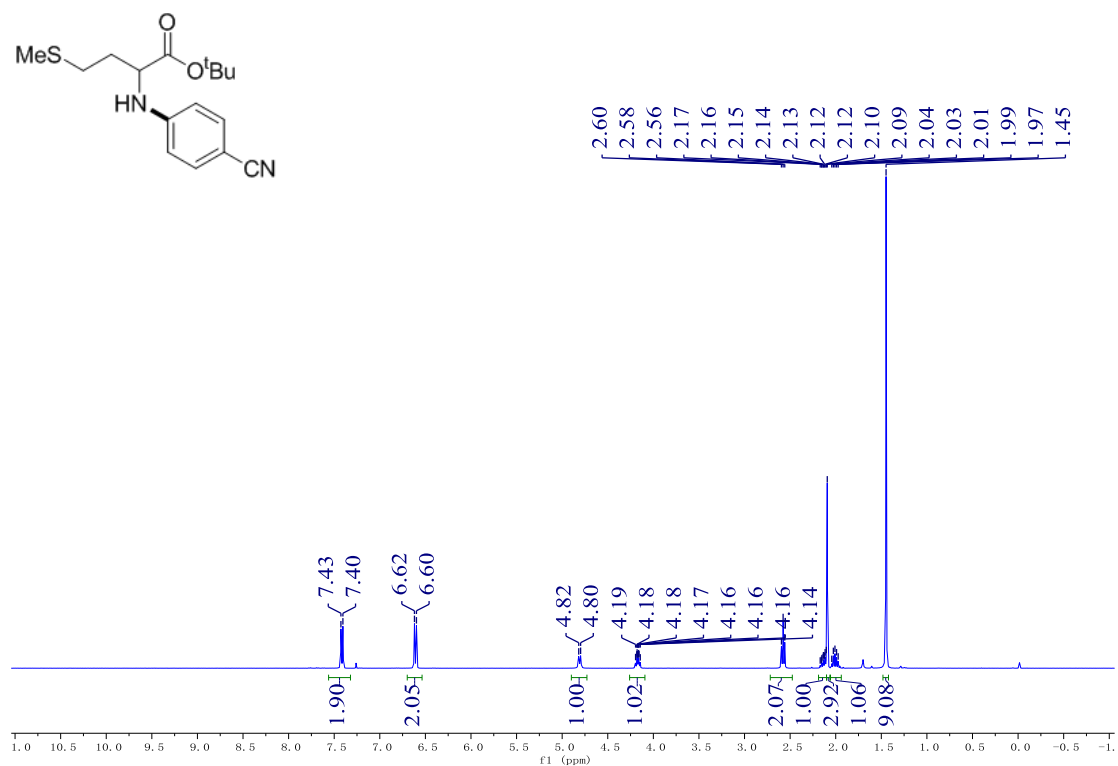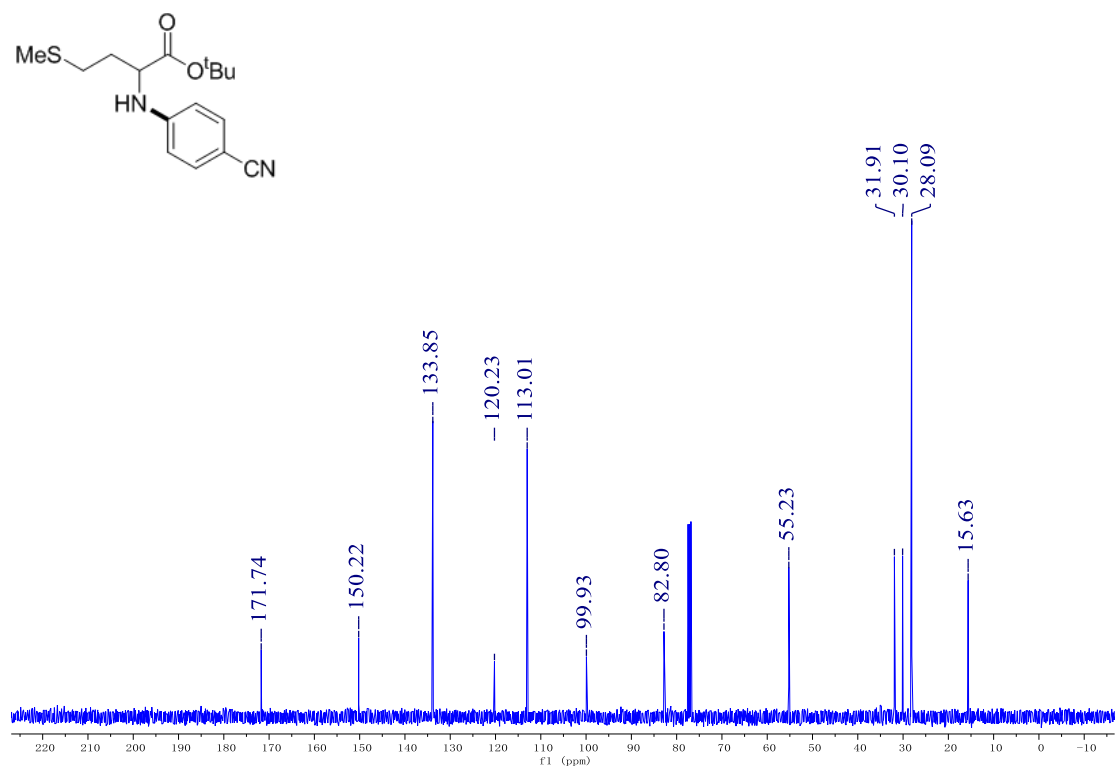

5e

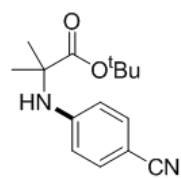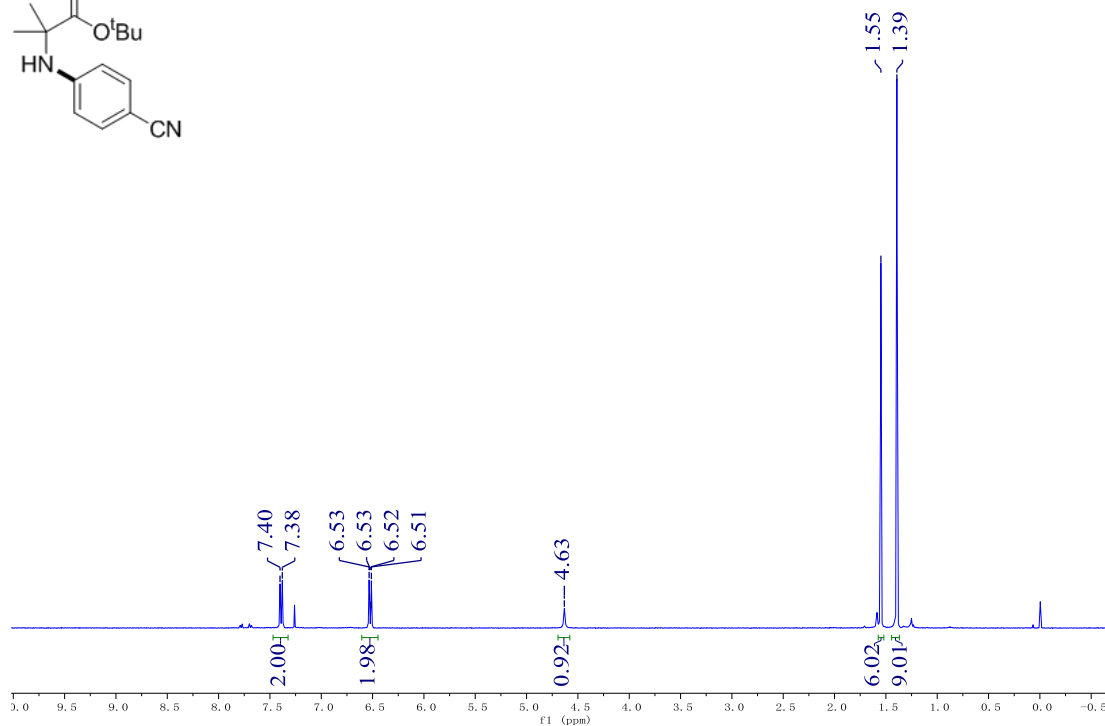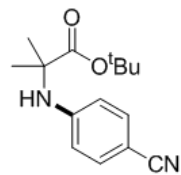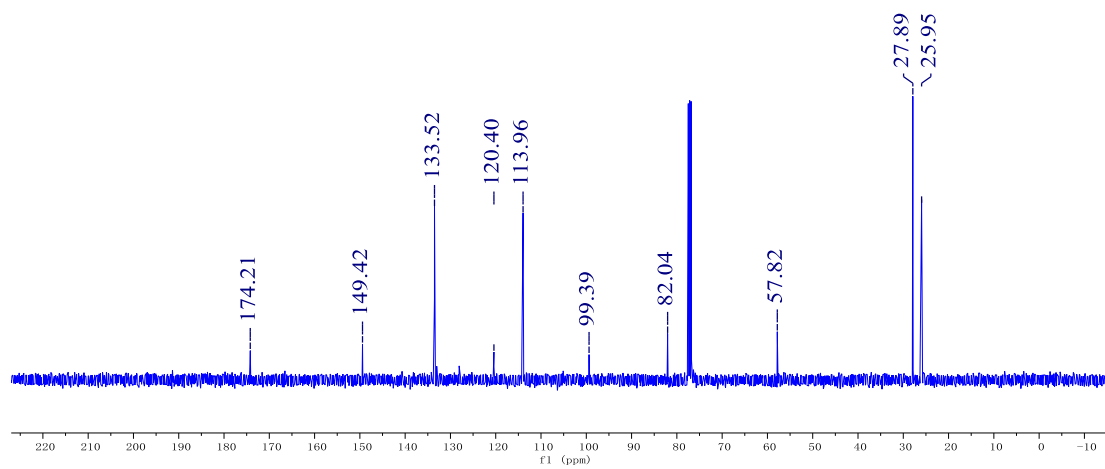

6a

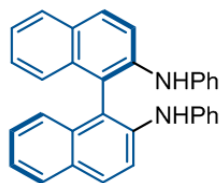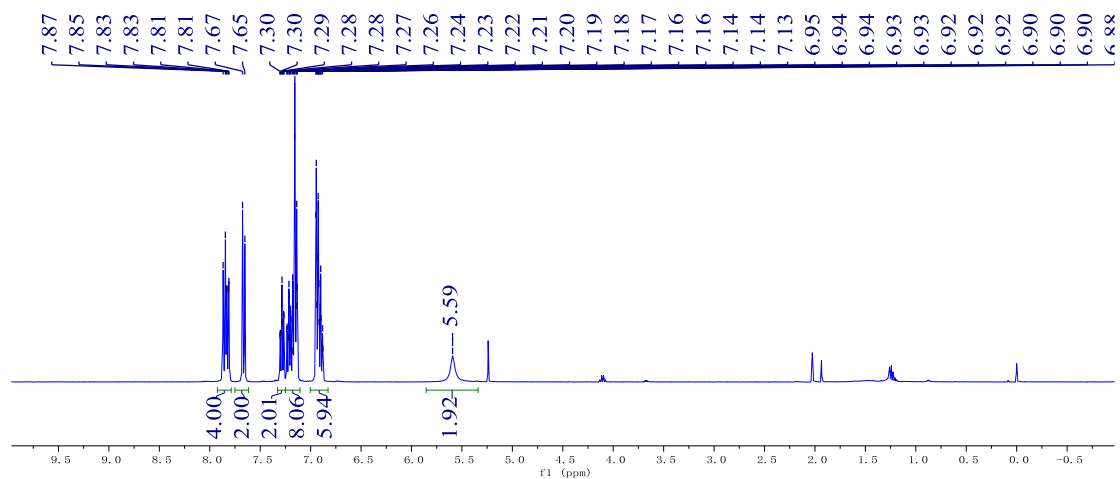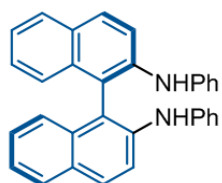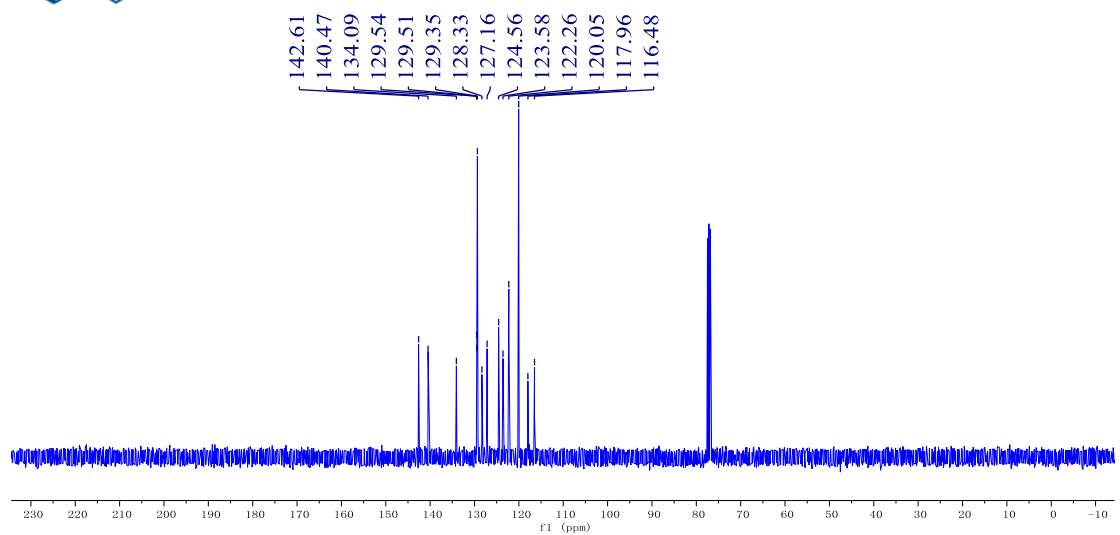



6b

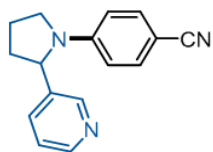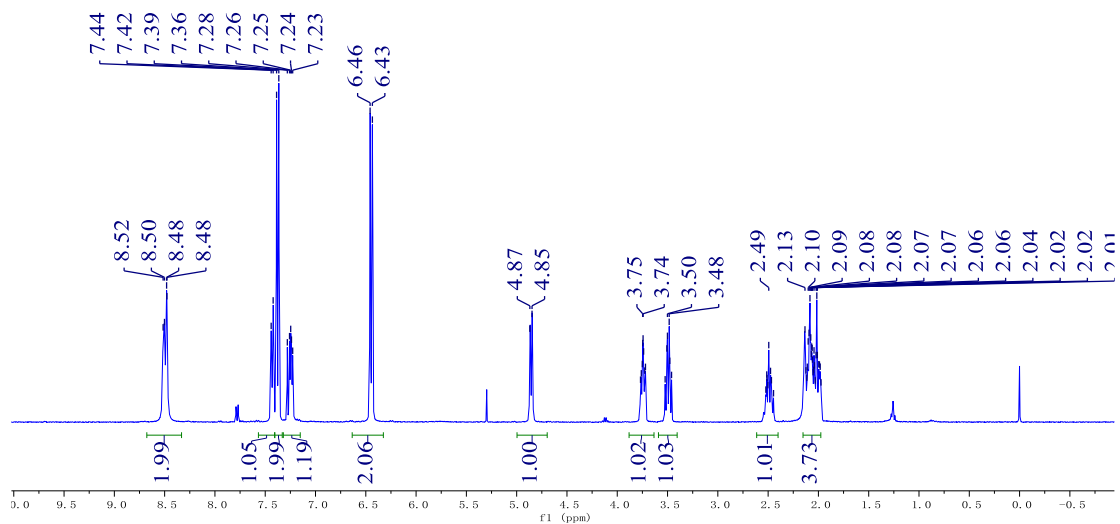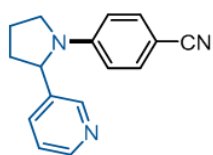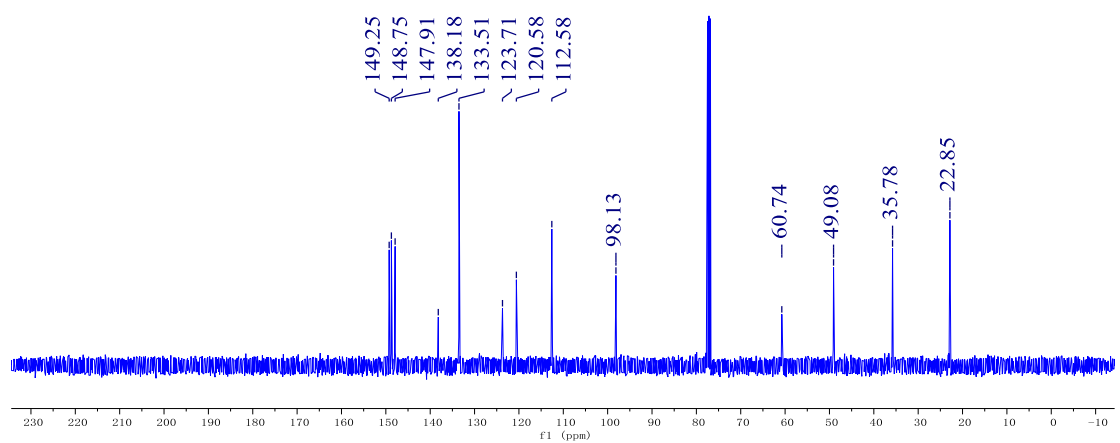

6c

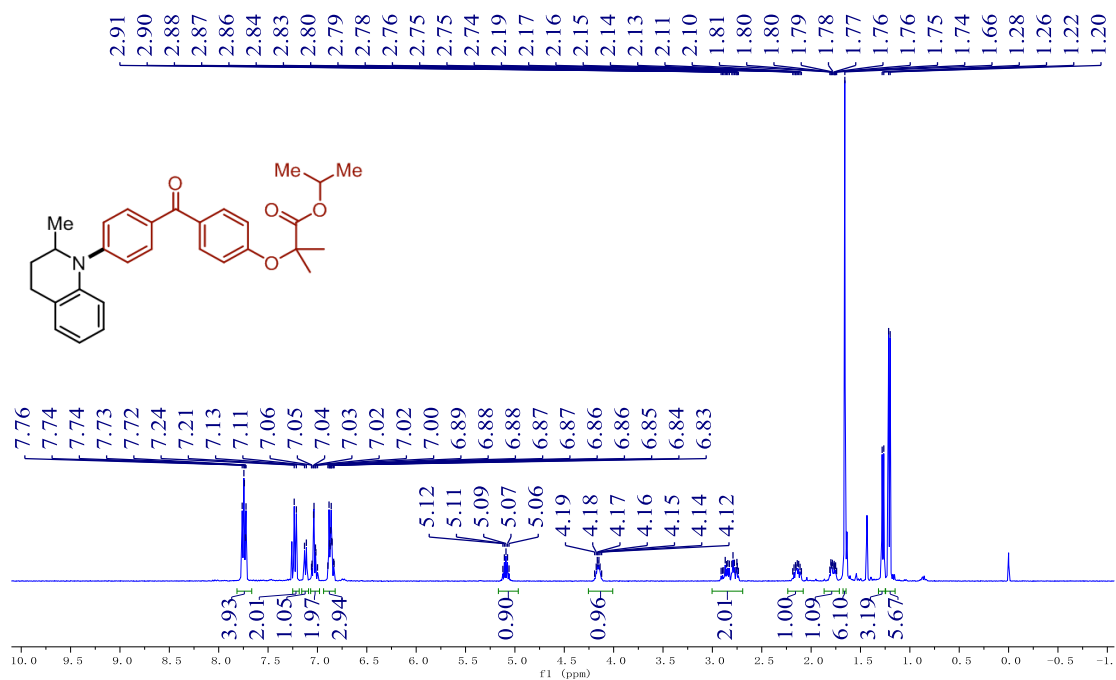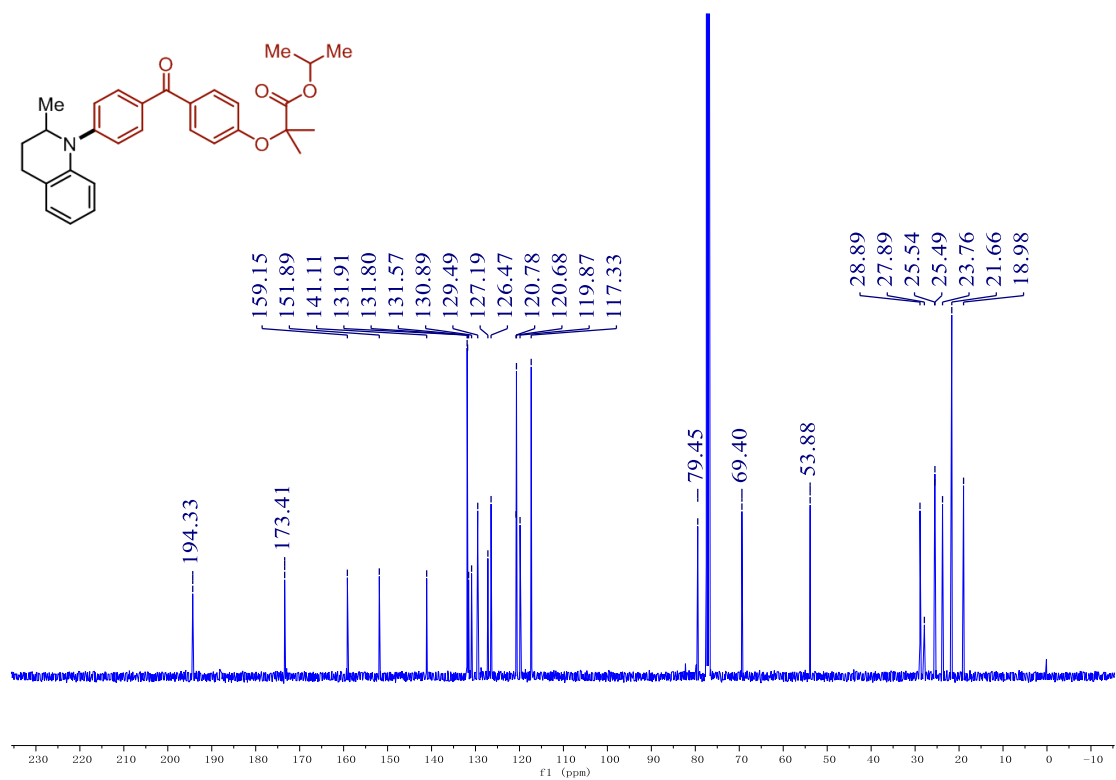

6d

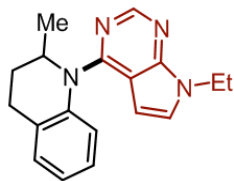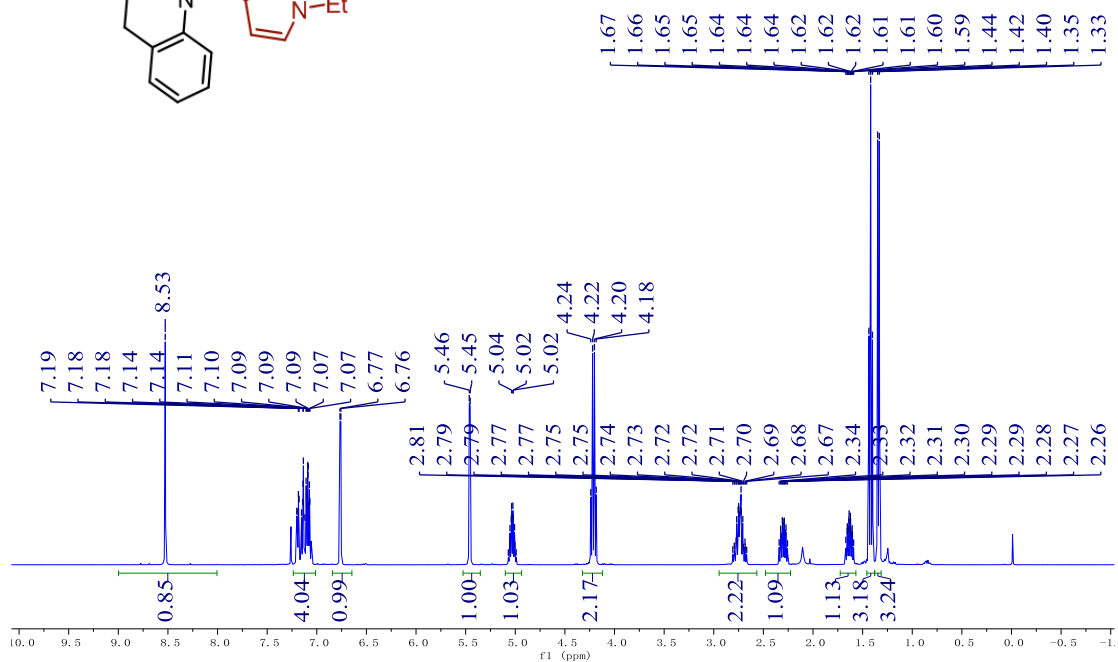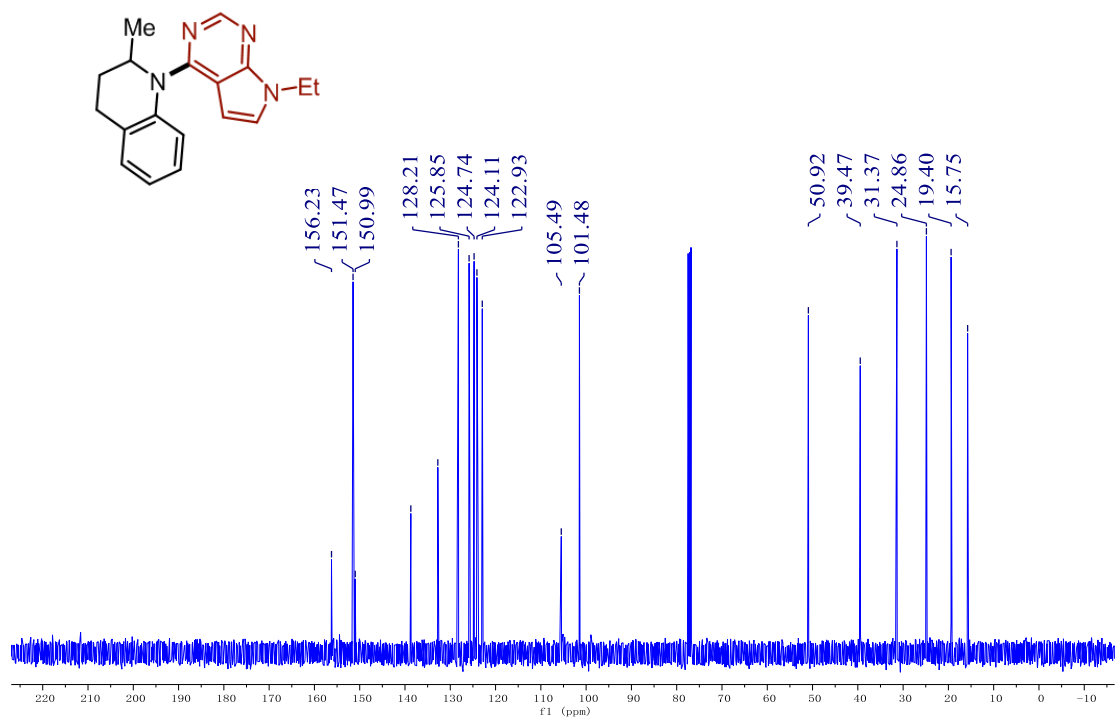

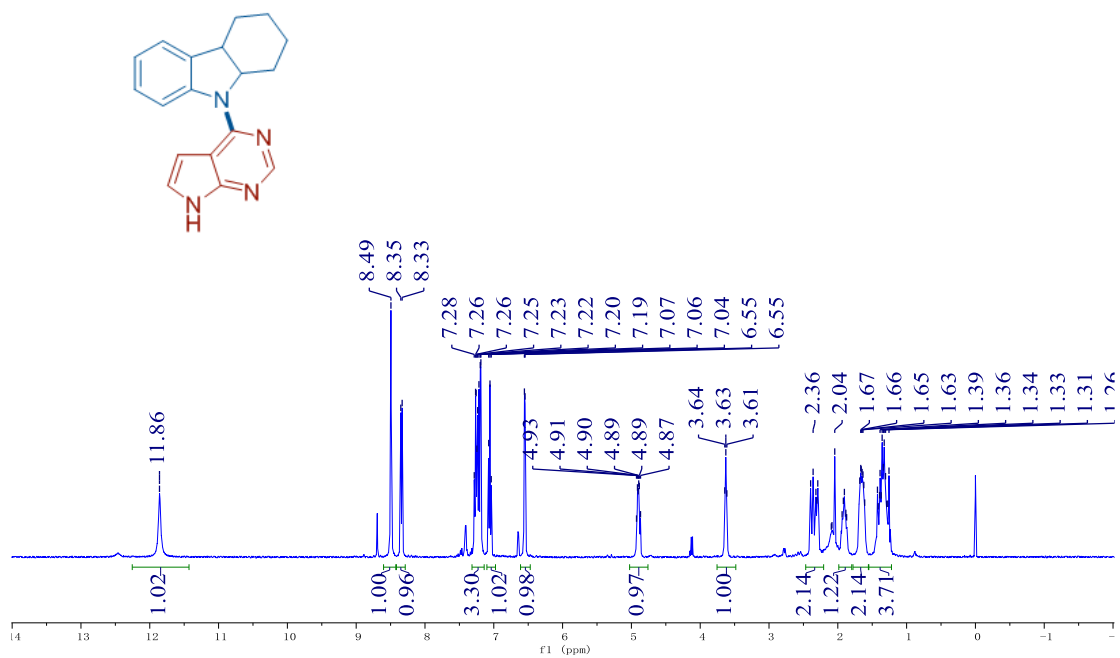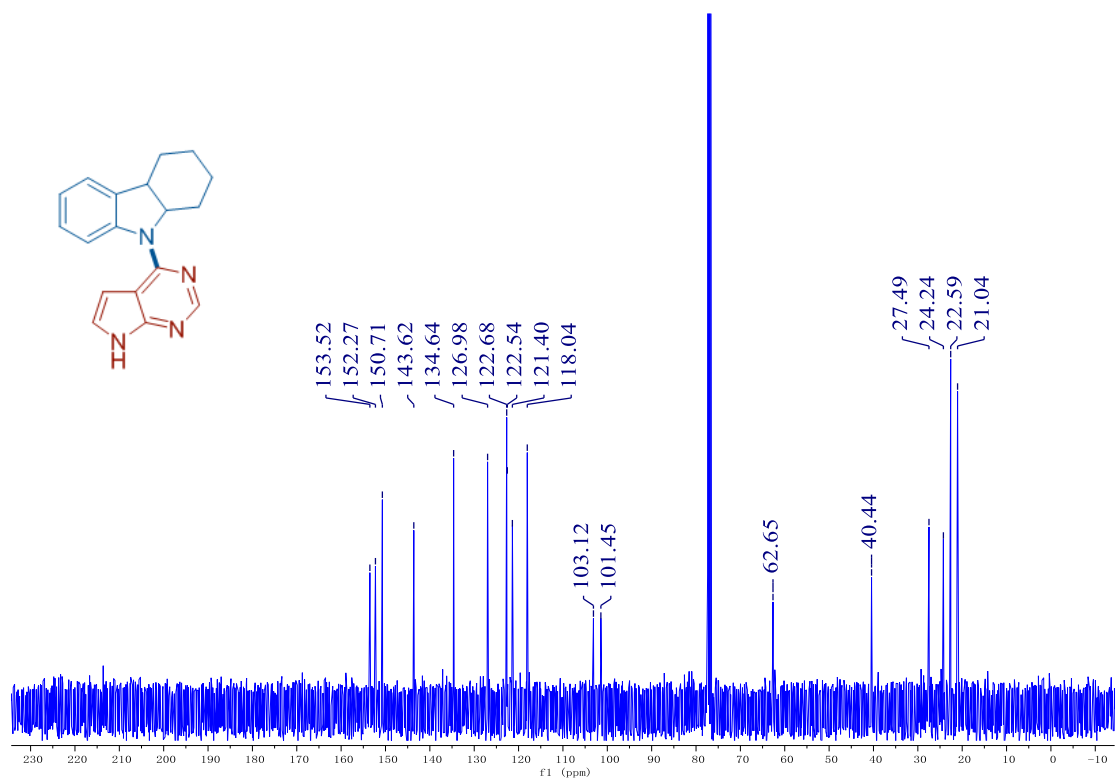

8

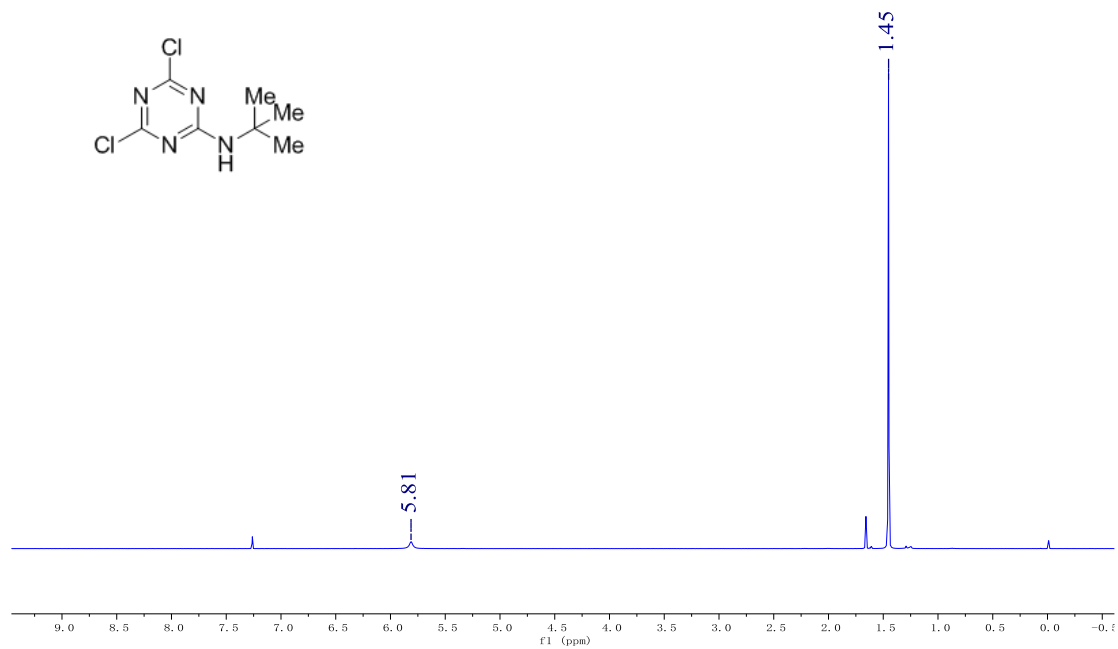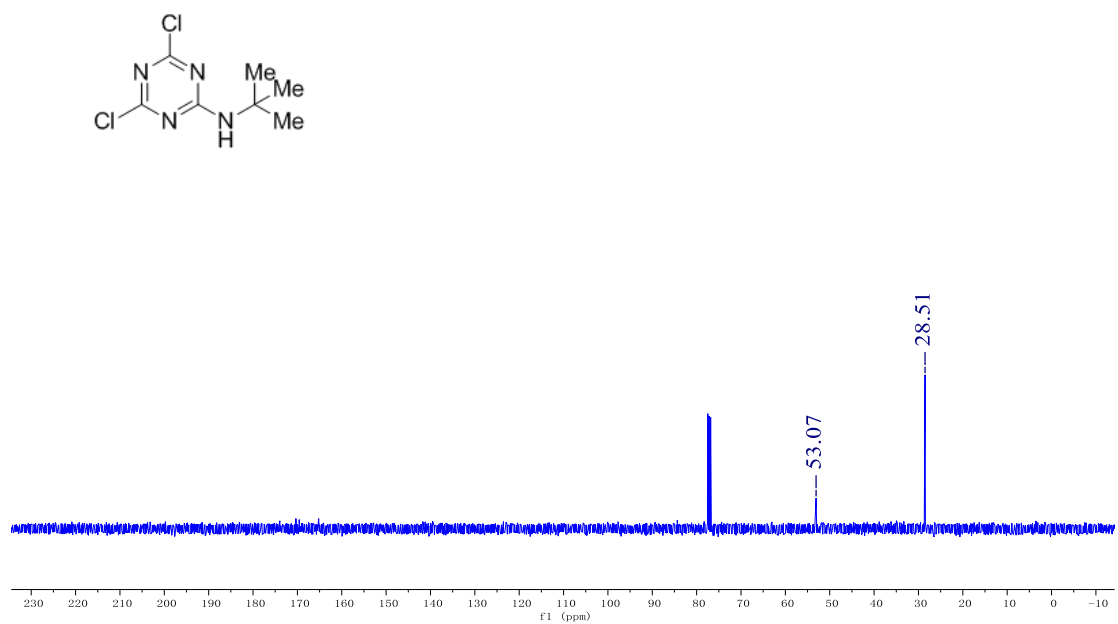

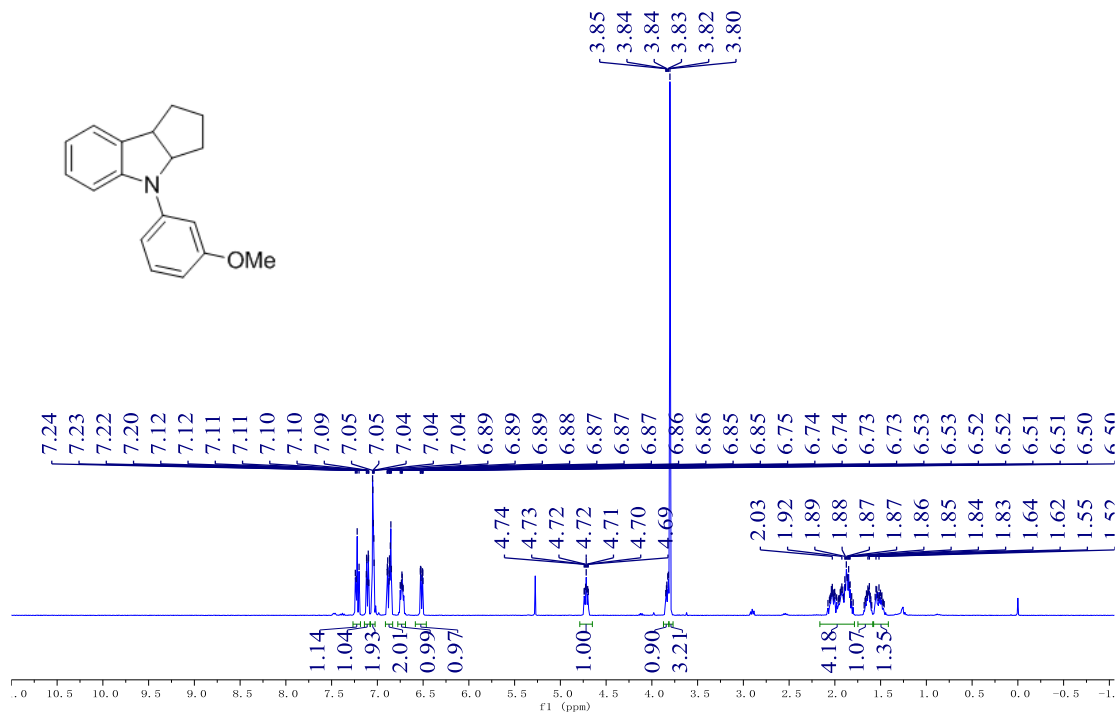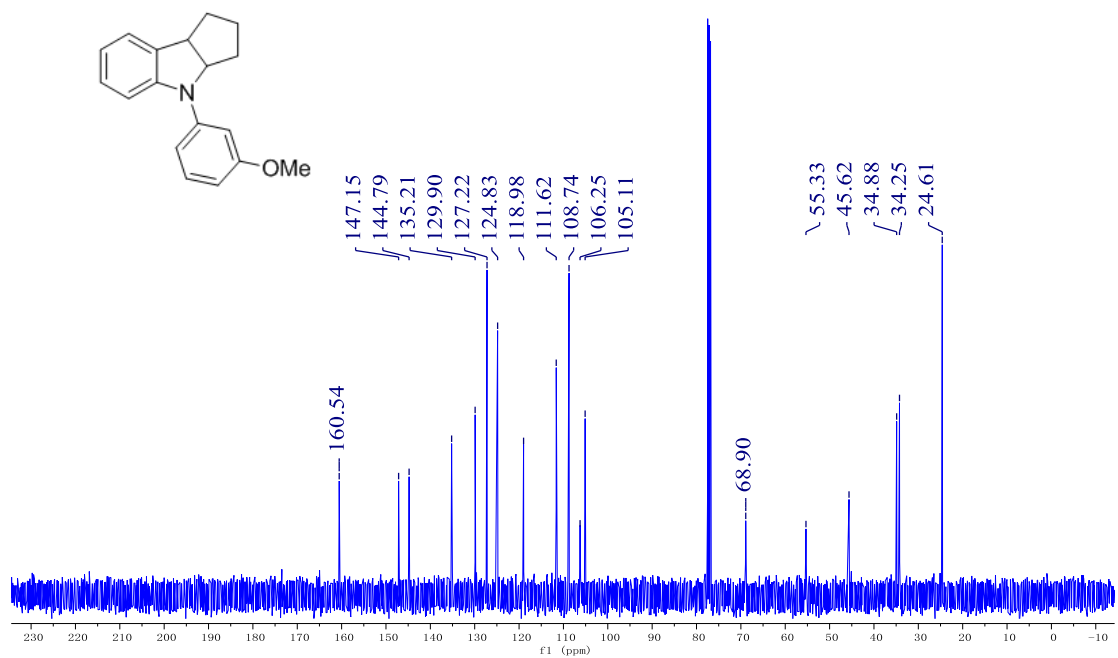

Supplement: d3sc00492a1.pdf [file d3sc00492a1.pdf]
